# Supplementary material
Source: publisher figshare collection journal article supplement (https://gsajournals.figshare.com/ndownloader/files/25472753)
Supplement: Supplementary file 1 [file 25472753]

## Sheet: File_S2_Legend
		Additional file 2. Differential Expression Results. Differential expression analyses were performed in CLC Genomics Workbench 11 (Qiagen) using a Generalized Linear Model (GLM). Each transgenic line was normalized against the control line (Attp2). Results were filtered by FDR P-value<0.05 (green cells) and Log2FC>0.5 (up regulated; pink cells) or Log2FC<-0.5 (down regulated; blue cells) and analy…

## Sheet: File_S2
		LARVAE									FEMALES (non-exercised)									EXERCISED FEMALES									MALES (non-exercised)									EXERCISED MALES
Flybase ID	NAME	Log₂ fold change (A31P)	FDR p-value (A31P)	NegLog10 (FDR) (A31P)	Log₂ fold change (R820W)	FDR p-value (R820W)	NegLog10 (FDR) (R820W)	Log₂ fold change (WT)	FDR p-value (WT)	NegLog10 (FDR) (WT)	Log₂ fold change (A31P)	FDR p-value (A31P)	NegLog10 (FDR) (A31P)	Log₂ fold change (R820W)	FDR p-value (R820W)	NegLog10 (FDR) (R820W)	Log₂ fold change (WT)	FDR p-value (WT)	NegLog10 (FDR) (WT)	Log₂ fold change (A31P)	FDR p-value (A31P)	NegLog10 (FDR) (A31P)	Log₂ fold change (R820W)	FDR p-value (R820W)	NegLog10 (FDR) (R820W)	Log₂ fold change (WT)	FDR p-value (WT)	NegLog10 (FDR) (WT)	Log₂ fold change (A31P)	FDR p-value (A31P)	NegLog10 (FDR) (A31P)	Log₂ fold change (R820W)	FDR p-value (R820W)	NegLog10 (FDR) (R820W)	Log₂ fold change (WT)	FDR p-value (WT)	NegLog10 (FDR) (WT)	Log₂ fold change (A31P)	FDR p-value (A31P)	NegLog10 (FDR) (A31P)	Log₂ fold change (R820W)	FDR p-value (R820W)	NegLog10 (FDR) (R820W)	Log₂ fold change (WT)	FDR p-value (WT)	NegLog10 (FDR) (WT)
FBgn0010339	128up	-0.15	1	0	-0.17	1	0	-0.07	1	0	0.03	1	0	-0.12	0.94	0.0268721	0.12	1	0	0.06	1	0	0.22	0.88	0.0555173	0.14	1	0	0.03	1	0	0.13	0.96	0.0177288	0.03	1	0	0.29	0.81	0.091515	0.12	1	0	-0.01	1	0
FBgn0010340	140up	-0.03	1	0	-0.12	1	0	-0.29	1	0	0.02	1	0	-0.22	0.85	0.0705811	-0.08	1	0	-0.00291	1	0	-0.2	0.96	0.0177288	0.02	1	0	-0.00856	1	0	0.02	1	0	-0.15	0.92	0.0362122	0.06	1	0	-0.13	1	0	-0.1	1	0
FBgn0020238	14-3-3epsilon	-0.1	1	0	-0.04	1	0	-0.05	1	0	0.02	1	0	-0.02	1	0	0.07	1	0	-0.02	1	0	0.08	1	0	0.01	1	0	0.2	0.6	0.221849	0.11	0.92	0.0362122	0.08	0.96	0.0177288	0.12	0.94	0.0268721	-0.03	1	0	-0.00904	1	0
FBgn0004907	14-3-3zeta	-0.21	1	0	-0.18	1	0	-0.27	1	0	0.15	1	0	0.15	0.92	0.0362122	-0.09	1	0	-0.02	1	0	-0.09	1	0	-0.03	1	0	-0.04	1	0	0.08	1	0	-0.13	0.94	0.0268721	-0.11	0.96	0.0177288	-0.09	1	0	-0.05	1	0
FBgn0085813	18SrRNA-Psi:CR41602	0.1	1	0	0.85	1	0	0.15	1	0	0.22	1	0	0.71	0.69	0.161151	0.42	1	0	-0.46	1	0	-0.66	0.07	1.1549	-0.57	0.57	0.244125	0.02	1	0	-0.1	1	0	0.31	0.56	0.251812	-0.28	0.33	0.481486	0.15	0.94	0.0268721	-0.03	1	0
FBgn0267521	18SrRNA-Psi:CR45861	-0.05	1	0	0.91	0.9	0.0457575	0.7	0.6	0.221849	0.44	1	0	1.37	0.65	0.187087	0.66	1	0	-0.14	1	0	-0.41	0.85	0.0705811	-0.25	1	0	0.01	1	0	0.03	1	0	0.44	0.38	0.420216	-0.3	0.62	0.207608	0.36	0.43	0.366532	-0.14	1	0
FBgn0004364	18w	-0.05	1	0	-0.12	1	0	-0.03	1	0	0.32	1	0	0.53	0.21	0.677781	0.17	1	0	0.33	1	0	-0.38	0.96	0.0177288	-0.08	1	0	-0.00266	1	0	-0.02	1	0	-0.05	1	0	-0.3	0.87	0.0604807	-0.13	1	0	-0.41	0.64	0.19382
FBgn0250848	26-29-p	0.07	1	0	0.15	1	0	-0.24	1	0	-0.29	1	0	-0.49	0.48	0.318759	0.05	1	0	-0.11	1	0	0.04	1	0	0.00913	1	0	0.05	1	0	-0.03	1	0	0.14	0.84	0.0757207	0.42	0.61	0.21467	-0.00285	1	0	-0.12	1	0
FBgn0085771	28SrRNA-Psi:CR40741	0.21	1	0	1.16	0.33	0.481486	0.34	1	0	-0.08	1	0	0.11	1	0	0.46	1	0	-0.72	0.28	0.552842	-0.49	0.66	0.180456	-0.34	1	0	-0.21	0.92	0.0362122	-0.59	0.27	0.568636	0.43	0.47	0.327902	-0.54	0.05	1.30103	0.27	0.78	0.107905	-0.14	1	0
FBgn0085819	28SrRNA-Psi:CR41609	-0.01	1	0	0.19	1	0	0.06	1	0	-0.43	1	0	-0.21	0.9	0.0457575	0.01	1	0	0.03	1	0	0.39	0.95	0.0222764	0.31	1	0	-0.08	1	0	-0.12	0.99	0.00436481	-0.12	0.97	0.0132283	0.04	1	0	0.82	0.00157	2.8041	-0.33	0.65	0.187087
FBgn0267513	28SrRNA-Psi:CR45853	-0.03	1	0	3.23	1	0	2.27	1	0	2.41	1	0	0.13	1	0	0.05	1	0	-0.07	1	0	-0.04	1	0	2.48	1	0	4.74	0.64	0.19382	2.2	0.97	0.0132283	-0.03	1	0	1.73	0.89	0.05061	1.02	1	0	-2.3	1	0
FBgn0267515	28SrRNA-Psi:CR45855	-0.24	1	0	0.51	1	0	0.51	0.78	0.107905	0.34	1	0	0.62	0.62	0.207608	0.49	1	0	-0.02	1	0	-0.08	1	0	0.05	1	0	-0.28	0.79	0.102373	-0.16	0.97	0.0132283	0.08	1	0	-0.08	1	0	0.6	0.07	1.1549	0.01	1	0
FBgn0267519	28SrRNA-Psi:CR45859	0.02	1	0	0.44	1	0	0.08	1	0	0.54	1	0	0.95	0.45	0.346787	0.54	1	0	-0.12	1	0	-0.38	0.92	0.0362122	-0.21	1	0	-0.38	0.54	0.267606	-0.26	0.84	0.0757207	0.03	1	0	-0.1	0.99	0.00436481	0.59	0.03	1.52288	0.04	1	0
FBgn0267520	28SrRNA-Psi:CR45860	0.29	1	0	1.02	0.06	1.22185	0.48	0.64	0.19382	-0.03	1	0	0.09	1	0	0.4	1	0	-0.73	0.25	0.60206	-0.24	0.96	0.0177288	0.12	1	0	-0.19	0.94	0.0268721	-0.45	0.48	0.318759	0.31	0.7	0.154902	-0.59	0.02	1.69897	0.04	1	0	-0.06	1	0
FBgn0267522	28SrRNA-Psi:CR45862	-0.00946	1	0	0.38	1	0	0.19	1	0	0.77	1	0	1.01	0.37	0.431798	0.72	1	0	-0.08	1	0	-0.05	1	0	0.14	1	0	-0.14	0.96	0.0177288	-0.16	0.96	0.0177288	0.24	0.83	0.0809219	0.11	0.97	0.0132283	0.78	0.000968	3.01412	0.02	1	0
FBgn0260793	2mit	-0.07	1	0	-0.04	1	0	-0.09	1	0	0.25	1	0	0.54	0.39	0.408935	-0.24	1	0	0.03	1	0	-0.57	0.96	0.0177288	-0.4	1	0	0.009	1	0	0.06	1	0	-0.15	0.91	0.0409586	-0.04	1	0	-0.08	1	0	-0.14	1	0
FBgn0053100	4EHP	-0.26	1	0	-0.02	1	0	-0.2	1	0	0.13	1	0	0.09	0.98	0.00877392	0.28	1	0	0.05	1	0	0.11	0.96	0.0177288	-0.02	1	0	-0.00289	1	0	0.08	0.98	0.00877392	-0.13	0.86	0.0655015	0.1	0.96	0.0177288	0.13	0.99	0.00436481	-0.03	1	0
FBgn0052016	4E-T	-0.08	1	0	0.02	1	0	-0.000504	1	0	-0.09	1	0	-0.21	0.8	0.09691	0.1	1	0	0.03	1	0	0.15	0.96	0.0177288	0.07	1	0	-0.08	0.97	0.0132283	0.05	1	0	-0.09	0.94	0.0268721	0.08	0.97	0.0132283	-0.04	1	0	-0.08	1	0
FBgn0250731	5.8SrRNA:CR40454	0.62	0.95	0.0222764	0.84	1	0	0.28	1	0	0.59	1	0	1.04	0.69	0.161151	1.47	1	0	-0.13	1	0	0.33	0.96	0.0177288	1	0.55	0.259637	-0.53	0.91	0.0409586	1.29	0.4	0.39794	1.63	0.13	0.886057	-0.07	1	0	1.31	6.13e-09	8.21254	0.26	0.86	0.0655015
FBgn0267514	5.8SrRNA-Psi:CR45854	0.6	0.99	0.00436481	0.82	1	0	0.26	1	0	0.59	1	0	1.03	0.68	0.167491	1.46	1	0	-0.13	1	0	0.33	0.96	0.0177288	0.99	0.57	0.244125	-0.45	0.95	0.0222764	1.34	0.36	0.443697	1.67	0.11	0.958607	-0.06	1	0	1.31	5.27e-09	8.27819	0.26	0.87	0.0604807
FBgn0267517	5.8SrRNA-Psi:CR45857	2.28	1	0	0.13	1	0	-0.06	1	0	#N/A	#N/A	#N/A	#N/A	#N/A	#N/A	#N/A	#N/A	#N/A	-1.25	1	0	-0.45	1	0	0.44	1	0	#N/A	#N/A	#N/A	#N/A	#N/A	#N/A	#N/A	#N/A	#N/A	2.26	0.96	0.0177288	0.07	1	0	3.17	1	0
FBgn0267523	5.8SrRNA-Psi:CR45863	0.05	1	0	0.79	1	0	0.16	1	0	1	1	0	0.76	0.9	0.0457575	1.4	1	0	0.05	1	0	0.29	0.96	0.0177288	0.97	1	0	-1.1	0.94	0.0268721	-0.2	1	0	0.45	1	0	-0.19	1	0	1.69	0.26	0.585027	0.32	1	0
FBgn0004168	5-HT1A	-0.22	1	0	-0.25	1	0	-0.32	1	0	0.03	1	0	0.42	0.84	0.0757207	-0.11	1	0	0.2	1	0	-0.42	0.96	0.0177288	-0.57	1	0	0.13	0.99	0.00436481	-0.15	0.97	0.0132283	-0.12	1	0	-0.00473	1	0	-0.06	1	0	0.1	1	0
FBgn0263116	5-HT1B	-0.51	1	0	-0.67	1	0	-0.37	1	0	0.2	1	0	0.57	0.68	0.167491	-0.04	1	0	0.18	1	0	-0.13	1	0	-0.19	1	0	0.12	1	0	0.21	0.92	0.0362122	-0.16	0.95	0.0222764	0.03	1	0	-0.02	1	0	-0.000202	1	0
FBgn0087012	5-HT2A	0.32	1	0	-0.16	1	0	0.16	1	0	-0.1	1	0	0.17	0.93	0.0315171	-0.22	1	0	-0.07	1	0	-0.21	0.96	0.0177288	0.06	1	0	-0.17	0.76	0.119186	-0.25	0.54	0.267606	-0.11	0.93	0.0315171	-0.24	0.77	0.113509	-0.17	0.98	0.00877392	-0.2	0.92	0.0362122
FBgn0261929	5-HT2B	-0.97	1	0	-0.17	1	0	-0.22	1	0	0.34	1	0	0.42	0.85	0.0705811	-0.09	1	0	-0.65	1	0	-1.37	0.55	0.259637	-1.09	1	0	-0.25	0.83	0.0809219	-0.09	1	0	-0.11	1	0	-0.01	1	0	0.04	1	0	-0.06	1	0
FBgn0004573	5-HT7	0.01	1	0	0.12	1	0	0.06	1	0	-0.01	1	0	0.57	0.67	0.173925	-0.49	1	0	-0.14	1	0	-0.76	0.96	0.0177288	-0.34	1	0	0.02	1	0	0.21	0.93	0.0315171	0.1	1	0	-0.1	1	0	0.03	1	0	-0.1	1	0
FBgn0259178	5PtaseI	-0.3	1	0	-0.15	1	0	0.05	1	0	-0.16	1	0	-0.23	0.8	0.09691	-0.06	1	0	0.02	1	0	0.13	0.96	0.0177288	-0.03	1	0	-0.16	0.94	0.0268721	-0.09	1	0	-0.08	1	0	0.09	1	0	-0.03	1	0	-0.07	1	0
FBgn0053366	5SrRNA:CR33366	2.28	1	0	0.13	1	0	-0.06	1	0	#N/A	#N/A	#N/A	#N/A	#N/A	#N/A	#N/A	#N/A	#N/A	-0.75	1	0	0.13	1	0	1.23	1	0	#N/A	#N/A	#N/A	#N/A	#N/A	#N/A	#N/A	#N/A	#N/A	-0.03	1	0	0.07	1	0	2.32	1	0
FBgn0053367	5SrRNA:CR33367	0.81	1	0	2.31	1	0	-3.3	0.99	0.00436481	0.03	1	0	0.13	1	0	2.31	1	0	-0.28	1	0	1.17	0.96	0.0177288	1.93	1	0	2.21	0.96	0.0177288	-0.09	1	0	-0.03	1	0	#N/A	#N/A	#N/A	#N/A	#N/A	#N/A	#N/A	#N/A	#N/A
FBgn0053375	5SrRNA:CR33375	-1.33	1	0	-0.32	1	0	-2.2	0.81	0.091515	#N/A	#N/A	#N/A	#N/A	#N/A	#N/A	#N/A	#N/A	#N/A	-0.16	1	0	0.74	0.96	0.0177288	1.83	1	0	#N/A	#N/A	#N/A	#N/A	#N/A	#N/A	#N/A	#N/A	#N/A	#N/A	#N/A	#N/A	#N/A	#N/A	#N/A	#N/A	#N/A	#N/A
FBgn0053378	5SrRNA:CR33378	#N/A	#N/A	#N/A	#N/A	#N/A	#N/A	#N/A	#N/A	#N/A	#N/A	#N/A	#N/A	#N/A	#N/A	#N/A	#N/A	#N/A	#N/A	-0.07	1	0	2.18	0.96	0.0177288	3.34	1	0	#N/A	#N/A	#N/A	#N/A	#N/A	#N/A	#N/A	#N/A	#N/A	#N/A	#N/A	#N/A	#N/A	#N/A	#N/A	#N/A	#N/A	#N/A
FBgn0053391	5SrRNA:CR33391	-0.03	1	0	2.39	1	0	-0.06	1	0	-2.38	1	0	-0.00771	1	0	-0.1	1	0	2.28	1	0	2.18	0.96	0.0177288	5.22	1	0	2.21	0.96	0.0177288	-0.09	1	0	-0.03	1	0	-0.87	1	0	-0.68	1	0	-3.14	1	0
FBgn0053398	5SrRNA:CR33398	-2.41	1	0	-2.25	1	0	-2.45	1	0	#N/A	#N/A	#N/A	#N/A	#N/A	#N/A	#N/A	#N/A	#N/A	-0.04	1	0	0.69	1	0	0.16	1	0	#N/A	#N/A	#N/A	#N/A	#N/A	#N/A	#N/A	#N/A	#N/A	#N/A	#N/A	#N/A	#N/A	#N/A	#N/A	#N/A	#N/A	#N/A
FBgn0053400	5SrRNA:CR33400	1.11	1	0	0.91	1	0	-0.12	1	0	#N/A	#N/A	#N/A	#N/A	#N/A	#N/A	#N/A	#N/A	#N/A	-1.08	1	0	0.47	0.98	0.00877392	0.95	1	0	#N/A	#N/A	#N/A	#N/A	#N/A	#N/A	#N/A	#N/A	#N/A	2.26	0.96	0.0177288	2.45	1	0	-0.00902	1	0
FBgn0053401	5SrRNA:CR33401	0.61	1	0	0.92	1	0	-0.14	1	0	#N/A	#N/A	#N/A	#N/A	#N/A	#N/A	#N/A	#N/A	#N/A	-0.35	1	0	0.69	0.96	0.0177288	1.32	1	0	#N/A	#N/A	#N/A	#N/A	#N/A	#N/A	#N/A	#N/A	#N/A	#N/A	#N/A	#N/A	#N/A	#N/A	#N/A	#N/A	#N/A	#N/A
FBgn0053402	5SrRNA:CR33402	0.81	1	0	1.68	1	0	-0.12	1	0	#N/A	#N/A	#N/A	#N/A	#N/A	#N/A	#N/A	#N/A	#N/A	-0.15	1	0	0.64	0.96	0.0177288	2.12	1	0	#N/A	#N/A	#N/A	#N/A	#N/A	#N/A	#N/A	#N/A	#N/A	-0.03	1	0	2.45	1	0	-0.00902	1	0
FBgn0053405	5SrRNA:CR33405	#N/A	#N/A	#N/A	#N/A	#N/A	#N/A	#N/A	#N/A	#N/A	-3.23	1	0	-3.13	0.84	0.0757207	-0.95	1	0	2.3	1	0	3.63	0.96	0.0177288	4.89	1	0	-0.09	1	0	-0.09	1	0	2.29	0.94	0.0268721	-2.31	0.96	0.0177288	-2.22	1	0	-2.3	1	0
FBgn0053407	5SrRNA:CR33407	-1.06	1	0	1.53	1	0	-0.12	1	0	-2.38	1	0	-0.00771	1	0	-0.1	1	0	-0.53	1	0	0.9	0.96	0.0177288	1.68	1	0	-0.17	1	0	-0.18	1	0	-2.41	0.94	0.0268721	-0.03	1	0	3.31	0.98	0.00877392	3.17	1	0
FBgn0053418	5SrRNA:CR33418	#N/A	#N/A	#N/A	#N/A	#N/A	#N/A	#N/A	#N/A	#N/A	#N/A	#N/A	#N/A	#N/A	#N/A	#N/A	#N/A	#N/A	#N/A	-2.39	1	0	-0.14	1	0	1.02	1	0	#N/A	#N/A	#N/A	#N/A	#N/A	#N/A	#N/A	#N/A	#N/A	#N/A	#N/A	#N/A	#N/A	#N/A	#N/A	#N/A	#N/A	#N/A
FBgn0053419	5SrRNA:CR33419	2	1	0	0.85	1	0	1.94	0.94	0.0268721	0.00581	1	0	-2.27	0.9	0.0457575	-2.35	1	0	-1.74	1	0	0.43	1	0	1.13	1	0	#N/A	#N/A	#N/A	#N/A	#N/A	#N/A	#N/A	#N/A	#N/A	-0.03	1	0	0.07	1	0	3.17	1	0
FBgn0053420	5SrRNA:CR33420	1.74	1	0	0.89	1	0	-0.11	1	0	#N/A	#N/A	#N/A	#N/A	#N/A	#N/A	#N/A	#N/A	#N/A	-0.46	1	0	0.56	0.97	0.0132283	1.64	1	0	#N/A	#N/A	#N/A	#N/A	#N/A	#N/A	#N/A	#N/A	#N/A	#N/A	#N/A	#N/A	#N/A	#N/A	#N/A	#N/A	#N/A	#N/A
FBgn0053423	5SrRNA:CR33423	2.28	1	0	2.39	1	0	-0.06	1	0	#N/A	#N/A	#N/A	#N/A	#N/A	#N/A	#N/A	#N/A	#N/A	-0.68	1	0	1.38	0.96	0.0177288	2	1	0	#N/A	#N/A	#N/A	#N/A	#N/A	#N/A	#N/A	#N/A	#N/A	#N/A	#N/A	#N/A	#N/A	#N/A	#N/A	#N/A	#N/A	#N/A
FBgn0053428	5SrRNA:CR33428	-0.03	1	0	2.39	1	0	-0.06	1	0	#N/A	#N/A	#N/A	#N/A	#N/A	#N/A	#N/A	#N/A	#N/A	-0.19	1	0	0.51	0.96	0.0177288	1.66	1	0	-0.09	1	0	2.2	0.97	0.0132283	-0.03	1	0	-2.31	0.96	0.0177288	0.16	1	0	-2.3	1	0
FBgn0053432	5SrRNA:CR33432	#N/A	#N/A	#N/A	#N/A	#N/A	#N/A	#N/A	#N/A	#N/A	#N/A	#N/A	#N/A	#N/A	#N/A	#N/A	#N/A	#N/A	#N/A	-2.39	1	0	-2.36	0.96	0.0177288	0.16	1	0	#N/A	#N/A	#N/A	#N/A	#N/A	#N/A	#N/A	#N/A	#N/A	#N/A	#N/A	#N/A	#N/A	#N/A	#N/A	#N/A	#N/A	#N/A
FBgn0053439	5SrRNA:CR33439	1.66	1	0	1.76	1	0	0.74	1	0	-2.38	1	0	-2.27	0.9	0.0457575	-2.35	1	0	-0.12	1	0	-0.35	1	0	1.34	1	0	#N/A	#N/A	#N/A	#N/A	#N/A	#N/A	#N/A	#N/A	#N/A	#N/A	#N/A	#N/A	#N/A	#N/A	#N/A	#N/A	#N/A	#N/A
FBgn0053441	5SrRNA:CR33441	3.55	0.4	0.39794	3.9	0.5	0.30103	2.18	0.81	0.091515	-2.38	1	0	-0.00771	1	0	-0.1	1	0	-1.01	1	0	0.43	0.96	0.0177288	1.31	1	0	1.21	0.96	0.0177288	-2.47	0.96	0.0177288	1.28	0.94	0.0268721	2.26	0.96	0.0177288	3.31	0.98	0.00877392	3.17	1	0
FBgn0053442	5SrRNA:CR33442	2.31	1	0	1.78	1	0	0.73	1	0	#N/A	#N/A	#N/A	#N/A	#N/A	#N/A	#N/A	#N/A	#N/A	-0.78	1	0	0.6	0.96	0.0177288	1.73	1	0	#N/A	#N/A	#N/A	#N/A	#N/A	#N/A	#N/A	#N/A	#N/A	-0.03	1	0	2.45	1	0	-0.00902	1	0
FBgn0053443	5SrRNA:CR33443	4.07	1	0	3.76	1	0	2.27	1	0	#N/A	#N/A	#N/A	#N/A	#N/A	#N/A	#N/A	#N/A	#N/A	-0.23	1	0	0.71	0.96	0.0177288	1.38	1	0	#N/A	#N/A	#N/A	#N/A	#N/A	#N/A	#N/A	#N/A	#N/A	2.26	0.96	0.0177288	0.07	1	0	-0.00902	1	0
FBgn0053444	5SrRNA:CR33444	#N/A	#N/A	#N/A	#N/A	#N/A	#N/A	#N/A	#N/A	#N/A	#N/A	#N/A	#N/A	#N/A	#N/A	#N/A	#N/A	#N/A	#N/A	2.28	1	0	-0.04	1	0	2.48	1	0	#N/A	#N/A	#N/A	#N/A	#N/A	#N/A	#N/A	#N/A	#N/A	#N/A	#N/A	#N/A	#N/A	#N/A	#N/A	#N/A	#N/A	#N/A
FBgn0053449	5SrRNA:CR33449	-0.03	1	0	3.76	1	0	-0.06	1	0	#N/A	#N/A	#N/A	#N/A	#N/A	#N/A	#N/A	#N/A	#N/A	-3.24	1	0	-0.15	1	0	-0.69	1	0	#N/A	#N/A	#N/A	#N/A	#N/A	#N/A	#N/A	#N/A	#N/A	#N/A	#N/A	#N/A	#N/A	#N/A	#N/A	#N/A	#N/A	#N/A
FBgn0053452	5SrRNA:CR33452	2.28	1	0	0.13	1	0	-0.06	1	0	#N/A	#N/A	#N/A	#N/A	#N/A	#N/A	#N/A	#N/A	#N/A	-0.95	1	0	0.14	1	0	0.73	1	0	#N/A	#N/A	#N/A	#N/A	#N/A	#N/A	#N/A	#N/A	#N/A	#N/A	#N/A	#N/A	#N/A	#N/A	#N/A	#N/A	#N/A	#N/A
FBgn0053363	5SrRNA-Psi:CR33363	1.16	1	0	1.73	1	0	0.18	1	0	0.03	1	0	2.39	0.9	0.0457575	0.05	1	0	-0.99	1	0	0.32	1	0	1.08	1	0	-0.09	1	0	2.2	0.97	0.0132283	2.29	0.94	0.0268721	-0.03	1	0	3.31	0.98	0.00877392	2.32	1	0
FBgn0053416	5SrRNA-Psi:CR33416	-0.11	1	0	-3.11	1	0	-0.97	1	0	#N/A	#N/A	#N/A	#N/A	#N/A	#N/A	#N/A	#N/A	#N/A	-1.49	1	0	0.43	0.98	0.00877392	1.33	1	0	#N/A	#N/A	#N/A	#N/A	#N/A	#N/A	#N/A	#N/A	#N/A	-0.03	1	0	2.45	1	0	-0.00902	1	0
FBgn0041707	7B2	0.02	1	0	0.05	1	0	-0.00972	1	0	0.1	1	0	0.33	0.79	0.102373	-0.33	1	0	-0.02	1	0	-0.33	0.96	0.0177288	-0.08	1	0	-0.00999	1	0	-0.13	0.91	0.0409586	0.02	1	0	-0.13	0.97	0.0132283	-0.07	1	0	-0.01	1	0
FBgn0000003	7SLRNA:CR32864	0.14	1	0	0.21	1	0	-0.25	1	0	-0.29	1	0	0.32	0.9	0.0457575	0.01	1	0	-0.38	1	0	-0.36	0.95	0.0222764	0.08	1	0	-0.31	0.69	0.161151	-0.41	0.52	0.283997	0.00786	1	0	-0.05	1	0	0.51	0.16	0.79588	-0.13	1	0
FBgn0261504	7SLRNA:CR42652	0.14	1	0	0.21	1	0	-0.25	1	0	-0.29	1	0	0.32	0.9	0.0457575	0.01	1	0	-0.38	1	0	-0.36	0.95	0.0222764	0.08	1	0	-0.31	0.69	0.161151	-0.41	0.52	0.283997	0.00628	1	0	-0.05	1	0	0.51	0.15	0.823909	-0.14	1	0
FBgn0052208	825-Oak	0.45	1	0	-1.49	1	0	-1.07	1	0	#N/A	#N/A	#N/A	#N/A	#N/A	#N/A	#N/A	#N/A	#N/A	0.46	1	0	-0.77	0.96	0.0177288	-1.38	1	0	2.36	0.64	0.19382	2.35	0.7	0.154902	3.2	0.33	0.481486	0.62	0.96	0.0177288	1.62	0.51	0.29243	1.26	0.76	0.119186
FBgn0000008	a	-0.17	1	0	-0.62	1	0	0.37	0.93	0.0315171	-0.25	1	0	-0.22	0.8	0.09691	0.08	1	0	-0.1	1	0	-0.08	0.98	0.00877392	-0.14	1	0	0.01	1	0	0.02	1	0	-0.00205	1	0	0.03	1	0	-0.23	0.98	0.00877392	-0.3	0.82	0.0861861
FBgn0011293	a10	1.28	1	0	0.85	1	0	1.27	1	0	0.15	1	0	0.47	0.61	0.21467	-0.14	1	0	0.14	1	0	-0.33	0.96	0.0177288	-0.15	1	0	-0.04	1	0	0.02	1	0	-0.22	0.76	0.119186	0.13	0.96	0.0177288	0.35	0.61	0.21467	0.09	1	0
FBgn0028965	A16	-0.03	1	0	0.1	1	0	-0.03	1	0	-0.18	1	0	-0.33	0.69	0.161151	-0.1	1	0	-0.00101	1	0	0.16	0.96	0.0177288	0.21	1	0	0.05	1	0	-0.00347	1	0	-0.04	1	0	0.1	1	0	0.03	1	0	0.07	1	0
FBgn0052062	A2bp1	-0.1	1	0	-0.00663	1	0	0.02	1	0	0.11	1	0	0.41	0.47	0.327902	-0.03	1	0	-0.02	1	0	-0.13	0.96	0.0177288	-0.14	1	0	-0.12	0.89	0.05061	0.15	0.85	0.0705811	-0.22	0.54	0.267606	-0.03	1	0	-0.00382	1	0	-0.09	1	0
FBgn0011294	a5	#N/A	#N/A	#N/A	#N/A	#N/A	#N/A	#N/A	#N/A	#N/A	-0.81	1	0	-0.88	0.6	0.221849	-1.13	0.97	0.0132283	-0.33	1	0	-1.38	0.56	0.251812	-0.4	1	0	-0.98	0.06	1.22185	-0.77	0.27	0.568636	-0.81	0.18	0.744727	-0.65	0.67	0.173925	-0.31	1	0	-0.44	0.97	0.0132283
FBgn0023130	a6	-0.27	1	0	-0.14	1	0	-0.13	1	0	-0.1	1	0	-0.13	0.99	0.00436481	0.22	1	0	-0.04	1	0	0.11	0.99	0.00436481	-0.02	1	0	-0.22	0.83	0.0809219	-0.14	0.97	0.0132283	0.02	1	0	0.21	0.97	0.0132283	0.07	1	0	-0.1	1	0
FBgn0027885	Aac11	-0.14	1	0	-0.12	1	0	-0.13	1	0	0.19	1	0	0.18	0.84	0.0757207	0.07	1	0	0.07	1	0	0.02	1	0	-0.00026	1	0	-0.07	1	0	0.03	1	0	-0.12	0.87	0.0604807	0.15	0.9	0.0457575	-0.06	1	0	-0.07	1	0
FBgn0031791	AANATL2	0.33	1	0	0.2	1	0	-0.2	1	0	-0.93	1	0	-0.18	1	0	-0.61	1	0	-0.3	1	0	-0.36	0.97	0.0132283	0.06	1	0	-0.73	0.6	0.221849	-0.56	0.81	0.091515	-0.28	0.96	0.0177288	0.39	0.96	0.0177288	0.14	1	0	0.05	1	0
FBgn0031851	Aatf	-0.23	1	0	-0.08	1	0	-0.07	1	0	-0.05	1	0	-0.11	0.92	0.0362122	0.03	1	0	0.00542	1	0	0.07	0.99	0.00436481	-0.01	1	0	-0.24	0.8	0.09691	0.28	0.75	0.124939	-0.00501	1	0	0.44	0.73	0.136677	0.13	1	0	0.03	1	0
FBgn0027094	Aats-ala	-0.5	0.56	0.251812	-0.49	1	0	-0.52	0.35	0.455932	-0.16	1	0	-0.26	0.64	0.19382	-0.1	1	0	-0.35	1	0	-0.29	0.75	0.124939	-0.3	1	0	-0.4	0.07	1.1549	-0.23	0.61	0.21467	-0.24	0.49	0.309804	-0.14	0.98	0.00877392	-0.24	0.99	0.00436481	-0.39	0.64	0.19382
FBgn0028962	Aats-ala-m	-0.07	1	0	-0.02	1	0	-0.14	1	0	0.01	1	0	-0.1	0.98	0.00877392	0.03	1	0	0.01	1	0	0.03	1	0	0.05	1	0	-0.25	0.73	0.136677	-0.16	0.95	0.0222764	-0.3	0.59	0.229148	-0.04	1	0	-0.06	1	0	-0.07	1	0
FBgn0027093	Aats-arg	-0.25	1	0	-0.26	1	0	-0.25	1	0	0.05	1	0	-0.05	1	0	0.1	1	0	0.00518	1	0	0.09	0.96	0.0177288	0.08	1	0	-0.29	0.57	0.244125	-0.13	0.96	0.0177288	-0.23	0.73	0.136677	0.26	0.87	0.0604807	0.13	1	0	-0.05	1	0
FBgn0086443	Aats-asn	-0.15	1	0	-0.08	1	0	-0.09	1	0	0.12	1	0	0.02	1	0	0.21	1	0	-0.1	1	0	0.06	1	0	0.03	1	0	-0.04	1	0	0.08	0.98	0.00877392	0.17	0.77	0.113509	0.13	0.99	0.00436481	-0.04	1	0	0.03	1	0
FBgn0002069	Aats-asp	-0.09	1	0	-0.14	1	0	-0.03	1	0	-0.03	1	0	-0.03	1	0	0.03	1	0	0.07	1	0	0.03	1	0	0.02	1	0	-0.19	0.75	0.124939	-0.15	0.91	0.0409586	-0.32	0.35	0.455932	0.00853	1	0	-0.14	0.98	0.00877392	-0.07	1	0
FBgn0027091	Aats-cys	-0.18	1	0	-0.23	1	0	-0.29	0.97	0.0132283	0.01	1	0	-0.06	1	0	0.1	1	0	-0.07	1	0	0.03	1	0	0.02	1	0	0.02	1	0	0.16	0.92	0.0362122	0.16	0.9	0.0457575	0.2	0.94	0.0268721	-0.05	1	0	0.02	1	0
FBgn0027090	Aats-gln	-0.15	1	0	-0.12	1	0	-0.28	0.99	0.00436481	0.00177	1	0	-0.11	0.92	0.0362122	0.08	1	0	0.02	1	0	0.1	0.96	0.0177288	0.03	1	0	-0.17	0.88	0.0555173	-0.06	1	0	-0.08	1	0	0.08	1	0	-0.11	1	0	-0.08	1	0
FBgn0005674	Aats-glupro	-0.26	1	0	-0.29	1	0	-0.3	0.94	0.0268721	0.15	1	0	0.08	1	0	0.14	1	0	-0.02	1	0	-0.1	0.96	0.0177288	-0.06	1	0	-0.2	0.64	0.19382	0.07	1	0	-0.15	0.81	0.091515	-0.01	1	0	-0.03	1	0	-0.18	0.84	0.0757207
FBgn0027088	Aats-gly	-0.2	1	0	-0.11	1	0	-0.24	1	0	-0.02	1	0	-0.02	1	0	0.08	1	0	-0.08	1	0	-0.07	0.99	0.00436481	-0.08	1	0	-0.08	0.98	0.00877392	0.04	1	0	0.00368	1	0	0.08	1	0	-0.13	1	0	-0.1	1	0
FBgn0027087	Aats-his	0.06	1	0	-0.07	1	0	-0.13	1	0	-0.02	1	0	-0.02	1	0	0.09	1	0	-0.1	1	0	0.08	0.97	0.0132283	0.06	1	0	-0.14	0.94	0.0268721	-0.11	0.98	0.00877392	-0.05	1	0	0.04	1	0	0.02	1	0	-0.02	1	0
FBgn0027086	Aats-ile	-0.31	1	0	-0.18	1	0	-0.22	1	0	0.07	1	0	-0.08	1	0	0.11	1	0	-0.01	1	0	0.01	1	0	0.03	1	0	-0.17	0.76	0.119186	0.05	1	0	-0.14	0.85	0.0705811	0.12	0.94	0.0268721	-0.1	1	0	-0.06	1	0
FBgn0027085	Aats-leu	-0.29	1	0	-0.09	1	0	-0.36	0.97	0.0132283	-0.07	1	0	-0.21	0.8	0.09691	0.05	1	0	-0.07	1	0	0.14	0.96	0.0177288	0.04	1	0	-0.11	0.97	0.0132283	-0.02	1	0	0.02	1	0	0.05	1	0	-0.07	1	0	-0.12	1	0
FBgn0027084	Aats-lys	-0.16	1	0	-0.17	1	0	-0.23	1	0	-0.02	1	0	-0.11	0.95	0.0222764	0.06	1	0	0.03	1	0	0.09	0.96	0.0177288	0.05	1	0	-0.13	0.88	0.0555173	0.00585	1	0	-0.08	0.98	0.00877392	0.4	0.58	0.236572	0.09	1	0	0.05	1	0
FBgn0027083	Aats-met	0.17	1	0	-0.2	1	0	-0.16	1	0	-0.14	1	0	-0.28	0.78	0.107905	-0.00815	1	0	-0.02	1	0	0.21	0.96	0.0177288	-0.03	1	0	-0.01	1	0	-0.00947	1	0	-0.25	0.69	0.161151	0.2	0.97	0.0132283	-0.3	1	0	-0.26	1	0
FBgn0020766	Aats-phe	-0.12	1	0	-0.05	1	0	-0.1	1	0	0.13	1	0	-0.00229	1	0	-0.12	1	0	-0.07	1	0	-0.12	0.99	0.00436481	0.03	1	0	0.05	1	0	6.9e-05	1	0	-0.02	1	0	-0.05	1	0	-0.03	1	0	-0.05	1	0
FBgn0027082	Aats-pro	0.26	1	0	-0.11	1	0	-0.02	1	0	-0.05	1	0	-0.2	0.9	0.0457575	0.03	1	0	-0.08	1	0	0.09	1	0	-0.04	1	0	0.01	1	0	0.12	1	0	-0.21	0.89	0.05061	0.03	1	0	-0.31	1	0	-0.32	1	0
FBgn0021750	Aats-ser	-0.00156	1	0	-0.04	1	0	-0.07	1	0	-0.15	1	0	-0.2	0.86	0.0655015	0.05	1	0	0.13	1	0	0.28	0.96	0.0177288	0.16	1	0	-0.12	0.96	0.0177288	0.2	0.82	0.0861861	0.08	0.99	0.00436481	0.13	1	0	-0.00147	1	0	-0.1	1	0
FBgn0027081	Aats-thr	-0.16	1	0	-0.17	1	0	-0.18	1	0	0.07	1	0	-0.03	1	0	0.2	1	0	-0.04	1	0	0.04	1	0	0.06	1	0	-0.13	0.87	0.0604807	0.00636	1	0	-0.08	0.96	0.0177288	0.06	1	0	-0.05	1	0	-0.00801	1	0
FBgn0010803	Aats-trp	-0.07	1	0	-0.05	1	0	0.03	1	0	-0.04	1	0	-0.11	0.95	0.0222764	0.21	1	0	-0.09	1	0	0.12	0.96	0.0177288	0.01	1	0	-0.09	0.96	0.0177288	0.05	1	0	0.06	1	0	0.27	0.81	0.091515	0.22	0.98	0.00877392	0.25	0.91	0.0409586
FBgn0027080	Aats-tyr	-0.28	1	0	-0.11	1	0	-0.13	1	0	0.03	1	0	-0.01	1	0	0.11	1	0	0.02	1	0	-0.00505	1	0	0.02	1	0	-0.02	1	0	0.01	1	0	-0.13	0.87	0.0604807	-0.01	1	0	-0.04	1	0	-0.14	1	0
FBgn0035064	Aats-tyr-m	-0.00888	1	0	-0.19	1	0	-0.24	1	0	0.22	1	0	0.26	0.84	0.0757207	0.23	1	0	0.06	1	0	0.07	1	0	0.07	1	0	-0.03	1	0	0.19	0.96	0.0177288	-0.07	1	0	-0.02	1	0	-0.11	1	0	-0.08	1	0
FBgn0027079	Aats-val	-0.32	1	0	-0.2	1	0	-0.31	0.91	0.0409586	0.02	1	0	-0.07	1	0	0.09	1	0	0.00493	1	0	0.02	1	0	-0.00251	1	0	-0.12	0.92	0.0362122	0.04	1	0	-0.03	1	0	0.00161	1	0	-0.1	1	0	-0.12	1	0
FBgn0023129	aay	0.28	1	0	0.5	1	0	0.07	1	0	0.02	1	0	0.1	0.97	0.0132283	-0.14	1	0	0.37	1	0	0.34	0.6	0.221849	0.19	1	0	-0.39	0.25	0.60206	-0.61	0.02	1.69897	-0.02	1	0	0.2	0.92	0.0362122	0.03	1	0	0.26	0.89	0.05061
FBgn0264442	ab	-0.12	1	0	-0.22	1	0	0.03	1	0	0.35	1	0	0.6	0.62	0.207608	-0.09	1	0	-0.23	1	0	-0.33	0.96	0.0177288	-0.31	1	0	-0.07	1	0	-0.14	0.97	0.0132283	-0.27	0.73	0.136677	0.00426	1	0	-0.04	1	0	-0.13	1	0
FBgn0035244	ABCB7	-0.07	1	0	-0.17	1	0	-0.2	1	0	-0.05	1	0	-0.02	1	0	-0.00781	1	0	0.03	1	0	-0.16	0.96	0.0177288	-0.02	1	0	-0.12	0.92	0.0362122	-0.29	0.38	0.420216	-0.16	0.78	0.107905	-0.02	1	0	-0.18	0.87	0.0604807	0.02	1	0
FBgn0000014	abd-A	-0.18	1	0	-0.03	1	0	0.05	1	0	0.2	1	0	0.27	0.86	0.0655015	-0.17	1	0	-0.35	1	0	-0.48	0.96	0.0177288	-0.33	1	0	0.05	1	0	-0.1	1	0	0.00875	1	0	-0.27	0.94	0.0268721	-0.06	1	0	-0.33	0.95	0.0222764
FBgn0000015	Abd-B	-0.22	1	0	-0.13	1	0	-0.23	1	0	0.39	1	0	0.43	0.81	0.091515	0.15	1	0	-0.00371	1	0	-0.68	0.96	0.0177288	-0.37	1	0	-0.05	1	0	0.00545	1	0	-0.11	0.96	0.0177288	-0.29	0.91	0.0409586	-0.07	1	0	-0.23	1	0
FBgn0020510	Abi	-0.11	1	0	-0.06	1	0	-0.06	1	0	-0.13	1	0	-0.13	0.9	0.0457575	0.04	1	0	-0.06	1	0	0.09	0.96	0.0177288	0.02	1	0	0.04	1	0	0.06	1	0	0.08	0.97	0.0132283	0.1	1	0	-0.08	1	0	-0.07	1	0
FBgn0000017	Abl	-0.04	1	0	0.08	1	0	0.12	1	0	0.01	1	0	0.11	0.93	0.0315171	0.31	1	0	-0.00821	1	0	0.09	1	0	0.04	1	0	-0.05	1	0	0.00131	1	0	-0.04	1	0	0.08	1	0	0.08	1	0	-0.04	1	0
FBgn0000018	abo	-0.2	1	0	-0.07	1	0	-0.05	1	0	-0.33	1	0	-0.34	0.64	0.19382	0.03	1	0	0.19	1	0	0.24	0.96	0.0177288	0.19	1	0	0.15	0.96	0.0177288	0.02	1	0	0.29	0.68	0.167491	0.38	0.86	0.0655015	-0.00361	1	0	0.15	1	0
FBgn0036372	Abp1	0.54	0.5	0.30103	0.54	0.92	0.0362122	0.54	0.35	0.455932	0.6	0.14	0.853872	0.47	0.32	0.49485	0.81	0.00461	2.3363	0.7	0.00252	2.5986	0.85	2.67e-05	4.57349	0.76	0.000555	3.25571	0.72	0.00106	2.97469	0.75	0.000623	3.20551	0.69	0.00237	2.62525	0.98	5.24e-05	4.28067	0.6	0.08	1.09691	0.54	0.13	0.886057
FBgn0015331	abs	0.08	1	0	0.08	1	0	0.08	1	0	0.28	1	0	0.27	0.82	0.0861861	0.17	1	0	0.18	1	0	0.04	1	0	0.05	1	0	0.02	1	0	0.08	1	0	0.23	0.82	0.0861861	0.11	1	0	0.2	1	0	0.22	1	0
FBgn0000022	ac	-0.14	1	0	-0.22	1	0	-0.14	1	0	1.44	1	0	2.03	0.39	0.408935	0.76	1	0	0.46	1	0	-2.23	0.96	0.0177288	-0.55	1	0	#N/A	#N/A	#N/A	#N/A	#N/A	#N/A	#N/A	#N/A	#N/A	#N/A	#N/A	#N/A	#N/A	#N/A	#N/A	#N/A	#N/A	#N/A
FBgn0022710	Ac13E	-0.03	1	0	0.08	1	0	-0.03	1	0	0.22	1	0	0.47	0.47	0.327902	0.11	1	0	0.11	1	0	-0.41	0.96	0.0177288	-0.32	1	0	-0.02	1	0	-0.16	0.94	0.0268721	-0.27	0.7	0.154902	-0.15	0.96	0.0177288	0.13	1	0	-0.34	0.55	0.259637
FBgn0023416	Ac3	-0.05	1	0	-0.13	1	0	-0.18	1	0	0.26	1	0	0.41	0.6	0.221849	-0.19	1	0	0.12	1	0	-0.58	0.89	0.05061	-0.08	1	0	0.01	1	0	0.02	1	0	-0.12	0.96	0.0177288	-0.11	0.99	0.00436481	-0.04	1	0	-0.06	1	0
FBgn0004852	Ac76E	-0.73	0.54	0.267606	-0.6	1	0	-1.04	0.11	0.958607	0.19	1	0	0.4	0.49	0.309804	-0.01	1	0	0.09	1	0	-0.43	0.86	0.0655015	-0.09	1	0	-0.07	1	0	-0.23	0.58	0.236572	-0.12	0.88	0.0555173	-0.17	0.84	0.0757207	-0.14	0.97	0.0132283	-0.13	1	0
FBgn0024150	Ac78C	-0.38	1	0	-0.05	1	0	-0.25	1	0	0.4	1	0	0.41	0.68	0.167491	0.39	1	0	0.4	1	0	-0.28	0.96	0.0177288	0.01	1	0	-0.06	1	0	-0.18	0.84	0.0757207	-0.23	0.64	0.19382	-0.05	1	0	-0.24	0.96	0.0177288	-0.19	1	0
FBgn0011273	Acam	0.98	0.43	0.366532	0.65	1	0	0.89	0.37	0.431798	0.00581	1	0	1.36	0.9	0.0457575	-2.35	1	0	#N/A	#N/A	#N/A	#N/A	#N/A	#N/A	#N/A	#N/A	#N/A	0.11	0.96	0.0177288	0.33	0.54	0.267606	0.35	0.39	0.408935	0.12	0.96	0.0177288	0.22	0.68	0.167491	0.36	0.12	0.920819
FBgn0033246	ACC	-0.67	0.34	0.468521	-0.55	0.97	0.0132283	-0.62	0.26	0.585027	0.23	1	0	0.33	0.72	0.142668	0.03	1	0	-0.34	1	0	-0.53	0.38	0.420216	-0.28	1	0	-0.13	0.96	0.0177288	-0.31	0.61	0.21467	-0.05	1	0	-0.47	0.09	1.04576	-0.16	1	0	-0.19	0.95	0.0222764
FBgn0012034	AcCoAS	-0.15	1	0	0.11	1	0	-0.48	0.66	0.180456	0.26	1	0	0.31	0.59	0.229148	-0.08	1	0	-0.11	1	0	-0.28	0.96	0.0177288	-0.12	1	0	-0.02	1	0	-0.33	0.56	0.251812	-0.11	0.97	0.0132283	-0.35	0.31	0.508638	-0.27	0.66	0.180456	-0.2	0.87	0.0604807
FBgn0000024	Ace	-0.27	1	0	-0.21	1	0	-0.2	1	0	0.39	1	0	0.66	0.18	0.744727	-0.04	1	0	0.13	1	0	-0.13	0.98	0.00877392	-0.16	1	0	0.0025	1	0	0.06	1	0	-0.18	0.71	0.148742	0.09	0.96	0.0177288	-0.02	1	0	-0.06	1	0
FBgn0016122	Acer	-0.06	1	0	-0.14	1	0	-0.17	1	0	-0.09	1	0	0.11	0.96	0.0177288	0.15	1	0	-0.15	1	0	-0.11	0.96	0.0177288	-0.15	1	0	-0.14	0.82	0.0861861	-0.27	0.43	0.366532	-0.03	1	0	-0.24	0.92	0.0362122	-0.52	0.35	0.455932	-0.57	0.22	0.657577
FBgn0027620	Acf1	-0.04	1	0	0.08	1	0	-0.1	1	0	0.14	1	0	-0.09	1	0	0.14	1	0	0.48	1	0	0.59	0.11	0.958607	0.06	1	0	0.03	1	0	0.08	1	0	0.07	1	0	0.74	0.04	1.39794	0.29	0.92	0.0362122	0.00139	1	0
FBgn0033749	achi	0.39	1	0	0.42	1	0	0.37	1	0	0.07	1	0	-0.05	1	0	0.14	1	0	0.12	1	0	0.1	1	0	-0.05	1	0	0.41	0.24	0.619789	0.19	0.87	0.0604807	0.19	0.82	0.0861861	0.05	1	0	0.07	1	0	0.02	1	0
FBgn0000028	acj6	0.04	1	0	0.03	1	0	0.08	1	0	-0.08	1	0	-0.22	1	0	-0.51	1	0	-0.16	1	0	0.61	0.96	0.0177288	0.3	1	0	0.38	0.8	0.09691	0.39	0.84	0.0757207	0.27	0.93	0.0315171	0.22	1	0	0.22	1	0	0.05	1	0
FBgn0028484	Ack	0.01	1	0	0.09	1	0	0.05	1	0	-0.07	1	0	-0.00689	1	0	0.05	1	0	-0.00648	1	0	0.04	1	0	0.01	1	0	0.17	0.76	0.119186	0.25	0.52	0.283997	0.16	0.78	0.107905	0.06	1	0	0.12	1	0	0.2	0.73	0.136677
FBgn0263998	Ack-like	-0.1	1	0	-0.19	1	0	0.00622	1	0	-0.1	1	0	-0.06	1	0	0.05	1	0	-0.1	1	0	-0.07	1	0	-0.08	1	0	0.06	1	0	-0.11	0.97	0.0132283	-0.09	0.98	0.00877392	-0.00948	1	0	-0.19	0.98	0.00877392	-0.07	1	0
FBgn0263198	Acn	-0.16	1	0	-0.05	1	0	-0.16	1	0	0.06	1	0	0.01	1	0	0.02	1	0	0.01	1	0	0.05	1	0	0.07	1	0	0.01	1	0	0.08	0.99	0.00436481	0.02	1	0	0.09	0.96	0.0177288	-0.09	1	0	-0.06	1	0
FBgn0010100	Acon	-0.27	1	0	-0.14	1	0	-0.57	0.5	0.30103	0.12	1	0	0.53	0.45	0.346787	-0.28	1	0	-0.1	1	0	-0.57	0.44	0.356547	-0.25	1	0	0.18	0.91	0.0409586	0.08	1	0	-0.16	0.92	0.0362122	-0.17	0.93	0.0315171	0.16	1	0	0.04	1	0
FBgn0034629	Acox57D-d	-0.79	0.82	0.0861861	-1.65	0.09	1.04576	-1.39	0.12	0.920819	0.07	1	0	-0.22	0.75	0.124939	0.13	1	0	-0.16	1	0	-0.22	0.92	0.0362122	-0.03	1	0	-0.02	1	0	-0.32	0.6	0.221849	-0.25	0.73	0.136677	-0.04	1	0	-0.71	0.03	1.52288	-0.5	0.27	0.568636
FBgn0034628	Acox57D-p	0.12	1	0	0.34	1	0	-0.33	1	0	0.16	1	0	-0.05	1	0	0.13	1	0	0.08	1	0	0.03	1	0	-0.01	1	0	0.31	0.49	0.309804	-0.06	1	0	0.15	0.9	0.0457575	0.25	0.82	0.0861861	-0.02	1	0	-0.04	1	0
FBgn0014454	Acp1	-7.05	0.42	0.376751	-6.89	0.78	0.107905	-4.72	0.13	0.886057	-1.45	0.54	0.267606	2.01	0.02	1.69897	-2.47	0.02	1.69897	-5.57	1	0	-1.3	0.96	0.0177288	-5.41	1	0	-2.16	8.23e-11	10.0846	0.47	0.59	0.229148	-2.14	2.02e-10	9.69465	-1.04	0.77	0.113509	2.66	0.00181	2.74232	1.95	0.07	1.1549
FBgn0051779	Acp24A4	-0.15	1	0	-0.91	1	0	-1.34	0.96	0.0177288	0.00253	1	0	0.52	1	0	-0.12	1	0	-0.07	1	0	5.76	0.78	0.107905	4.82	1	0	-0.58	0.00163	2.78781	-0.49	0.02	1.69897	-0.47	0.02	1.69897	-0.3	0.77	0.113509	-0.24	0.95	0.0222764	-0.23	0.99	0.00436481
FBgn0002855	Acp26Aa	0.18	1	0	-2.67	0.83	0.0809219	-1.09	0.9	0.0457575	-0.21	1	0	-0.04	1	0	0.85	1	0	2.28	1	0	-0.04	1	0	0.08	1	0	-0.14	0.93	0.0315171	-0.44	0.22	0.657577	-0.17	0.87	0.0604807	-0.39	0.53	0.275724	-0.36	0.64	0.19382	-0.15	1	0
FBgn0002856	Acp26Ab	-0.11	1	0	0.52	1	0	-0.12	1	0	4.18	1	0	3.23	0.84	0.0757207	3.14	1	0	-0.07	1	0	2.18	0.96	0.0177288	0.08	1	0	-0.07	0.99	0.00436481	-0.19	0.72	0.142668	-0.00624	1	0	-0.31	0.26	0.585027	-0.23	0.65	0.187087	-0.2	0.73	0.136677
FBgn0015583	Acp29AB	1.28	1	0	0.00674	1	0	-2.45	1	0	-3.23	1	0	-0.86	0.99	0.00436481	-3.2	1	0	#N/A	#N/A	#N/A	#N/A	#N/A	#N/A	#N/A	#N/A	#N/A	0.02	1	0	-0.21	0.86	0.0655015	-0.11	0.97	0.0132283	-0.4	0.46	0.337242	-0.4	0.49	0.309804	-0.33	0.67	0.173925
FBgn0023415	Acp32CD	-0.47	1	0	-2.89	1	0	0.02	1	0	-1.22	1	0	-2.09	0.72	0.142668	-0.81	1	0	-0.07	1	0	2.18	0.96	0.0177288	0.08	1	0	-0.24	0.5	0.30103	-0.37	0.14	0.853872	-0.09	0.95	0.0222764	-0.28	0.36	0.443697	-0.29	0.35	0.455932	-0.29	0.32	0.49485
FBgn0267327	Acp33A	-0.42	1	0	0.23	1	0	-0.81	1	0	-1.77	1	0	-0.95	0.9	0.0457575	-0.51	1	0	-2.39	1	0	-2.36	0.96	0.0177288	-2.24	1	0	-0.09	1	0	-0.2	0.88	0.0555173	0.01	1	0	-0.56	0.22	0.657577	0.04	1	0	0.04	1	0
FBgn0011559	Acp36DE	0.28	1	0	-0.09	1	0	-0.21	1	0	-0.53	1	0	0.0038	1	0	0.22	1	0	0.82	1	0	1.22	0.96	0.0177288	0.16	1	0	0.24	0.77	0.113509	-0.31	0.66	0.180456	0.13	0.95	0.0222764	-0.35	0.5	0.30103	-0.27	0.8	0.09691	-0.07	1	0
FBgn0034152	Acp53C14a	0.4	1	0	-0.37	1	0	0.69	1	0	-1.1	1	0	-0.88	0.84	0.0757207	-0.41	1	0	-0.07	1	0	-0.04	1	0	4.23	1	0	0.01	1	0	-0.27	0.7	0.154902	0.03	1	0	-0.34	0.14	0.853872	-0.11	1	0	-0.04	1	0
FBgn0034153	Acp53C14b	0.51	1	0	-1.93	1	0	0.11	1	0	0.00182	1	0	0.1	1	0	-1.78	1	0	-0.07	1	0	3.54	0.96	0.0177288	2.48	1	0	-0.08	1	0	-0.35	0.48	0.318759	0.00694	1	0	-0.29	0.3	0.522879	-0.21	0.71	0.148742	-0.07	1	0
FBgn0053530	Acp53C14c	-1.03	1	0	-4.03	1	0	-1.89	0.92	0.0362122	-0.4	1	0	-5.01	0.6	0.221849	-1.08	1	0	1.19	1	0	-0.15	1	0	0.17	1	0	-0.26	0.72	0.142668	-0.58	0.08	1.09691	-0.09	1	0	-0.38	0.61	0.21467	-0.19	1	0	-0.23	1	0
FBgn0015584	Acp53Ea	1.74	0.93	0.0315171	0.65	1	0	1.37	0.95	0.0222764	0.31	1	0	0.52	1	0	0.18	1	0	3.67	1	0	-0.04	1	0	0.08	1	0	-0.05	1	0	-0.26	0.77	0.113509	0.03	1	0	-0.4	0.04	1.39794	-0.23	0.61	0.21467	-0.04	1	0
FBgn0083936	Acp54A1	-0.66	1	0	-1.56	1	0	-1.66	0.58	0.236572	0.14	1	0	-0.04	1	0	0.13	1	0	-0.88	1	0	-0.15	1	0	-0.69	1	0	0.34	0.58	0.236572	-0.5	0.28	0.552842	0.37	0.48	0.318759	-0.29	0.32	0.49485	0.26	0.47	0.327902	0.03	1	0
FBgn0020509	Acp62F	-1.88	1	0	0.94	1	0	-1.04	1	0	0.00246	1	0	-0.95	0.92	0.0362122	-0.12	1	0	2.28	1	0	-0.04	1	0	2.48	1	0	-0.16	0.78	0.107905	-0.39	0.09	1.04576	-0.15	0.8	0.09691	-0.42	0.04	1.39794	-0.08	1	0	-0.00349	1	0
FBgn0015585	Acp63F	0.26	1	0	-2.19	0.47	0.327902	-0.03	1	0	0.00221	1	0	-0.72	0.94	0.0268721	0.69	1	0	4.06	1	0	-0.04	1	0	3.87	1	0	-0.14	0.93	0.0315171	-0.54	0.07	1.1549	-0.23	0.72	0.142668	-0.49	0.0073	2.13668	-0.33	0.23	0.638272	-0.03	1	0
FBgn0020765	Acp65Aa	2.02	1	0	1.82	1	0	1.25	1	0	-1.24	1	0	2.8	0.000587	3.23136	-1.89	0.62	0.207608	-0.99	1	0	-0.16	1	0	-0.14	1	0	-0.1	1	0	0.96	0.74	0.130768	-2.34	0.28	0.552842	-1.87	0.4	0.39794	1.02	0.64	0.19382	-0.4	1	0
FBgn0015586	Acp76A	1.79	1	0	-0.55	1	0	-1.5	1	0	-1.48	1	0	-1.5	0.8	0.09691	0.09	1	0	-2.39	1	0	-2.36	0.96	0.0177288	-2.24	1	0	-0.27	0.67	0.173925	-0.47	0.22	0.657577	-0.37	0.37	0.431798	-0.52	0.26	0.585027	-0.36	0.71	0.148742	-0.15	1	0
FBgn0002863	Acp95EF	0.22	1	0	-0.48	1	0	0.28	1	0	-0.28	1	0	-0.48	0.98	0.00877392	0.11	1	0	-2.39	1	0	-2.36	0.96	0.0177288	-2.24	1	0	-0.07	1	0	-0.23	0.84	0.0757207	0.00345	1	0	-0.19	0.88	0.0555173	-0.02	1	0	0.02	1	0
FBgn0263597	Acp98AB	-0.8	1	0	-0.71	1	0	-2.19	0.82	0.0861861	-0.69	1	0	-1.25	0.85	0.0705811	-2.18	1	0	-0.04	1	0	-2.36	0.96	0.0177288	-2.24	1	0	0.3	0.71	0.148742	-0.06	1	0	0.25	0.81	0.091515	-0.54	0.00142	2.84771	-0.04	1	0	-0.00382	1	0
FBgn0000032	Acph-1	-0.07	1	0	-0.07	1	0	-0.14	1	0	-0.08	1	0	-0.38	0.47	0.327902	0.11	1	0	-0.17	1	0	0.04	1	0	0.0087	1	0	0.05	1	0	0.05	1	0	0.00582	1	0	0.43	0.4	0.39794	0.11	1	0	0.02	1	0
FBgn0263120	Acsl	-0.6	0.5	0.30103	-0.56	1	0	-0.63	0.29	0.537602	0.14	1	0	0.05	1	0	-0.09	1	0	-0.19	1	0	-0.18	0.96	0.0177288	-0.11	1	0	-0.12	0.96	0.0177288	-0.28	0.68	0.167491	-0.03	1	0	-0.36	0.3	0.522879	-0.44	0.12	0.920819	-0.32	0.42	0.376751
FBgn0000043	Act42A	-0.29	1	0	-0.4	1	0	-0.28	1	0	0.0012	1	0	-0.11	0.93	0.0315171	-0.02	1	0	0.05	1	0	0.03	1	0	0.00681	1	0	0.17	0.74	0.130768	0.11	0.93	0.0315171	0.12	0.89	0.05061	0.36	0.44	0.356547	0.37	0.43	0.366532	0.32	0.54	0.267606
FBgn0000044	Act57B	-0.64	1	0	0.06	1	0	-1.75	0.06	1.22185	-0.5	0.69	0.161151	0.59	0.21	0.677781	-0.69	0.12	0.920819	-0.09	1	0	-0.84	0.07	1.1549	-0.34	1	0	-0.92	0.000155	3.80967	-0.3	0.68	0.167491	-1.28	3.37e-09	8.47237	-0.1	0.96	0.0177288	0.06	1	0	0.03	1	0
FBgn0000042	Act5C	-0.17	1	0	-0.27	1	0	-0.15	1	0	0.1	1	0	0.1	1	0	0.19	1	0	-0.04	1	0	-0.09	1	0	0.02	1	0	0.19	0.86	0.0655015	0.1	1	0	-0.05	1	0	0.08	0.97	0.0132283	-0.03	1	0	0.00935	1	0
FBgn0000045	Act79B	-0.45	1	0	-0.35	1	0	-0.19	1	0	-0.8	0.03	1.52288	0.73	0.07	1.1549	-1.08	0.000214	3.66959	0.04	1	0	-0.62	0.65	0.187087	-0.3	1	0	-0.5	0.17	0.769551	-0.05	1	0	-0.89	0.000473	3.32514	-0.17	0.92	0.0362122	0.65	0.00247	2.6073	0.52	0.04	1.39794
FBgn0000046	Act87E	-0.48	1	0	-0.27	1	0	-0.87	0.24	0.619789	-0.26	1	0	0.85	0.03	1.52288	-0.33	1	0	0.02	1	0	-0.48	0.75	0.124939	-0.11	1	0	-0.15	0.93	0.0315171	0.16	0.92	0.0362122	-0.29	0.57	0.244125	-0.0086	1	0	0.16	1	0	0.14	1	0
FBgn0000047	Act88F	-0.87	1	0	-0.51	1	0	-0.46	1	0	-1.58	1.75e-05	4.75696	0.97	0.07	1.1549	-2.69	0	#NUM!	-0.7	1	0	-1.38	0.00465	2.33255	-0.59	1	0	-1.46	9.81e-10	9.00833	0.17	0.96	0.0177288	-2.85	0	#NUM!	-0.2	0.92	0.0362122	1.3	3.52e-10	9.45346	1.14	1.28e-07	6.89279
FBgn0024913	Actbeta	-0.11	1	0	0.05	1	0	0.06	1	0	0.34	1	0	0.45	0.53	0.275724	-0.29	1	0	0.12	1	0	-0.27	0.96	0.0177288	-0.27	1	0	-0.11	0.94	0.0268721	0.07	1	0	-0.04	1	0	-0.17	0.96	0.0177288	-0.2	1	0	-0.21	1	0
FBgn0000667	Actn	-0.49	1	0	-0.11	1	0	-0.97	0.22	0.657577	-0.28	1	0	0.37	0.47	0.327902	-0.24	1	0	-0.1	1	0	-0.15	0.96	0.0177288	-0.15	1	0	-0.48	0.03	1.52288	0.01	1	0	-0.61	0.0017	2.76955	-0.07	1	0	0.44	0.19	0.721246	0.33	0.45	0.346787
FBgn0015008	Actn3	0.88	0.59	0.229148	0.65	1	0	1.05	0.26	0.585027	-3.23	1	0	-3.13	0.84	0.0757207	-0.11	1	0	-0.04	1	0	1.22	0.96	0.0177288	-2.24	1	0	0.45	0.1	1	0.35	0.4	0.39794	0.49	0.06	1.22185	0.18	0.92	0.0362122	0.14	1	0	0.35	0.44	0.356547
FBgn0040510	ACXA	0.91	0.56	0.251812	0.92	1	0	1.16	0.19	0.721246	2.41	1	0	0.13	1	0	0.05	1	0	-2.39	1	0	-0.14	1	0	-2.24	1	0	0.27	0.51	0.29243	0.36	0.29	0.537602	0.39	0.15	0.823909	0.11	1	0	0.22	1	0	0.32	0.88	0.0555173
FBgn0040509	ACXB	0.61	1	0	0.59	1	0	0.82	0.65	0.187087	0.03	1	0	2.39	0.9	0.0457575	2.31	1	0	-0.07	1	0	2.18	0.96	0.0177288	0.08	1	0	0.31	0.47	0.327902	0.32	0.5	0.30103	0.49	0.09	1.04576	0.47	0.81	0.091515	0.6	0.63	0.200659	0.75	0.34	0.468521
FBgn0040508	ACXC	0.93	0.45	0.346787	0.73	1	0	0.99	0.25	0.60206	-1.16	1	0	-4.82	0.63	0.200659	-2.65	1	0	-3.77	1	0	-0.68	1	0	0.17	1	0	0.24	0.69	0.161151	0.22	0.79	0.102373	0.38	0.3	0.522879	0.26	0.47	0.327902	0.29	0.4	0.39794	0.41	0.06	1.22185
FBgn0040507	ACXD	-0.12	1	0	-0.2	1	0	-0.51	0.92	0.0362122	0.33	1	0	0.68	0.29	0.537602	-0.04	1	0	0.03	1	0	-0.33	0.96	0.0177288	-0.34	1	0	-0.06	1	0	-0.1	1	0	0.1	1	0	-0.27	0.78	0.107905	-0.27	0.83	0.0809219	-0.34	0.58	0.236572
FBgn0040506	ACXE	0.82	1	0	1.02	1	0	1.15	0.43	0.366532	#N/A	#N/A	#N/A	#N/A	#N/A	#N/A	#N/A	#N/A	#N/A	-0.07	1	0	2.18	0.96	0.0177288	0.08	1	0	0.05	1	0	0.37	0.74	0.130768	0.54	0.33	0.481486	0.4	0.92	0.0362122	0.07	1	0	0.26	1	0
FBgn0025115	Acyp	1.4	0.38	0.420216	1.05	1	0	1.66	0.13	0.886057	2.41	1	0	2.39	0.9	0.0457575	0.05	1	0	#N/A	#N/A	#N/A	#N/A	#N/A	#N/A	#N/A	#N/A	#N/A	0.45	0.08	1.09691	0.6	0.00675	2.1707	0.54	0.02	1.69897	0.64	0.04	1.39794	0.74	0.01	2	0.92	0.000428	3.36856
FBgn0038363	Acyp2	0.26	1	0	0.26	1	0	0.4	0.94	0.0268721	-0.04	1	0	-0.16	0.91	0.0409586	-0.15	1	0	0.06	1	0	0.15	0.96	0.0177288	0.16	1	0	0.17	0.89	0.05061	0.23	0.82	0.0861861	0.27	0.69	0.161151	0.08	1	0	0.16	1	0	0.15	1	0
FBgn0037661	Ada	0.11	1	0	0.27	1	0	0.02	1	0	0.16	1	0	-0.34	0.84	0.0757207	0.27	1	0	0.39	1	0	0.7	0.7	0.154902	0.18	1	0	-0.03	1	0	0.02	1	0	-0.09	1	0	0.39	0.94	0.0268721	-0.1	1	0	0.09	1	0
FBgn0051865	Ada1-1	1.15	0.58	0.236572	1.26	0.92	0.0362122	0.87	0.74	0.130768	0.59	1	0	0.56	0.73	0.136677	0.77	1	0	0.88	1	0	1.05	0.29	0.537602	1.51	0.02	1.69897	-0.43	0.96	0.0177288	0.39	0.97	0.0132283	0.11	1	0	1.87	0.07	1.1549	0.98	0.78	0.107905	1.31	0.42	0.376751
FBgn0051866	Ada1-2	-0.42	1	0	-0.29	1	0	-0.07	1	0	-0.33	1	0	-0.42	0.62	0.207608	-0.02	1	0	-0.17	1	0	0.11	1	0	-0.21	1	0	0.07	1	0	0.09	1	0	-0.01	1	0	-0.07	1	0	-0.07	1	0	-0.26	1	0
FBgn0263738	Ada2a	-0.06	1	0	0.00235	1	0	-0.09	1	0	0.26	1	0	0.12	1	0	0.36	1	0	-0.03	1	0	0.15	1	0	-0.00626	1	0	-0.06	1	0	-0.06	1	0	0.1	1	0	-0.03	1	0	-0.21	1	0	-0.11	1	0
FBgn0037555	Ada2b	-0.02	1	0	0.01	1	0	-0.04	1	0	-0.22	1	0	-0.41	0.45	0.346787	0.06	1	0	-0.03	1	0	0.09	0.98	0.00877392	0.01	1	0	-0.06	1	0	0.01	1	0	-0.04	1	0	0.27	0.88	0.0555173	-0.15	1	0	-0.18	1	0
FBgn0027619	Adam	-0.16	1	0	-0.12	1	0	-0.14	1	0	0.00434	1	0	0.02	1	0	0.02	1	0	-0.02	1	0	0.09	0.96	0.0177288	0.05	1	0	-0.11	0.94	0.0268721	0.0061	1	0	-0.11	0.9	0.0457575	0.02	1	0	-0.08	1	0	0.01	1	0
FBgn0038341	AdamTS-A	-0.09	1	0	-0.15	1	0	0.14	1	0	0.19	1	0	0.5	0.33	0.481486	-0.05	1	0	0.21	1	0	-0.25	0.96	0.0177288	-0.01	1	0	-0.32	0.21	0.677781	0.14	0.87	0.0604807	-0.14	0.85	0.0705811	-0.3	0.68	0.167491	-0.22	0.93	0.0315171	-0.29	0.72	0.142668
FBgn0026086	Adar	-0.18	1	0	0.01	1	0	-0.11	1	0	0.11	1	0	0.26	0.71	0.148742	-0.06	1	0	0.08	1	0	0.11	0.96	0.0177288	0.02	1	0	-0.11	0.92	0.0362122	0.05	1	0	-0.14	0.82	0.0861861	-0.06	1	0	0.03	1	0	-0.05	1	0
FBgn0028658	adat	-0.12	1	0	-0.23	1	0	-0.01	1	0	0.02	1	0	0.23	0.9	0.0457575	0.07	1	0	-0.02	1	0	0.00804	1	0	-0.15	1	0	-0.22	0.95	0.0222764	0.17	0.98	0.00877392	0.07	1	0	-0.13	1	0	-0.22	1	0	-0.46	0.99	0.00436481
FBgn0026573	ADD1	-0.09	1	0	-0.02	1	0	-0.05	1	0	-0.16	1	0	-0.31	0.63	0.200659	0.05	1	0	-0.09	1	0	0.09	0.99	0.00436481	-0.1	1	0	0.18	0.73	0.136677	0.09	0.97	0.0132283	0.16	0.78	0.107905	0.24	0.92	0.0362122	-0.03	1	0	0.06	1	0
FBgn0000052	ade2	0.06	1	0	0.18	1	0	-0.14	1	0	0.07	1	0	0.08	0.99	0.00436481	0.08	1	0	0.18	1	0	0.15	0.96	0.0177288	0.09	1	0	-0.42	0.24	0.619789	-0.08	1	0	-0.19	0.83	0.0809219	0.24	0.92	0.0362122	0.52	0.37	0.431798	0.5	0.38	0.420216
FBgn0000053	ade3	-0.14	1	0	0.05	1	0	-0.12	1	0	0.19	1	0	0.22	0.79	0.102373	0.07	1	0	0.28	1	0	0.16	0.96	0.0177288	0.18	1	0	-0.27	0.68	0.167491	-0.32	0.61	0.21467	-0.25	0.71	0.148742	0.34	0.87	0.0604807	1	0.01	2	0.84	0.07	1.1549
FBgn0020513	ade5	0.25	1	0	0.37	1	0	0.19	1	0	0.28	1	0	0.15	0.9	0.0457575	-0.05	1	0	0.04	1	0	0.05	1	0	-0.04	1	0	-0.39	0.31	0.508638	-0.43	0.27	0.568636	-0.22	0.77	0.113509	0.04	1	0	0.26	0.49	0.309804	0.34	0.16	0.79588
FBgn0036337	AdenoK	-0.26	1	0	-0.04	1	0	-0.2	1	0	-0.11	1	0	0.07	1	0	-0.05	1	0	-0.23	1	0	-0.03	1	0	-0.1	1	0	-0.21	0.62	0.207608	-0.19	0.74	0.130768	-0.23	0.52	0.283997	-0.22	0.62	0.207608	-0.25	0.56	0.251812	-0.29	0.35	0.455932
FBgn0000054	Adf1	-0.28	1	0	-0.02	1	0	-0.01	1	0	-0.11	1	0	-0.12	0.92	0.0362122	0.08	1	0	-0.04	1	0	0.12	0.96	0.0177288	0.03	1	0	-0.06	1	0	-0.17	0.93	0.0315171	-0.12	0.96	0.0177288	-0.00283	1	0	0.03	1	0	-0.08	1	0
FBgn0036752	Adgf-A	-0.74	0.5	0.30103	-0.74	0.96	0.0177288	-0.87	0.21	0.677781	0.3	1	0	0.23	0.81	0.091515	0.01	1	0	0.08	1	0	-0.48	0.79	0.102373	-0.06	1	0	-0.05	1	0	0.06	1	0	0.00477	1	0	-0.08	1	0	-0.1	1	0	-0.15	1	0
FBgn0036751	Adgf-B	1.25	0.18	0.744727	0.57	1	0	1.13	0.16	0.79588	0.00356	1	0	-0.86	1	0	-3.2	1	0	-2.39	1	0	-0.14	1	0	0.16	1	0	0.04	1	0	0.26	0.55	0.259637	0.25	0.46	0.337242	0.09	1	0	0.27	0.87	0.0604807	0.36	0.58	0.236572
FBgn0038173	Adgf-C	0.41	1	0	0.48	1	0	0.53	1	0	0.17	1	0	0.35	0.9	0.0457575	-0.06	1	0	-0.05	1	0	-0.19	1	0	-0.31	1	0	-0.03	1	0	-0.35	0.59	0.229148	-0.19	0.87	0.0604807	-0.19	0.98	0.00877392	-0.2	1	0	-0.13	1	0
FBgn0038172	Adgf-D	-0.1	1	0	0.34	1	0	-0.05	1	0	-0.32	1	0	-0.06	1	0	-0.76	0.13	0.886057	-0.28	1	0	-0.41	0.92	0.0362122	-0.33	1	0	-0.02	1	0	0.18	0.79	0.102373	-0.09	0.96	0.0177288	0.03	1	0	0.12	1	0	0.09	1	0
FBgn0033952	Adgf-E	0.83	0.67	0.173925	0.47	1	0	0.78	0.56	0.251812	-2.38	1	0	-0.00771	1	0	1.27	1	0	-0.04	1	0	-0.14	1	0	-2.24	1	0	0.23	0.76	0.119186	0.3	0.64	0.19382	0.32	0.49	0.309804	0.05	1	0	0.24	0.97	0.0132283	0.33	0.74	0.130768
FBgn0000055	Adh	0.2	1	0	0.18	1	0	-0.7	0.75	0.124939	0.48	0.99	0.00436481	0.51	0.44	0.356547	0.1	1	0	0.08	1	0	-0.03	1	0	0.02	1	0	-0.1	1	0	-0.32	0.68	0.167491	-0.15	0.94	0.0268721	0.18	0.92	0.0362122	0.32	0.55	0.259637	0.22	0.87	0.0604807
FBgn0000056	Adhr	-0.03	1	0	0.25	1	0	-0.8	0.68	0.167491	0.69	0.38	0.420216	0.5	0.5	0.30103	0.14	1	0	0.07	1	0	-0.12	0.96	0.0177288	-0.01	1	0	0.04	1	0	0.06	1	0	-0.00379	1	0	-0.54	0.16	0.79588	0.12	1	0	0.28	0.85	0.0705811
FBgn0038984	AdipoR	0.33	1	0	0.29	1	0	0.17	1	0	0.12	1	0	0.1	0.97	0.0132283	-0.05	1	0	-0.12	1	0	-0.18	0.96	0.0177288	-0.07	1	0	0.07	1	0	0.03	1	0	0.06	1	0	-0.14	0.91	0.0409586	-0.2	0.75	0.124939	-0.04	1	0
FBgn0022709	Adk1	0.08	1	0	0.07	1	0	0.1	1	0	-0.06	1	0	0.39	0.49	0.309804	-0.53	0.44	0.356547	-0.07	1	0	-0.35	0.91	0.0409586	-0.12	1	0	-0.2	0.63	0.200659	0.07	1	0	-0.2	0.59	0.229148	-0.01	1	0	0.07	1	0	0.19	0.77	0.113509
FBgn0022708	Adk2	-0.52	0.86	0.0655015	-0.5	1	0	-0.63	0.46	0.337242	0.03	1	0	0.02	1	0	0.06	1	0	0.02	1	0	0.04	1	0	0.04	1	0	-0.06	1	0	0.09	0.97	0.0132283	-0.11	0.93	0.0315171	-0.02	1	0	-0.02	1	0	-0.12	1	0
FBgn0042094	Adk3	0.1	1	0	0.00516	1	0	0.01	1	0	0.14	1	0	0.06	1	0	-0.07	1	0	0.07	1	0	0.09	1	0	0.15	1	0	0.11	0.96	0.0177288	0.21	0.82	0.0861861	0.25	0.64	0.19382	0.21	0.67	0.173925	0.22	0.69	0.161151	0.33	0.2	0.69897
FBgn0039747	AdoR	-0.64	0.77	0.113509	-0.55	1	0	-0.4	0.99	0.00436481	0.13	1	0	0.65	0.59	0.229148	-0.12	1	0	-0.08	1	0	-0.4	0.96	0.0177288	-0.09	1	0	0.28	0.8	0.09691	0.35	0.73	0.136677	0.46	0.42	0.376751	-0.16	1	0	0.14	1	0	-0.01	1	0
FBgn0000057	adp	0.23	1	0	0.1	1	0	0.15	1	0	-0.18	1	0	-0.16	0.9	0.0457575	0.1	1	0	0.08	1	0	0.21	0.96	0.0177288	0.05	1	0	0.01	1	0	0.02	1	0	0.04	1	0	0.04	1	0	-0.01	1	0	-0.02	1	0
FBgn0038467	AdSL	-0.04	1	0	0.25	1	0	0.03	1	0	-0.06	1	0	-0.09	0.99	0.00436481	0.18	1	0	-0.06	1	0	0.04	1	0	0.05	1	0	-0.14	0.96	0.0177288	0.1	1	0	-0.17	0.94	0.0268721	0.42	0.67	0.173925	0.59	0.31	0.508638	0.28	0.98	0.00877392
FBgn0027493	AdSS	-0.42	0.98	0.00877392	-0.17	1	0	-0.46	0.7	0.154902	0.01	1	0	0.06	1	0	0.06	1	0	-0.04	1	0	0.03	1	0	-0.04	1	0	-0.00796	1	0	-0.06	1	0	-0.05	1	0	-0.03	1	0	0.11	1	0	0.08	1	0
FBgn0026602	Ady43A	-0.4	1	0	0.27	1	0	-0.21	1	0	-0.77	0.05	1.30103	-0.18	0.9	0.0457575	-0.07	1	0	-0.6	0.01	2	-0.08	0.98	0.00877392	-0.09	1	0	-0.29	0.61	0.21467	0.13	0.97	0.0132283	-0.1	0.99	0.00436481	-0.38	0.54	0.267606	-0.09	1	0	0.41	0.43	0.366532
FBgn0005694	Aef1	-0.27	1	0	-0.23	1	0	-0.12	1	0	-0.16	1	0	-0.23	0.8	0.09691	0.11	1	0	-0.17	1	0	-0.07	1	0	-0.14	1	0	0.02	1	0	0.19	0.86	0.0655015	-0.08	1	0	0.28	0.85	0.0705811	-0.02	1	0	-0.16	1	0
FBgn0026309	aft	-0.07	1	0	0.11	1	0	0.06	1	0	-0.07	1	0	-0.23	0.81	0.091515	0.18	1	0	0.06	1	0	0.24	0.96	0.0177288	0.18	1	0	-0.00938	1	0	-0.04	1	0	-0.15	0.87	0.0604807	0.27	0.84	0.0757207	0.06	1	0	0.02	1	0
FBgn0038223	Afti	-0.16	1	0	-0.00438	1	0	0.11	1	0	0.02	1	0	-0.05	1	0	0.16	1	0	-0.00381	1	0	0.12	0.96	0.0177288	0.06	1	0	0.06	1	0	0.16	0.84	0.0757207	0.07	0.99	0.00436481	0.18	0.96	0.0177288	0.02	1	0	0.01	1	0
FBgn0015010	Ag5r	-0.62	0.8	0.09691	-0.87	0.78	0.107905	-0.22	1	0	0.62	0.13	0.886057	0.51	0.27	0.568636	0.21	1	0	0.16	1	0	-0.09	1	0	-0.00396	1	0	-0.14	0.83	0.0809219	-0.18	0.76	0.119186	-0.08	0.97	0.0132283	0.06	1	0	0.48	0.29	0.537602	0.35	0.59	0.229148
FBgn0020508	Ag5r2	-1.89	0.04	1.39794	-1.56	0.22	0.657577	-3.14	1.11e-06	5.95468	0.56	0.47	0.327902	-0.0045	1	0	0.05	1	0	0.25	1	0	-0.38	0.96	0.0177288	-0.28	1	0	0.2	0.82	0.0861861	-0.68	0.02	1.69897	-0.18	0.87	0.0604807	0.26	0.92	0.0362122	0.51	0.55	0.259637	0.76	0.1	1
FBgn0053138	AGBE	-0.32	1	0	-0.38	1	0	-0.96	0.31	0.508638	-0.13	1	0	0.09	0.98	0.00877392	-0.17	1	0	-0.09	1	0	0.08	0.98	0.00877392	0.07	1	0	-0.04	1	0	-0.09	1	0	-0.26	0.72	0.142668	-0.41	0.04	1.39794	0.1	1	0	0.15	0.95	0.0222764
FBgn0041171	ago	-0.08	1	0	-0.14	1	0	-0.00418	1	0	-0.12	1	0	-0.28	0.75	0.124939	0.11	1	0	-0.02	1	0	0.13	0.96	0.0177288	0.04	1	0	0.03	1	0	-0.02	1	0	-0.00588	1	0	0.39	0.21	0.677781	0.13	1	0	0.09	1	0
FBgn0262739	AGO1	-0.05	1	0	0.05	1	0	0.02	1	0	0.15	1	0	0.12	0.91	0.0409586	0.13	1	0	0.06	1	0	-0.12	0.96	0.0177288	-0.14	1	0	0.05	1	0	0.03	1	0	-0.12	0.94	0.0268721	0.02	1	0	0.02	1	0	-0.11	1	0
FBgn0087035	AGO2	-0.35	1	0	-0.22	1	0	-0.34	0.99	0.00436481	-0.07	1	0	-0.00382	1	0	-0.11	1	0	-0.05	1	0	-0.16	0.96	0.0177288	-0.13	1	0	-0.24	0.46	0.337242	-0.18	0.74	0.130768	-0.28	0.31	0.508638	-0.24	0.54	0.267606	-0.31	0.26	0.585027	-0.21	0.64	0.19382
FBgn0250816	AGO3	0.74	0.64	0.19382	0.72	1	0	0.68	0.58	0.236572	-0.15	1	0	-0.3	0.63	0.200659	0.01	1	0	0.00297	1	0	0.22	0.96	0.0177288	-0.00197	1	0	0.39	0.19	0.721246	0.3	0.5	0.30103	0.21	0.71	0.148742	1.3	0.00705	2.15181	0.54	0.76	0.119186	0.29	1	0
FBgn0024912	agt	-0.02	1	0	0.15	1	0	0.29	1	0	-0.01	1	0	-0.05	1	0	0.18	1	0	-0.00386	1	0	0.28	0.96	0.0177288	0.19	1	0	-0.04	1	0	0.02	1	0	-0.46	0.58	0.236572	0.09	1	0	0.04	1	0	-0.2	1	0
FBgn0014455	Ahcy13	-0.24	1	0	-0.21	1	0	-0.21	1	0	-0.06	1	0	-0.04	1	0	0.13	1	0	-0.03	1	0	0.08	1	0	0.05	1	0	-0.08	0.98	0.00877392	-0.21	0.69	0.161151	-0.00224	1	0	0.08	1	0	-0.04	1	0	-0.06	1	0
FBgn0015011	Ahcy89E	0.21	1	0	0.00589	1	0	0.11	1	0	0.03	1	0	0.4	0.63	0.200659	-0.52	1	0	0.00755	1	0	-0.33	0.96	0.0177288	-0.07	1	0	0.05	1	0	-0.04	1	0	0.15	0.85	0.0705811	-0.17	0.96	0.0177288	-0.28	0.84	0.0757207	-0.18	1	0
FBgn0031392	AIF	0.06	1	0	0.05	1	0	0.12	1	0	-0.07	1	0	-0.19	0.83	0.0809219	0.09	1	0	-0.04	1	0	0.12	0.96	0.0177288	0.03	1	0	0.19	0.69	0.161151	0.25	0.51	0.29243	0.26	0.4	0.39794	0.27	0.43	0.366532	0.12	1	0	0.19	0.81	0.091515
FBgn0033754	Ak6	-0.48	1	0	-0.15	1	0	-0.25	1	0	0.13	1	0	-0.04	1	0	0.04	1	0	0.08	1	0	0.24	0.96	0.0177288	-0.07	1	0	0.01	1	0	0.11	1	0	-0.23	0.93	0.0315171	0.25	0.97	0.0132283	-0.22	1	0	0.08	1	0
FBgn0027932	Akap200	-0.16	1	0	-0.14	1	0	-0.02	1	0	-0.04	1	0	-0.06	1	0	0.03	1	0	-0.16	1	0	-0.07	1	0	-0.13	1	0	-0.09	0.96	0.0177288	-0.01	1	0	-0.13	0.86	0.0655015	-0.27	0.43	0.366532	-0.59	0.0004	3.39794	-0.65	4.81e-05	4.31785
FBgn0004552	Akh	0.25	1	0	-0.22	1	0	-0.22	1	0	-0.07	1	0	0.54	0.9	0.0457575	-0.64	1	0	0.14	1	0	0.18	1	0	0.07	1	0	-0.41	0.79	0.102373	-0.36	0.88	0.0555173	-0.94	0.17	0.769551	0.12	1	0	-0.07	1	0	-0.17	1	0
FBgn0025595	AkhR	0.33	1	0	0.67	1	0	-0.07	1	0	0.17	1	0	0.08	1	0	-0.34	1	0	-0.34	1	0	-0.66	0.53	0.275724	-0.29	1	0	-0.26	0.43	0.366532	-0.67	7.86e-05	4.10458	-0.15	0.81	0.091515	-0.69	0.12	0.920819	-0.9	0.01	2	-0.98	0.00543	2.2652
FBgn0082598	akirin	-0.1	1	0	-0.03	1	0	0.00439	1	0	0.02	1	0	-0.1	0.96	0.0177288	0.1	1	0	-0.03	1	0	0.15	0.96	0.0177288	-0.00282	1	0	0.13	0.87	0.0604807	0.18	0.76	0.119186	0.03	1	0	0.3	0.29	0.537602	0.1	1	0	0.04	1	0
FBgn0010379	Akt1	-0.04	1	0	0.09	1	0	0.08	1	0	-0.03	1	0	-0.01	1	0	0.02	1	0	-0.04	1	0	0.05	1	0	-0.06	1	0	-0.15	0.79	0.102373	-0.02	1	0	-0.12	0.89	0.05061	0.06	1	0	-0.11	1	0	-0.09	1	0
FBgn0000061	al	0.08	1	0	-0.16	1	0	-0.04	1	0	0.00301	1	0	1.31	0.83	0.0809219	0.27	1	0	-0.8	1	0	-2.68	0.85	0.0705811	-0.99	1	0	-0.67	0.94	0.0268721	-1.06	0.82	0.0861861	-0.86	0.86	0.0655015	-0.47	0.96	0.0177288	-0.54	1	0	-1.5	0.57	0.244125
FBgn0020764	Alas	-0.1	1	0	0.01	1	0	-0.02	1	0	-0.15	1	0	0.17	0.86	0.0655015	-0.37	1	0	-0.12	1	0	-0.27	0.95	0.0222764	-0.16	1	0	-0.03	1	0	-0.22	0.67	0.173925	-0.08	0.98	0.00877392	-0.3	0.81	0.091515	-0.06	1	0	-0.18	1	0
FBgn0260972	alc	-0.0014	1	0	0.04	1	0	0.06	1	0	-0.1	1	0	0.07	1	0	-0.09	1	0	-0.02	1	0	-0.06	1	0	-0.04	1	0	-0.07	0.99	0.00436481	-0.03	1	0	-0.08	0.97	0.0132283	-0.12	0.93	0.0315171	-0.12	1	0	-0.14	1	0
FBgn0000064	Ald	-0.39	1	0	-0.02	1	0	-1.21	0.19	0.721246	0.07	1	0	0.42	0.64	0.19382	-0.42	1	0	-0.17	1	0	-0.56	0.43	0.366532	-0.33	1	0	0.06	1	0	0.1	1	0	-0.18	0.88	0.0555173	-0.18	0.91	0.0409586	0.26	0.73	0.136677	0.1	1	0
FBgn0000063	ald	-0.17	1	0	0.11	1	0	0.14	1	0	-0.31	1	0	-0.55	0.39	0.408935	0.15	1	0	-0.07	1	0	0.16	0.96	0.0177288	-0.000681	1	0	0.82	0.17	0.769551	1.14	0.02	1.69897	0.85	0.14	0.853872	0.87	0.43	0.366532	0.69	0.7	0.154902	0.34	1	0
FBgn0012036	Aldh	-0.09	1	0	-0.09	1	0	-0.52	0.82	0.0861861	0.16	1	0	0.24	0.83	0.0809219	0.06	1	0	0.03	1	0	0.05	1	0	0.04	1	0	0.22	0.76	0.119186	0.09	1	0	0.17	0.88	0.0555173	0.22	0.59	0.229148	0.38	0.09	1.04576	0.38	0.07	1.1549
FBgn0010548	Aldh-III	0.09	1	0	0.07	1	0	-0.3	0.99	0.00436481	0.04	1	0	0.15	0.89	0.05061	-0.02	1	0	-0.11	1	0	-0.07	0.99	0.00436481	-0.03	1	0	-0.07	0.98	0.00877392	-0.21	0.64	0.19382	0.05	1	0	-0.3	0.65	0.187087	-0.29	0.71	0.148742	-0.25	0.82	0.0861861
FBgn0052076	Alg10	0.21	1	0	0.11	1	0	0.25	1	0	-0.17	1	0	-0.16	0.91	0.0409586	0.16	1	0	-0.0076	1	0	0.15	0.96	0.0177288	0.05	1	0	-0.00745	1	0	-0.12	0.99	0.00436481	-0.04	1	0	0.25	0.96	0.0177288	0.12	1	0	-0.1	1	0
FBgn0086378	Alg-2	0.17	1	0	0.3	1	0	0.12	1	0	-0.06	1	0	-0.12	0.93	0.0315171	0.00322	1	0	0.06	1	0	0.23	0.92	0.0362122	0.04	1	0	-0.05	1	0	0.21	0.8	0.09691	-0.00663	1	0	0.06	1	0	-0.09	1	0	-0.09	1	0
FBgn0261238	Alh	-0.04	1	0	0.04	1	0	0.17	1	0	-0.22	1	0	-0.29	0.69	0.161151	0.24	1	0	0.02	1	0	0.11	0.96	0.0177288	0.04	1	0	0.09	0.96	0.0177288	-0.07	1	0	-0.09	0.94	0.0268721	0.32	0.81	0.091515	0.1	1	0	-0.03	1	0
FBgn0013746	alien	-0.11	1	0	-0.08	1	0	-0.21	1	0	-0.14	1	0	-0.22	0.8	0.09691	-0.11	1	0	-0.17	1	0	-0.03	1	0	-0.1	1	0	0.05	1	0	0.01	1	0	-0.08	1	0	-0.06	1	0	-0.15	1	0	-0.27	0.9	0.0457575
FBgn0086346	ALiX	-0.13	1	0	-0.14	1	0	-0.32	0.92	0.0362122	-0.000458	1	0	0.05	1	0	-0.04	1	0	0.06	1	0	-0.1	0.96	0.0177288	-0.03	1	0	-0.09	0.96	0.0177288	-0.16	0.83	0.0809219	-0.09	0.94	0.0268721	-0.03	1	0	0.02	1	0	0.07	1	0
FBgn0040505	Alk	-0.15	1	0	-0.31	1	0	-0.1	1	0	0.26	1	0	0.47	0.45	0.346787	-0.15	1	0	-0.07	1	0	-0.6	0.46	0.337242	-0.29	1	0	-0.14	0.91	0.0409586	0.02	1	0	-0.35	0.31	0.508638	-0.07	1	0	0.3	0.32	0.49485	0.1	1	0
FBgn0065035	AlkB	0.17	1	0	0.02	1	0	-0.18	1	0	-0.09	1	0	-0.34	0.72	0.142668	0.08	1	0	0.04	1	0	0.45	0.66	0.180456	0.21	1	0	0.12	1	0	0.3	0.84	0.0757207	0.28	0.84	0.0757207	0.33	0.96	0.0177288	0.06	1	0	0.09	1	0
FBgn0086361	alph	-0.07	1	0	-0.02	1	0	0.02	1	0	-0.02	1	0	-0.12	0.91	0.0409586	0.05	1	0	0.01	1	0	0.00565	1	0	-0.00499	1	0	-0.06	1	0	-0.02	1	0	-0.05	1	0	0.03	1	0	-0.01	1	0	0.02	1	0
FBgn0031491	alpha4GT1	-0.05	1	0	-0.02	1	0	0.07	1	0	-0.18	1	0	-0.32	0.63	0.200659	-0.03	1	0	-0.06	1	0	0.1	0.96	0.0177288	0.00236	1	0	-0.05	1	0	-0.24	0.82	0.0861861	-0.26	0.7	0.154902	-0.04	1	0	-0.26	0.92	0.0362122	-0.39	0.53	0.275724
FBgn0039378	alpha4GT2	#N/A	#N/A	#N/A	#N/A	#N/A	#N/A	#N/A	#N/A	#N/A	2.41	1	0	0.13	1	0	0.05	1	0	#N/A	#N/A	#N/A	#N/A	#N/A	#N/A	#N/A	#N/A	#N/A	-0.3	0.73	0.136677	0.09	1	0	-0.14	0.96	0.0177288	-0.22	0.97	0.0132283	-0.06	1	0	-0.08	1	0
FBgn0010215	alpha-Cat	-0.19	1	0	-0.1	1	0	-0.08	1	0	-0.03	1	0	-0.16	0.89	0.05061	0.06	1	0	-0.01	1	0	0.13	0.96	0.0177288	0.04	1	0	-0.1	0.94	0.0268721	0.1	0.96	0.0177288	-0.09	0.95	0.0222764	-0.03	1	0	-0.16	0.92	0.0362122	-0.16	0.94	0.0268721
FBgn0029105	alpha-catenin-related	-0.42	1	0	-0.26	1	0	-0.15	1	0	0.28	1	0	0.4	0.83	0.0809219	-0.00706	1	0	-0.42	1	0	-0.55	0.96	0.0177288	-0.57	1	0	-0.02	1	0	-0.15	0.96	0.0177288	-0.11	0.96	0.0177288	-0.26	0.82	0.0861861	-0.3	0.73	0.136677	-0.22	0.97	0.0132283
FBgn0025725	alphaCOP	-0.05	1	0	-0.04	1	0	-0.17	1	0	0.13	1	0	0.18	0.83	0.0809219	0.17	1	0	0.06	1	0	0.06	1	0	0.02	1	0	0.06	1	0	-0.07	1	0	-0.02	1	0	-0.15	0.89	0.05061	-0.17	0.88	0.0555173	-0.15	0.95	0.0222764
FBgn0015568	alpha-Est1	0.00686	1	0	-0.1	1	0	-0.2	1	0	0.1	1	0	0.06	1	0	0.02	1	0	-0.08	1	0	-0.14	0.96	0.0177288	0.05	1	0	-0.14	0.86	0.0655015	-0.00427	1	0	-0.07	0.99	0.00436481	-0.02	1	0	-0.15	1	0	-0.15	1	0
FBgn0015569	alpha-Est10	-0.06	1	0	-0.4	1	0	-0.09	1	0	0.44	0.75	0.124939	-0.14	0.9	0.0457575	0.54	0.37	0.431798	0.32	1	0	0.12	0.96	0.0177288	0.32	1	0	0.16	0.77	0.113509	-0.25	0.56	0.251812	0.08	0.98	0.00877392	0.09	1	0	-0.33	0.67	0.173925	-0.19	1	0
FBgn0015570	alpha-Est2	0.45	1	0	1.09	0.97	0.0132283	0.13	1	0	0.41	1	0	0.2	0.88	0.0555173	-0.12	1	0	-0.72	0.4	0.39794	-0.86	0.04	1.39794	-0.59	1	0	-0.08	1	0	-0.31	0.64	0.19382	-0.00155	1	0	-0.69	0.03	1.52288	-0.96	0.000446	3.35067	-0.83	0.0052	2.284
FBgn0015571	alpha-Est3	0.12	1	0	0.21	1	0	-0.04	1	0	0.11	1	0	0.18	0.9	0.0457575	-0.03	1	0	0.04	1	0	-0.09	1	0	-0.04	1	0	0.13	0.87	0.0604807	0.0032	1	0	0.1	0.94	0.0268721	0.12	0.95	0.0222764	0.15	0.97	0.0132283	0.25	0.48	0.318759
FBgn0015572	alpha-Est4	-0.48	1	0	-0.03	1	0	-0.94	0.47	0.327902	0.11	1	0	0.4	0.85	0.0705811	-0.08	1	0	0.15	1	0	-0.44	0.96	0.0177288	0.34	1	0	0.3	0.86	0.0655015	0.07	1	0	0.16	0.99	0.00436481	-0.09	1	0	-0.44	0.91	0.0409586	-0.23	1	0
FBgn0027934	alpha-Est4aPsi	-1.49	1	0	-0.54	1	0	-3.85	0.9	0.0457575	-0.61	1	0	0.02	1	0	-2.97	0.31	0.508638	-0.58	1	0	-0.22	1	0	0.06	1	0	-0.39	0.94	0.0268721	0.13	1	0	0.05	1	0	-0.09	1	0	-0.07	1	0	0.01	1	0
FBgn0261393	alpha-Est5	-0.5	1	0	-0.37	1	0	-0.72	0.42	0.376751	0.41	1	0	0.31	0.69	0.161151	0.00968	1	0	0.29	1	0	0.15	0.96	0.0177288	0.13	1	0	0.05	1	0	-0.05	1	0	0.06	1	0	-0.02	1	0	-0.1	1	0	0.06	1	0
FBgn0015574	alpha-Est6	0.85	0.71	0.148742	0.48	1	0	0.89	0.49	0.309804	0.36	1	0	0.32	1	0	-0.75	1	0	0.19	1	0	-0.05	1	0	0.05	1	0	0.23	0.8	0.09691	0.18	0.92	0.0362122	0.32	0.57	0.244125	0.23	0.89	0.05061	0.23	0.95	0.0222764	0.36	0.54	0.267606
FBgn0015575	alpha-Est7	-0.13	1	0	-0.09	1	0	-0.36	0.99	0.00436481	0.33	1	0	0.41	0.39	0.408935	-0.2	1	0	-0.15	1	0	-0.3	0.96	0.0177288	-0.1	1	0	0.02	1	0	-0.32	0.35	0.455932	-0.15	0.83	0.0809219	-0.3	0.81	0.091515	-0.27	0.91	0.0409586	-0.34	0.69	0.161151
FBgn0015576	alpha-Est8	-0.76	0.44	0.356547	-1.12	0.11	0.958607	-0.96	0.13	0.886057	0.56	0.26	0.585027	0.5	0.26	0.585027	0.29	1	0	0.18	1	0	-0.12	1	0	-0.01	1	0	-0.03	1	0	-0.18	0.76	0.119186	0.05	1	0	-0.1	0.97	0.0132283	-0.12	1	0	-0.23	0.83	0.0809219
FBgn0015577	alpha-Est9	-0.34	1	0	-0.14	1	0	-0.48	0.51	0.29243	-0.1	1	0	0.23	0.8	0.09691	-0.26	1	0	0.27	1	0	-0.28	0.96	0.0177288	0.00475	1	0	-0.37	0.1	1	-0.23	0.58	0.236572	-0.31	0.22	0.657577	-0.2	0.74	0.130768	-0.1	1	0	0.03	1	0
FBgn0052865	alphagamma-element:CR32865	-0.19	1	0	-0.1	1	0	-0.23	1	0	-0.23	1	0	0.9	0.7	0.154902	-0.92	1	0	-0.48	1	0	-0.5	0.96	0.0177288	-0.37	1	0	-1.31	0.1	1	0.48	0.82	0.0861861	-0.32	0.94	0.0268721	-0.28	0.97	0.0132283	-0.25	1	0	-0.25	1	0
FBgn0035657	alphaKap4	1.13	0.34	0.468521	0.56	1	0	1.09	0.22	0.657577	2.41	1	0	0.13	1	0	2.31	1	0	-0.07	1	0	-0.04	1	0	2.48	1	0	0.44	0.24	0.619789	0.58	0.06	1.22185	0.47	0.17	0.769551	0.19	0.95	0.0222764	0.15	1	0	0.4	0.46	0.337242
FBgn0259170	alpha-Man-I	-0.11	1	0	-0.07	1	0	-0.13	1	0	0.03	1	0	-0.08	1	0	0.08	1	0	-0.04	1	0	0.12	0.96	0.0177288	-0.000333	1	0	-0.03	1	0	-0.04	1	0	-0.1	0.93	0.0315171	-0.06	1	0	-0.02	1	0	-0.15	0.97	0.0132283
FBgn0039634	alpha-Man-Ib	-0.12	1	0	-0.04	1	0	-0.15	1	0	-0.13	1	0	-0.3	0.64	0.19382	0.06	1	0	-0.02	1	0	0.11	0.96	0.0177288	0.03	1	0	-0.04	1	0	-0.02	1	0	-0.11	0.91	0.0409586	0.18	0.96	0.0177288	-0.06	1	0	-0.06	1	0
FBgn0011740	alpha-Man-II	-0.02	1	0	-0.02	1	0	-0.02	1	0	-0.15	1	0	-0.2	0.83	0.0809219	0.08	1	0	-0.02	1	0	0.04	1	0	0.00948	1	0	-0.04	1	0	-0.12	0.93	0.0315171	0.07	0.99	0.00436481	0.11	0.97	0.0132283	-0.1	1	0	-0.11	1	0
FBgn0026616	alpha-Man-IIb	-0.08	1	0	-0.09	1	0	-0.03	1	0	-0.15	1	0	-0.32	0.6	0.221849	0.03	1	0	0.03	1	0	0.09	0.96	0.0177288	0.06	1	0	0.02	1	0	0.00897	1	0	0.03	1	0	0.02	1	0	-0.17	0.9	0.0457575	-0.17	0.88	0.0555173
FBgn0250791	alphaSnap	0.12	1	0	0.00336	1	0	0.13	1	0	0.06	1	0	0.09	0.99	0.00436481	-0.13	1	0	-0.04	1	0	-0.05	1	0	-0.00644	1	0	-0.1	0.94	0.0268721	-0.00689	1	0	-0.12	0.9	0.0457575	-0.06	1	0	-0.03	1	0	0.004	1	0
FBgn0250789	alpha-Spec	-0.31	1	0	-0.23	1	0	-0.37	0.99	0.00436481	0.14	1	0	0.35	0.64	0.19382	-0.008	1	0	0.1	1	0	-0.13	0.96	0.0177288	-0.04	1	0	-0.06	1	0	-0.07	1	0	-0.12	0.95	0.0222764	-0.11	0.96	0.0177288	0.04	1	0	-0.08	1	0
FBgn0003863	alphaTry	-0.87	0.07	1.1549	-0.9	0.06	1.22185	-0.88	0.04	1.39794	0.19	1	0	0.26	0.84	0.0757207	-0.06	1	0	-0.00974	1	0	-0.4	0.87	0.0604807	-0.07	1	0	0.02	1	0	-0.18	0.96	0.0177288	-0.17	0.94	0.0268721	0.15	0.94	0.0268721	0.11	1	0	-0.000793	1	0
FBgn0087040	alphaTub67C	0.6	1	0	-1.49	1	0	-0.12	1	0	-0.13	1	0	-0.4	0.46	0.337242	0.13	1	0	-0.02	1	0	0.13	0.96	0.0177288	-0.11	1	0	-2.48	0.13	0.886057	-2.28	0.22	0.657577	-1.3	0.58	0.236572	6.77	7.64e-06	5.11691	4.54	0.01	2	0.52	1	0
FBgn0003884	alphaTub84B	-0.1	1	0	-0.19	1	0	-0.22	1	0	-0.11	1	0	-0.03	1	0	0.03	1	0	-0.1	1	0	-0.07	1	0	-0.08	1	0	-0.02	1	0	-0.06	1	0	0.01	1	0	-0.08	0.98	0.00877392	0.07	1	0	0.12	1	0
FBgn0003885	alphaTub84D	-0.03	1	0	0.00283	1	0	0.1	1	0	0.07	1	0	0.17	0.84	0.0757207	0.08	1	0	0.1	1	0	-0.00453	1	0	0.02	1	0	0.12	0.88	0.0555173	0.07	1	0	0.12	0.88	0.0555173	0.08	0.97	0.0132283	0.25	0.53	0.275724	0.19	0.75	0.124939
FBgn0003886	alphaTub85E	-0.7	0.8	0.09691	-0.63	1	0	-0.26	1	0	-0.41	1	0	0.86	0.8	0.09691	-1.11	1	0	0.28	1	0	-1.41	0.84	0.0757207	-0.22	1	0	0.03	1	0	0.31	0.65	0.187087	0.14	0.94	0.0268721	0.23	0.9	0.0457575	0.41	0.5	0.30103	0.55	0.14	0.853872
FBgn0031068	Alr	0.32	1	0	-0.07	1	0	0.26	1	0	-0.15	1	0	-0.22	0.9	0.0457575	0.17	1	0	0.05	1	0	0.08	1	0	0.04	1	0	0.23	0.83	0.0809219	0.27	0.79	0.102373	0.37	0.5	0.30103	0.18	0.94	0.0268721	0.23	0.94	0.0268721	0.3	0.72	0.142668
FBgn0039332	alrm	0.07	1	0	0.29	1	0	0.08	1	0	0.8	0.44	0.356547	1.39	0.00133	2.87615	0.27	1	0	0.38	1	0	-0.05	1	0	0.08	1	0	0.62	0.000885	3.05306	0.78	4.48e-06	5.34872	0.24	0.54	0.267606	0.45	0.33	0.481486	0.58	0.11	0.958607	0.2	1	0
FBgn0037116	Als2	0.13	1	0	0.11	1	0	-0.06	1	0	-0.16	1	0	-0.16	0.85	0.0705811	0.04	1	0	-0.04	1	0	-0.03	1	0	-0.02	1	0	-0.12	0.92	0.0362122	-0.12	0.92	0.0362122	-0.15	0.83	0.0809219	0.02	1	0	-0.12	1	0	-0.1	1	0
FBgn0038535	alt	-0.06	1	0	-0.09	1	0	0.21	1	0	-0.06	1	0	-0.16	0.89	0.05061	0.23	1	0	-0.13	1	0	-0.05	1	0	0.04	1	0	0.07	1	0	0.02	1	0	-0.02	1	0	0.16	0.88	0.0555173	-0.03	1	0	0.07	1	0
FBgn0004372	aly	0.69	1	0	0.82	1	0	1	0.4	0.39794	#N/A	#N/A	#N/A	#N/A	#N/A	#N/A	#N/A	#N/A	#N/A	-0.88	1	0	0.37	1	0	-0.69	1	0	0.21	0.95	0.0222764	0.16	0.99	0.00436481	0.28	0.87	0.0604807	0.06	1	0	0.24	1	0	0.4	0.95	0.0222764
FBgn0000071	Ama	-0.23	1	0	-0.25	1	0	-0.04	1	0	1.24	0.39	0.408935	2.27	0.000352	3.45346	1.23	0.49	0.309804	0.33	1	0	-0.84	0.96	0.0177288	-0.13	1	0	0.13	1	0	0.21	1	0	0.00829	1	0	-0.03	1	0	0.68	1	0	0.53	1	0
FBgn0000075	amd	-0.05	1	0	-0.42	1	0	-0.55	1	0	0.04	1	0	0.54	0.67	0.173925	0.16	1	0	0.57	1	0	-0.07	1	0	0.35	1	0	0.28	0.9	0.0457575	0.29	0.91	0.0409586	0.25	0.93	0.0315171	0.85	0.74	0.130768	-0.37	1	0	-0.3	1	0
FBgn0086782	amn	-0.11	1	0	-3.11	1	0	-3.3	0.99	0.00436481	1.48	1	0	-0.02	1	0	-0.11	1	0	-1.41	1	0	0.53	1	0	-3.62	1	0	0.21	1	0	-1.14	0.9	0.0457575	-4.75	0.61	0.21467	0.28	1	0	1.14	0.95	0.0222764	0.34	1	0
FBgn0025686	Amnionless	0.77	0.56	0.251812	0.93	0.64	0.19382	0.65	0.58	0.236572	0.8	1	0	0.73	0.85	0.0705811	-0.7	1	0	0.17	1	0	-0.76	0.96	0.0177288	-0.25	1	0	-0.42	0.88	0.0555173	0.01	1	0	-0.53	0.79	0.102373	-0.61	0.78	0.107905	-0.36	1	0	-0.34	1	0
FBgn0023179	amon	-0.12	1	0	-0.24	1	0	0.02	1	0	0.32	1	0	0.46	0.45	0.346787	-0.25	1	0	0.19	1	0	-0.24	0.96	0.0177288	-0.00806	1	0	0.02	1	0	0.04	1	0	0.07	1	0	-0.03	1	0	-0.03	1	0	-0.05	1	0
FBgn0003270	amos	#N/A	#N/A	#N/A	#N/A	#N/A	#N/A	#N/A	#N/A	#N/A	-2.1	1	0	1.17	0.85	0.0705811	0.36	1	0	-2.39	1	0	1.22	0.96	0.0177288	1.02	1	0	-0.09	1	0	2.2	0.97	0.0132283	-0.03	1	0	#N/A	#N/A	#N/A	#N/A	#N/A	#N/A	#N/A	#N/A	#N/A
FBgn0052626	AMPdeam	0.05	1	0	0.26	1	0	0.13	1	0	-0.06	1	0	0.02	1	0	-0.19	1	0	0.02	1	0	-0.07	1	0	-0.08	1	0	-0.04	1	0	-0.12	0.97	0.0132283	-0.13	0.94	0.0268721	-0.17	0.96	0.0177288	-0.15	1	0	-0.16	1	0
FBgn0027356	Amph	-0.52	0.89	0.05061	-0.36	1	0	-0.63	0.5	0.30103	-0.02	1	0	0.23	0.74	0.130768	-0.2	1	0	0.08	1	0	-0.00889	1	0	-0.04	1	0	-0.04	1	0	0.14	0.93	0.0315171	-0.1	0.95	0.0222764	-0.07	1	0	0.05	1	0	-0.02	1	0
FBgn0023169	AMPKalpha	-0.09	1	0	-0.03	1	0	-0.21	1	0	-0.09	1	0	0.03	1	0	-0.12	1	0	-0.06	1	0	-0.15	0.96	0.0177288	-0.14	1	0	-0.09	0.96	0.0177288	-0.03	1	0	-0.1	0.94	0.0268721	0.00654	1	0	0.05	1	0	-0.04	1	0
FBgn0030328	Amun	-0.14	1	0	-0.16	1	0	-0.15	1	0	-0.04	1	0	-0.16	0.9	0.0457575	0.25	1	0	-0.06	1	0	-0.000875	1	0	-0.04	1	0	-0.03	1	0	-0.08	1	0	-0.11	0.96	0.0177288	0.18	0.85	0.0705811	0.08	1	0	-0.15	1	0
FBgn0000077	amx	0.03	1	0	0.1	1	0	-0.02	1	0	-0.21	1	0	-0.48	0.48	0.318759	-0.00918	1	0	-0.01	1	0	0.2	0.96	0.0177288	0.17	1	0	0.00518	1	0	0.0032	1	0	-0.14	0.98	0.00877392	-0.004	1	0	0.01	1	0	-0.23	1	0
FBgn0000078	Amy-d	-0.21	1	0	0.53	1	0	-0.32	1	0	0.48	0.78	0.107905	0.32	0.68	0.167491	0.04	1	0	0.15	1	0	-0.24	0.96	0.0177288	0.01	1	0	-0.02	1	0	-0.47	0.24	0.619789	-0.12	0.96	0.0177288	0.13	0.96	0.0177288	0.34	0.61	0.21467	0.39	0.41	0.387216
FBgn0000079	Amy-p	-0.62	1	0	0.07	1	0	-0.86	0.57	0.244125	0.5	0.85	0.0705811	0.32	0.72	0.142668	-0.27	1	0	0.12	1	0	-0.15	0.96	0.0177288	-0.03	1	0	0.02	1	0	-0.42	0.43	0.366532	-0.05	1	0	0.17	0.96	0.0177288	0.52	0.15	0.823909	0.47	0.22	0.657577
FBgn0020506	Amyrel	-0.29	1	0	-0.28	1	0	-0.64	0.76	0.119186	2.69	0.43	0.366532	0.93	0.9	0.0457575	-0.37	1	0	0.03	1	0	0.87	0.96	0.0177288	0.88	1	0	0.64	0.86	0.0655015	1.52	0.24	0.619789	-0.03	1	0	1.26	0.49	0.309804	2.25	0.01	2	1.19	0.54	0.267606
FBgn0011746	ana	-0.59	0.84	0.0757207	-0.29	1	0	-0.52	0.79	0.102373	0.49	1	0	0.27	0.9	0.0457575	0.06	1	0	-0.45	1	0	-0.3	1	0	-0.19	1	0	0.15	0.91	0.0409586	-0.49	0.14	0.853872	0.16	0.89	0.05061	-0.07	1	0	0.17	1	0	0.18	1	0
FBgn0262167	ana1	0.14	1	0	0.22	1	0	0.2	1	0	-0.33	1	0	-0.46	0.36	0.443697	0.01	1	0	-0.06	1	0	-0.00958	1	0	0.00112	1	0	0.29	0.34	0.468521	0.32	0.31	0.508638	0.22	0.55	0.259637	0.37	0.68	0.167491	0.18	1	0	0.29	0.88	0.0555173
FBgn0027513	ana2	-0.79	0.89	0.05061	0.12	1	0	0.07	1	0	-0.9	0.09	1.04576	-0.62	0.38	0.420216	0.2	1	0	-0.59	0.62	0.207608	0.16	0.96	0.0177288	-0.02	1	0	-0.42	0.64	0.19382	0.26	0.91	0.0409586	0.47	0.46	0.337242	0.32	0.96	0.0177288	0.39	0.98	0.00877392	0.32	1	0
FBgn0266111	ana3	-0.02	1	0	0.15	1	0	0.14	1	0	-0.4	1	0	-0.67	0.09	1.04576	0.05	1	0	-0.08	1	0	0.04	1	0	0.00402	1	0	0.31	0.52	0.283997	0.24	0.77	0.113509	0.27	0.63	0.200659	0.72	0.08	1.09691	0.22	1	0	0.21	1	0
FBgn0012037	Ance	0.1	1	0	-0.09	1	0	-0.05	1	0	0.46	0.85	0.0705811	0.41	0.5	0.30103	-0.29	1	0	0.06	1	0	-0.43	0.78	0.107905	-0.1	1	0	0.44	0.04	1.39794	0.15	0.87	0.0604807	0.13	0.88	0.0555173	0.03	1	0	-0.02	1	0	-0.06	1	0
FBgn0032535	Ance-2	1.65	0.25	0.60206	1.57	0.45	0.346787	1.61	0.15	0.823909	1.47	0.99	0.00436481	1.74	0.33	0.481486	0.24	1	0	0.64	1	0	0.74	0.96	0.0177288	1.01	1	0	0.96	0.54	0.267606	0.46	0.96	0.0177288	1.01	0.46	0.337242	0.71	0.74	0.130768	0.65	0.85	0.0705811	0.96	0.41	0.387216
FBgn0032536	Ance-3	-0.18	1	0	0.26	1	0	-0.49	1	0	-0.26	1	0	0.46	0.7	0.154902	-0.46	1	0	0.23	1	0	-0.2	1	0	-0.02	1	0	-0.47	0.21	0.677781	0.05	1	0	-0.33	0.52	0.283997	-0.03	1	0	0.08	1	0	-0.00332	1	0
FBgn0033366	Ance-4	-0.55	0.73	0.136677	-0.01	1	0	-0.21	1	0	0.36	1	0	0.29	0.75	0.124939	0.04	1	0	-0.01	1	0	-0.29	0.96	0.0177288	-0.2	1	0	-0.29	0.62	0.207608	-0.07	1	0	-0.29	0.59	0.229148	0.27	0.88	0.0555173	0.2	1	0	0.1	1	0
FBgn0035076	Ance-5	-0.65	0.79	0.102373	-0.19	1	0	-1	0.2	0.69897	-0.21	1	0	0.49	0.62	0.207608	-0.56	1	0	-0.31	1	0	-0.38	0.96	0.0177288	-0.25	1	0	-0.56	0.00408	2.38934	-0.21	0.72	0.142668	-0.24	0.51	0.29243	-0.23	0.87	0.0604807	-0.44	0.29	0.537602	-0.29	0.73	0.136677
FBgn0030898	Andorra	0.99	1	0	0.47	1	0	0.38	1	0	#N/A	#N/A	#N/A	#N/A	#N/A	#N/A	#N/A	#N/A	#N/A	-2.39	1	0	-0.14	1	0	-2.24	1	0	0.67	0.19	0.721246	0.49	0.57	0.244125	0.53	0.41	0.387216	-0.03	1	0	0.2	1	0	0.37	0.98	0.00877392
FBgn0016762	angel	-0.02	1	0	-0.00198	1	0	-0.09	1	0	-0.3	1	0	-0.07	1	0	-0.06	1	0	0.22	1	0	0.31	0.96	0.0177288	0.09	1	0	-0.12	1	0	-0.00779	1	0	-0.04	1	0	-0.06	1	0	-0.1	1	0	0.1	1	0
FBgn0011747	Ank	-0.19	1	0	-0.06	1	0	-0.17	1	0	-0.00268	1	0	-0.03	1	0	-0.08	1	0	-0.000447	1	0	0.03	1	0	0.00292	1	0	-0.25	0.64	0.19382	-0.07	1	0	-0.15	0.88	0.0555173	-0.07	0.98	0.00877392	-0.12	1	0	-0.09	1	0
FBgn0261788	Ank2	-0.24	1	0	-0.06	1	0	-0.12	1	0	0.24	1	0	0.52	0.28	0.552842	-0.18	1	0	0.11	1	0	-0.58	0.34	0.468521	-0.27	1	0	-0.02	1	0	0.05	1	0	-0.18	0.85	0.0705811	-0.13	0.92	0.0362122	-0.07	1	0	-0.12	1	0
FBgn0000094	Anp	0.04	1	0	-0.84	1	0	-2.16	0.56	0.251812	-0.39	1	0	-0.03	1	0	-0.12	1	0	#N/A	#N/A	#N/A	#N/A	#N/A	#N/A	#N/A	#N/A	#N/A	-0.06	1	0	-0.05	1	0	-0.07	1	0	-0.23	0.92	0.0362122	0.09	1	0	-0.1	1	0
FBgn0025111	Ant2	0.34	1	0	0.23	1	0	0.41	0.97	0.0132283	-0.11	1	0	0.33	0.9	0.0457575	-0.51	1	0	0.23	1	0	0.34	0.96	0.0177288	0.46	1	0	0.12	0.89	0.05061	0.19	0.74	0.130768	0.26	0.4	0.39794	0.25	0.55	0.259637	0.34	0.23	0.638272	0.38	0.09	1.04576
FBgn0026268	antdh	-0.00656	1	0	0.13	1	0	-0.07	1	0	0.07	1	0	0.5	0.61	0.21467	-0.1	1	0	-0.00944	1	0	-0.57	0.96	0.0177288	-0.17	1	0	-0.13	0.97	0.0132283	-0.38	0.55	0.259637	-0.12	0.97	0.0132283	-0.29	0.8	0.09691	0.08	1	0	0.00478	1	0
FBgn0260642	Antp	-0.19	1	0	-0.18	1	0	-0.06	1	0	0.07	1	0	0.38	0.68	0.167491	-0.16	1	0	-0.05	1	0	-0.24	0.97	0.0132283	-0.16	1	0	0.15	0.92	0.0362122	0.23	0.79	0.102373	0.01	1	0	-0.04	1	0	0.13	1	0	-0.1	1	0
FBgn0050488	antr	-0.11	1	0	0.68	1	0	-0.12	1	0	-0.92	1	0	-0.42	1	0	-0.51	1	0	2.04	1	0	2.16	0.96	0.0177288	2.24	1	0	0.17	0.89	0.05061	-0.02	1	0	0.24	0.72	0.142668	-0.42	0.33	0.481486	-0.3	0.74	0.130768	-0.05	1	0
FBgn0000084	AnxB10	0.04	1	0	-0.11	1	0	-0.13	1	0	-0.05	1	0	-0.00368	1	0	-0.01	1	0	0.02	1	0	-0.04	1	0	0.1	1	0	-0.03	1	0	-0.11	0.95	0.0222764	-0.07	0.99	0.00436481	-0.14	0.91	0.0409586	-0.00969	1	0	-0.03	1	0
FBgn0030749	AnxB11	-0.23	1	0	-0.13	1	0	-0.15	1	0	0.01	1	0	0.15	0.9	0.0457575	-0.04	1	0	-0.11	1	0	-0.19	0.96	0.0177288	-0.03	1	0	-0.3	0.29	0.537602	-0.18	0.79	0.102373	-0.13	0.87	0.0604807	-0.19	0.89	0.05061	-0.13	1	0	-0.06	1	0
FBgn0000083	AnxB9	-0.00542	1	0	0.00473	1	0	-0.29	1	0	-0.25	1	0	0.04	1	0	-0.31	1	0	0.04	1	0	-0.13	0.96	0.0177288	0.02	1	0	-0.53	0.01	2	-0.26	0.57	0.244125	-0.55	0.0093	2.03152	-0.2	0.92	0.0362122	-0.21	0.98	0.00877392	-0.04	1	0
FBgn0000097	aop	-0.05	1	0	-0.16	1	0	0.38	0.99	0.00436481	0.03	1	0	0.03	1	0	0.19	1	0	0.02	1	0	0.02	1	0	-0.06	1	0	-0.1	0.97	0.0132283	-0.33	0.52	0.283997	-0.3	0.5	0.30103	0.05	1	0	-0.04	1	0	-0.18	1	0
FBgn0004569	aos	-0.07	1	0	-0.22	1	0	-0.08	1	0	0.31	1	0	0.42	0.6	0.221849	0.08	1	0	0.13	1	0	0.02	1	0	0.17	1	0	-0.14	0.93	0.0315171	0.27	0.67	0.173925	0.03	1	0	-0.26	0.85	0.0705811	-0.21	0.98	0.00877392	-0.3	0.76	0.119186
FBgn0029512	Aos1	0.02	1	0	0.12	1	0	-0.02	1	0	-0.24	1	0	-0.42	0.39	0.408935	0.17	1	0	-0.1	1	0	0.16	0.96	0.0177288	0.05	1	0	0.17	0.94	0.0268721	0.1	1	0	0.000649	1	0	0.5	0.54	0.267606	-0.02	1	0	-0.11	1	0
FBgn0267408	AOX1	-0.36	1	0	0.09	1	0	-0.6	0.53	0.275724	-0.07	1	0	0.29	0.76	0.119186	-0.66	0.31	0.508638	-0.05	1	0	-0.42	0.27	0.568636	-0.21	1	0	0.2	0.8	0.09691	-0.07	1	0	0.09	0.99	0.00436481	-0.21	0.69	0.161151	0.08	1	0	-0.1	1	0
FBgn0038348	AOX2	0.64	1	0	1.02	1	0	-0.75	0.77	0.113509	-0.34	1	0	0.4	0.92	0.0362122	-0.09	1	0	0.08	1	0	-0.11	1	0	0.00332	1	0	-0.14	1	0	-0.1	1	0	0.51	0.87	0.0604807	-0.12	1	0	-0.18	1	0	-0.56	0.94	0.0268721
FBgn0038349	AOX3	-0.05	1	0	0.17	1	0	-0.42	0.8	0.09691	0.12	1	0	0.17	0.87	0.0604807	-0.11	1	0	0.09	1	0	-0.05	1	0	0.01	1	0	-0.02	1	0	-0.01	1	0	-0.04	1	0	-0.11	0.96	0.0177288	-0.1	1	0	-0.08	1	0
FBgn0038350	AOX4	-0.59	1	0	-1.89	1	0	-1.05	0.98	0.00877392	0.04	1	0	0.39	0.92	0.0362122	-0.13	1	0	0.39	1	0	-0.07	1	0	-0.08	1	0	0.09	1	0	0.04	1	0	-0.16	0.99	0.00436481	0.07	1	0	0.1	1	0	-0.07	1	0
FBgn0000099	ap	-0.09	1	0	0.04	1	0	0.09	1	0	0.15	1	0	0.36	0.67	0.173925	-0.3	1	0	-0.28	1	0	-0.78	0.37	0.431798	-0.3	1	0	-0.27	0.4	0.39794	-0.25	0.53	0.275724	-0.13	0.86	0.0655015	-0.56	0.12	0.920819	-0.32	0.74	0.130768	-0.38	0.53	0.275724
FBgn0010380	AP-1-2beta	0.07	1	0	-0.04	1	0	-0.12	1	0	-0.06	1	0	0.00487	1	0	0.03	1	0	-0.02	1	0	-0.03	1	0	-0.00824	1	0	-0.11	0.92	0.0362122	-0.08	0.99	0.00436481	-0.08	0.97	0.0132283	0.00986	1	0	-0.02	1	0	-0.08	1	0
FBgn0030089	AP-1gamma	-0.16	1	0	-0.24	1	0	-0.2	1	0	0.12	1	0	0.05	1	0	0.15	1	0	0.27	1	0	0.03	1	0	-0.06	1	0	0.04	1	0	-0.06	1	0	-0.02	1	0	0.12	0.93	0.0315171	0.11	1	0	0.02	1	0
FBgn0024833	AP-1mu	0.08	1	0	-0.06	1	0	-0.03	1	0	-0.06	1	0	-0.16	0.9	0.0457575	0.06	1	0	0.1	1	0	0.12	0.96	0.0177288	0.11	1	0	-0.08	1	0	0.06	1	0	0.00738	1	0	0.09	1	0	-0.02	1	0	-0.08	1	0
FBgn0039132	AP-1sigma	-0.03	1	0	-0.07	1	0	-0.00858	1	0	0.0064	1	0	-0.06	1	0	0.05	1	0	0.0074	1	0	0.14	0.96	0.0177288	0.0014	1	0	-0.01	1	0	0.00231	1	0	-0.04	1	0	0.03	1	0	-0.2	1	0	-0.1	1	0
FBgn0264855	AP-2alpha	-0.11	1	0	-0.07	1	0	-0.15	1	0	-0.12	1	0	-0.2	0.82	0.0861861	0.02	1	0	-0.04	1	0	0.06	1	0	-0.05	1	0	-0.06	1	0	-0.06	1	0	-0.14	0.84	0.0757207	0.1	0.96	0.0177288	-0.00652	1	0	-0.1	1	0
FBgn0263351	AP-2mu	0.05	1	0	-0.05	1	0	-0.03	1	0	-0.17	1	0	-0.26	0.72	0.142668	0.06	1	0	-0.05	1	0	0.13	0.96	0.0177288	-0.00607	1	0	0.06	1	0	-0.05	1	0	-0.07	0.99	0.00436481	0.11	0.96	0.0177288	0.04	1	0	0.00581	1	0
FBgn0043012	AP-2sigma	0.07	1	0	-0.05	1	0	-0.02	1	0	-0.04	1	0	-0.11	0.97	0.0132283	-0.03	1	0	-0.12	1	0	0.00332	1	0	-0.09	1	0	-0.11	0.94	0.0268721	-0.08	0.99	0.00436481	-0.14	0.87	0.0604807	0.12	0.97	0.0132283	0.12	1	0	0.1	1	0
FBgn0015589	Apc	-0.17	1	0	-0.11	1	0	-0.13	1	0	0.05	1	0	0.02	1	0	0.14	1	0	-0.08	1	0	-0.18	0.96	0.0177288	-0.17	1	0	0.06	1	0	-0.06	1	0	-0.12	0.87	0.0604807	-0.04	1	0	-0.02	1	0	-0.13	1	0
FBgn0034231	APC10	-0.03	1	0	-0.04	1	0	-0.09	1	0	-0.22	1	0	-0.17	0.9	0.0457575	0.14	1	0	0.00151	1	0	0.18	0.96	0.0177288	0.15	1	0	-0.32	0.74	0.130768	-0.13	1	0	-0.11	1	0	0.12	1	0	0.00209	1	0	-0.15	1	0
FBgn0026598	Apc2	-0.03	1	0	-0.04	1	0	0.07	1	0	-0.28	1	0	-0.51	0.34	0.468521	0.12	1	0	-0.09	1	0	0.1	0.99	0.00436481	0.03	1	0	0.06	1	0	-0.09	1	0	0.00319	1	0	1.6	0.07	1.1549	0.29	1	0	0.09	1	0
FBgn0052707	APC4	0.03	1	0	-0.02	1	0	-0.18	1	0	-0.09	1	0	-0.38	0.59	0.229148	0.17	1	0	0.23	1	0	0.37	0.5	0.30103	0.18	1	0	-0.06	1	0	-0.1	1	0	-0.13	0.95	0.0222764	0.42	0.83	0.0809219	0.14	1	0	-0.05	1	0
FBgn0029879	APC7	-0.27	1	0	-1.31	1	0	-0.54	1	0	-0.11	1	0	-0.39	0.49	0.309804	0.13	1	0	-0.06	1	0	0.17	0.96	0.0177288	0.05	1	0	-2.19	0.03	1.52288	-1.09	0.51	0.29243	-0.93	0.57	0.244125	4.29	0.000284	3.54668	2.21	0.3	0.522879	0.18	1	0
FBgn0026150	ApepP	0.07	1	0	-0.1	1	0	-0.17	1	0	0.03	1	0	-0.1	0.97	0.0132283	0.03	1	0	-0.09	1	0	-0.05	1	0	-0.00729	1	0	0.06	1	0	0.01	1	0	-0.08	0.97	0.0132283	0.23	0.88	0.0555173	-0.08	1	0	-0.16	1	0
FBgn0051713	Apf	-0.28	1	0	-0.01	1	0	-0.38	1	0	-0.28	1	0	-0.2	0.9	0.0457575	-0.12	1	0	-0.25	1	0	0.01	1	0	-0.02	1	0	-0.08	1	0	-0.13	0.99	0.00436481	-0.29	0.78	0.107905	0.05	1	0	0.13	1	0	-0.02	1	0
FBgn0031458	aph-1	0.08	1	0	0.08	1	0	0.00441	1	0	-0.15	1	0	-0.32	0.75	0.124939	0.29	1	0	0.1	1	0	0.15	0.96	0.0177288	0.05	1	0	0.28	0.67	0.173925	-0.24	0.83	0.0809219	-0.12	0.97	0.0132283	0.13	1	0	0.18	1	0	0.03	1	0
FBgn0016123	Aph-4	0.11	1	0	-0.03	1	0	0.7	0.46	0.337242	0.32	1	0	0.32	0.69	0.161151	-0.27	1	0	-0.12	1	0	-0.23	0.96	0.0177288	-0.09	1	0	-0.3	0.55	0.259637	-0.21	0.83	0.0809219	-0.14	0.92	0.0362122	-0.43	0.29	0.537602	-0.67	0.01	2	-0.59	0.05	1.30103
FBgn0261854	aPKC	-0.18	1	0	-0.11	1	0	-0.24	1	0	-0.07	1	0	-0.07	1	0	0.02	1	0	0.03	1	0	0.11	0.96	0.0177288	0.00889	1	0	-0.00647	1	0	0.07	1	0	-0.02	1	0	0.16	0.87	0.0604807	0.02	1	0	-0.04	1	0
FBgn0040281	Aplip1	-0.11	1	0	-0.11	1	0	0.13	1	0	0.27	1	0	0.48	0.66	0.180456	-0.35	1	0	0.06	1	0	-0.35	0.96	0.0177288	-0.32	1	0	0.08	1	0	-0.03	1	0	-0.1	0.96	0.0177288	-0.21	0.92	0.0362122	-0.21	0.99	0.00436481	-0.15	1	0
FBgn0032136	Apoltp	-1.49	0.00548	2.26122	-1.5	0.00579	2.23732	-1.53	0.00179	2.74715	0.39	1	0	0.58	0.32	0.49485	0.34	1	0	0.09	1	0	-0.25	0.96	0.0177288	0.04	1	0	-0.49	0.18	0.744727	-0.23	0.83	0.0809219	-0.28	0.64	0.19382	-0.15	0.88	0.0555173	-0.25	0.53	0.275724	-0.25	0.45	0.346787
FBgn0260941	app	-0.12	1	0	-0.00358	1	0	-0.11	1	0	0.05	1	0	0.02	1	0	0.03	1	0	0.02	1	0	-0.23	0.96	0.0177288	-0.05	1	0	0.1	0.95	0.0222764	0.04	1	0	-0.02	1	0	0.00943	1	0	0.008	1	0	-0.04	1	0
FBgn0261112	APP-BP1	0.43	1	0	0.26	1	0	0.5	0.64	0.19382	-0.08	1	0	-0.3	0.72	0.142668	0.12	1	0	-0.04	1	0	0.19	0.96	0.0177288	0.02	1	0	0.32	0.34	0.468521	0.2	0.78	0.107905	0.37	0.21	0.677781	0.26	0.5	0.30103	0.26	0.5	0.30103	0.26	0.45	0.346787
FBgn0000108	Appl	-0.1	1	0	0.12	1	0	0.12	1	0	0.38	1	0	0.56	0.26	0.585027	-0.05	1	0	0.28	1	0	-0.32	0.96	0.0177288	-0.11	1	0	0.11	0.94	0.0268721	0.08	0.98	0.00877392	-0.04	1	0	-0.03	1	0	-0.09	1	0	-0.15	1	0
FBgn0000109	Aprt	0.25	1	0	0.43	1	0	-0.35	1	0	0.16	1	0	0.27	0.81	0.091515	0.21	1	0	-0.12	1	0	0.18	0.96	0.0177288	0.16	1	0	0.07	1	0	0.29	0.84	0.0757207	-0.08	1	0	0.16	0.99	0.00436481	0.47	0.7	0.154902	0.13	1	0
FBgn0036111	Aps	-0.01	1	0	0.00734	1	0	0.06	1	0	0.01	1	0	-0.13	0.9	0.0457575	0.12	1	0	-0.16	1	0	-0.01	1	0	-0.11	1	0	0.01	1	0	0.04	1	0	0.00146	1	0	-0.05	1	0	-0.03	1	0	-0.07	1	0
FBgn0015903	apt	-0.11	1	0	0.04	1	0	-0.13	1	0	-0.14	1	0	-0.26	0.72	0.142668	0.05	1	0	-0.04	1	0	0.07	0.99	0.00436481	0.00475	1	0	-0.03	1	0	0.11	0.99	0.00436481	-0.16	0.94	0.0268721	0.57	0.28	0.552842	0.14	1	0	0.05	1	0
FBgn0033807	AQP	-0.16	1	0	-0.00354	1	0	-0.54	1	0	-0.29	1	0	0.36	0.73	0.136677	-0.69	0.55	0.259637	-0.33	1	0	-0.71	0.64	0.19382	-0.27	1	0	-0.5	0.11	0.958607	0.1	0.98	0.00877392	-0.31	0.51	0.29243	-0.21	0.92	0.0362122	0.25	0.92	0.0362122	0.13	1	0
FBgn0039598	aqrs	3.66	1	0	4.15	1	0	2.27	1	0	2.41	1	0	0.13	1	0	4.36	1	0	#N/A	#N/A	#N/A	#N/A	#N/A	#N/A	#N/A	#N/A	#N/A	-0.01	1	0	-0.18	0.77	0.113509	-0.09	0.94	0.0268721	-0.23	0.92	0.0362122	-0.17	1	0	-0.09	1	0
FBgn0015904	ara	-0.06	1	0	-0.07	1	0	-0.13	1	0	0.06	1	0	-0.03	1	0	-0.39	1	0	-0.44	1	0	-1.02	0.82	0.0861861	-0.9	1	0	-0.27	0.81	0.091515	-0.14	0.98	0.00877392	-0.23	0.88	0.0555173	0.02	1	0	0.21	1	0	0.04	1	0
FBgn0028646	aralar1	-0.23	1	0	-0.3	1	0	-0.28	0.99	0.00436481	0.14	1	0	0.1	0.95	0.0222764	0.00168	1	0	-0.09	1	0	-0.13	0.96	0.0177288	-0.07	1	0	-0.09	0.95	0.0222764	-0.27	0.41	0.387216	-0.05	1	0	-0.28	0.85	0.0705811	-0.09	1	0	0.12	1	0
FBgn0033926	Arc1	-0.52	0.97	0.0132283	-0.41	1	0	-0.56	0.69	0.161151	0.13	1	0	0.18	0.9	0.0457575	-0.36	1	0	-0.07	1	0	-0.6	0.09	1.04576	-0.04	1	0	-0.41	0.35	0.455932	-0.05	1	0	-0.61	0.05	1.30103	-0.11	1	0	0.01	1	0	0.3	0.8	0.09691
FBgn0033928	Arc2	-0.44	1	0	-0.92	1	0	-0.8	0.59	0.229148	-0.41	1	0	-0.45	0.77	0.113509	-0.00675	1	0	-0.01	1	0	0.13	1	0	-0.07	1	0	-0.75	0.28	0.552842	-0.29	0.92	0.0362122	-0.38	0.81	0.091515	0.13	1	0	0.27	1	0	0.41	1	0
FBgn0038742	Arc42	0.11	1	0	0.03	1	0	-0.19	1	0	-0.15	1	0	-0.21	0.83	0.0809219	0.14	1	0	-0.03	1	0	0.16	0.96	0.0177288	0.12	1	0	-0.06	1	0	-0.28	0.47	0.327902	-0.15	0.85	0.0705811	0.00248	1	0	-0.08	1	0	-0.13	1	0
FBgn0000114	aret	0.16	1	0	0.08	1	0	0.27	1	0	-0.1	1	0	-0.21	0.9	0.0457575	0.07	1	0	-0.01	1	0	0.23	0.96	0.0177288	0.02	1	0	-0.08	0.96	0.0177288	0.01	1	0	-0.09	0.94	0.0268721	0.48	0.42	0.376751	0.21	1	0	0.11	1	0
FBgn0013749	Arf102F	-0.02	1	0	-0.05	1	0	-0.11	1	0	-0.04	1	0	-0.15	0.9	0.0457575	0.02	1	0	-0.06	1	0	0.21	0.96	0.0177288	0.11	1	0	-0.09	0.96	0.0177288	0.09	0.97	0.0132283	-0.08	0.96	0.0177288	0.03	1	0	-0.12	1	0	-0.05	1	0
FBgn0013750	Arf51F	-0.23	1	0	-0.23	1	0	-0.09	1	0	-0.02	1	0	-0.13	0.9	0.0457575	-0.01	1	0	0.01	1	0	0.24	0.82	0.0861861	0.04	1	0	-0.09	0.96	0.0177288	-0.02	1	0	0.02	1	0	0.07	1	0	-0.03	1	0	-0.04	1	0
FBgn0010348	Arf79F	-0.07	1	0	-0.07	1	0	-0.06	1	0	0.13	1	0	0.04	1	0	0.11	1	0	-0.02	1	0	0.12	0.96	0.0177288	0.03	1	0	0.01	1	0	0.01	1	0	-0.03	1	0	0.08	1	0	-0.11	1	0	-0.08	1	0
FBgn0020655	ArfGAP1	-0.04	1	0	-0.23	1	0	-0.26	1	0	0.04	1	0	-0.06	1	0	0.16	1	0	-0.03	1	0	0.13	0.96	0.0177288	0.02	1	0	-0.19	0.7	0.154902	-0.19	0.76	0.119186	-0.1	0.94	0.0268721	0.19	0.9	0.0457575	-0.08	1	0	-0.11	1	0
FBgn0037182	ArfGAP3	-0.08	1	0	-0.08	1	0	-0.11	1	0	0.04	1	0	-0.002	1	0	0.11	1	0	0.03	1	0	0.05	1	0	0.04	1	0	0.02	1	0	-0.12	0.92	0.0362122	0.05	1	0	0.04	1	0	-0.09	1	0	-0.07	1	0
FBgn0037884	Arfip	0.04	1	0	-0.00741	1	0	0.07	1	0	-0.18	1	0	-0.34	0.55	0.259637	0.05	1	0	0.0074	1	0	0.16	0.96	0.0177288	0.09	1	0	-0.03	1	0	0.04	1	0	0.21	0.81	0.091515	0.34	0.66	0.180456	0.1	1	0	0.16	1	0
FBgn0030088	Arfrp1	-0.07	1	0	-0.16	1	0	-0.24	1	0	-0.08	1	0	-0.44	0.56	0.251812	0.11	1	0	-0.08	1	0	0.15	0.96	0.0177288	0.06	1	0	-0.33	0.58	0.236572	-0.32	0.66	0.180456	-0.1	1	0	0.09	1	0	-0.1	1	0	0.02	1	0
FBgn0023535	arg	-0.31	1	0	0.55	1	0	-0.29	1	0	0.32	1	0	0.8	0.17	0.769551	-0.02	1	0	-0.38	1	0	-0.61	0.8	0.09691	-0.26	1	0	0.19	0.91	0.0409586	-0.65	0.12	0.920819	0.06	1	0	-0.55	0.17	0.769551	-0.67	0.05	1.30103	-0.36	0.63	0.200659
FBgn0000116	Argk	-0.34	1	0	0.19	1	0	-1.2	0.29	0.537602	0.08	1	0	0.36	0.68	0.167491	-0.2	1	0	-0.13	1	0	-0.32	0.95	0.0222764	-0.17	1	0	-0.04	1	0	-0.23	0.83	0.0809219	-0.15	0.94	0.0268721	-0.28	0.65	0.187087	0.2	0.94	0.0268721	0.2	0.94	0.0268721
FBgn0017418	ari-1	-0.1	1	0	0.03	1	0	-0.0028	1	0	0.00712	1	0	0.09	0.96	0.0177288	-0.1	1	0	-0.13	1	0	-0.14	0.96	0.0177288	-0.21	1	0	0.07	1	0	0.04	1	0	-0.25	0.41	0.387216	-0.05	1	0	0.12	1	0	0.08	1	0
FBgn0025186	ari-2	-0.03	1	0	0.04	1	0	0.13	1	0	-0.18	1	0	-0.28	0.7	0.154902	0.11	1	0	-0.00239	1	0	0.15	0.96	0.0177288	0.1	1	0	-0.03	1	0	-0.07	1	0	-0.14	0.9	0.0457575	0.19	0.94	0.0268721	-0.09	1	0	-0.04	1	0
FBgn0000115	Arl1	-0.09	1	0	-0.17	1	0	-0.2	1	0	-0.2	1	0	-0.32	0.68	0.167491	0.02	1	0	-0.03	1	0	0.15	0.96	0.0177288	0.07	1	0	-0.04	1	0	-0.17	0.93	0.0315171	0.13	0.95	0.0222764	0.03	1	0	-0.06	1	0	-0.24	0.91	0.0409586
FBgn0004908	Arl2	0.31	1	0	0.14	1	0	0.31	1	0	0.15	1	0	-0.12	1	0	0.37	1	0	0.04	1	0	0.18	0.96	0.0177288	0.07	1	0	0.1	1	0	-0.07	1	0	0.05	1	0	0.28	0.92	0.0362122	0.12	1	0	0.28	1	0
FBgn0039889	Arl4	-0.07	1	0	-0.04	1	0	0.03	1	0	-0.00358	1	0	-0.1	0.98	0.00877392	0.00426	1	0	-0.03	1	0	0.18	0.96	0.0177288	0.06	1	0	-0.05	1	0	0.12	0.97	0.0132283	-0.05	1	0	0.11	0.99	0.00436481	-0.05	1	0	-0.04	1	0
FBgn0034446	Arl6	-1.49	1	0	-0.01	1	0	-3.84	0.89	0.05061	-0.53	1	0	-1.02	0.82	0.0861861	-0.22	1	0	-0.84	1	0	-0.7	0.96	0.0177288	-1.2	1	0	0.49	0.94	0.0268721	1.14	0.53	0.275724	-0.03	1	0	0.14	1	0	0.15	1	0	-0.08	1	0
FBgn0000117	arm	0.01	1	0	-0.07	1	0	-0.02	1	0	-0.1	1	0	-0.07	1	0	0.07	1	0	-0.03	1	0	0.07	1	0	0.03	1	0	-0.07	1	0	-0.08	1	0	-0.05	1	0	0.15	0.96	0.0177288	0.02	1	0	-0.04	1	0
FBgn0041164	armi	-0.08	1	0	-0.13	1	0	-0.05	1	0	0.1	1	0	-0.13	0.9	0.0457575	0.11	1	0	-0.02	1	0	-0.00512	1	0	0.08	1	0	0.01	1	0	-0.11	0.99	0.00436481	0.23	0.77	0.113509	0.72	0.18	0.744727	-0.02	1	0	0.06	1	0
FBgn0011745	Arp1	-0.04	1	0	0.01	1	0	-0.16	1	0	0.03	1	0	-0.00392	1	0	0.11	1	0	0.00253	1	0	0.03	1	0	0.00336	1	0	-0.1	0.95	0.0222764	-0.14	0.89	0.05061	-0.11	0.92	0.0362122	-0.09	0.96	0.0177288	-0.01	1	0	0.02	1	0
FBgn0031050	Arp10	0.13	1	0	0.06	1	0	-0.14	1	0	-0.21	1	0	-0.17	0.9	0.0457575	-0.02	1	0	-0.04	1	0	0.1	1	0	0.13	1	0	-0.02	1	0	-0.09	1	0	-0.04	1	0	0.02	1	0	0.19	1	0	0.05	1	0
FBgn0011742	Arp2	-0.28	1	0	-0.24	1	0	-0.3	0.92	0.0362122	-0.01	1	0	-0.14	0.9	0.0457575	0.02	1	0	-0.03	1	0	0.04	1	0	-0.01	1	0	0.02	1	0	-0.03	1	0	-0.06	1	0	0.2	0.73	0.136677	0.02	1	0	0.02	1	0
FBgn0262716	Arp3	-0.35	0.95	0.0222764	-0.43	1	0	-0.36	0.73	0.136677	0.15	1	0	0.07	1	0	0.05	1	0	0.12	1	0	0.27	0.67	0.173925	0.08	1	0	0.1	0.95	0.0222764	0.01	1	0	-0.02	1	0	0.15	0.97	0.0132283	0.04	1	0	0.01	1	0
FBgn0038576	Arp5	0.04	1	0	-0.07	1	0	-0.02	1	0	-0.24	1	0	-0.32	0.74	0.130768	-0.14	1	0	-0.00406	1	0	0.13	0.96	0.0177288	0.13	1	0	0.12	0.96	0.0177288	0.1	1	0	0.14	0.94	0.0268721	0.22	0.92	0.0362122	0.07	1	0	0.17	1	0
FBgn0011743	Arp53D	1.04	0.35	0.455932	0.7	1	0	1.11	0.16	0.79588	0.00577	1	0	-0.00771	1	0	0.74	1	0	-3.77	1	0	0.18	1	0	-3.61	1	0	0.21	0.81	0.091515	0.29	0.69	0.161151	0.25	0.72	0.142668	0.34	0.46	0.337242	0.3	0.63	0.200659	0.37	0.35	0.455932
FBgn0011741	Arp6	-0.08	1	0	-0.07	1	0	-0.17	1	0	-0.03	1	0	-0.08	1	0	0.04	1	0	0.08	1	0	0.14	0.96	0.0177288	0.06	1	0	0.1	1	0	0.06	1	0	-0.00533	1	0	0.01	1	0	-0.16	1	0	-0.12	1	0
FBgn0030877	Arp8	0.13	1	0	0.06	1	0	0.1	1	0	-0.29	1	0	-0.38	0.52	0.283997	0.02	1	0	-0.06	1	0	0.22	0.96	0.0177288	0.04	1	0	-0.19	0.94	0.0268721	-0.08	1	0	0.13	0.99	0.00436481	0.68	0.55	0.259637	0.4	0.98	0.00877392	-0.08	1	0
FBgn0001961	Arpc1	0.09	1	0	0.06	1	0	-0.08	1	0	0.34	1	0	0.3	0.69	0.161151	0.45	0.92	0.0362122	0.21	1	0	0.17	0.96	0.0177288	0.14	1	0	0.04	1	0	-0.08	0.99	0.00436481	0.06	1	0	0.14	0.96	0.0177288	0.28	0.67	0.173925	0.23	0.81	0.091515
FBgn0032859	Arpc2	-0.28	1	0	-0.27	1	0	-0.22	1	0	-0.08	1	0	-0.27	0.71	0.148742	0.08	1	0	0.02	1	0	0.17	0.96	0.0177288	0.06	1	0	-0.05	1	0	-0.02	1	0	0.00657	1	0	0.43	0.7	0.154902	-0.02	1	0	0.09	1	0
FBgn0038369	Arpc3A	-0.04	1	0	-0.06	1	0	-0.12	1	0	-0.17	1	0	-0.32	0.7	0.154902	-0.12	1	0	-0.08	1	0	0.19	0.96	0.0177288	-0.02	1	0	0.09	1	0	0.01	1	0	0.02	1	0	0.47	0.34	0.468521	0.23	0.98	0.00877392	0.22	1	0
FBgn0065032	Arpc3B	-0.42	1	0	-0.66	1	0	-0.51	0.8	0.09691	0.57	1	0	0.45	0.75	0.124939	-0.16	1	0	0.18	1	0	-0.61	0.93	0.0315171	-0.2	1	0	0.27	0.82	0.0861861	0.21	0.94	0.0268721	0.11	1	0	0.08	1	0	0.06	1	0	0.27	1	0
FBgn0031781	Arpc4	-0.1	1	0	-0.17	1	0	-0.23	1	0	-0.05	1	0	-0.1	1	0	-0.05	1	0	-0.03	1	0	-0.02	1	0	0.02	1	0	-0.1	1	0	-0.13	0.97	0.0132283	-0.11	0.98	0.00877392	0.03	1	0	-0.07	1	0	-0.06	1	0
FBgn0031437	Arpc5	-0.16	1	0	-0.11	1	0	-0.12	1	0	-0.01	1	0	-0.03	1	0	0.00781	1	0	0.05	1	0	0.09	1	0	-0.02	1	0	0.24	0.72	0.142668	0.26	0.72	0.142668	0.22	0.76	0.119186	0.23	0.9	0.0457575	0.16	1	0	0.16	1	0
FBgn0000119	arr	-0.14	1	0	-0.06	1	0	-0.15	1	0	0.02	1	0	0.01	1	0	0.1	1	0	-0.04	1	0	-0.06	1	0	-0.09	1	0	0.05	1	0	0.03	1	0	0.03	1	0	-0.11	0.96	0.0177288	-0.04	1	0	-0.22	0.82	0.0861861
FBgn0000120	Arr1	0.76	0.5	0.30103	0.42	1	0	0.56	0.69	0.161151	0.15	1	0	0.18	0.9	0.0457575	-0.07	1	0	-0.04	1	0	-0.31	0.96	0.0177288	-0.11	1	0	-0.13	0.95	0.0222764	-0.42	0.32	0.49485	0.02	1	0	-0.27	0.5	0.30103	-0.29	0.43	0.366532	-0.22	0.67	0.173925
FBgn0000121	Arr2	0.25	1	0	-0.66	1	0	-0.83	0.88	0.0555173	0.16	1	0	0.19	0.9	0.0457575	-0.18	1	0	-0.03	1	0	-0.34	0.96	0.0177288	-0.13	1	0	-0.25	0.72	0.142668	-0.19	0.87	0.0604807	-0.13	0.94	0.0268721	-0.34	0.35	0.455932	-0.36	0.31	0.508638	-0.28	0.56	0.251812
FBgn0033062	Ars2	-0.00692	1	0	-0.02	1	0	-0.15	1	0	0.02	1	0	-0.14	0.9	0.0457575	0.13	1	0	0.02	1	0	0.05	1	0	0.02	1	0	0.13	0.89	0.05061	-0.00227	1	0	0.02	1	0	0.06	1	0	-0.19	0.99	0.00436481	-0.18	1	0
FBgn0037834	Art1	-0.08	1	0	-0.14	1	0	-0.03	1	0	-0.11	1	0	-0.32	0.6	0.221849	0.06	1	0	-0.04	1	0	0.22	0.96	0.0177288	0.06	1	0	0.05	1	0	0.06	1	0	0.1	0.97	0.0132283	0.62	0.32	0.49485	0.14	1	0	-0.1	1	0
FBgn0031592	Art2	0.64	1	0	0.57	1	0	0.43	1	0	2.14	1	0	2.88	0.24	0.619789	2.53	0.8	0.09691	-0.03	1	0	0.79	0.96	0.0177288	-0.21	1	0	-0.22	0.92	0.0362122	-0.41	0.68	0.167491	-0.32	0.77	0.113509	0.19	1	0	0.17	1	0	0.25	1	0
FBgn0038306	Art3	-0.29	1	0	-0.25	1	0	-0.16	1	0	0.14	1	0	-0.09	0.99	0.00436481	0.11	1	0	0.06	1	0	0.24	0.92	0.0362122	0.08	1	0	0.33	0.63	0.200659	0.7	0.04	1.39794	0.46	0.31	0.508638	0.57	0.59	0.229148	0.32	1	0	0.16	1	0
FBgn0037770	Art4	-0.19	1	0	-0.13	1	0	-0.18	1	0	-0.08	1	0	-0.15	0.9	0.0457575	0.1	1	0	-0.00254	1	0	0.1	0.96	0.0177288	0.01	1	0	-0.07	1	0	0.07	1	0	0.08	1	0	1.01	0.08	1.09691	0.45	0.89	0.05061	0.07	1	0
FBgn0038189	Art6	0.76	1	0	0.64	1	0	0.23	1	0	0.00577	1	0	-2.27	0.9	0.0457575	-2.35	1	0	-0.04	1	0	-0.14	1	0	-2.24	1	0	0.8	0.4	0.39794	0.66	0.64	0.19382	0.53	0.74	0.130768	0.04	1	0	0.08	1	0	0.14	1	0
FBgn0034817	Art7	-0.26	1	0	-0.21	1	0	-0.22	1	0	0.03	1	0	0.06	1	0	0.01	1	0	0.07	1	0	0.07	1	0	0.12	1	0	0.28	0.72	0.142668	0.05	1	0	0.18	0.91	0.0409586	0.42	0.7	0.154902	0.08	1	0	0.04	1	0
FBgn0032329	Art8	-0.12	1	0	-0.1	1	0	0.01	1	0	0.09	1	0	0.08	1	0	0.11	1	0	-0.1	1	0	-0.00684	1	0	0.02	1	0	-0.15	0.99	0.00436481	0.21	0.96	0.0177288	0.05	1	0	0.45	0.92	0.0362122	-0.04	1	0	-0.29	1	0
FBgn0038188	Art9	0.74	1	0	0.72	1	0	0.94	0.89	0.05061	-2.38	1	0	-2.27	0.9	0.0457575	-2.35	1	0	-2.39	1	0	1.22	0.96	0.0177288	-2.24	1	0	-0.24	1	0	0.52	0.91	0.0409586	0.26	1	0	0.32	0.96	0.0177288	0.08	1	0	0.36	1	0
FBgn0029095	aru	-0.22	1	0	-0.18	1	0	-0.4	0.73	0.136677	0.00199	1	0	0.27	0.72	0.142668	-0.14	1	0	-0.00941	1	0	-0.21	0.96	0.0177288	-0.04	1	0	-0.24	0.53	0.275724	-0.2	0.72	0.142668	-0.28	0.35	0.455932	-0.13	1	0	-0.09	1	0	-0.18	1	0
FBgn0036826	arx	0.14	1	0	0.52	1	0	0.45	0.99	0.00436481	-0.25	1	0	-0.46	0.49	0.309804	-0.04	1	0	0.05	1	0	0.34	0.95	0.0222764	0.18	1	0	-0.05	1	0	-0.01	1	0	0.16	0.98	0.00877392	0.55	0.89	0.05061	0.21	1	0	-0.12	1	0
FBgn0058064	ARY	1.03	0.59	0.229148	1.09	0.98	0.00877392	1.18	0.29	0.537602	#N/A	#N/A	#N/A	#N/A	#N/A	#N/A	#N/A	#N/A	#N/A	2.28	1	0	-0.04	1	0	0.08	1	0	0.45	0.32	0.49485	0.61	0.1	1	0.47	0.28	0.552842	0.11	1	0	0.31	0.96	0.0177288	0.58	0.38	0.420216
FBgn0050372	Asap	-0.13	1	0	0.01	1	0	-0.15	1	0	-0.13	1	0	-0.13	0.9	0.0457575	0.04	1	0	0.00609	1	0	0.05	1	0	-0.02	1	0	-0.06	1	0	-0.06	1	0	-0.02	1	0	0.09	0.96	0.0177288	-0.06	1	0	-0.02	1	0
FBgn0039908	Asator	-0.21	1	0	-0.18	1	0	-0.1	1	0	-0.03	1	0	0.23	0.79	0.102373	-0.27	1	0	0.16	1	0	0.11	0.96	0.0177288	0.05	1	0	-0.21	0.58	0.236572	0.02	1	0	-0.26	0.38	0.420216	-0.13	0.97	0.0132283	-0.07	1	0	-0.11	1	0
FBgn0035407	Asciz	0.43	1	0	0.12	1	0	0.19	1	0	-0.31	1	0	-0.28	0.84	0.0757207	0.16	1	0	-0.01	1	0	0.29	0.96	0.0177288	0.00471	1	0	0.00823	1	0	-0.1	1	0	0.15	0.98	0.00877392	0.09	1	0	0.04	1	0	0.23	1	0
FBgn0000137	ase	-0.43	1	0	-0.07	1	0	-0.27	1	0	4.17	0.26	0.585027	4.53	0.12	0.920819	2.92	1	0	-0.56	1	0	-3.74	0.96	0.0177288	-0.36	1	0	-3.32	0.83	0.0809219	0.34	1	0	-3.27	0.85	0.0705811	-0.94	0.96	0.0177288	-1.6	0.99	0.00436481	-1.73	0.98	0.00877392
FBgn0029094	asf1	-0.18	1	0	-0.09	1	0	-0.27	1	0	-0.23	1	0	-0.52	0.26	0.585027	0.14	1	0	-0.02	1	0	0.26	0.96	0.0177288	0.11	1	0	-0.02	1	0	0.05	1	0	-0.03	1	0	0.85	0.44	0.356547	0.05	1	0	-0.13	1	0
FBgn0005386	ash1	-0.18	1	0	-0.04	1	0	-0.13	1	0	-0.1	1	0	-0.3	0.65	0.187087	0.15	1	0	-0.06	1	0	-0.05	1	0	-0.02	1	0	0.06	1	0	0.08	0.97	0.0132283	0.07	0.98	0.00877392	0.17	0.94	0.0268721	-0.03	1	0	-0.03	1	0
FBgn0000139	ash2	-0.14	1	0	-0.00773	1	0	-0.16	1	0	-0.07	1	0	-0.1	0.99	0.00436481	0.06	1	0	-0.02	1	0	0.04	1	0	0.07	1	0	0.06	1	0	0.07	1	0	0.07	1	0	0.13	0.97	0.0132283	-0.1	1	0	-0.04	1	0
FBgn0261004	asl	-0.04	1	0	0.06	1	0	0.09	1	0	-0.11	1	0	-0.38	0.52	0.283997	0.11	1	0	-0.05	1	0	0.15	0.96	0.0177288	0.07	1	0	0.21	0.81	0.091515	0.21	0.86	0.0655015	0.23	0.78	0.107905	0.52	0.29	0.537602	0.21	1	0	0.31	0.83	0.0809219
FBgn0000140	asp	-0.13	1	0	-0.08	1	0	-0.06	1	0	-0.2	1	0	-0.42	0.45	0.346787	0.16	1	0	-0.04	1	0	0.07	1	0	0.00834	1	0	0.28	0.59	0.229148	0.31	0.56	0.251812	0.33	0.39	0.408935	1.21	0.00643	2.19179	0.58	0.61	0.21467	0.27	1	0
FBgn0041607	asparagine-synthetase	-0.92	0.2	0.69897	-0.31	1	0	0.65	0.37	0.431798	0.16	1	0	-0.09	0.97	0.0132283	0.26	1	0	-0.00655	1	0	0.16	0.96	0.0177288	0.15	1	0	-0.54	0.14	0.853872	-0.26	0.79	0.102373	-0.23	0.81	0.091515	0.1	1	0	-0.22	0.97	0.0132283	0.24	0.94	0.0268721
FBgn0034075	Asph	0.03	1	0	-0.01	1	0	0.31	1	0	-0.01	1	0	0.56	0.24	0.619789	-0.55	0.52	0.283997	-0.07	1	0	-0.46	0.7	0.154902	-0.28	1	0	-0.32	0.21	0.677781	0.17	0.78	0.107905	-0.46	0.02	1.69897	-0.13	0.92	0.0362122	0.14	0.98	0.00877392	0.13	1	0
FBgn0034606	ASPP	0.06	1	0	-0.01	1	0	-0.00472	1	0	0.21	1	0	0.41	0.63	0.200659	-0.04	1	0	-0.11	1	0	-0.49	0.95	0.0222764	-0.36	1	0	0.14	0.86	0.0655015	-0.09	0.98	0.00877392	-0.02	1	0	-0.14	0.96	0.0177288	-0.07	1	0	-0.12	1	0
FBgn0034793	asrij	0.08	1	0	0.11	1	0	-0.00212	1	0	-0.21	1	0	-0.22	0.82	0.0861861	-0.06	1	0	-0.05	1	0	0.14	0.96	0.0177288	0.12	1	0	0.02	1	0	-0.05	1	0	0.15	0.87	0.0604807	0.18	0.93	0.0315171	0.06	1	0	0.08	1	0
FBgn0015905	ast	-0.17	1	0	-0.18	1	0	-0.1	1	0	-0.11	1	0	-0.22	0.8	0.09691	0.03	1	0	-0.03	1	0	0.1	0.96	0.0177288	0.06	1	0	0.3	0.69	0.161151	0.24	0.86	0.0655015	0.32	0.61	0.21467	0.42	0.48	0.318759	0.17	1	0	0.26	0.91	0.0409586
FBgn0015591	AstA	-0.25	1	0	-0.09	1	0	-0.51	0.93	0.0315171	0.03	1	0	0.03	1	0	-0.57	1	0	0.45	1	0	-0.15	1	0	0.32	1	0	0.13	0.94	0.0268721	0.03	1	0	-0.09	0.99	0.00436481	0.03	1	0	-0.11	1	0	-0.02	1	0
FBgn0266429	AstA-R1	0.32	1	0	-0.02	1	0	0.18	1	0	0.07	1	0	0.13	1	0	-0.26	1	0	0.04	1	0	-0.14	1	0	-0.21	1	0	-0.3	0.76	0.119186	-0.04	1	0	-0.2	0.92	0.0362122	-0.26	0.96	0.0177288	-0.08	1	0	-0.64	0.51	0.29243
FBgn0039595	AstA-R2	0.24	1	0	0.46	1	0	0.18	1	0	0.46	1	0	0.86	0.38	0.420216	0.1	1	0	-0.05	1	0	-0.37	0.96	0.0177288	-0.12	1	0	0.27	0.82	0.0861861	0.18	0.96	0.0177288	0.27	0.81	0.091515	0.03	1	0	-0.07	1	0	-0.00114	1	0
FBgn0032336	AstC	-0.21	1	0	0.28	1	0	-0.19	1	0	0.43	1	0	0.55	0.44	0.356547	0.13	1	0	0.19	1	0	-0.19	1	0	-0.16	1	0	0.11	0.96	0.0177288	-0.07	1	0	-0.00458	1	0	-0.05	1	0	0.04	1	0	-0.2	1	0
FBgn0032337	AstCC	-0.35	1	0	0.08	1	0	-0.18	1	0	0.03	1	0	0.13	1	0	2.31	1	0	1.19	1	0	-3.21	0.96	0.0177288	-0.69	1	0	-3.93	3.33e-05	4.47756	-3.69	4.61e-05	4.3363	-4.15	6.5e-05	4.18709	-4.38	3.73e-06	5.42829	-6.25	0.000654	3.18442	-4.31	6.67e-06	5.17587
FBgn0036790	AstC-R1	0.00936	1	0	0.15	1	0	0.28	1	0	1.17	0.93	0.0315171	1.19	0.44	0.356547	0.23	1	0	-0.2	1	0	-0.17	1	0	-0.35	1	0	-0.12	1	0	0.26	0.96	0.0177288	0.00881	1	0	-0.05	1	0	0.21	1	0	0.23	1	0
FBgn0036789	AstC-R2	-0.41	1	0	-0.45	1	0	-0.12	1	0	0.57	1	0	0.82	0.4	0.39794	-0.15	1	0	0.28	1	0	-0.44	0.96	0.0177288	-0.44	1	0	0.04	1	0	0.21	0.87	0.0604807	-0.14	0.95	0.0222764	0.05	1	0	0.17	1	0	-0.23	1	0
FBgn0020407	asun	-0.04	1	0	-0.2	1	0	-0.25	1	0	-0.1	1	0	-0.3	0.75	0.124939	0.1	1	0	-0.13	1	0	0.1	1	0	0.02	1	0	0.14	0.99	0.00436481	0.4	0.67	0.173925	0.43	0.53	0.275724	0.27	0.92	0.0362122	0.03	1	0	-0.17	1	0
FBgn0261823	Asx	-0.17	1	0	-0.08	1	0	-0.09	1	0	-0.09	1	0	-0.13	0.9	0.0457575	0.09	1	0	-0.00277	1	0	-0.000117	1	0	-0.09	1	0	0.03	1	0	-0.07	0.99	0.00436481	-0.12	0.88	0.0555173	0.08	0.98	0.00877392	-0.01	1	0	-0.04	1	0
FBgn0031876	Atac1	-0.12	1	0	-0.01	1	0	-0.13	1	0	-0.05	1	0	-0.16	0.94	0.0268721	0.09	1	0	-0.14	1	0	0.13	0.99	0.00436481	0.03	1	0	-0.01	1	0	0.06	1	0	-0.08	1	0	0.25	0.96	0.0177288	0.14	1	0	0.05	1	0
FBgn0032691	Atac2	-0.21	1	0	-0.12	1	0	-0.14	1	0	0.09	1	0	-0.12	0.98	0.00877392	0.14	1	0	-0.16	1	0	-0.00602	1	0	0.01	1	0	-0.16	0.96	0.0177288	-0.03	1	0	0.09	1	0	0.32	0.9	0.0457575	0.12	1	0	0.12	1	0
FBgn0052343	Atac3	-0.13	1	0	-0.03	1	0	-0.2	1	0	-0.15	1	0	-0.36	0.65	0.187087	0.06	1	0	0.06	1	0	0.18	0.96	0.0177288	0.19	1	0	0.05	1	0	0.00122	1	0	0.12	0.97	0.0132283	0.21	0.96	0.0177288	0.01	1	0	0.08	1	0
FBgn0039946	ATbp	-0.26	1	0	-0.31	1	0	0.13	1	0	-0.35	1	0	-0.53	0.51	0.29243	-0.16	1	0	0.03	1	0	0.08	1	0	-0.06	1	0	-0.03	1	0	0.16	0.97	0.0132283	0.09	1	0	0.58	0.81	0.091515	0.31	1	0	0.11	1	0
FBgn0025720	Ate1	-0.05	1	0	-0.1	1	0	-0.1	1	0	-0.18	1	0	-0.2	0.82	0.0861861	0.02	1	0	-0.03	1	0	0.14	0.96	0.0177288	0.12	1	0	-0.08	1	0	-0.1	0.98	0.00877392	-0.03	1	0	-0.02	1	0	-0.03	1	0	-0.12	1	0
FBgn0020762	Atet	0.2	1	0	0.11	1	0	0.26	1	0	0.22	1	0	0.24	0.75	0.124939	-0.29	1	0	0.09	1	0	-0.32	0.95	0.0222764	0.00153	1	0	-0.31	0.25	0.60206	-0.32	0.28	0.552842	-0.2	0.61	0.21467	-0.18	0.81	0.091515	-0.28	0.43	0.366532	-0.25	0.51	0.29243
FBgn0265193	Atf-2	0.06	1	0	0.12	1	0	0.24	1	0	-0.07	1	0	-0.31	0.75	0.124939	0.06	1	0	-0.09	1	0	0.1	1	0	-0.09	1	0	-0.000267	1	0	0.03	1	0	0.09	1	0	0.23	0.95	0.0222764	0.23	1	0	0.16	1	0
FBgn0028550	Atf3	-0.46	1	0	-0.32	1	0	-0.79	0.34	0.468521	0.05	1	0	0.24	0.82	0.0861861	-0.14	1	0	0.08	1	0	-0.44	0.8	0.09691	-0.19	1	0	0.00353	1	0	0.02	1	0	-0.07	1	0	-0.27	0.74	0.130768	-0.36	0.5	0.30103	-0.41	0.32	0.49485
FBgn0033010	Atf6	-0.08	1	0	0.03	1	0	0.04	1	0	0.1	1	0	-0.01	1	0	0.00762	1	0	-0.00466	1	0	0.15	0.96	0.0177288	-0.02	1	0	-0.02	1	0	0.1	0.96	0.0177288	-0.00939	1	0	0.07	0.99	0.00436481	-0.06	1	0	-0.08	1	0
FBgn0260945	Atg1	0.13	1	0	0.17	1	0	0.11	1	0	-0.03	1	0	-0.09	0.98	0.00877392	0.03	1	0	-0.1	1	0	0.06	1	0	-0.02	1	0	-0.1	0.94	0.0268721	-0.08	0.98	0.00877392	-0.06	1	0	0.13	0.93	0.0315171	0.03	1	0	0.09	1	0
FBgn0040780	Atg10	0.18	1	0	-0.07	1	0	-0.15	1	0	0.42	1	0	0.17	0.98	0.00877392	0.23	1	0	0.05	1	0	0.38	0.96	0.0177288	-0.1	1	0	0.1	1	0	-0.17	1	0	-0.09	1	0	0.18	1	0	0.17	1	0	-0.07	1	0
FBgn0030960	Atg101	-0.19	1	0	-0.04	1	0	-0.23	1	0	0.11	1	0	0.12	0.93	0.0315171	-0.03	1	0	0.12	1	0	-0.01	1	0	0.12	1	0	-0.09	1	0	0.07	1	0	-0.16	0.88	0.0555173	-0.02	1	0	0.04	1	0	0.12	1	0
FBgn0036255	Atg12	-0.09	1	0	-0.36	1	0	-0.09	1	0	-0.08	1	0	0.05	1	0	0.23	1	0	0.04	1	0	0.31	0.96	0.0177288	0.08	1	0	0.21	0.9	0.0457575	0.25	0.87	0.0604807	0.17	0.94	0.0268721	0.07	1	0	-0.1	1	0	-0.02	1	0
FBgn0261108	Atg13	0.00196	1	0	-0.06	1	0	0.16	1	0	-0.05	1	0	-0.12	0.9	0.0457575	-0.00294	1	0	0.04	1	0	0.17	0.96	0.0177288	0.0014	1	0	0.09	0.96	0.0177288	-0.09	0.97	0.0132283	0.1	0.94	0.0268721	-0.00341	1	0	-0.09	1	0	-0.09	1	0
FBgn0039636	Atg14	0.1	1	0	0.09	1	0	-0.00347	1	0	-0.09	1	0	-0.15	0.9	0.0457575	-0.14	1	0	-0.08	1	0	-0.02	1	0	0.02	1	0	-0.08	1	0	0.05	1	0	0.16	0.87	0.0604807	-0.03	1	0	-0.13	1	0	-0.11	1	0
FBgn0039705	Atg16	0.05	1	0	0.13	1	0	-0.12	1	0	-0.23	1	0	-0.29	0.69	0.161151	0.06	1	0	-0.14	1	0	0.2	0.96	0.0177288	0.02	1	0	0.04	1	0	0.08	1	0	0.14	0.94	0.0268721	0.04	1	0	0.04	1	0	0.03	1	0
FBgn0037363	Atg17	-0.02	1	0	0.07	1	0	-0.03	1	0	0.06	1	0	0.05	1	0	0.11	1	0	-0.07	1	0	-0.1	0.96	0.0177288	-0.05	1	0	-0.16	0.77	0.113509	-0.13	0.91	0.0409586	-0.22	0.55	0.259637	-0.05	1	0	-0.13	1	0	-0.18	1	0
FBgn0035850	Atg18a	0.06	1	0	0.14	1	0	0.05	1	0	-0.04	1	0	0.03	1	0	0.05	1	0	-0.03	1	0	-5.84e-05	1	0	0.00248	1	0	-0.00923	1	0	-0.19	0.77	0.113509	-0.08	0.98	0.00877392	-0.0086	1	0	-0.07	1	0	-0.09	1	0
FBgn0032935	Atg18b	0.08	1	0	0.09	1	0	-0.05	1	0	-0.34	1	0	-0.37	0.6	0.221849	-0.34	1	0	-0.16	1	0	-0.05	1	0	-0.13	1	0	-0.24	0.68	0.167491	-0.4	0.29	0.537602	-0.28	0.55	0.259637	0.00605	1	0	-0.13	1	0	-0.05	1	0
FBgn0044452	Atg2	0.24	1	0	0.19	1	0	0.28	1	0	0.07	1	0	0.09	0.98	0.00877392	0.09	1	0	0.08	1	0	-0.12	0.96	0.0177288	-0.04	1	0	-0.04	1	0	-0.03	1	0	-0.08	0.95	0.0222764	-0.05	1	0	-0.000203	1	0	-0.06	1	0
FBgn0036813	Atg3	0.06	1	0	-0.07	1	0	-0.16	1	0	0.06	1	0	-0.03	1	0	0.14	1	0	0.00177	1	0	0.06	1	0	0.04	1	0	0.13	0.91	0.0409586	-0.02	1	0	0.05	1	0	-0.16	0.95	0.0222764	-0.22	0.91	0.0409586	-0.06	1	0
FBgn0031298	Atg4a	0.18	1	0	0.16	1	0	0.08	1	0	0.04	1	0	0.06	1	0	0.02	1	0	0.08	1	0	0.08	0.97	0.0132283	0.03	1	0	-0.18	0.86	0.0655015	-0.19	0.87	0.0604807	-0.18	0.85	0.0705811	-0.01	1	0	-0.06	1	0	-0.13	1	0
FBgn0038325	Atg4b	-0.1	1	0	-0.07	1	0	-0.00157	1	0	-0.17	1	0	-0.24	0.72	0.142668	0.03	1	0	-0.11	1	0	0.03	1	0	-0.1	1	0	-0.04	1	0	-0.11	0.97	0.0132283	-0.26	0.66	0.180456	0.03	1	0	0.04	1	0	-0.15	1	0
FBgn0029943	Atg5	-0.02	1	0	-0.11	1	0	0.02	1	0	-0.15	1	0	-0.22	0.84	0.0757207	-0.13	1	0	0.1	1	0	0.23	0.96	0.0177288	0.17	1	0	-0.21	0.87	0.0604807	-0.02	1	0	-0.25	0.77	0.113509	0.15	1	0	-0.04	1	0	-0.04	1	0
FBgn0264325	Atg6	0.05	1	0	0.12	1	0	-0.13	1	0	-0.01	1	0	-0.07	1	0	0.03	1	0	0.03	1	0	-0.05	1	0	-0.1	1	0	-0.04	1	0	0.03	1	0	0.04	1	0	-0.05	1	0	0.000558	1	0	0.08	1	0
FBgn0034366	Atg7	0.13	1	0	0.00536	1	0	0.3	1	0	-0.18	1	0	-0.33	0.67	0.173925	0.00732	1	0	0.02	1	0	0.17	0.96	0.0177288	-0.04	1	0	-0.02	1	0	-0.02	1	0	-0.06	1	0	0.26	0.94	0.0268721	0.11	1	0	0.05	1	0
FBgn0052672	Atg8a	-0.00947	1	0	0.19	1	0	-0.05	1	0	0.03	1	0	0.19	0.84	0.0757207	-0.2	1	0	-0.01	1	0	-0.12	0.96	0.0177288	-0.13	1	0	-0.04	1	0	0.01	1	0	-0.15	0.8	0.09691	-0.05	1	0	0.03	1	0	0.06	1	0
FBgn0038539	Atg8b	1.03	0.43	0.366532	0.9	1	0	1.16	0.18	0.744727	-0.00137	1	0	-3.14	0.84	0.0757207	0.42	1	0	2.28	1	0	3.01	0.96	0.0177288	0.08	1	0	0.41	0.38	0.420216	0.31	0.7	0.154902	0.38	0.43	0.366532	0.16	0.92	0.0362122	0.44	0.14	0.853872	0.42	0.15	0.823909
FBgn0034110	Atg9	0.15	1	0	0.24	1	0	-0.04	1	0	-0.09	1	0	0.03	1	0	-0.14	1	0	-0.08	1	0	-0.22	0.92	0.0362122	-0.14	1	0	-0.12	0.92	0.0362122	-0.2	0.7	0.154902	-0.08	0.97	0.0132283	-0.24	0.91	0.0409586	-0.12	1	0	-0.05	1	0
FBgn0032422	atilla	0.12	1	0	0.6	1	0	-0.43	1	0	-0.15	1	0	0.03	1	0	-0.38	1	0	-0.07	1	0	-0.33	0.96	0.0177288	-0.19	1	0	-0.29	0.33	0.481486	-0.16	0.83	0.0809219	-0.13	0.87	0.0604807	-0.13	0.96	0.0177288	-0.04	1	0	-0.07	1	0
FBgn0036995	atk	1.01	0.71	0.148742	0.76	1	0	0.73	0.88	0.0555173	1.24	1	0	-0.68	0.9	0.0457575	-0.31	1	0	0.91	1	0	0.8	0.96	0.0177288	0.78	1	0	-0.83	0.1	1	-1.04	0.02	1.69897	-0.91	0.06	1.22185	0.67	0.54	0.267606	0.9	0.24	0.619789	0.67	0.53	0.275724
FBgn0039213	atl	-0.01	1	0	0.04	1	0	-0.1	1	0	0.05	1	0	0.12	0.9	0.0457575	0.05	1	0	0.06	1	0	-0.02	1	0	-0.00411	1	0	-0.01	1	0	-0.06	1	0	-0.06	1	0	-0.15	0.97	0.0132283	-0.02	1	0	-0.05	1	0
FBgn0010750	atms	-0.07	1	0	0.02	1	0	-0.03	1	0	-0.2	1	0	-0.22	0.81	0.091515	0.05	1	0	-0.06	1	0	0.22	0.96	0.0177288	0.08	1	0	0.02	1	0	0.02	1	0	-0.00701	1	0	0.1	1	0	-0.1	1	0	-0.07	1	0
FBgn0010433	ato	0.19	1	0	-0.16	1	0	0.46	1	0	1.7	1	0	1.45	0.82	0.0861861	1.57	1	0	-3.24	1	0	-0.99	0.98	0.00877392	-0.69	1	0	0.33	1	0	-3.35	0.88	0.0555173	-3.29	0.86	0.0655015	-1.89	0.9	0.0457575	-1.7	1	0	-1.84	1	0
FBgn0052446	Atox1	-0.04	1	0	-0.05	1	0	-0.1	1	0	-0.02	1	0	-0.14	0.9	0.0457575	0.09	1	0	-0.05	1	0	0.22	0.96	0.0177288	0.21	1	0	-0.01	1	0	0.07	1	0	-0.02	1	0	-0.03	1	0	0.02	1	0	-0.03	1	0
FBgn0030343	ATP7	0.01	1	0	-0.07	1	0	0.1	1	0	-0.00891	1	0	-0.08	0.99	0.00436481	0.13	1	0	-0.11	1	0	0.00292	1	0	0.00526	1	0	0.11	0.92	0.0362122	0.04	1	0	0.13	0.87	0.0604807	0.04	1	0	0.03	1	0	0.08	1	0
FBgn0037989	ATP8B	-0.12	1	0	-0.17	1	0	-0.17	1	0	0.09	1	0	0.33	0.68	0.167491	-0.36	1	0	0.19	1	0	-0.3	0.96	0.0177288	0.04	1	0	0.000598	1	0	-0.02	1	0	-0.08	0.97	0.0132283	-0.15	0.89	0.05061	-0.17	0.9	0.0457575	-0.15	0.97	0.0132283
FBgn0002921	Atpalpha	-0.07	1	0	-0.003	1	0	-0.16	1	0	0.03	1	0	0.17	0.9	0.0457575	-0.02	1	0	-0.04	1	0	-0.25	0.96	0.0177288	-0.15	1	0	0.05	1	0	-0.07	1	0	-0.15	0.93	0.0315171	-0.16	0.85	0.0705811	0.00694	1	0	-0.05	1	0
FBgn0020236	ATPCL	0.16	1	0	-0.13	1	0	-0.04	1	0	0.19	1	0	0.18	0.84	0.0757207	-0.00579	1	0	-0.18	1	0	-0.29	0.94	0.0268721	-0.14	1	0	-0.0092	1	0	-0.37	0.37	0.431798	0.04	1	0	-0.41	0.14	0.853872	-0.47	0.08	1.09691	-0.31	0.43	0.366532
FBgn0019644	ATPsyn-b	-0.09	1	0	-0.06	1	0	-0.42	0.81	0.091515	-0.02	1	0	0.34	0.6	0.221849	-0.26	1	0	-0.1	1	0	-0.25	0.96	0.0177288	-0.1	1	0	0.04	1	0	-0.02	1	0	-0.16	0.92	0.0362122	-0.22	0.62	0.207608	0.31	0.27	0.568636	0.27	0.37	0.431798
FBgn0010217	ATPsyn-beta	-0.33	1	0	-0.15	1	0	-0.76	0.5	0.30103	0.1	1	0	0.38	0.68	0.167491	-0.3	1	0	-0.04	1	0	-0.21	0.96	0.0177288	-0.1	1	0	-0.08	1	0	0.16	0.95	0.0222764	-0.38	0.4	0.39794	-0.17	0.93	0.0315171	0.26	0.8	0.09691	0.22	0.92	0.0362122
FBgn0016119	ATPsyn-Cf6	-0.18	1	0	-0.05	1	0	-0.44	0.8	0.09691	0.13	1	0	0.27	0.71	0.148742	-0.2	1	0	-0.02	1	0	-0.21	0.96	0.0177288	-0.11	1	0	0.2	0.81	0.091515	0.00947	1	0	-0.05	1	0	-0.03	1	0	0.28	0.86	0.0655015	0.17	1	0
FBgn0016120	ATPsyn-d	-0.32	1	0	-0.13	1	0	-0.56	0.51	0.29243	0.09	1	0	0.35	0.58	0.236572	-0.25	1	0	-0.09	1	0	-0.25	0.96	0.0177288	-0.18	1	0	0.11	0.97	0.0132283	-0.08	1	0	-0.13	0.94	0.0268721	-0.04	1	0	0.35	0.66	0.180456	0.26	0.88	0.0555173
FBgn0020235	ATPsyn-gamma	-0.29	1	0	-0.12	1	0	-0.64	0.4	0.39794	-0.02	1	0	0.35	0.57	0.244125	-0.28	1	0	-0.06	1	0	-0.22	0.96	0.0177288	-0.05	1	0	0.04	1	0	0.00314	1	0	-0.3	0.61	0.21467	-0.08	1	0	0.46	0.26	0.585027	0.35	0.52	0.283997
FBgn0012042	AttA	-0.28	1	0	-0.14	1	0	-0.65	0.87	0.0604807	-1.82	0.89	0.05061	0.97	0.8	0.09691	-2.85	0.14	0.853872	1	1	0	1.65	0.08	1.09691	1.7	0.16	0.79588	-5.96	2.04e-08	7.69037	-6.44	1.5e-09	8.82391	-5.31	1.27e-06	5.8962	0.18	1	0	1.93	3.34e-06	5.47625	1.66	0.000186	3.73049
FBgn0041581	AttB	-1.1	0.69	0.161151	-0.6	1	0	-1.06	0.55	0.259637	-2.68	0.57	0.244125	0.00617	1	0	-2.56	0.75	0.124939	1.02	1	0	1.39	0.47	0.327902	1.66	0.59	0.229148	-5.48	1.85e-08	7.73283	-5.81	2.66e-09	8.57512	-5.51	1.84e-08	7.73518	0.31	0.92	0.0362122	2.27	1.62e-11	10.7905	2.03	5.11e-09	8.29158
FBgn0041579	AttC	-0.16	1	0	0.11	1	0	-0.43	1	0	-1.49	1	0	0.8	0.9	0.0457575	-4.24	0.02	1.69897	-0.00111	1	0	0.17	1	0	0.69	1	0	-6.07	4.76e-11	10.3224	-6.3	1.34e-11	10.8729	-5.38	8.83e-09	8.05404	0.16	1	0	1.93	5.59e-07	6.25259	1.32	0.00388	2.41117
FBgn0038530	AttD	-2.13	0.05	1.30103	-2.67	0.00512	2.29073	-2.51	0.00443	2.3536	0.25	1	0	-1.25	0.85	0.0705811	-0.81	1	0	1.88	1	0	1.8	0.96	0.0177288	0.17	1	0	1.15	0.83	0.0809219	2.09	0.46	0.337242	1.15	0.84	0.0757207	-0.86	0.81	0.091515	2.37	0.000473	3.32514	1.76	0.03	1.52288
FBgn0067783	att-ORFA	-0.11	1	0	0.17	1	0	0.02	1	0	-0.01	1	0	-0.00738	1	0	-0.09	1	0	-0.02	1	0	0.01	1	0	-0.1	1	0	-0.02	1	0	0.00409	1	0	0.09	0.95	0.0222764	0.07	0.99	0.00436481	-0.15	0.95	0.0222764	-0.06	1	0
FBgn0067782	att-ORFB	1	0.87	0.0604807	0.31	1	0	0.88	0.81	0.091515	#N/A	#N/A	#N/A	#N/A	#N/A	#N/A	#N/A	#N/A	#N/A	0.82	1	0	1.91	0.96	0.0177288	1.94	1	0	0.23	0.91	0.0409586	0.1	1	0	0.46	0.46	0.337242	0.32	0.92	0.0362122	0.42	0.86	0.0655015	0.42	0.85	0.0705811
FBgn0019637	Atu	-0.03	1	0	0.16	1	0	-0.1	1	0	-0.16	1	0	-0.23	0.79	0.102373	0.1	1	0	0.04	1	0	0.06	1	0	-0.02	1	0	0.02	1	0	-0.06	1	0	0.03	1	0	0.25	0.91	0.0409586	-0.02	1	0	-0.04	1	0
FBgn0029907	Atx-1	-0.8	1	0	-0.71	1	0	-0.43	1	0	-1.24	1	0	-0.09	1	0	-1.17	1	0	0.37	1	0	0.05	1	0	0.39	1	0	1.77	0.33	0.481486	1.42	0.61	0.21467	0.98	0.81	0.091515	-0.03	1	0	0.55	1	0	1.3	0.33	0.481486
FBgn0041188	Atx2	0.05	1	0	0.00514	1	0	0.18	1	0	0.15	1	0	0.19	0.84	0.0757207	0.25	1	0	-0.03	1	0	-0.18	0.96	0.0177288	-0.07	1	0	0.14	0.94	0.0268721	-0.1	0.98	0.00877392	-0.09	1	0	-0.16	0.93	0.0315171	0.05	1	0	-0.2	0.96	0.0177288
FBgn0031420	Atxn7	0.03	1	0	-0.02	1	0	-0.03	1	0	-0.14	1	0	-0.18	0.9	0.0457575	0.02	1	0	-0.1	1	0	-0.16	0.96	0.0177288	-0.05	1	0	0.01	1	0	-0.03	1	0	0.00165	1	0	0.09	1	0	0.03	1	0	0.04	1	0
FBgn0000146	aub	0.21	1	0	0.13	1	0	0.18	1	0	0.01	1	0	-0.06	1	0	-0.17	1	0	-0.11	1	0	-0.12	0.96	0.0177288	-0.17	1	0	0.41	0.29	0.537602	0.02	1	0	0.25	0.72	0.142668	0.76	0.45	0.346787	0.41	0.98	0.00877392	0.25	1	0
FBgn0000147	aurA	0.49	0.95	0.0222764	0.44	1	0	0.51	0.71	0.148742	-0.28	1	0	-0.52	0.32	0.49485	0.22	1	0	0.00465	1	0	0.21	0.96	0.0177288	0.1	1	0	0.29	0.58	0.236572	0.16	0.92	0.0362122	0.3	0.55	0.259637	0.7	0.06	1.22185	0.48	0.45	0.346787	0.42	0.55	0.259637
FBgn0024227	aurB	0.08	1	0	-0.01	1	0	0.07	1	0	-0.47	1	0	-0.72	0.24	0.619789	0.1	1	0	-0.18	1	0	0.09	1	0	-0.2	1	0	0.41	0.77	0.113509	0.4	0.83	0.0809219	0.47	0.7	0.154902	0.92	0.48	0.318759	0.16	1	0	-0.12	1	0
FBgn0032104	aust	0.1	1	0	0.49	1	0	0.15	1	0	-2.38	1	0	0.83	0.99	0.00436481	-2.35	1	0	#N/A	#N/A	#N/A	#N/A	#N/A	#N/A	#N/A	#N/A	#N/A	0.1	1	0	0.18	0.97	0.0132283	0.09	1	0	-0.13	1	0	0.32	1	0	0.22	1	0
FBgn0037218	aux	-0.2	1	0	-0.16	1	0	-0.16	1	0	-0.1	1	0	-0.06	1	0	0.03	1	0	-0.08	1	0	-0.12	0.96	0.0177288	-0.18	1	0	-0.09	0.96	0.0177288	-0.08	0.99	0.00436481	-0.04	1	0	0.08	0.99	0.00436481	0.02	1	0	0.04	1	0
FBgn0050476	ave	-0.04	1	0	-0.16	1	0	-0.2	1	0	-0.35	1	0	-0.5	0.49	0.309804	-0.2	1	0	-0.14	1	0	0.39	0.89	0.05061	0.08	1	0	-0.33	0.46	0.337242	0.19	0.86	0.0655015	-0.08	1	0	-0.02	1	0	0.22	1	0	-0.14	1	0
FBgn0030410	Aven	-0.4	1	0	-0.23	1	0	-0.41	1	0	-0.27	1	0	-0.36	0.84	0.0757207	0.1	1	0	-0.1	1	0	-0.24	0.96	0.0177288	-0.09	1	0	0.07	1	0	-0.03	1	0	0.06	1	0	0.12	1	0	-0.26	1	0	-0.03	1	0
FBgn0000150	awd	-0.14	1	0	-0.22	1	0	-0.37	0.98	0.00877392	-0.03	1	0	-0.0053	1	0	0.08	1	0	0.02	1	0	0.11	0.99	0.00436481	0.02	1	0	-0.14	0.94	0.0268721	-0.34	0.55	0.259637	-0.13	0.95	0.0222764	-0.02	1	0	0.08	1	0	0.04	1	0
FBgn0013751	Awh	-0.15	1	0	-0.00836	1	0	0.07	1	0	0.05	1	0	0.44	0.9	0.0457575	-0.67	1	0	-0.33	1	0	-0.28	1	0	-0.09	1	0	-0.32	0.77	0.113509	-0.82	0.1	1	-0.04	1	0	-0.11	1	0	-0.11	1	0	-0.3	1	0
FBgn0026597	Axn	-0.14	1	0	-0.09	1	0	-0.11	1	0	-0.07	1	0	-0.15	0.9	0.0457575	0.12	1	0	-0.06	1	0	0.06	1	0	-0.03	1	0	0.02	1	0	0.1	0.97	0.0132283	0.14	0.87	0.0604807	0.21	0.89	0.05061	0.07	1	0	-0.04	1	0
FBgn0262870	axo	0.11	1	0	-0.07	1	0	-0.12	1	0	0.18	1	0	0.44	0.41	0.387216	-0.12	1	0	0.02	1	0	-0.49	0.67	0.173925	-0.21	1	0	-0.08	0.96	0.0177288	-0.2	0.68	0.167491	-0.05	1	0	-0.2	0.74	0.130768	-0.12	1	0	-0.16	0.9	0.0457575
FBgn0000152	Axs	0.07	1	0	0.02	1	0	-0.09	1	0	-0.21	1	0	-0.27	0.8	0.09691	0.01	1	0	0.13	1	0	0.2	0.96	0.0177288	0.06	1	0	-0.27	0.51	0.29243	-0.05	1	0	-0.2	0.74	0.130768	0.08	1	0	0.06	1	0	0.08	1	0
FBgn0261647	Axud1	-0.09	1	0	-0.19	1	0	-0.15	1	0	-0.16	1	0	-0.14	0.9	0.0457575	0.07	1	0	-0.06	1	0	0.06	1	0	-0.05	1	0	-0.15	0.93	0.0315171	-0.1	0.99	0.00436481	-0.1	0.97	0.0132283	0.17	0.96	0.0177288	0.03	1	0	-0.13	1	0
FBgn0025185	az2	-0.18	1	0	-0.01	1	0	-0.04	1	0	-0.27	1	0	-0.45	0.59	0.229148	0.13	1	0	-0.09	1	0	0.18	0.96	0.0177288	0.07	1	0	-0.22	0.94	0.0268721	0.2	0.96	0.0177288	0.18	0.95	0.0222764	0.38	0.92	0.0362122	-0.000708	1	0	0.04	1	0
FBgn0000153	b	0.44	1	0	-0.14	1	0	0.82	0.65	0.187087	-0.38	1	0	0.08	1	0	-1	0.00158	2.80134	-0.53	1	0	-1.24	0.02	1.69897	-0.6	1	0	-0.51	0.06	1.22185	-0.47	0.13	0.886057	-0.62	0.00929	2.03198	-0.73	0.000877	3.057	-0.19	0.97	0.0132283	-0.43	0.18	0.744727
FBgn0023407	B4	-0.05	1	0	-0.09	1	0	-0.04	1	0	-0.01	1	0	-0.07	1	0	-0.04	1	0	-0.02	1	0	-0.05	1	0	-0.1	1	0	0.07	0.99	0.00436481	-0.03	1	0	0.00228	1	0	-0.1	1	0	-0.19	1	0	-0.21	0.98	0.00877392
FBgn0004587	B52	-0.26	1	0	-0.11	1	0	-0.16	1	0	0.02	1	0	0.00251	1	0	0.08	1	0	-0.09	1	0	-0.06	1	0	-0.01	1	0	0.03	1	0	0.07	1	0	-0.02	1	0	0.08	0.97	0.0132283	-0.1	1	0	-0.07	1	0
FBgn0024897	b6	0.14	1	0	-0.15	1	0	0.33	1	0	-3.42	0.72	0.142668	1.7	0.37	0.431798	-2.68	0.91	0.0409586	-1.41	1	0	-0.83	0.96	0.0177288	-0.35	1	0	0.45	0.93	0.0315171	0.4	0.97	0.0132283	0.31	0.98	0.00877392	-0.13	1	0	0.49	1	0	0.26	1	0
FBgn0004870	bab1	0.41	1	0	0.16	1	0	0.29	1	0	-0.46	1	0	0.38	0.9	0.0457575	-0.16	1	0	0.4	1	0	-0.17	1	0	-0.17	1	0	-0.08	1	0	-0.55	0.5	0.30103	-0.37	0.73	0.136677	-0.01	1	0	-0.22	1	0	-0.00536	1	0
FBgn0025525	bab2	-0.02	1	0	-0.17	1	0	0.07	1	0	0.35	1	0	0.64	0.22	0.657577	-0.03	1	0	0.28	1	0	-0.24	0.96	0.0177288	0.14	1	0	0.00553	1	0	-0.00802	1	0	-0.06	1	0	-0.1	0.96	0.0177288	-0.11	1	0	-0.24	0.55	0.259637
FBgn0011300	babo	-0.28	1	0	-0.13	1	0	-0.2	1	0	0.11	1	0	0.14	0.9	0.0457575	0.07	1	0	0.01	1	0	0.02	1	0	-0.04	1	0	-0.03	1	0	-0.03	1	0	-0.14	0.87	0.0604807	-0.15	0.96	0.0177288	-0.02	1	0	-0.26	0.79	0.102373
FBgn0034724	babos	-0.06	1	0	-0.18	1	0	0.09	1	0	0.06	1	0	0.19	0.84	0.0757207	-0.13	1	0	-0.06	1	0	-0.37	0.91	0.0409586	-0.1	1	0	-0.34	0.19	0.721246	-0.17	0.82	0.0861861	-0.3	0.31	0.508638	-0.01	1	0	-0.03	1	0	0.03	1	0
FBgn0031453	Bacc	-0.04	1	0	0.2	1	0	0.08	1	0	0.29	1	0	0.32	0.65	0.187087	0.15	1	0	-0.17	1	0	-0.24	0.81	0.091515	-0.13	1	0	0.27	0.56	0.251812	0.09	0.99	0.00436481	0.14	0.89	0.05061	-0.12	0.96	0.0177288	-0.11	1	0	-0.14	1	0
FBgn0032049	Bace	-4.01	0	#NUM!	-3.72	0	#NUM!	-4.84	0	#NUM!	0.63	0.34	0.468521	0.42	0.55	0.259637	0.2	1	0	0.12	1	0	-0.31	0.96	0.0177288	-0.00886	1	0	0.12	0.99	0.00436481	-0.21	0.92	0.0362122	-0.29	0.73	0.136677	0.67	0.000264	3.5784	0.34	0.31	0.508638	0.01	1	0
FBgn0031977	baf	0.04	1	0	0.04	1	0	-0.03	1	0	-0.17	1	0	-0.25	0.72	0.142668	-0.00479	1	0	-0.13	1	0	0.14	0.96	0.0177288	0.00365	1	0	-0.48	0.15	0.823909	-0.24	0.77	0.113509	-0.22	0.77	0.113509	0.12	0.99	0.00436481	-0.00472	1	0	-0.00138	1	0
FBgn0045866	bai	0.02	1	0	-0.02	1	0	-0.19	1	0	0.17	1	0	0.07	1	0	0.16	1	0	0.02	1	0	0.11	0.97	0.0132283	0.09	1	0	-0.01	1	0	-0.06	1	0	-0.07	0.99	0.00436481	-0.11	0.96	0.0177288	-0.12	1	0	-0.03	1	0
FBgn0260960	Baldspot	0.25	1	0	0.13	1	0	-0.08	1	0	0.25	1	0	0.21	0.79	0.102373	0.08	1	0	0.1	1	0	-0.08	0.97	0.0132283	-0.02	1	0	-0.02	1	0	-0.14	0.93	0.0315171	0.06	1	0	-0.18	0.92	0.0362122	-0.22	0.92	0.0362122	-0.11	1	0
FBgn0027889	ball	0.000133	1	0	0.11	1	0	0.16	1	0	-0.2	1	0	-0.53	0.28	0.552842	0.03	1	0	0.07	1	0	0.27	0.69	0.161151	0.13	1	0	0.09	1	0	-0.2	0.87	0.0604807	-0.09	0.99	0.00436481	0.77	0.02	1.69897	0.27	0.94	0.0268721	0.16	1	0
FBgn0000158	bam	-0.09	1	0	0.58	1	0	-0.02	1	0	-0.45	1	0	-0.81	0.07	1.1549	-0.11	1	0	-0.29	1	0	-0.05	1	0	-0.29	1	0	-0.49	0.89	0.05061	0.2	1	0	0.24	1	0	2.14	0.01	2	1.2	0.51	0.29243	0.64	1	0
FBgn0004862	bap	0.1	1	0	0.55	1	0	0.19	1	0	0.51	1	0	1.02	0.71	0.148742	0.76	1	0	0.51	1	0	0.06	1	0	0.17	1	0	-0.4	0.92	0.0362122	-0.69	0.74	0.130768	-0.55	0.81	0.091515	0.13	1	0	0.21	1	0	0.13	1	0
FBgn0042085	Bap170	-0.25	1	0	-0.09	1	0	-0.23	1	0	-0.14	1	0	-0.26	0.75	0.124939	0.19	1	0	-0.08	1	0	-0.04	1	0	-0.06	1	0	0.11	0.99	0.00436481	0.09	1	0	0.04	1	0	0.42	0.57	0.244125	0.21	1	0	-0.09	1	0
FBgn0025716	Bap55	-0.09	1	0	-0.06	1	0	-0.2	1	0	-0.23	1	0	-0.3	0.64	0.19382	0.04	1	0	0.01	1	0	0.22	0.9	0.0457575	0.05	1	0	0.11	0.98	0.00877392	-0.03	1	0	0.23	0.78	0.107905	0.29	0.93	0.0315171	-0.12	1	0	0.000795	1	0
FBgn0025463	Bap60	-0.00858	1	0	0.03	1	0	-0.03	1	0	-0.16	1	0	-0.26	0.7	0.154902	0.12	1	0	-0.06	1	0	0.16	0.96	0.0177288	0.07	1	0	-0.15	0.92	0.0362122	-0.06	1	0	-0.03	1	0	0.37	0.73	0.136677	-0.04	1	0	-0.18	1	0
FBgn0037081	barc	0.08	1	0	-0.05	1	0	0.03	1	0	-0.08	1	0	-0.24	0.76	0.119186	0.05	1	0	0.1	1	0	0.16	0.96	0.0177288	0.08	1	0	0.03	1	0	0.16	0.84	0.0757207	0.00227	1	0	0.09	1	0	-0.07	1	0	-0.08	1	0
FBgn0014127	barr	-0.00403	1	0	0.16	1	0	0.16	1	0	-0.35	1	0	-0.41	0.49	0.309804	0.11	1	0	0.00535	1	0	0.12	0.96	0.0177288	0.07	1	0	0.2	0.83	0.0809219	0.21	0.85	0.0705811	0.2	0.82	0.0861861	0.56	0.2	0.69897	0.2	1	0	0.25	0.98	0.00877392
FBgn0000163	baz	-0.17	1	0	-0.17	1	0	-0.19	1	0	-0.01	1	0	0.00124	1	0	-0.07	1	0	0.02	1	0	0.04	1	0	-0.05	1	0	-0.21	0.73	0.136677	-0.22	0.74	0.130768	-0.28	0.46	0.337242	-0.11	0.96	0.0177288	-0.03	1	0	-0.09	1	0
FBgn0033844	bbc	-0.09	1	0	-0.09	1	0	0.00881	1	0	-0.06	1	0	-0.1	0.95	0.0222764	-0.02	1	0	0.04	1	0	0.07	0.99	0.00436481	0.00341	1	0	0.01	1	0	-0.01	1	0	0.06	1	0	-0.00454	1	0	-0.02	1	0	-0.1	1	0
FBgn0087007	bbg	-0.18	1	0	-0.11	1	0	-0.16	1	0	0.31	1	0	0.41	0.42	0.376751	0.13	1	0	0.26	1	0	-0.15	0.96	0.0177288	-0.00605	1	0	0.21	0.61	0.21467	-0.08	0.99	0.00436481	-0.07	0.99	0.00436481	0.04	1	0	-0.17	0.89	0.05061	-0.16	0.91	0.0409586
FBgn0035741	BBS1	-0.29	1	0	0.35	1	0	0.18	1	0	-0.82	1	0	-2.07	0.63	0.200659	-0.69	1	0	-2.39	1	0	1.22	0.96	0.0177288	1.02	1	0	0.61	0.61	0.21467	0.64	0.63	0.200659	0.34	0.91	0.0409586	-0.39	0.94	0.0268721	-0.28	1	0	-0.71	0.67	0.173925
FBgn0033578	BBS4	2.34	0.57	0.244125	1.46	1	0	1.92	0.65	0.187087	-0.17	1	0	-0.33	1	0	-1.07	1	0	-0.19	1	0	-1	0.96	0.0177288	-0.66	1	0	0.86	0.44	0.356547	0.2	1	0	0.48	0.85	0.0705811	-0.22	1	0	-0.36	1	0	-0.17	1	0
FBgn0031255	BBS8	0.61	1	0	1.13	1	0	0.09	1	0	-1.22	1	0	-0.2	1	0	-0.67	1	0	0.61	1	0	-0.16	1	0	-0.29	1	0	0.92	0.67	0.173925	0.64	0.9	0.0457575	0.7	0.82	0.0861861	0.54	0.93	0.0315171	0.19	1	0	0.33	1	0
FBgn0024251	bbx	-0.22	1	0	-0.17	1	0	-0.23	1	0	-0.00418	1	0	0.01	1	0	-0.03	1	0	0.03	1	0	0.06	1	0	-0.02	1	0	-0.09	0.98	0.00877392	-0.15	0.91	0.0409586	-0.16	0.85	0.0705811	-0.00438	1	0	-0.00579	1	0	-0.02	1	0
FBgn0040239	bc10	0.00256	1	0	0.05	1	0	0.06	1	0	-0.15	1	0	-0.06	1	0	0.06	1	0	-0.2	1	0	0.03	1	0	0.01	1	0	-0.28	0.51	0.29243	0.06	1	0	-0.18	0.81	0.091515	-0.02	1	0	-0.12	1	0	-0.11	1	0
FBgn0039558	BCAS2	-0.06	1	0	-0.01	1	0	-0.21	1	0	-0.08	1	0	-0.37	0.66	0.180456	0.09	1	0	-0.19	1	0	0.05	1	0	-0.04	1	0	-0.41	0.64	0.19382	-0.34	0.81	0.091515	-0.25	0.88	0.0555173	0.37	0.93	0.0315171	0.15	1	0	0.15	1	0
FBgn0000166	bcd	3.13	1	0	0.13	1	0	3.65	0.93	0.0315171	-0.3	1	0	-0.55	0.27	0.568636	0.12	1	0	-0.15	1	0	0.11	0.96	0.0177288	-0.1	1	0	-0.59	1	0	-2.91	0.58	0.236572	-1.44	0.81	0.091515	6.86	0.000153	3.81531	5.52	0.007	2.1549	-1.33	1	0
FBgn0043362	bchs	-0.24	1	0	-0.21	1	0	-0.12	1	0	0.11	1	0	0.3	0.67	0.173925	-0.2	1	0	0.14	1	0	-0.26	0.96	0.0177288	-0.27	1	0	-0.15	0.79	0.102373	-0.16	0.82	0.0861861	-0.25	0.4	0.39794	-0.2	0.73	0.136677	-0.09	1	0	-0.17	0.88	0.0555173
FBgn0026149	BCL7-like	-0.19	1	0	0.02	1	0	-0.07	1	0	-0.12	1	0	-0.24	0.78	0.107905	0.17	1	0	-0.06	1	0	0.2	0.95	0.0222764	0.05	1	0	-0.33	0.67	0.173925	-0.05	1	0	-0.14	0.96	0.0177288	0.6	0.69	0.161151	0.15	1	0	-0.18	1	0
FBgn0013432	bcn92	0.12	1	0	0.46	1	0	0.54	0.77	0.113509	0.2	1	0	-0.03	1	0	0.07	1	0	-0.04	1	0	0.04	1	0	-0.09	1	0	0.05	1	0	0.07	1	0	0.03	1	0	0.02	1	0	-0.07	1	0	-0.3	1	0
FBgn0038857	Bdbt	-0.1	1	0	-0.21	1	0	-0.25	1	0	-0.1	1	0	-0.25	0.84	0.0757207	0.07	1	0	0.08	1	0	0.2	0.96	0.0177288	0.2	1	0	-0.28	0.76	0.119186	0.11	1	0	-0.08	1	0	0.16	1	0	0.12	1	0	-0.05	1	0
FBgn0034049	bdg	0.1	1	0	0.01	1	0	0.18	1	0	-0.03	1	0	0.04	1	0	0.03	1	0	0.02	1	0	0.11	0.96	0.0177288	-0.03	1	0	0.1	0.94	0.0268721	-0.04	1	0	-0.03	1	0	0.18	0.9	0.0457575	0.1	1	0	0.16	1	0
FBgn0052594	be	-0.14	1	0	-0.07	1	0	-0.13	1	0	0.07	1	0	0.07	1	0	0.02	1	0	0.13	1	0	-0.02	1	0	-0.05	1	0	-0.15	0.84	0.0757207	-0.19	0.76	0.119186	0.00621	1	0	0.00181	1	0	-0.17	1	0	-0.13	1	0
FBgn0015602	BEAF-32	-0.00633	1	0	0.02	1	0	0.07	1	0	-0.25	1	0	-0.39	0.44	0.356547	0.06	1	0	-0.04	1	0	0.22	0.96	0.0177288	0.05	1	0	-0.04	1	0	-0.22	0.83	0.0809219	-0.13	0.94	0.0268721	0.3	0.83	0.0809219	-0.03	1	0	-0.04	1	0
FBgn0037660	beag	0.1	1	0	0.01	1	0	0.12	1	0	-0.17	1	0	-0.2	0.87	0.0604807	0.05	1	0	-0.00528	1	0	0.11	0.96	0.0177288	0.11	1	0	0.0015	1	0	0.08	1	0	-0.03	1	0	0.14	0.96	0.0177288	0.11	1	0	0.00938	1	0
FBgn0013433	beat-Ia	-0.06	1	0	0.09	1	0	0.27	1	0	0.09	1	0	0.19	0.99	0.00436481	-0.26	1	0	0.17	1	0	-0.19	1	0	0.2	1	0	-0.23	0.73	0.136677	-0.2	0.84	0.0757207	-0.25	0.67	0.173925	0.01	1	0	-0.05	1	0	0.00306	1	0
FBgn0028645	beat-Ib	-0.44	1	0	-0.99	1	0	-0.44	1	0	-0.25	1	0	-0.1	1	0	-0.61	1	0	-0.08	1	0	-0.58	0.96	0.0177288	-0.2	1	0	0.02	1	0	0.2	0.91	0.0409586	-0.04	1	0	0.18	0.98	0.00877392	0.01	1	0	0.08	1	0
FBgn0028644	beat-Ic	-0.38	1	0	0.04	1	0	-0.16	1	0	0.81	0.68	0.167491	0.9	0.25	0.60206	-0.02	1	0	0.23	1	0	-0.33	0.96	0.0177288	-0.36	1	0	0.1	1	0	-0.12	0.98	0.00877392	0.09	1	0	-0.02	1	0	-0.04	1	0	-0.04	1	0
FBgn0038498	beat-IIa	0.07	1	0	-0.15	1	0	-0.06	1	0	-0.11	1	0	0.11	1	0	-0.48	1	0	0.12	1	0	-0.15	1	0	-0.13	1	0	0.13	0.92	0.0362122	0.07	1	0	0.14	0.9	0.0457575	-0.02	1	0	-0.08	1	0	0.08	1	0
FBgn0038494	beat-IIb	0.42	1	0	-0.25	1	0	0.28	1	0	0.66	1	0	0.68	0.68	0.167491	0.00757	1	0	0.85	1	0	0.72	0.96	0.0177288	0.08	1	0	0.04	1	0	0.06	1	0	-0.42	0.5	0.30103	0.29	0.96	0.0177288	0.04	1	0	-0.08	1	0
FBgn0265607	beat-IIIa	0.11	1	0	-0.62	1	0	-0.08	1	0	0.37	1	0	0.33	0.9	0.0457575	-0.13	1	0	0.39	1	0	0.03	1	0	0.3	1	0	-0.29	0.77	0.113509	-0.19	0.96	0.0177288	-0.34	0.69	0.161151	0.12	1	0	-0.17	1	0	0.09	1	0
FBgn0053179	beat-IIIb	0.05	1	0	0.47	1	0	0.6	0.99	0.00436481	0.5	1	0	0.5	0.69	0.161151	-0.04	1	0	0.21	1	0	-0.39	0.96	0.0177288	-0.03	1	0	-0.32	0.36	0.443697	-0.08	1	0	-0.32	0.35	0.455932	-0.13	0.97	0.0132283	-0.2	0.99	0.00436481	-0.27	0.86	0.0655015
FBgn0032629	beat-IIIc	-0.37	1	0	-0.41	1	0	-0.26	1	0	0.09	1	0	0.38	0.7	0.154902	-0.32	1	0	0.14	1	0	-0.37	0.96	0.0177288	-0.15	1	0	-0.22	0.82	0.0861861	-0.03	1	0	-0.22	0.83	0.0809219	-0.21	0.92	0.0362122	-0.09	1	0	-0.18	1	0
FBgn0039089	beat-IV	-0.4	1	0	-0.45	1	0	-0.67	0.87	0.0604807	0.07	1	0	0.34	0.86	0.0655015	-0.24	1	0	-0.1	1	0	-0.21	1	0	-0.22	1	0	-0.1	0.99	0.00436481	0.02	1	0	-0.1	0.99	0.00436481	-0.15	1	0	-0.19	1	0	-0.13	1	0
FBgn0038087	beat-Va	-0.15	1	0	0.24	1	0	0.3	1	0	-0.15	1	0	0.11	1	0	-0.95	0.75	0.124939	0.32	1	0	0.08	1	0	-0.24	1	0	0.06	1	0	0.15	0.97	0.0132283	-0.27	0.83	0.0809219	-0.25	0.96	0.0177288	-0.17	1	0	-0.23	1	0
FBgn0038092	beat-Vb	0.05	1	0	0.06	1	0	0.78	0.81	0.091515	0.16	1	0	0.38	0.95	0.0222764	-0.43	1	0	0.03	1	0	-0.49	0.96	0.0177288	-0.07	1	0	0.41	0.64	0.19382	0.47	0.59	0.229148	0.45	0.54	0.267606	-0.000802	1	0	-0.08	1	0	0.19	1	0
FBgn0038084	beat-Vc	-0.24	1	0	-0.4	1	0	-0.39	1	0	0.16	1	0	0.51	0.9	0.0457575	-0.39	1	0	0.13	1	0	-1.31	0.86	0.0655015	-0.11	1	0	0.34	0.82	0.0861861	0.23	0.96	0.0177288	0.08	1	0	0.23	0.99	0.00436481	-0.27	1	0	-0.02	1	0
FBgn0039584	beat-VI	-0.15	1	0	-0.08	1	0	0.13	1	0	0.54	1	0	0.98	0.18	0.744727	0.14	1	0	0.33	1	0	-0.49	0.96	0.0177288	-0.06	1	0	0.16	0.94	0.0268721	0.08	1	0	-0.22	0.83	0.0809219	-0.08	1	0	-0.14	1	0	0.0061	1	0
FBgn0250908	beat-VII	-0.32	1	0	-0.08	1	0	-0.22	1	0	0.21	1	0	0.62	0.34	0.468521	0.19	1	0	-0.15	1	0	-0.08	1	0	-0.09	1	0	-0.04	1	0	0.09	1	0	-0.02	1	0	-0.22	0.93	0.0315171	-0.14	1	0	-0.06	1	0
FBgn0036691	beg	-0.16	1	0	-0.11	1	0	-0.28	1	0	-0.16	1	0	-0.32	0.74	0.130768	0.11	1	0	-0.05	1	0	0.16	0.96	0.0177288	0.07	1	0	0.18	0.96	0.0177288	0.41	0.69	0.161151	0.34	0.75	0.124939	0.14	1	0	-0.05	1	0	-0.24	1	0
FBgn0263231	bel	0.02	1	0	0.01	1	0	0.03	1	0	0.06	1	0	0.04	1	0	0.1	1	0	0.00234	1	0	0.00571	1	0	0.02	1	0	0.04	1	0	-0.03	1	0	0.13	0.93	0.0315171	0.07	1	0	0.05	1	0	0.05	1	0
FBgn0025109	Bem46	-0.19	1	0	-0.03	1	0	-0.24	1	0	-0.24	1	0	-0.35	0.6	0.221849	-0.07	1	0	-0.1	1	0	0.04	1	0	-0.03	1	0	0.16	0.83	0.0809219	-0.01	1	0	0.11	0.94	0.0268721	0.11	0.99	0.00436481	0.04	1	0	-0.04	1	0
FBgn0000173	ben	-0.02	1	0	0.02	1	0	-0.00945	1	0	0.02	1	0	-0.07	1	0	0.07	1	0	0.000672	1	0	0.09	0.96	0.0177288	-0.00597	1	0	-0.02	1	0	-0.03	1	0	-0.02	1	0	-0.02	1	0	-0.08	1	0	-0.12	1	0
FBgn0040238	Best1	-0.14	1	0	-0.22	1	0	-0.07	1	0	-0.08	1	0	-0.2	0.83	0.0809219	-0.02	1	0	0.04	1	0	0.06	1	0	0.0013	1	0	-0.09	0.96	0.0177288	-0.14	0.89	0.05061	-0.07	1	0	-0.09	1	0	-0.18	1	0	-0.19	1	0
FBgn0035696	Best2	-0.09	1	0	-0.03	1	0	-0.12	1	0	0.14	1	0	0.08	1	0	0.02	1	0	-0.02	1	0	-0.05	1	0	-0.13	1	0	-0.17	0.74	0.130768	-0.13	0.91	0.0409586	-0.09	0.95	0.0222764	-0.1	0.96	0.0177288	-0.11	1	0	-0.08	1	0
FBgn0036492	Best3	0.65	0.93	0.0315171	0.74	1	0	0.88	0.4	0.39794	1.8	1	0	0.91	0.9	0.0457575	1.22	1	0	1.2	1	0	-0.98	1	0	1.09	1	0	0.37	0.53	0.275724	0.3	0.76	0.119186	0.41	0.42	0.376751	-0.00659	1	0	0.00912	1	0	0.33	1	0
FBgn0036491	Best4	0.33	1	0	0.07	1	0	0.43	1	0	3.79	1	0	2.39	0.9	0.0457575	0.05	1	0	-0.07	1	0	2.18	0.96	0.0177288	2.48	1	0	0.05	1	0	0.11	1	0	-0.1	1	0	0.12	1	0	0.33	1	0	0.48	0.94	0.0268721
FBgn0260857	Bet1	0.09	1	0	-0.08	1	0	-0.13	1	0	0.08	1	0	-0.14	0.95	0.0222764	0.14	1	0	0.04	1	0	0.26	0.96	0.0177288	0.16	1	0	-0.06	1	0	0.1	0.97	0.0132283	-0.02	1	0	0.15	0.96	0.0177288	0.03	1	0	0.1	1	0
FBgn0260859	Bet3	0.00274	1	0	0.02	1	0	0.07	1	0	-0.16	1	0	-0.15	0.9	0.0457575	0.03	1	0	0.07	1	0	0.26	0.96	0.0177288	0.13	1	0	-0.12	0.96	0.0177288	-0.09	1	0	-0.06	1	0	0.2	0.93	0.0315171	0.14	1	0	0.04	1	0
FBgn0260860	Bet5	-0.21	1	0	-0.07	1	0	-0.07	1	0	0.23	1	0	0.18	0.9	0.0457575	0.12	1	0	0.15	1	0	0.09	1	0	-0.15	1	0	-0.27	0.82	0.0861861	0.06	1	0	-0.12	1	0	0.03	1	0	-0.22	1	0	-0.25	1	0
FBgn0033315	beta3GalTII	0.11	1	0	0.25	1	0	-0.12	1	0	-0.18	1	0	-0.22	0.86	0.0655015	0.19	1	0	0.13	1	0	0.33	0.95	0.0222764	0.36	1	0	-0.04	1	0	-0.03	1	0	-0.04	1	0	0.46	0.84	0.0757207	0.07	1	0	0.01	1	0
FBgn0027538	beta4GalNAcTA	-0.34	1	0	-0.37	1	0	-0.49	0.67	0.173925	0.03	1	0	-0.23	0.81	0.091515	-0.06	1	0	0.13	1	0	0.2	0.96	0.0177288	-0.02	1	0	0.19	0.76	0.119186	0.11	0.97	0.0132283	0.16	0.85	0.0705811	0.15	0.96	0.0177288	0.07	1	0	-0.07	1	0
FBgn0039625	beta4GalNAcTB	-0.33	1	0	-0.15	1	0	-0.38	0.98	0.00877392	0.05	1	0	-0.08	1	0	0.31	1	0	-0.00812	1	0	0.15	0.96	0.0177288	0.19	1	0	-0.24	0.86	0.0655015	-0.17	0.97	0.0132283	-0.19	0.94	0.0268721	0.24	0.96	0.0177288	0.02	1	0	0.00656	1	0
FBgn0039258	beta4GalT7	0.02	1	0	0.02	1	0	0.12	1	0	-0.34	1	0	-0.46	0.55	0.259637	0.05	1	0	-0.12	1	0	0.17	0.96	0.0177288	0.03	1	0	-0.13	0.99	0.00436481	-0.04	1	0	0.12	0.99	0.00436481	0.28	0.95	0.0222764	0.05	1	0	0.03	1	0
FBgn0008635	betaCOP	-0.05	1	0	-0.07	1	0	-0.17	1	0	0.06	1	0	0.05	1	0	0.12	1	0	0.04	1	0	0.05	1	0	0.11	1	0	-0.13	0.92	0.0362122	-0.08	1	0	-0.07	1	0	-0.04	1	0	-0.1	1	0	-0.11	1	0
FBgn0025724	beta'COP	-0.02	1	0	-0.11	1	0	-0.19	1	0	0.11	1	0	0.03	1	0	0.11	1	0	0.1	1	0	0.09	0.96	0.0177288	0.1	1	0	-0.03	1	0	-0.09	0.97	0.0132283	-0.06	1	0	-0.06	1	0	-0.11	1	0	-0.11	1	0
FBgn0015000	betaggt-I	0.00796	1	0	-0.1	1	0	-0.09	1	0	-0.16	1	0	-0.36	0.48	0.318759	-0.1	1	0	-0.07	1	0	0.16	0.96	0.0177288	0.05	1	0	-0.07	1	0	-0.12	0.93	0.0315171	-0.07	0.99	0.00436481	-0.17	0.93	0.0315171	-0.19	0.98	0.00877392	-0.19	1	0
FBgn0028970	betaggt-II	0.08	1	0	-0.08	1	0	-0.11	1	0	0.29	1	0	0.41	0.62	0.207608	0.23	1	0	0.1	1	0	0.06	1	0	-0.07	1	0	-0.25	0.76	0.119186	-0.28	0.77	0.113509	-0.09	1	0	-0.21	0.96	0.0177288	-0.07	1	0	-0.06	1	0
FBgn0030538	betaNACtes1	0.55	1	0	0.78	1	0	0.41	1	0	2.41	1	0	0.13	1	0	0.05	1	0	#N/A	#N/A	#N/A	#N/A	#N/A	#N/A	#N/A	#N/A	#N/A	0.62	0.69	0.161151	0.48	0.87	0.0604807	0.51	0.8	0.09691	-0.09	1	0	0.01	1	0	0.18	1	0
FBgn0030563	betaNACtes2	-0.05	1	0	0.58	1	0	0.27	1	0	-2.38	1	0	-2.27	0.9	0.0457575	0.74	1	0	-0.03	1	0	-0.99	0.99	0.00436481	-0.69	1	0	0.97	0.22	0.657577	0.58	0.74	0.130768	0.85	0.35	0.455932	-0.33	0.96	0.0177288	-0.07	1	0	-0.06	1	0
FBgn0052601	betaNACtes3	0.64	1	0	1	1	0	0.69	0.94	0.0268721	-2.38	1	0	2.7	0.57	0.244125	0.74	1	0	2.04	1	0	1.22	0.96	0.0177288	0.16	1	0	0.64	0.56	0.251812	0.45	0.84	0.0757207	0.31	0.93	0.0315171	0.2	1	0	-0.1	1	0	-0.02	1	0
FBgn0030566	betaNACtes4	-0.4	1	0	0.18	1	0	-0.06	1	0	-2.55	1	0	-0.52	1	0	-2.65	1	0	-1.41	1	0	0.19	1	0	-1.21	1	0	0.4	0.77	0.113509	0.4	0.82	0.0861861	-0.09	1	0	-0.04	1	0	0.19	1	0	0.24	1	0
FBgn0262163	betaNACtes5	0.83	1	0	0.71	1	0	1.5	0.71	0.148742	0.03	1	0	2.39	0.9	0.0457575	3.67	1	0	2.28	1	0	2.18	0.96	0.0177288	0.08	1	0	0.87	0.82	0.0861861	-0.51	0.99	0.00436481	0.66	0.92	0.0362122	-0.19	1	0	-1.14	0.63	0.200659	-0.59	1	0
FBgn0052598	betaNACtes6	0.73	1	0	0.21	1	0	0.32	1	0	2.41	1	0	0.13	1	0	3.15	1	0	-2.39	1	0	-0.14	1	0	-2.24	1	0	0.86	0.17	0.769551	0.05	1	0	0.56	0.57	0.244125	-0.41	0.94	0.0268721	0.21	1	0	0.41	1	0
FBgn0250788	beta-Spec	-0.3	1	0	-0.24	1	0	-0.42	0.89	0.05061	0.09	1	0	0.31	0.71	0.148742	-0.16	1	0	0.07	1	0	-0.27	0.96	0.0177288	-0.13	1	0	-0.11	0.96	0.0177288	-0.1	0.99	0.00436481	-0.23	0.73	0.136677	-0.1	0.96	0.0177288	0.04	1	0	-0.05	1	0
FBgn0010357	betaTry	-0.78	0.66	0.180456	-0.6	1	0	-1.61	0.01	2	0.25	1	0	0.32	0.75	0.124939	0.05	1	0	0.12	1	0	-0.35	0.96	0.0177288	-0.06	1	0	0.11	1	0	-0.17	0.96	0.0177288	-0.18	0.9	0.0457575	0.17	0.81	0.091515	0.18	0.85	0.0705811	-0.03	1	0
FBgn0003887	betaTub56D	-0.01	1	0	-0.1	1	0	-0.24	1	0	-0.23	1	0	-0.18	0.9	0.0457575	0.13	1	0	-0.1	1	0	0.05	1	0	0.01	1	0	-0.18	0.87	0.0604807	-0.14	0.96	0.0177288	-0.3	0.55	0.259637	0.09	0.96	0.0177288	0.00886	1	0	-0.02	1	0
FBgn0003888	betaTub60D	-0.07	1	0	-0.4	1	0	-0.03	1	0	0.19	1	0	0.2	0.86	0.0655015	0.1	1	0	0.05	1	0	-0.33	0.96	0.0177288	-0.16	1	0	0.09	1	0	-0.17	0.92	0.0362122	-0.12	0.96	0.0177288	-0.34	0.5	0.30103	0.08	1	0	0.00923	1	0
FBgn0003889	betaTub85D	0.94	0.26	0.585027	0.69	1	0	1.07	0.07	1.1549	0.78	1	0	0.4	0.99	0.00436481	0.85	1	0	0.9	1	0	0.92	0.96	0.0177288	0.16	1	0	0.31	0.54	0.267606	0.23	0.82	0.0861861	0.42	0.26	0.585027	0.21	0.67	0.173925	0.33	0.21	0.677781	0.41	0.04	1.39794
FBgn0003890	betaTub97EF	-1.32	0.1	1	-1.19	0.24	0.619789	-1.21	0.09	1.04576	-0.00142	1	0	0.38	0.49	0.309804	-0.42	0.94	0.0268721	-0.18	1	0	-0.51	0.69	0.161151	-0.16	1	0	-0.08	1	0	-0.15	0.95	0.0222764	-0.1	0.99	0.00436481	-0.33	0.35	0.455932	-0.17	0.95	0.0222764	-0.06	1	0
FBgn0083938	BG642163	-0.03	1	0	0.13	1	0	2.27	1	0	0.03	1	0	2.39	0.9	0.0457575	0.05	1	0	3.14	1	0	-0.04	1	0	0.08	1	0	0.76	0.00383	2.4168	0.07	1	0	0.43	0.28	0.552842	-0.39	0.59	0.229148	-0.56	0.23	0.638272	-0.28	0.89	0.05061
FBgn0250831	BG642167	-0.1	1	0	0.85	1	0	-2.45	1	0	-1.22	1	0	-1.25	0.86	0.0655015	-2.18	1	0	-0.04	1	0	-0.14	1	0	0.16	1	0	-0.05	1	0	-0.08	1	0	0.04	1	0	-0.36	0.75	0.124939	-0.19	1	0	-0.03	1	0
FBgn0047334	BG642312	-0.18	1	0	-0.16	1	0	-0.67	1	0	0.96	1	0	-0.25	1	0	0.31	1	0	-0.43	1	0	-1.01	0.96	0.0177288	0.24	1	0	0.05	1	0	-0.2	0.85	0.0705811	-0.03	1	0	-0.31	0.57	0.244125	-0.02	1	0	0.07	1	0
FBgn0013753	Bgb	0.04	1	0	-0.05	1	0	0.13	1	0	-0.32	1	0	-0.52	0.34	0.468521	0.12	1	0	-0.02	1	0	0.17	0.96	0.0177288	0.18	1	0	0.3	0.56	0.251812	0.04	1	0	0.29	0.56	0.251812	0.31	0.9	0.0457575	-0.1	1	0	-0.03	1	0
FBgn0004581	bgcn	0.48	1	0	0.38	1	0	0.64	0.78	0.107905	0.2	1	0	0.01	1	0	0.2	1	0	-0.03	1	0	0.04	1	0	-0.23	1	0	0.47	0.14	0.853872	0.28	0.68	0.167491	0.62	0.02	1.69897	0.17	0.96	0.0177288	0.31	0.76	0.119186	0.36	0.58	0.236572
FBgn0027348	bgm	-2.18	0.00045	3.34679	-2.62	4.73e-06	5.32514	-2.41	2.21e-05	4.65561	-0.21	1	0	-0.1	0.95	0.0222764	-0.14	1	0	-0.16	1	0	-0.12	0.96	0.0177288	-0.13	1	0	-0.53	0.00301	2.52143	-0.16	0.82	0.0861861	-0.5	0.00706	2.1512	-0.62	0.07	1.1549	-0.7	0.03	1.52288	-0.92	0.00081	3.09151
FBgn0011758	B-H1	-0.41	1	0	-0.1	1	0	-0.19	1	0	0.58	1	0	0.85	0.71	0.148742	0.17	1	0	-0.57	1	0	-0.71	0.96	0.0177288	-0.11	1	0	-0.45	0.73	0.136677	0.11	1	0	-0.15	1	0	-0.16	1	0	-0.04	1	0	-0.15	1	0
FBgn0004854	B-H2	0.02	1	0	0.17	1	0	0.16	1	0	0.13	1	0	0.34	0.94	0.0268721	-0.17	1	0	0.08	1	0	-0.44	0.96	0.0177288	-0.27	1	0	0.14	1	0	0.32	0.87	0.0604807	0.31	0.85	0.0705811	0.28	0.96	0.0177288	0.09	1	0	-0.19	1	0
FBgn0261111	BHD	0.14	1	0	-0.1	1	0	0.00974	1	0	-0.29	1	0	-0.12	1	0	0.24	1	0	0.09	1	0	0.32	0.96	0.0177288	0.16	1	0	0.21	0.89	0.05061	-0.02	1	0	0.35	0.59	0.229148	0.07	1	0	0.13	1	0	0.13	1	0
FBgn0000179	bi	-0.11	1	0	-0.15	1	0	-0.2	1	0	0.28	1	0	0.85	0.44	0.356547	0.05	1	0	-0.05	1	0	-0.02	1	0	-0.01	1	0	-0.19	0.94	0.0268721	0.05	1	0	-0.19	0.92	0.0362122	-0.2	0.98	0.00877392	-0.0085	1	0	-0.09	1	0
FBgn0035871	BI-1	0.31	1	0	0.3	1	0	0.24	1	0	0.25	1	0	0.24	0.73	0.136677	0.09	1	0	0.03	1	0	0.16	0.96	0.0177288	-0.04	1	0	0.12	0.91	0.0409586	0.04	1	0	0.14	0.81	0.091515	0.04	1	0	0.09	1	0	0.13	1	0
FBgn0000180	bib	-0.2	1	0	-0.22	1	0	-0.08	1	0	0.55	1	0	1.41	0.08	1.09691	0.35	1	0	-0.29	1	0	-1.26	0.65	0.187087	-0.29	1	0	-0.39	0.78	0.107905	-0.46	0.74	0.130768	-0.6	0.47	0.327902	0.11	1	0	0.23	1	0	-0.22	1	0
FBgn0000181	bic	-0.02	1	0	0.09	1	0	-0.00707	1	0	0.00872	1	0	-0.00315	1	0	0.11	1	0	-0.04	1	0	0.05	1	0	0.02	1	0	0.15	0.9	0.0457575	0.15	0.92	0.0362122	0.11	0.94	0.0268721	0.18	0.81	0.091515	0.07	1	0	0.00307	1	0
FBgn0000182	BicC	0.62	0.91	0.0409586	0.83	1	0	0.8	0.44	0.356547	-0.19	1	0	-0.41	0.58	0.236572	0.12	1	0	-0.12	1	0	0.04	1	0	-0.04	1	0	0.16	0.79	0.102373	0.09	0.97	0.0132283	0.26	0.41	0.387216	0.85	0.0047	2.3279	0.41	0.58	0.236572	0.21	1	0
FBgn0000183	BicD	-0.08	1	0	-0.12	1	0	-0.23	1	0	0.02	1	0	-0.06	1	0	0.23	1	0	-0.04	1	0	-0.01	1	0	-0.1	1	0	-0.03	1	0	0.02	1	0	-0.21	0.61	0.21467	-0.06	1	0	-0.00996	1	0	-0.12	1	0
FBgn0014133	bif	-0.19	1	0	-0.27	1	0	-0.12	1	0	-0.19	1	0	-0.34	0.68	0.167491	0.09	1	0	-0.02	1	0	0.06	1	0	-0.02	1	0	0.18	0.71	0.148742	0.02	1	0	-0.02	1	0	0.5	0.16	0.79588	0.12	1	0	-0.12	1	0
FBgn0038252	BigH1	0.53	1	0	0.7	1	0	0.71	0.7	0.154902	-0.14	1	0	-0.43	0.36	0.443697	0.1	1	0	-0.07	1	0	0.17	0.96	0.0177288	0.07	1	0	0.4	0.43	0.366532	0.43	0.41	0.387216	0.18	0.9	0.0457575	1.76	0.0045	2.34679	0.74	0.71	0.148742	0.21	1	0
FBgn0039509	bigmax	0.09	1	0	0.38	1	0	0.05	1	0	0.04	1	0	0.15	0.9	0.0457575	-0.01	1	0	0.15	1	0	0.09	1	0	0.03	1	0	-0.01	1	0	0.08	1	0	-0.28	0.46	0.337242	0.04	1	0	-0.01	1	0	0.00264	1	0
FBgn0039282	Bili	-0.13	1	0	-0.18	1	0	-0.15	1	0	0.18	1	0	0.06	1	0	-0.51	1	0	0.22	1	0	-0.33	0.96	0.0177288	0.06	1	0	-0.2	0.74	0.130768	0.01	1	0	-0.16	0.84	0.0757207	-0.01	1	0	-0.00821	1	0	-0.18	1	0
FBgn0045759	bin	-0.37	1	0	-0.24	1	0	-0.25	1	0	0.92	1	0	0.54	0.91	0.0409586	0.51	1	0	0.86	1	0	-0.27	1	0	1.11	1	0	-0.29	0.97	0.0132283	-0.06	1	0	0.2	1	0	-0.11	1	0	-0.24	1	0	-0.13	1	0
FBgn0024491	Bin1	-0.02	1	0	0.06	1	0	0.11	1	0	-0.13	1	0	-0.21	0.87	0.0604807	0.19	1	0	0.17	1	0	0.35	0.77	0.113509	0.27	1	0	-0.43	0.48	0.318759	-0.27	0.84	0.0757207	-0.21	0.88	0.0555173	0.5	0.81	0.091515	-0.15	1	0	-0.15	1	0
FBgn0263144	bin3	-0.15	1	0	-0.15	1	0	-0.1	1	0	-0.08	1	0	-0.18	0.84	0.0757207	0.13	1	0	-0.02	1	0	0.08	1	0	-0.0011	1	0	-0.21	0.62	0.207608	-0.01	1	0	-0.2	0.61	0.21467	0.32	0.63	0.200659	0.12	1	0	-0.09	1	0
FBgn0026263	bip1	0.06	1	0	0.15	1	0	0.31	0.99	0.00436481	0.03	1	0	-0.45	0.49	0.309804	0.22	1	0	-0.07	1	0	0.12	0.96	0.0177288	0.02	1	0	0.26	0.81	0.091515	0.12	1	0	0.11	1	0	0.67	0.46	0.337242	0.07	1	0	0.26	1	0
FBgn0026262	bip2	-0.13	1	0	0.0012	1	0	-0.07	1	0	0.1	1	0	0.00217	1	0	0.19	1	0	0.05	1	0	0.09	0.99	0.00436481	-0.00901	1	0	-0.04	1	0	0.11	0.96	0.0177288	-0.07	0.97	0.0132283	0.08	0.97	0.0132283	-0.13	1	0	-0.1	1	0
FBgn0010520	Bka	-0.25	1	0	-0.13	1	0	-0.07	1	0	0.17	1	0	0.05	1	0	0.14	1	0	0.00528	1	0	0.18	0.96	0.0177288	0.09	1	0	-0.13	1	0	0.37	0.74	0.130768	0.11	1	0	0.7	0.55	0.259637	0.15	1	0	0.09	1	0
FBgn0267791	bl	0.05	1	0	-0.05	1	0	-0.07	1	0	0.12	1	0	0.16	0.89	0.05061	0.12	1	0	-0.05	1	0	-0.03	1	0	0.02	1	0	0.12	0.91	0.0409586	0.04	1	0	0.08	0.97	0.0132283	0.04	1	0	-0.03	1	0	-0.07	1	0
FBgn0035608	blanks	0.23	1	0	0.61	1	0	0.43	0.99	0.00436481	1.47	1	0	1.15	0.76	0.119186	-0.38	1	0	-0.48	1	0	1.02	0.96	0.0177288	-1.62	1	0	0.44	0.29	0.537602	0.39	0.5	0.30103	0.29	0.66	0.180456	0.14	0.96	0.0177288	0.05	1	0	0.2	0.97	0.0132283
FBgn0035625	Blimp-1	0.07	1	0	0.11	1	0	0.52	0.74	0.130768	0.14	1	0	0.39	0.56	0.251812	-0.17	1	0	-0.0062	1	0	-0.28	0.96	0.0177288	-0.22	1	0	0.12	0.89	0.05061	-0.01	1	0	-0.11	0.93	0.0315171	-0.24	0.56	0.251812	-0.39	0.08	1.09691	-0.61	0.000292	3.53462
FBgn0002906	Blm	0.00368	1	0	-0.00517	1	0	0.02	1	0	-0.22	1	0	-0.49	0.36	0.443697	0.09	1	0	-0.03	1	0	0.09	1	0	-0.03	1	0	0.25	0.76	0.119186	0.31	0.68	0.167491	0.11	0.98	0.00877392	0.74	0.08	1.09691	0.36	0.84	0.0757207	0.19	1	0
FBgn0050077	Blos1	-0.04	1	0	0.05	1	0	0.09	1	0	0.03	1	0	-0.1	1	0	-0.02	1	0	-0.04	1	0	-0.01	1	0	-0.03	1	0	0.09	1	0	0.05	1	0	-0.04	1	0	-0.33	0.91	0.0409586	-0.12	1	0	-0.07	1	0
FBgn0036118	Blos2	-0.03	1	0	0.04	1	0	0.08	1	0	0.1	1	0	-0.17	0.93	0.0315171	0.08	1	0	-0.07	1	0	0.1	1	0	-0.000247	1	0	-0.05	1	0	0.07	1	0	-0.06	1	0	-0.12	1	0	-0.35	1	0	-0.02	1	0
FBgn0085284	Blos3	0.22	1	0	0.19	1	0	-0.07	1	0	-0.05	1	0	-0.11	1	0	0.1	1	0	-0.06	1	0	0.17	0.99	0.00436481	0.02	1	0	-0.15	1	0	0.05	1	0	-0.17	0.97	0.0132283	0.14	1	0	0.12	1	0	-0.01	1	0
FBgn0036105	Blos4	0.15	1	0	0.4	1	0	0.00824	1	0	0.06	1	0	-0.18	0.9	0.0457575	0.21	1	0	0.02	1	0	0.38	0.89	0.05061	0.13	1	0	0.08	1	0	-0.09	1	0	0.2	0.9	0.0457575	0.08	1	0	-0.03	1	0	-0.02	1	0
FBgn0027660	blot	-0.35	0.99	0.00436481	-0.25	1	0	-0.37	0.75	0.124939	-0.18	1	0	-0.3	0.64	0.19382	0.12	1	0	0.27	1	0	0.16	0.96	0.0177288	0.1	1	0	-0.07	0.99	0.00436481	-0.15	0.87	0.0604807	-0.11	0.93	0.0315171	0.11	1	0	-0.07	1	0	-0.08	1	0
FBgn0004133	blow	-0.1	1	0	-0.25	1	0	-0.09	1	0	0.06	1	0	0.03	1	0	-0.15	1	0	-0.15	1	0	-0.37	0.96	0.0177288	-0.00463	1	0	-0.06	1	0	-0.22	0.83	0.0809219	-0.02	1	0	-0.41	0.4	0.39794	-0.33	0.69	0.161151	-0.23	0.94	0.0268721
FBgn0038387	blp	-0.3	1	0	0.02	1	0	-0.12	1	0	-0.02	1	0	-0.07	1	0	0.02	1	0	-0.00329	1	0	0.16	0.96	0.0177288	-0.06	1	0	-0.01	1	0	0.08	1	0	-0.23	0.74	0.130768	-0.07	1	0	0.02	1	0	-0.00398	1	0
FBgn0041161	blue	-0.02	1	0	0.02	1	0	-0.11	1	0	0.04	1	0	0.14	0.9	0.0457575	0.2	1	0	0.08	1	0	-0.1	1	0	-0.17	1	0	0.19	0.68	0.167491	0.1	0.96	0.0177288	0.12	0.9	0.0457575	0.05	1	0	0.06	1	0	0.14	1	0
FBgn0011211	blw	-0.43	1	0	-0.25	1	0	-0.73	0.44	0.356547	0.02	1	0	0.44	0.6	0.221849	-0.27	1	0	0.03	1	0	-0.33	0.96	0.0177288	-0.18	1	0	0.07	1	0	-0.02	1	0	-0.37	0.42	0.376751	-0.2	0.9	0.0457575	0.33	0.57	0.244125	0.24	0.83	0.0809219
FBgn0026562	BM-40-SPARC	-0.47	0.88	0.0555173	-0.54	1	0	-0.7	0.28	0.552842	0.07	1	0	0.49	0.29	0.537602	-0.11	1	0	-0.15	1	0	-0.37	0.86	0.0655015	0.00179	1	0	-0.23	0.71	0.148742	-0.03	1	0	-0.17	0.85	0.0705811	-0.39	0.07	1.1549	-0.25	0.54	0.267606	-0.14	1	0
FBgn0036199	Bmcp	-0.22	1	0	0.05	1	0	-0.05	1	0	0.15	1	0	-0.13	0.94	0.0268721	0.02	1	0	0.09	1	0	0.21	0.96	0.0177288	0.00993	1	0	-0.02	1	0	-0.37	0.29	0.537602	-0.05	1	0	-0.23	0.91	0.0409586	-0.59	0.14	0.853872	-0.64	0.07	1.1549
FBgn0036449	bmm	-0.18	1	0	-0.46	1	0	-0.59	0.4	0.39794	0.04	1	0	0.00447	1	0	-0.09	1	0	-0.23	1	0	0.06	1	0	-0.12	1	0	-0.02	1	0	-0.05	1	0	-0.11	0.95	0.0222764	-0.13	0.99	0.00436481	-0.41	0.63	0.200659	-0.34	0.79	0.102373
FBgn0001090	bnb	-0.2	1	0	-0.04	1	0	0.00532	1	0	0.07	1	0	0.56	0.53	0.275724	0.06	1	0	-0.21	1	0	-0.56	0.94	0.0268721	-0.38	1	0	-0.05	1	0	-0.03	1	0	-0.11	0.95	0.0222764	-0.08	1	0	0.13	1	0	0.08	1	0
FBgn0004389	bnk	#N/A	#N/A	#N/A	#N/A	#N/A	#N/A	#N/A	#N/A	#N/A	0.28	1	0	0.95	0.9	0.0457575	0.67	1	0	0.5	1	0	0.37	1	0	0.17	1	0	-2.47	0.94	0.0268721	0.66	1	0	-2.41	0.94	0.0268721	3.11	0.92	0.0362122	2.45	1	0	-0.00902	1	0
FBgn0014135	bnl	0.06	1	0	-0.23	1	0	-0.19	1	0	0.43	1	0	0.76	0.21	0.677781	0.00983	1	0	0.31	1	0	-0.5	0.96	0.0177288	-0.17	1	0	0.05	1	0	0.14	0.92	0.0362122	0.2	0.72	0.142668	-0.18	0.96	0.0177288	-0.38	0.65	0.187087	-0.3	0.84	0.0757207
FBgn0040487	BobA	2.07	1	0	5.72e-05	1	0	1.25	1	0	1.28	0.66	0.180456	2.13	0.01	2	1.54	0.3	0.522879	0.01	1	0	-1.04	0.96	0.0177288	-0.42	1	0	#N/A	#N/A	#N/A	#N/A	#N/A	#N/A	#N/A	#N/A	#N/A	-0.03	1	0	3.31	0.98	0.00877392	-0.00902	1	0
FBgn0004132	boca	0.23	1	0	-0.002	1	0	-0.00833	1	0	0.09	1	0	-0.04	1	0	0.2	1	0	-0.00736	1	0	0.26	0.96	0.0177288	0.19	1	0	0.15	0.96	0.0177288	0.18	0.92	0.0362122	0.04	1	0	0.19	0.96	0.0177288	0.06	1	0	-0.06	1	0
FBgn0037719	bocksbeutel	0.1	1	0	0.1	1	0	-0.05	1	0	-0.16	1	0	-0.31	0.69	0.161151	0.16	1	0	0.02	1	0	0.16	0.96	0.0177288	0.09	1	0	-0.1	0.96	0.0177288	-0.00955	1	0	-0.03	1	0	0.05	1	0	-0.14	1	0	-0.14	1	0
FBgn0040388	boi	-0.17	1	0	-0.08	1	0	-0.11	1	0	-0.15	1	0	-0.35	0.57	0.244125	0.18	1	0	-0.01	1	0	0.14	0.96	0.0177288	0.07	1	0	-0.22	0.87	0.0604807	-0.01	1	0	-0.12	0.99	0.00436481	0.56	0.76	0.119186	0.3	1	0	-0.07	1	0
FBgn0011206	bol	0.65	0.64	0.19382	0.42	1	0	0.77	0.31	0.508638	0.17	1	0	0.54	0.32	0.49485	-0.21	1	0	0.1	1	0	-0.21	0.96	0.0177288	-0.28	1	0	0.29	0.28	0.552842	0.31	0.26	0.585027	0.24	0.44	0.356547	0.2	0.89	0.05061	0.24	0.84	0.0757207	0.23	0.84	0.0757207
FBgn0050362	boly	0.89	0.5	0.30103	0.73	1	0	0.98	0.26	0.585027	-2.38	1	0	-0.00778	1	0	-2.35	1	0	-0.07	1	0	2.18	0.96	0.0177288	0.08	1	0	0.32	0.24	0.619789	0.3	0.37	0.431798	0.35	0.18	0.744727	0.1	1	0	0.26	0.95	0.0222764	0.35	0.73	0.136677
FBgn0023097	bon	-0.15	1	0	-0.08	1	0	-0.02	1	0	-0.06	1	0	-0.17	0.84	0.0757207	0.1	1	0	0.02	1	0	0.1	0.96	0.0177288	0.03	1	0	0.11	0.93	0.0315171	0.09	0.97	0.0132283	0.12	0.9	0.0457575	0.27	0.42	0.376751	0.08	1	0	-0.11	1	0
FBgn0260942	bond	0.34	1	0	0.07	1	0	0.23	1	0	0.47	0.42	0.376751	0.47	0.26	0.585027	0.22	1	0	-0.01	1	0	-0.37	0.96	0.0177288	-0.000534	1	0	-0.15	0.78	0.107905	-0.23	0.58	0.236572	-0.1	0.94	0.0268721	-0.26	0.48	0.318759	-0.21	0.71	0.148742	-0.19	0.8	0.09691
FBgn0026261	bonsai	-0.39	1	0	-0.44	1	0	-0.43	0.89	0.05061	0.05	1	0	-0.07	1	0	0.11	1	0	-0.01	1	0	0.03	1	0	-0.04	1	0	-0.3	0.43	0.366532	-0.01	1	0	-0.31	0.37	0.431798	0.26	0.87	0.0604807	0.04	1	0	0.05	1	0
FBgn0040237	bor	0.03	1	0	-0.06	1	0	0.12	1	0	0.1	1	0	-0.0083	1	0	0.12	1	0	-0.01	1	0	0.07	1	0	0.1	1	0	0.12	0.91	0.0409586	0.12	0.92	0.0362122	0.23	0.51	0.29243	0.15	0.89	0.05061	0.19	0.8	0.09691	0.25	0.48	0.318759
FBgn0259791	bora	0.55	1	0	0.49	1	0	0.51	0.9	0.0457575	-0.63	0.89	0.05061	-0.98	0.09	1.04576	0.04	1	0	-0.15	1	0	0.12	0.98	0.00877392	-0.01	1	0	0.25	0.83	0.0809219	-0.1	1	0	0.14	0.96	0.0177288	0.7	0.38	0.420216	0.39	0.94	0.0268721	0.08	1	0
FBgn0032105	borr	0.07	1	0	0.14	1	0	0.00277	1	0	-0.47	0.83	0.0809219	-0.63	0.16	0.79588	0.07	1	0	-0.12	1	0	0.07	1	0	-0.07	1	0	0.34	0.76	0.119186	-0.11	1	0	0.33	0.77	0.113509	1.24	0.1	1	0.52	0.94	0.0268721	0.2	1	0
FBgn0000206	boss	0.85	1	0	0.8	1	0	0.84	1	0	-0.21	1	0	-0.00477	1	0	-0.37	1	0	-0.12	1	0	-0.59	0.96	0.0177288	-0.59	1	0	-0.24	0.55	0.259637	-0.32	0.33	0.481486	-0.45	0.04	1.39794	-0.36	0.62	0.207608	-0.3	0.81	0.091515	-0.29	0.82	0.0861861
FBgn0027535	botv	-0.21	1	0	-0.08	1	0	-0.21	1	0	0.02	1	0	-0.15	0.9	0.0457575	0.07	1	0	-0.04	1	0	0.08	1	0	0.05	1	0	-0.28	0.43	0.366532	-0.23	0.66	0.180456	-0.16	0.83	0.0809219	-0.07	1	0	-0.23	0.97	0.0132283	-0.13	1	0
FBgn0261284	bou	0.000503	1	0	-0.14	1	0	-0.16	1	0	0.14	1	0	0.24	0.86	0.0655015	0.06	1	0	-0.12	1	0	-0.15	1	0	0.11	1	0	-0.27	0.74	0.130768	-0.14	0.97	0.0132283	-0.22	0.85	0.0705811	-0.23	0.96	0.0177288	-0.4	0.89	0.05061	-0.4	0.88	0.0555173
FBgn0004893	bowl	-0.17	1	0	-0.14	1	0	-0.14	1	0	0.24	1	0	0.45	0.47	0.327902	-0.18	1	0	0.06	1	0	-0.39	0.96	0.0177288	-0.13	1	0	0.01	1	0	-0.05	1	0	-0.01	1	0	-0.2	0.92	0.0362122	-0.16	1	0	-0.22	0.99	0.00436481
FBgn0037205	BoYb	0.91	1	0	0.64	1	0	0.73	1	0	0.25	1	0	0.04	1	0	0.3	1	0	0.38	1	0	0.39	0.46	0.337242	0.22	1	0	-0.73	0.59	0.229148	-0.56	0.81	0.091515	-0.13	1	0	2.48	0.00713	2.14691	1.03	0.77	0.113509	0.18	1	0
FBgn0000210	br	-0.01	1	0	0.19	1	0	0.13	1	0	0.13	1	0	0.27	0.83	0.0809219	0.08	1	0	-0.32	1	0	-0.57	0.96	0.0177288	-0.23	1	0	0.3	0.77	0.113509	0.09	1	0	-0.24	0.87	0.0604807	-0.02	1	0	-0.09	1	0	-0.17	1	0
FBgn0033155	Br140	-0.03	1	0	-0.00401	1	0	-0.07	1	0	-0.21	1	0	-0.31	0.63	0.200659	0.14	1	0	-0.05	1	0	0.06	1	0	-0.02	1	0	0.02	1	0	-0.04	1	0	0.02	1	0	0.26	0.89	0.05061	0.04	1	0	-0.03	1	0
FBgn0010300	brat	0.00211	1	0	0.04	1	0	0.24	1	0	-0.17	1	0	-0.26	0.73	0.136677	0.19	1	0	-0.08	1	0	0.06	1	0	-0.03	1	0	0.23	0.55	0.259637	0.26	0.51	0.29243	0.02	1	0	0.68	0.04	1.39794	0.33	0.79	0.102373	-0.03	1	0
FBgn0050169	Brca2	0.02	1	0	0.09	1	0	0.12	1	0	-0.29	1	0	-0.45	0.4	0.39794	0.00681	1	0	-0.03	1	0	0.13	0.96	0.0177288	0.07	1	0	0.29	0.49	0.309804	0.38	0.27	0.568636	0.54	0.02	1.69897	0.31	0.79	0.102373	-0.03	1	0	-0.000154	1	0
FBgn0000216	Brd	0.53	1	0	0.36	1	0	0.84	0.71	0.148742	3.26	0.09	1.04576	4.23	0.00417	2.37986	3.6	0.04	1.39794	0.17	1	0	-0.64	1	0	0.13	1	0	#N/A	#N/A	#N/A	#N/A	#N/A	#N/A	#N/A	#N/A	#N/A	#N/A	#N/A	#N/A	#N/A	#N/A	#N/A	#N/A	#N/A	#N/A
FBgn0039654	Brd8	-0.04	1	0	-0.00216	1	0	-0.08	1	0	-0.01	1	0	-0.1	1	0	0.14	1	0	0.08	1	0	0.06	1	0	0.02	1	0	0.02	1	0	0.04	1	0	0.05	1	0	0.24	0.96	0.0177288	0.13	1	0	0.06	1	0
FBgn0086694	Bre1	-0.23	1	0	-0.1	1	0	-0.14	1	0	-0.15	1	0	-0.28	0.68	0.167491	0.05	1	0	-0.02	1	0	0.03	1	0	-0.02	1	0	0.02	1	0	0.08	1	0	-0.00105	1	0	0.33	0.73	0.136677	0.07	1	0	-0.04	1	0
FBgn0038499	Brf	0.000178	1	0	-0.04	1	0	-0.16	1	0	-0.22	1	0	-0.38	0.45	0.346787	9.19e-05	1	0	-0.01	1	0	0.09	0.98	0.00877392	0.09	1	0	-0.02	1	0	-0.12	0.96	0.0177288	-0.23	0.64	0.19382	0.07	1	0	-0.13	1	0	-0.14	1	0
FBgn0024250	brk	-0.26	1	0	-0.2	1	0	-0.25	1	0	0.04	1	0	0.15	0.93	0.0315171	-0.18	1	0	0.09	1	0	-0.43	0.96	0.0177288	-0.32	1	0	-0.28	0.46	0.337242	-0.31	0.46	0.337242	-0.25	0.57	0.244125	-0.46	0.53	0.275724	-0.42	0.65	0.187087	-0.49	0.44	0.356547
FBgn0000212	brm	-0.32	1	0	-0.2	1	0	-0.29	0.93	0.0315171	-0.04	1	0	-0.12	0.9	0.0457575	0.23	1	0	0.12	1	0	-0.00972	1	0	-0.06	1	0	0.04	1	0	0.13	0.92	0.0362122	-0.05	1	0	0.03	1	0	0.04	1	0	-0.22	0.93	0.0315171
FBgn0030434	Brms1	0.13	1	0	0.05	1	0	0.18	1	0	-0.26	1	0	-0.43	0.43	0.366532	0.06	1	0	-0.04	1	0	0.11	0.96	0.0177288	0.08	1	0	-0.09	1	0	-0.00364	1	0	-0.11	0.97	0.0132283	0.16	0.96	0.0177288	-0.05	1	0	-0.09	1	0
FBgn0000221	brn	0.27	1	0	0.11	1	0	0.06	1	0	-0.21	1	0	-0.27	0.84	0.0757207	0.23	1	0	0.00938	1	0	0.14	1	0	0.22	1	0	0.58	0.33	0.481486	0.46	0.61	0.21467	0.6	0.29	0.537602	0.27	0.96	0.0177288	0.2	1	0	0.14	1	0
FBgn0013755	Bro	2.22	0.99	0.00436481	0.85	1	0	0.74	1	0	-0.22	1	0	0.28	1	0	-0.43	1	0	-0.42	1	0	0.39	1	0	-4	1	0	0.76	0.97	0.0132283	-0.72	1	0	0.29	1	0	-0.28	1	0	0.18	1	0	-1.44	0.95	0.0222764
FBgn0259246	brp	-0.08	1	0	0.08	1	0	0.02	1	0	0.42	1	0	0.79	0.08	1.09691	-0.0055	1	0	0.1	1	0	-0.58	0.76	0.119186	-0.22	1	0	0.01	1	0	0.02	1	0	-0.21	0.59	0.229148	-0.07	0.99	0.00436481	0.05	1	0	-0.07	1	0
FBgn0261787	bru	-0.00796	1	0	-0.06	1	0	-0.1	1	0	0.08	1	0	-0.06	1	0	0.19	1	0	-0.07	1	0	-0.02	1	0	-0.24	1	0	-0.21	0.66	0.180456	-0.19	0.76	0.119186	-0.14	0.85	0.0705811	0.13	0.97	0.0132283	0.08	1	0	-0.02	1	0
FBgn0262475	bru-2	-0.06	1	0	0.15	1	0	0.05	1	0	0.85	0.00778	2.10902	0.73	0.05	1.30103	0.46	0.94	0.0268721	0.55	1	0	0.11	1	0	0.25	1	0	0.59	0.00925	2.03386	0.42	0.18	0.744727	0.52	0.04	1.39794	0.24	0.9	0.0457575	0.28	0.91	0.0409586	0.18	1	0
FBgn0264001	bru-3	-0.19	1	0	-0.09	1	0	-0.04	1	0	0.37	1	0	0.45	0.54	0.267606	0.00541	1	0	0.06	1	0	-0.43	0.96	0.0177288	-0.45	1	0	0.13	0.86	0.0655015	0.2	0.73	0.136677	-0.14	0.86	0.0655015	-0.03	1	0	-0.07	1	0	-0.12	1	0
FBgn0266717	Bruce	-0.08	1	0	-0.00239	1	0	-0.14	1	0	0.09	1	0	0.16	0.91	0.0409586	0.1	1	0	0.06	1	0	-0.17	0.96	0.0177288	-0.04	1	0	0.00678	1	0	-0.03	1	0	-0.04	1	0	-0.05	1	0	0.00879	1	0	-0.08	1	0
FBgn0036874	brv1	0.55	1	0	-0.09	1	0	0.46	1	0	-0.53	1	0	0.36	1	0	0.27	1	0	-0.97	1	0	-1.1	0.96	0.0177288	-1.3	1	0	0.2	0.96	0.0177288	0.2	0.96	0.0177288	0.22	0.94	0.0268721	0.04	1	0	0.04	1	0	0.17	1	0
FBgn0036712	brv2	1.19	0.66	0.180456	0.97	1	0	1.03	0.66	0.180456	0.03	1	0	3.23	0.84	0.0757207	2.31	1	0	-0.07	1	0	2.18	0.96	0.0177288	0.08	1	0	0.34	0.77	0.113509	0.25	0.92	0.0362122	0.43	0.6	0.221849	0.11	1	0	0.01	1	0	0.24	1	0
FBgn0040333	brv3	0.79	0.69	0.161151	0.73	1	0	0.85	0.43	0.366532	-1.35	1	0	-1.38	0.82	0.0861861	-0.78	1	0	-0.68	1	0	-0.35	1	0	-0.22	1	0	0.12	0.98	0.00877392	0.13	0.97	0.0132283	0.1	1	0	0.19	0.98	0.00877392	0.32	0.99	0.00436481	0.44	0.8	0.09691
FBgn0011785	BRWD3	-0.23	1	0	-0.08	1	0	-0.1	1	0	0.05	1	0	0.11	0.95	0.0222764	0.23	1	0	0.08	1	0	-0.09	0.96	0.0177288	-0.07	1	0	-0.01	1	0	0.01	1	0	-0.1	0.94	0.0268721	0.2	0.95	0.0222764	0.22	1	0	-0.05	1	0
FBgn0004101	bs	-0.34	1	0	-0.23	1	0	-0.19	1	0	-0.2	1	0	-0.1	1	0	0.12	1	0	0.04	1	0	0.19	0.96	0.0177288	0.06	1	0	0.19	0.86	0.0655015	0.12	0.97	0.0132283	0.09	1	0	0.00762	1	0	0.05	1	0	-0.14	1	0
FBgn0032679	bsf	-0.37	0.96	0.0177288	-0.29	1	0	-0.24	1	0	0.31	1	0	0.27	0.66	0.180456	0.21	1	0	0.18	1	0	0.13	0.96	0.0177288	0.22	1	0	-0.04	1	0	0.21	0.65	0.187087	-0.05	1	0	0.13	0.93	0.0315171	-0.13	1	0	-0.08	1	0
FBgn0261822	Bsg	-0.09	1	0	0.03	1	0	-0.03	1	0	0.21	1	0	0.16	0.9	0.0457575	0.01	1	0	-0.17	1	0	-0.14	0.96	0.0177288	-0.16	1	0	0.13	0.9	0.0457575	0.07	1	0	-0.08	0.98	0.00877392	-0.14	0.89	0.05061	-0.15	0.94	0.0268721	-0.17	0.87	0.0604807
FBgn0000227	Bsg25A	#N/A	#N/A	#N/A	#N/A	#N/A	#N/A	#N/A	#N/A	#N/A	0.11	1	0	0.08	1	0	0.18	1	0	-1.13	1	0	-0.17	1	0	-0.92	1	0	#N/A	#N/A	#N/A	#N/A	#N/A	#N/A	#N/A	#N/A	#N/A	#N/A	#N/A	#N/A	#N/A	#N/A	#N/A	#N/A	#N/A	#N/A
FBgn0000228	Bsg25D	-0.2	1	0	-0.19	1	0	-0.24	1	0	-0.08	1	0	-0.22	0.78	0.107905	-0.00809	1	0	-0.15	1	0	-0.06	1	0	-0.05	1	0	-0.12	0.91	0.0409586	-0.07	1	0	-0.06	1	0	0.08	0.99	0.00436481	-0.15	0.95	0.0222764	-0.06	1	0
FBgn0000529	bsh	-0.19	1	0	-0.53	1	0	0.01	1	0	-0.97	1	0	0.06	1	0	-1.87	1	0	-0.03	1	0	-1.91	0.78	0.107905	-0.61	1	0	-0.44	0.94	0.0268721	0.28	1	0	0.29	0.98	0.00877392	0.21	1	0	-0.25	1	0	0.31	1	0
FBgn0000229	bsk	-0.09	1	0	-0.07	1	0	-0.00872	1	0	0.2	1	0	0.14	0.9	0.0457575	-0.17	1	0	-0.2	1	0	-0.25	0.96	0.0177288	-0.15	1	0	0.06	1	0	0.09	0.97	0.0132283	0.02	1	0	-0.04	1	0	-0.03	1	0	0.03	1	0
FBgn0005666	bt	-0.63	0.87	0.0604807	-0.37	1	0	-1.1	0.15	0.823909	-0.12	1	0	0.57	0.42	0.376751	-0.57	1	0	0.07	1	0	-0.48	0.75	0.124939	-0.35	1	0	-0.39	0.35	0.455932	0.12	0.97	0.0132283	-0.52	0.1	1	-0.23	0.81	0.091515	0.08	1	0	0.06	1	0
FBgn0030228	BTBD9	0.04	1	0	0.08	1	0	-0.04	1	0	-0.2	1	0	-0.28	0.71	0.148742	-0.06	1	0	-0.1	1	0	-0.11	0.96	0.0177288	-0.02	1	0	0.17	0.85	0.0705811	0.14	0.94	0.0268721	0.24	0.64	0.19382	0.24	0.89	0.05061	0.22	0.98	0.00877392	0.3	0.8	0.09691
FBgn0263108	BtbVII	-0.11	1	0	-0.16	1	0	-0.03	1	0	-0.08	1	0	-0.18	0.83	0.0809219	0.06	1	0	0.03	1	0	-0.00336	1	0	-0.06	1	0	-0.11	0.93	0.0315171	-0.18	0.76	0.119186	-0.13	0.85	0.0705811	0.13	0.92	0.0362122	0.05	1	0	-0.06	1	0
FBgn0000233	btd	-0.83	0.92	0.0362122	-0.56	1	0	0.02	1	0	-0.07	1	0	-0.04	1	0	-0.66	1	0	-0.17	1	0	-1.53	0.8	0.09691	-0.3	1	0	0.2	1	0	0.5	0.94	0.0268721	-0.18	1	0	-0.53	0.92	0.0362122	-0.51	1	0	-1.16	0.43	0.366532
FBgn0029848	Btd	-0.75	0.75	0.124939	-0.73	1	0	-0.92	0.36	0.443697	-0.11	1	0	0.59	0.64	0.19382	-0.58	1	0	0.22	1	0	-0.08	1	0	-0.35	1	0	0.26	1	0	0.11	1	0	-0.5	0.99	0.00436481	1.48	0.78	0.107905	1.34	0.91	0.0409586	1.19	0.97	0.0132283
FBgn0025679	Bteb2	2.13	0.82	0.0861861	1.45	1	0	0.39	1	0	3.26	1	0	3.23	0.84	0.0757207	2.31	1	0	0.89	1	0	0.76	0.98	0.00877392	0.17	1	0	-3.32	0.84	0.0757207	-0.19	1	0	-3.27	0.85	0.0705811	-1.25	0.93	0.0315171	-1.57	0.97	0.0132283	-1.18	1	0
FBgn0030501	BthD	-0.29	1	0	0.12	1	0	-0.17	1	0	-0.29	1	0	-0.42	0.51	0.29243	0.08	1	0	-0.09	1	0	0.02	1	0	-0.03	1	0	-0.39	0.95	0.0222764	0.36	0.97	0.0132283	0.03	1	0	2.49	0.00691	2.16052	1.14	0.68	0.167491	0.73	0.99	0.00436481
FBgn0003502	Btk29A	-0.09	1	0	-0.03	1	0	-0.08	1	0	-0.26	1	0	-0.42	0.38	0.420216	-0.03	1	0	-0.15	1	0	0.01	1	0	-0.05	1	0	-0.24	0.5	0.30103	-0.17	0.8	0.09691	-0.19	0.67	0.173925	0.12	1	0	-0.23	1	0	-0.38	0.71	0.148742
FBgn0005592	btl	-0.14	1	0	-0.23	1	0	-0.04	1	0	0.27	1	0	0.57	0.59	0.229148	-0.36	1	0	-0.48	1	0	-0.77	0.75	0.124939	-0.6	1	0	-0.18	0.91	0.0409586	-0.1	1	0	-0.15	0.94	0.0268721	-0.16	0.98	0.00877392	-0.11	1	0	-0.01	1	0
FBgn0014949	btn	3.13	1	0	2.39	1	0	-0.06	1	0	0.03	1	0	0.13	1	0	2.31	1	0	2.28	1	0	2.18	0.96	0.0177288	0.08	1	0	4.28	0.72	0.142668	3.96	0.82	0.0861861	2.29	0.95	0.0222764	-0.03	1	0	3.31	0.98	0.00877392	3.17	1	0
FBgn0266756	btsz	-0.08	1	0	-0.04	1	0	-0.09	1	0	0.02	1	0	0.34	0.58	0.236572	-0.14	1	0	-0.2	1	0	-0.68	0.06	1.22185	-0.4	1	0	-0.17	0.74	0.130768	-0.12	0.92	0.0362122	-0.21	0.57	0.244125	-0.19	0.92	0.0362122	-0.07	1	0	-0.15	1	0
FBgn0023096	btv	0.16	1	0	0.34	1	0	0.76	1	0	0.27	1	0	0.4	0.85	0.0705811	-0.7	1	0	0.21	1	0	-0.42	0.96	0.0177288	-0.42	1	0	0.02	1	0	0.33	0.59	0.229148	-0.11	0.97	0.0132283	0.1	1	0	0.06	1	0	0.02	1	0
FBgn0045862	btz	-0.18	1	0	-0.03	1	0	-0.12	1	0	-0.06	1	0	-0.09	1	0	0.14	1	0	0.08	1	0	0.03	1	0	0.00794	1	0	-0.09	0.98	0.00877392	-0.05	1	0	0.05	1	0	0.21	0.92	0.0362122	-0.03	1	0	-0.09	1	0
FBgn0031696	Bub1	-0.08	1	0	-0.06	1	0	-0.11	1	0	-0.21	1	0	-0.31	0.63	0.200659	0.05	1	0	-0.00836	1	0	0.08	0.97	0.0132283	-0.000783	1	0	0.08	0.99	0.00436481	0.04	1	0	-0.00704	1	0	0.22	0.89	0.05061	0.04	1	0	0.08	1	0
FBgn0025457	Bub3	-0.000935	1	0	-0.03	1	0	-0.12	1	0	-0.11	1	0	-0.3	0.64	0.19382	0.11	1	0	-0.06	1	0	0.12	0.96	0.0177288	-0.01	1	0	0.17	0.94	0.0268721	-0.000761	1	0	0.03	1	0	0.63	0.35	0.455932	0.24	1	0	0.13	1	0
FBgn0263855	BubR1	-0.13	1	0	0.08	1	0	-0.09	1	0	-0.36	1	0	-0.54	0.23	0.638272	0.02	1	0	-0.07	1	0	0.09	0.96	0.0177288	-0.01	1	0	0.35	0.56	0.251812	0.15	0.97	0.0132283	0.22	0.85	0.0705811	1.08	0.11	0.958607	0.41	0.98	0.00877392	0.08	1	0
FBgn0040491	Buffy	0.23	1	0	0.05	1	0	0.47	1	0	0.15	1	0	0.13	1	0	-0.36	1	0	0.18	1	0	0.02	1	0	0.000852	1	0	-0.07	1	0	-0.2	0.89	0.05061	-0.23	0.82	0.0861861	-0.23	0.89	0.05061	-0.12	1	0	-0.21	1	0
FBgn0032248	Bug22	0.24	1	0	0.22	1	0	0.48	0.59	0.229148	-0.06	1	0	-0.17	0.9	0.0457575	0.09	1	0	0.04	1	0	0.18	0.96	0.0177288	0.16	1	0	0.2	0.72	0.142668	0.33	0.37	0.431798	0.31	0.36	0.443697	0.18	0.82	0.0861861	0.19	0.83	0.0809219	0.24	0.57	0.244125
FBgn0259176	bun	-0.04	1	0	0.03	1	0	0.06	1	0	0.12	1	0	0.09	0.99	0.00436481	0.11	1	0	-0.05	1	0	0.00215	1	0	-0.09	1	0	0.05	1	0	-0.08	1	0	-0.08	1	0	-0.17	0.82	0.0861861	-0.15	0.94	0.0268721	-0.35	0.13	0.886057
FBgn0000239	bur	-0.13	1	0	0.04	1	0	-0.14	1	0	0.000889	1	0	-0.13	0.9	0.0457575	0.08	1	0	-0.05	1	0	0.14	0.96	0.0177288	0.02	1	0	-0.09	0.96	0.0177288	-0.02	1	0	-0.02	1	0	0.07	0.99	0.00436481	0.00729	1	0	-0.05	1	0
FBgn0038901	Burs	-2.17	0.77	0.113509	-0.19	1	0	-0.97	1	0	1.48	1	0	1.66	0.77	0.113509	-0.11	1	0	0.1	1	0	-0.45	1	0	-0.92	1	0	-0.57	1	0	-1.11	0.96	0.0177288	-1.02	0.94	0.0268721	0.38	0.97	0.0132283	0.71	0.94	0.0268721	0.99	0.64	0.19382
FBgn0031150	bves	-0.29	1	0	-0.26	1	0	-0.05	1	0	0.12	1	0	0.09	0.99	0.00436481	0.17	1	0	0.04	1	0	0.13	0.96	0.0177288	0.13	1	0	0.03	1	0	-0.0068	1	0	0.05	1	0	0.1	1	0	0.02	1	0	-0.000722	1	0
FBgn0000241	bw	0.31	1	0	-0.01	1	0	0.19	1	0	-0.15	1	0	0.32	0.87	0.0604807	-0.17	1	0	-0.27	1	0	-0.41	0.96	0.0177288	-0.24	1	0	-0.58	0.13	0.886057	-0.63	0.11	0.958607	-0.63	0.09	1.04576	-0.49	0.67	0.173925	-0.46	0.77	0.113509	-0.51	0.64	0.19382
FBgn0045064	bwa	0.21	1	0	0.1	1	0	0.3	0.97	0.0132283	0.03	1	0	0.03	1	0	-0.43	1	0	0.02	1	0	-0.03	1	0	-0.04	1	0	-0.02	1	0	-0.03	1	0	-0.02	1	0	-0.14	0.96	0.0177288	-0.29	0.63	0.200659	-0.08	1	0
FBgn0265598	Bx	-0.12	1	0	0.03	1	0	-0.21	1	0	0.08	1	0	-0.16	0.9	0.0457575	0.1	1	0	0.16	1	0	0.42	0.46	0.337242	0.14	1	0	-0.12	0.94	0.0268721	0.07	1	0	-0.03	1	0	0.21	0.92	0.0362122	-0.02	1	0	-0.12	1	0
FBgn0004856	Bx42	-0.07	1	0	-0.13	1	0	-0.04	1	0	-0.08	1	0	-0.17	0.85	0.0705811	0.09	1	0	-0.03	1	0	0.12	0.96	0.0177288	0.05	1	0	-0.07	1	0	-0.11	0.96	0.0177288	-0.09	0.96	0.0177288	0.19	0.94	0.0268721	0.06	1	0	-0.03	1	0
FBgn0020556	bxd	-0.8	1	0	-1.1	1	0	-0.36	1	0	0.71	1	0	1.34	0.69	0.161151	1.33	1	0	-0.03	1	0	0.14	1	0	-1.6	1	0	-0.96	0.91	0.0409586	-0.01	1	0	-1.26	0.82	0.0861861	-0.03	1	0	0.18	1	0	-0.65	1	0
FBgn0000244	by	-0.28	1	0	-0.03	1	0	-0.62	0.5	0.30103	0.06	1	0	0.25	0.75	0.124939	-0.22	1	0	-0.03	1	0	-0.19	0.96	0.0177288	-0.22	1	0	-0.04	1	0	-0.15	0.84	0.0757207	-0.13	0.86	0.0655015	-0.12	0.97	0.0132283	-0.1	1	0	-0.07	1	0
FBgn0011723	byn	0.11	1	0	-0.25	1	0	-0.04	1	0	0.68	1	0	0.59	0.72	0.142668	0.25	1	0	0.95	1	0	0.24	1	0	0.34	1	0	0.02	1	0	-0.15	0.98	0.00877392	-0.12	1	0	-0.09	1	0	0.00716	1	0	-0.24	1	0
FBgn0010292	bys	-0.29	1	0	-0.21	1	0	-0.26	1	0	0.04	1	0	-0.12	0.9	0.0457575	0.02	1	0	0.08	1	0	0.24	0.96	0.0177288	0.17	1	0	-0.17	0.89	0.05061	-0.07	1	0	-0.26	0.67	0.173925	0.46	0.52	0.283997	0.16	1	0	0.05	1	0
FBgn0011566	Bzd	-0.21	1	0	-0.00269	1	0	-0.19	1	0	-0.09	1	0	-0.31	0.72	0.142668	0.06	1	0	0.06	1	0	0.07	1	0	-0.00426	1	0	0.04	1	0	0.22	0.92	0.0362122	-0.17	0.94	0.0268721	0.24	0.96	0.0177288	-0.01	1	0	-0.08	1	0
FBgn0028525	c(2)M	-0.21	1	0	0.05	1	0	0.09	1	0	0.14	1	0	-0.06	1	0	0.21	1	0	0.05	1	0	0.24	0.96	0.0177288	0.13	1	0	0.55	0.81	0.091515	0.51	0.88	0.0555173	-0.27	0.99	0.00436481	2.63	0.02	1.69897	1.17	0.79	0.102373	-0.3	1	0
FBgn0000246	c(3)G	0.4	1	0	0.29	1	0	0.44	1	0	0.19	1	0	0.05	1	0	0.09	1	0	0.45	0.16	0.79588	0.65	0.000429	3.36754	0.37	0.83	0.0809219	0.14	0.99	0.00436481	0.15	0.99	0.00436481	-0.1	1	0	0.71	0.57	0.244125	-0.01	1	0	-0.13	1	0
FBgn0040236	c11.1	0.07	1	0	-0.03	1	0	-0.21	1	0	0.00328	1	0	-0.00956	1	0	0.03	1	0	0.17	1	0	-0.01	1	0	0.03	1	0	-0.15	0.8	0.09691	-0.1	0.96	0.0177288	-0.13	0.87	0.0604807	-0.07	1	0	0.05	1	0	0.00792	1	0
FBgn0040235	c12.1	-0.06	1	0	0.04	1	0	-0.07	1	0	-0.07	1	0	-0.16	0.9	0.0457575	-0.1	1	0	-0.08	1	0	0.07	1	0	-0.01	1	0	-0.03	1	0	-0.1	1	0	-0.25	0.76	0.119186	0.13	1	0	-0.04	1	0	-0.12	1	0
FBgn0040234	c12.2	-0.53	0.85	0.0705811	-0.29	1	0	-0.46	0.81	0.091515	0.16	1	0	0.08	1	0	0.1	1	0	0.02	1	0	-0.11	0.96	0.0177288	-0.01	1	0	0.02	1	0	-0.14	0.96	0.0177288	-0.13	0.94	0.0268721	-0.05	1	0	-0.08	1	0	-0.12	1	0
FBgn0004863	C15	0.06	1	0	0.06	1	0	-0.07	1	0	0.07	1	0	0.29	1	0	-0.38	1	0	-0.19	1	0	-0.5	1	0	0.46	1	0	0.24	1	0	0.29	0.98	0.00877392	0.09	1	0	-0.57	0.79	0.102373	-1.02	0.31	0.508638	-0.63	0.73	0.136677
FBgn0032078	C1GalTA	0.35	1	0	0.14	1	0	0.63	0.34	0.468521	-0.27	1	0	-0.2	0.81	0.091515	0.05	1	0	-0.04	1	0	0.14	0.96	0.0177288	0.08	1	0	0.14	0.86	0.0655015	0.03	1	0	0.12	0.91	0.0409586	-0.000799	1	0	-0.13	1	0	-0.2	1	0
FBgn0259228	C3G	-0.15	1	0	-0.11	1	0	-0.17	1	0	0.04	1	0	0.11	0.93	0.0315171	0.04	1	0	0.09	1	0	-0.1	0.96	0.0177288	0.00394	1	0	-0.03	1	0	-0.07	1	0	-0.11	0.91	0.0409586	-0.07	0.99	0.00436481	-0.08	1	0	-0.12	1	0
FBgn0021742	C901	1.34	1	0	0.03	1	0	1.3	1	0	0.03	1	0	0.13	1	0	5.15	1	0	0.36	1	0	-0.68	1	0	-1.22	1	0	2.36	0.69	0.161151	1.58	0.92	0.0362122	0.75	1	0	-0.24	1	0	0.18	1	0	-0.73	1	0
FBgn0000247	ca	-0.14	1	0	-0.04	1	0	-0.18	1	0	-0.04	1	0	-0.02	1	0	0.01	1	0	-0.03	1	0	-0.1	0.96	0.0177288	-0.06	1	0	-0.07	0.99	0.00436481	-0.08	0.98	0.00877392	-0.18	0.7	0.154902	-0.12	0.95	0.0222764	-0.05	1	0	-0.06	1	0
FBgn0001991	Ca-alpha1D	-0.22	1	0	0.05	1	0	0.12	1	0	0.06	1	0	0.57	0.24	0.619789	-0.35	1	0	0.28	1	0	-0.34	0.96	0.0177288	-0.17	1	0	-0.26	0.46	0.337242	-0.02	1	0	-0.34	0.19	0.721246	-0.11	0.96	0.0177288	0.05	1	0	-0.09	1	0
FBgn0264386	Ca-alpha1T	-0.31	1	0	0.03	1	0	-0.29	1	0	0.3	1	0	0.46	0.47	0.327902	-0.14	1	0	0.26	1	0	-0.34	0.96	0.0177288	0.09	1	0	0.04	1	0	-0.09	0.97	0.0132283	-0.22	0.56	0.251812	-0.13	0.93	0.0315171	-0.05	1	0	-0.17	0.88	0.0555173
FBgn0259822	Ca-beta	-0.31	1	0	-0.07	1	0	0.02	1	0	0.07	1	0	0.32	0.7	0.154902	-0.11	1	0	-0.06	1	0	-0.45	0.96	0.0177288	-0.18	1	0	-0.2	0.66	0.180456	0.05	1	0	-0.42	0.06	1.22185	-0.04	1	0	-0.08	1	0	-0.06	1	0
FBgn0025678	CaBP1	0.05	1	0	-0.06	1	0	-0.14	1	0	0.08	1	0	-0.04	1	0	0.21	1	0	0.01	1	0	0.14	0.96	0.0177288	0.09	1	0	0.12	0.89	0.05061	0.04	1	0	0.17	0.73	0.136677	-0.04	1	0	-0.26	0.5	0.30103	-0.17	0.88	0.0555173
FBgn0263111	cac	-0.22	1	0	-0.08	1	0	-0.07	1	0	0.24	1	0	0.4	0.53	0.275724	-0.15	1	0	0.05	1	0	-0.45	0.9	0.0457575	-0.32	1	0	-0.04	1	0	0.05	1	0	-0.18	0.72	0.142668	-0.12	0.94	0.0268721	-0.06	1	0	-0.06	1	0
FBgn0000250	cact	-0.11	1	0	-0.13	1	0	-0.07	1	0	-0.24	1	0	-0.22	0.81	0.091515	-0.01	1	0	0.01	1	0	0.1	0.99	0.00436481	0.06	1	0	-0.14	0.83	0.0809219	-0.06	1	0	-0.11	0.91	0.0409586	0.24	0.83	0.0809219	-0.1	1	0	0.33	0.56	0.251812
FBgn0031114	cactin	-0.18	1	0	-0.1	1	0	-0.15	1	0	0.06	1	0	0.04	1	0	0.22	1	0	0.07	1	0	-0.03	1	0	-0.06	1	0	0.04	1	0	0.15	0.96	0.0177288	0.21	0.85	0.0705811	0.3	0.91	0.0409586	0.04	1	0	-0.00597	1	0
FBgn0000251	cad	-0.26	1	0	-0.1	1	0	-0.35	1	0	-0.1	1	0	-0.2	0.84	0.0757207	0.17	1	0	-0.17	1	0	-0.00562	1	0	-0.09	1	0	0.04	1	0	0.16	0.84	0.0757207	0.15	0.85	0.0705811	0.35	0.61	0.21467	0.04	1	0	-0.06	1	0
FBgn0036715	Cad74A	-0.19	1	0	-0.06	1	0	-0.25	1	0	-0.46	1	0	0.18	0.92	0.0362122	0.44	1	0	0.41	1	0	0.32	0.95	0.0222764	0.09	1	0	0.04	1	0	0.15	0.96	0.0177288	0.05	1	0	1.53	0.04	1.39794	-0.01	1	0	-0.3	1	0
FBgn0261053	Cad86C	-0.12	1	0	-0.19	1	0	0.08	1	0	0.02	1	0	0.31	0.73	0.136677	-0.2	1	0	0.13	1	0	-0.43	0.96	0.0177288	-0.27	1	0	-0.09	0.96	0.0177288	-0.12	0.93	0.0315171	-0.11	0.93	0.0315171	-0.28	0.87	0.0604807	-0.1	1	0	-0.34	0.76	0.119186
FBgn0037963	Cad87A	-0.17	1	0	-0.13	1	0	-0.1	1	0	-0.11	1	0	-0.08	1	0	0.07	1	0	0.02	1	0	0.02	1	0	-0.02	1	0	-0.09	0.96	0.0177288	-0.16	0.83	0.0809219	-0.16	0.79	0.102373	0.17	0.96	0.0177288	-0.02	1	0	-0.13	1	0
FBgn0038247	Cad88C	-0.07	1	0	0.05	1	0	0.49	0.98	0.00877392	0.15	1	0	0.42	0.71	0.148742	0.51	1	0	0.7	1	0	-0.08	1	0	0.26	1	0	0.19	1	0	-0.41	0.89	0.05061	-0.21	0.99	0.00436481	0.33	0.96	0.0177288	0.3	1	0	-0.3	1	0
FBgn0038439	Cad89D	-0.1	1	0	-2.25	1	0	2.61	0.56	0.251812	-2.01	0.88	0.0555173	-0.14	1	0	-0.36	1	0	-0.79	1	0	-1.3	0.88	0.0555173	-1.49	1	0	-1.1	0.47	0.327902	-0.97	0.63	0.200659	-0.69	0.78	0.107905	-0.78	0.77	0.113509	0.16	1	0	-0.32	1	0
FBgn0022800	Cad96Ca	-0.12	1	0	-0.13	1	0	-0.07	1	0	0.09	1	0	0.57	0.55	0.259637	-0.17	1	0	0.13	1	0	-0.35	0.96	0.0177288	-0.03	1	0	-0.02	1	0	0.1	0.99	0.00436481	0.09	1	0	0.00302	1	0	-0.09	1	0	-0.02	1	0
FBgn0039294	Cad96Cb	0.09	1	0	0.02	1	0	0.21	1	0	-1.88	1	0	-1.38	0.8	0.09691	-0.31	1	0	1.38	1	0	0.39	1	0	-0.21	1	0	-1.6	0.4	0.39794	-0.98	0.77	0.113509	-1.16	0.61	0.21467	-0.3	1	0	-0.21	1	0	-0.81	0.84	0.0757207
FBgn0039709	Cad99C	-0.1	1	0	-0.14	1	0	-0.24	1	0	0.14	1	0	0.32	0.56	0.251812	0.29	1	0	0.09	1	0	-0.15	0.96	0.0177288	0.06	1	0	-0.2	0.75	0.124939	-0.06	1	0	-0.3	0.4	0.39794	-0.21	0.92	0.0362122	-0.13	1	0	-0.32	0.72	0.142668
FBgn0015609	CadN	-0.17	1	0	-0.17	1	0	-0.05	1	0	0.21	1	0	0.54	0.26	0.585027	-0.13	1	0	0.03	1	0	-0.48	0.78	0.107905	-0.24	1	0	-0.04	1	0	-0.00984	1	0	-0.21	0.59	0.229148	-0.18	0.81	0.091515	-0.11	1	0	-0.29	0.33	0.481486
FBgn0262018	CadN2	-0.06	1	0	-0.41	1	0	-0.11	1	0	0.3	1	0	0.48	0.71	0.148742	-0.37	1	0	0.43	1	0	-0.33	0.96	0.0177288	-0.08	1	0	-0.14	0.96	0.0177288	-0.2	0.9	0.0457575	-0.33	0.57	0.244125	-0.3	0.89	0.05061	-0.13	1	0	-0.33	0.88	0.0555173
FBgn0263979	Caf1	-0.17	1	0	-0.14	1	0	-0.15	1	0	-0.29	1	0	-0.42	0.45	0.346787	0.02	1	0	0.0063	1	0	0.2	0.96	0.0177288	0.07	1	0	0.05	1	0	0.08	1	0	-0.02	1	0	0.84	0.04	1.39794	0.33	0.91	0.0409586	0.06	1	0
FBgn0033526	Caf1-105	-0.15	1	0	0.05	1	0	-0.09	1	0	-0.33	1	0	-0.6	0.22	0.657577	0.17	1	0	-0.05	1	0	0.09	0.99	0.00436481	0.02	1	0	0.51	0.33	0.481486	0.36	0.71	0.148742	0.25	0.85	0.0705811	1.11	0.19	0.721246	0.49	0.97	0.0132283	0.22	1	0
FBgn0030054	Caf1-180	-0.43	1	0	0.14	1	0	-0.22	1	0	-0.15	1	0	-0.36	0.58	0.236572	0.15	1	0	-0.16	1	0	-0.04	1	0	-0.13	1	0	0.02	1	0	0.03	1	0	-0.2	0.96	0.0177288	2.08	0.01	2	1.17	0.5	0.30103	0.18	1	0
FBgn0017414	cag	0.05	1	0	0.03	1	0	0.23	1	0	-0.24	1	0	-0.43	0.57	0.244125	-0.01	1	0	0.1	1	0	0.37	0.88	0.0555173	0.13	1	0	-0.05	1	0	0.22	0.92	0.0362122	0.1	1	0	0.15	1	0	0.08	1	0	0.02	1	0
FBgn0027844	CAH1	-0.03	1	0	-0.21	1	0	0.13	1	0	0.12	1	0	0.17	0.89	0.05061	-0.4	1	0	-0.07	1	0	-0.63	0.37	0.431798	-0.32	1	0	-0.05	1	0	-0.26	0.49	0.309804	-0.17	0.74	0.130768	-0.3	0.3	0.522879	-0.23	0.65	0.187087	-0.23	0.58	0.236572
FBgn0027843	CAH2	0.59	0.53	0.275724	0.39	1	0	0.15	1	0	0.05	1	0	0.05	1	0	-0.22	1	0	0.04	1	0	-0.41	0.29	0.537602	-0.12	1	0	0.2	0.65	0.187087	0.04	1	0	0.09	0.95	0.0222764	-0.14	0.91	0.0409586	-0.1	1	0	-0.03	1	0
FBgn0037646	CAHbeta	-0.54	1	0	0.34	1	0	-0.57	1	0	-0.14	1	0	-0.1	1	0	0.02	1	0	-0.07	1	0	-0.03	1	0	-0.03	1	0	-0.24	0.61	0.21467	-0.35	0.36	0.443697	-0.00722	1	0	-0.22	0.91	0.0409586	-0.5	0.27	0.568636	-0.29	0.79	0.102373
FBgn0038478	cal1	-0.07	1	0	0.01	1	0	0.2	1	0	-0.29	1	0	-0.51	0.23	0.638272	0.05	1	0	-0.04	1	0	0.06	1	0	0.03	1	0	-0.1	0.96	0.0177288	0.05	1	0	0.15	0.84	0.0757207	0.18	0.96	0.0177288	-0.2	1	0	0.06	1	0
FBgn0012051	CalpA	-0.1	1	0	0.04	1	0	-0.19	1	0	0.2	1	0	0.27	0.72	0.142668	-0.06	1	0	0.17	1	0	-0.03	1	0	0.15	1	0	-0.24	0.51	0.29243	-0.00148	1	0	-0.1	0.94	0.0268721	-0.07	1	0	-0.06	1	0	0.00325	1	0
FBgn0025866	CalpB	-0.12	1	0	-0.04	1	0	-0.19	1	0	-0.17	1	0	-0.14	0.9	0.0457575	0.03	1	0	-0.03	1	0	0.05	1	0	-0.07	1	0	-0.28	0.35	0.455932	-0.08	0.99	0.00436481	-0.29	0.32	0.49485	0.05	1	0	-0.14	0.98	0.00877392	-0.05	1	0
FBgn0260450	CalpC	-0.1	1	0	-0.07	1	0	-0.07	1	0	-0.21	1	0	-0.36	0.65	0.187087	0.12	1	0	0.03	1	0	0.12	0.99	0.00436481	-0.00123	1	0	-0.25	0.75	0.124939	-0.08	1	0	0.00837	1	0	0.02	1	0	-0.11	1	0	-0.09	1	0
FBgn0039928	Cals	-0.12	1	0	-0.08	1	0	-0.02	1	0	0.19	1	0	0.26	0.72	0.142668	-0.17	1	0	-0.05	1	0	-0.32	0.64	0.19382	-0.1	1	0	-0.07	1	0	0.02	1	0	-0.12	0.94	0.0268721	-0.15	0.88	0.0555173	-0.14	0.97	0.0132283	-0.11	1	0
FBgn0013995	Calx	-0.12	1	0	-0.32	1	0	-0.35	1	0	-0.12	1	0	-0.1	0.95	0.0222764	-0.02	1	0	-0.02	1	0	0.09	0.96	0.0177288	0.06	1	0	-0.08	1	0	0.00188	1	0	-0.08	1	0	-0.00198	1	0	0.06	1	0	0.08	1	0
FBgn0262166	calypso	-0.05	1	0	-0.02	1	0	0.06	1	0	0.1	1	0	-0.12	1	0	0.22	1	0	0.14	1	0	0.22	0.96	0.0177288	0.08	1	0	0.13	0.95	0.0222764	-0.02	1	0	0.16	0.9	0.0457575	0.37	0.88	0.0555173	0.25	1	0	0.06	1	0
FBgn0000253	Cam	-0.21	1	0	-0.09	1	0	-0.18	1	0	0.12	1	0	0.07	1	0	0.22	1	0	-0.0092	1	0	-0.06	1	0	0.00645	1	0	0.33	0.52	0.283997	0.18	0.91	0.0409586	0.04	1	0	0.07	1	0	-0.08	1	0	0.03	1	0
FBgn0016126	CaMKI	-0.09	1	0	0.32	1	0	0.07	1	0	0.08	1	0	0.12	0.93	0.0315171	-0.09	1	0	-0.1	1	0	0.02	1	0	-0.05	1	0	-0.08	1	0	-0.08	1	0	-0.05	1	0	-0.27	0.37	0.431798	-0.24	0.59	0.229148	-0.27	0.39	0.408935
FBgn0264607	CaMKII	-0.26	1	0	-0.15	1	0	-0.19	1	0	0.05	1	0	0.06	1	0	-0.07	1	0	-0.04	1	0	-0.00332	1	0	-0.03	1	0	-0.23	0.49	0.309804	0.05	1	0	-0.17	0.73	0.136677	-0.03	1	0	0.09	1	0	0.06	1	0
FBgn0259234	Camta	-0.19	1	0	0.01	1	0	-0.08	1	0	0.09	1	0	0.07	1	0	0.11	1	0	-0.000109	1	0	-0.16	0.96	0.0177288	-0.12	1	0	0.07	1	0	0.14	0.88	0.0555173	-0.02	1	0	-0.02	1	0	-0.01	1	0	-0.09	1	0
FBgn0011569	can	0.58	1	0	0.68	1	0	0.55	0.91	0.0409586	-0.63	1	0	-1.14	0.82	0.0861861	-1.23	1	0	-1.42	1	0	0.74	0.98	0.00877392	-1.22	1	0	0.29	0.76	0.119186	0.12	1	0	-0.12	0.99	0.00436481	-0.11	1	0	-0.08	1	0	-0.19	1	0
FBgn0040233	cana	-0.12	1	0	-0.07	1	0	-0.07	1	0	-0.15	1	0	-0.34	0.57	0.244125	0.06	1	0	-0.06	1	0	0.07	1	0	-0.01	1	0	0.04	1	0	0.14	0.87	0.0604807	0.06	1	0	0.14	0.96	0.0177288	-0.03	1	0	-0.00365	1	0
FBgn0010015	CanA1	-0.31	1	0	0.2	1	0	-0.53	0.75	0.124939	-0.27	1	0	0.26	0.84	0.0757207	-0.63	0.79	0.102373	-0.06	1	0	-0.66	0.89	0.05061	-0.15	1	0	-0.57	0.00454	2.34294	-0.01	1	0	-0.43	0.08	1.09691	-0.39	0.54	0.267606	-0.11	1	0	-0.21	1	0
FBgn0030758	CanA-14F	-0.11	1	0	-0.13	1	0	-0.04	1	0	-0.14	1	0	-0.1	0.97	0.0132283	0.06	1	0	-0.06	1	0	-0.06	1	0	-0.19	1	0	0.01	1	0	-0.07	1	0	-0.16	0.76	0.119186	-0.05	1	0	0.04	1	0	-0.15	0.94	0.0268721
FBgn0010014	CanB	-0.06	1	0	0.07	1	0	0.34	1	0	0.13	1	0	0.3	0.84	0.0757207	-0.23	1	0	0.12	1	0	-0.33	0.96	0.0177288	-0.33	1	0	0.22	0.7	0.154902	0.12	0.96	0.0177288	-0.02	1	0	-0.1	1	0	-0.06	1	0	-0.12	1	0
FBgn0015614	CanB2	0.1	1	0	-0.00922	1	0	-0.06	1	0	0.08	1	0	-0.16	0.85	0.0705811	0.03	1	0	0.04	1	0	0.19	0.96	0.0177288	0.03	1	0	0.05	1	0	-0.02	1	0	-0.05	1	0	0.12	0.95	0.0222764	-0.03	1	0	-0.05	1	0
FBgn0027568	Cand1	-0.01	1	0	0.03	1	0	-0.03	1	0	-0.09	1	0	-0.12	0.9	0.0457575	0.03	1	0	-0.01	1	0	0.02	1	0	-0.000367	1	0	0.13	0.85	0.0705811	-0.000106	1	0	0.13	0.85	0.0705811	0.11	0.96	0.0177288	0.1	1	0	0.1	1	0
FBgn0033504	CAP	-0.27	1	0	0.05	1	0	-0.27	1	0	-0.1	1	0	0.35	0.54	0.267606	-0.27	1	0	-0.08	1	0	-0.5	0.47	0.327902	-0.27	1	0	-0.34	0.4	0.39794	-0.08	1	0	-0.5	0.07	1.1549	-0.12	1	0	-0.00981	1	0	-0.06	1	0
FBgn0263006	Ca-P60A	-0.35	1	0	-0.04	1	0	-0.83	0.38	0.420216	-0.09	1	0	0.42	0.63	0.200659	-0.34	1	0	-0.14	1	0	-0.49	0.59	0.229148	-0.3	1	0	-0.3	0.62	0.207608	-0.15	0.96	0.0177288	-0.44	0.26	0.585027	-0.28	0.69	0.161151	0.32	0.58	0.236572	0.3	0.58	0.236572
FBgn0039722	Capa	-0.16	1	0	-0.36	1	0	-0.23	1	0	0.31	1	0	0.26	0.9	0.0457575	0.12	1	0	0.23	1	0	-0.22	1	0	0.13	1	0	-0.11	0.96	0.0177288	0.11	0.98	0.00877392	0.11	0.96	0.0177288	-0.14	1	0	-0.37	0.91	0.0409586	-0.27	1	0
FBgn0037100	CapaR	-0.95	1	0	0.16	1	0	-0.71	1	0	0.71	1	0	0.71	0.63	0.200659	0.48	1	0	-0.43	1	0	-0.19	1	0	0.35	1	0	-0.13	1	0	0.16	0.98	0.00877392	0.02	1	0	-0.65	0.72	0.142668	-0.06	1	0	-0.19	1	0
FBgn0039680	Cap-D2	0.0068	1	0	-0.03	1	0	-0.09	1	0	-0.27	1	0	-0.51	0.28	0.552842	0.12	1	0	0.000747	1	0	0.06	1	0	0.04	1	0	-0.18	0.95	0.0222764	0.07	1	0	-0.01	1	0	1.07	0.27	0.568636	0.23	1	0	-0.24	1	0
FBgn0051989	Cap-D3	-0.07	1	0	-0.02	1	0	-0.24	1	0	-0.38	1	0	-0.4	0.49	0.309804	-0.21	1	0	-0.31	1	0	-0.26	0.96	0.0177288	-0.21	1	0	-0.08	1	0	0.06	1	0	-0.16	0.94	0.0268721	0.09	1	0	-0.05	1	0	0.04	1	0
FBgn0031883	Caper	-0.08	1	0	-0.12	1	0	-0.04	1	0	-0.04	1	0	-0.09	0.98	0.00877392	0.07	1	0	0.04	1	0	0.11	0.96	0.0177288	-0.00564	1	0	-0.09	0.96	0.0177288	-0.14	0.88	0.0555173	-0.00542	1	0	-0.07	0.99	0.00436481	-0.18	0.87	0.0604807	-0.29	0.33	0.481486
FBgn0259876	Cap-G	0.06	1	0	0.1	1	0	0.14	1	0	-0.26	1	0	-0.4	0.45	0.346787	0.13	1	0	0.00979	1	0	0.15	0.96	0.0177288	0.04	1	0	0.33	0.42	0.376751	0.19	0.86	0.0655015	0.33	0.39	0.408935	0.41	0.46	0.337242	0.31	0.77	0.113509	0.25	0.92	0.0362122
FBgn0037831	Cap-H2	-0.32	1	0	-0.29	1	0	-0.35	1	0	0.18	1	0	0.25	0.75	0.124939	0.06	1	0	0.03	1	0	0.00613	1	0	0.05	1	0	-0.16	0.81	0.091515	0.07	1	0	-0.06	1	0	0.1	1	0	-0.03	1	0	-0.04	1	0
FBgn0042134	Capr	-0.17	1	0	-0.1	1	0	-0.04	1	0	0.04	1	0	-0.13	0.9	0.0457575	0.19	1	0	-0.02	1	0	0.03	1	0	-0.1	1	0	0.09	0.96	0.0177288	0.00206	1	0	0.13	0.87	0.0604807	0.39	0.38	0.420216	0.09	1	0	-0.01	1	0
FBgn0053653	Caps	-0.16	1	0	-0.15	1	0	-0.02	1	0	0.17	1	0	0.48	0.34	0.468521	-0.16	1	0	-0.02	1	0	-0.08	1	0	-0.22	1	0	-0.04	1	0	0.11	0.97	0.0132283	-0.16	0.85	0.0705811	-0.18	0.96	0.0177288	-0.03	1	0	-0.13	1	0
FBgn0023095	caps	-0.15	1	0	-0.06	1	0	-0.13	1	0	0.1	1	0	0.28	0.68	0.167491	-0.13	1	0	0.1	1	0	-0.19	0.96	0.0177288	-0.13	1	0	0.13	0.85	0.0705811	0.04	1	0	0.09	0.94	0.0268721	-0.04	1	0	0.00118	1	0	-0.18	1	0
FBgn0261458	capt	-0.08	1	0	-0.19	1	0	-0.31	0.93	0.0315171	-0.05	1	0	-0.13	0.9	0.0457575	0.09	1	0	-0.15	1	0	-0.08	0.97	0.0132283	-0.07	1	0	-0.25	0.45	0.346787	-0.18	0.77	0.113509	-0.29	0.31	0.508638	-0.05	1	0	-0.08	1	0	0.06	1	0
FBgn0000256	capu	0.26	1	0	0.21	1	0	0.29	0.95	0.0222764	-0.15	1	0	-0.09	1	0	-0.1	1	0	-0.05	1	0	-0.17	0.96	0.0177288	-0.08	1	0	0.11	0.96	0.0177288	0.02	1	0	0.08	1	0	-0.04	1	0	-0.03	1	0	0.1	1	0
FBgn0000257	car	-0.0024	1	0	-0.02	1	0	-0.04	1	0	-0.1	1	0	-0.18	0.84	0.0757207	-0.04	1	0	-0.09	1	0	0.11	0.96	0.0177288	-0.01	1	0	-0.12	0.97	0.0132283	-0.11	1	0	-0.14	0.94	0.0268721	-0.1	1	0	-0.15	1	0	-0.13	1	0
FBgn0022213	Cas	-0.27	1	0	-0.2	1	0	-0.29	0.94	0.0268721	-0.18	1	0	-0.4	0.45	0.346787	0.14	1	0	-0.00141	1	0	0.16	0.96	0.0177288	0.08	1	0	-0.03	1	0	0.02	1	0	-0.03	1	0	0.66	0.2	0.69897	0.08	1	0	-0.19	1	0
FBgn0004878	cas	0.02	1	0	0.05	1	0	0.34	1	0	-0.97	1	0	-0.92	0.72	0.142668	-0.41	1	0	0.62	1	0	-0.38	1	0	0.45	1	0	0.58	0.92	0.0362122	-0.1	1	0	-0.21	1	0	-0.45	0.94	0.0268721	-1.15	0.4	0.39794	-0.63	0.89	0.05061
FBgn0013759	CASK	-0.09	1	0	-0.05	1	0	-0.12	1	0	0.07	1	0	0.08	1	0	0.05	1	0	0.16	1	0	0.04	1	0	0.00775	1	0	-0.02	1	0	-0.12	0.91	0.0409586	-0.11	0.9	0.0457575	-0.04	1	0	-0.06	1	0	-0.17	0.86	0.0655015
FBgn0034068	casp	0.17	1	0	0.04	1	0	0.06	1	0	-0.11	1	0	-0.22	0.81	0.091515	0.09	1	0	-0.07	1	0	-0.04	1	0	-0.03	1	0	0.13	0.87	0.0604807	0.13	0.91	0.0409586	0.1	0.94	0.0268721	0.19	0.78	0.107905	0.07	1	0	0.04	1	0
FBgn0000261	Cat	0.25	1	0	0.31	1	0	-0.12	1	0	0.2	1	0	0.39	0.51	0.29243	-0.06	1	0	-0.02	1	0	-0.25	0.95	0.0222764	-0.14	1	0	0.05	1	0	-0.16	0.93	0.0315171	0.06	1	0	-0.18	0.79	0.102373	-0.02	1	0	-0.02	1	0
FBgn0029093	cathD	-0.1	1	0	0.02	1	0	-0.11	1	0	-0.09	1	0	0.02	1	0	-0.03	1	0	-0.07	1	0	-0.02	1	0	-0.02	1	0	-0.12	0.9	0.0457575	-0.29	0.36	0.443697	-0.00571	1	0	-0.22	0.6	0.221849	-0.18	0.83	0.0809219	-0.06	1	0
FBgn0024249	cato	-4.19	1	0	0.29	1	0	-0.51	1	0	2.41	1	0	0.13	1	0	2.31	1	0	#N/A	#N/A	#N/A	#N/A	#N/A	#N/A	#N/A	#N/A	#N/A	2.21	0.96	0.0177288	-0.09	1	0	-0.03	1	0	#N/A	#N/A	#N/A	#N/A	#N/A	#N/A	#N/A	#N/A	#N/A
FBgn0002022	Catsup	-0.06	1	0	-0.01	1	0	-0.2	1	0	-0.03	1	0	-0.09	0.99	0.00436481	-0.05	1	0	-0.06	1	0	0.03	1	0	-0.02	1	0	-0.15	0.81	0.091515	-0.09	0.97	0.0132283	-0.06	1	0	-0.04	1	0	-0.1	1	0	-0.18	0.99	0.00436481
FBgn0015919	caup	-0.13	1	0	-0.17	1	0	-0.15	1	0	0.16	1	0	0.9	0.38	0.420216	-0.00122	1	0	0.2	1	0	-0.53	0.96	0.0177288	-0.65	1	0	-0.05	1	0	0.04	1	0	-0.01	1	0	-0.06	1	0	0.18	1	0	-0.02	1	0
FBgn0026257	cav	0.37	1	0	0.34	1	0	0.55	0.71	0.148742	-0.32	1	0	-0.62	0.22	0.657577	0.00911	1	0	0.07	1	0	0.24	0.96	0.0177288	0.06	1	0	0.29	0.66	0.180456	0.29	0.73	0.136677	0.29	0.67	0.173925	0.68	0.03	1.52288	0.49	0.3	0.522879	0.52	0.21	0.677781
FBgn0011571	caz	-0.24	1	0	-0.11	1	0	-0.23	1	0	0.03	1	0	0.00845	1	0	0.22	1	0	0.05	1	0	0.17	0.96	0.0177288	0.07	1	0	0.24	0.87	0.0604807	0.26	0.87	0.0604807	0.06	1	0	0.28	0.91	0.0409586	0.18	1	0	0.00353	1	0
FBgn0033842	cbc	0.13	1	0	-0.05	1	0	-0.03	1	0	-0.22	1	0	-0.27	0.81	0.091515	-0.02	1	0	0.00236	1	0	0.27	0.96	0.0177288	0.21	1	0	0.16	0.94	0.0268721	0.25	0.82	0.0861861	0.37	0.46	0.337242	0.15	0.98	0.00877392	0.15	1	0	0.02	1	0
FBgn0020224	Cbl	-0.00236	1	0	-0.00273	1	0	0.00907	1	0	-0.01	1	0	-0.12	0.91	0.0409586	0.18	1	0	-0.00377	1	0	0.13	0.96	0.0177288	-0.05	1	0	0.22	0.74	0.130768	0.07	1	0	0.1	0.96	0.0177288	0.31	0.68	0.167491	0.09	1	0	-0.08	1	0
FBgn0026144	CBP	0.02	1	0	0.06	1	0	-0.01	1	0	-0.11	1	0	-0.39	0.49	0.309804	0.22	1	0	-0.00482	1	0	0.08	0.96	0.0177288	0.02	1	0	0.05	1	0	-0.33	0.97	0.0132283	-0.28	0.97	0.0132283	3.14	0.00064	3.19382	1.72	0.28	0.552842	0.05	1	0
FBgn0022943	Cbp20	0.07	1	0	0.13	1	0	0.11	1	0	-0.18	1	0	-0.3	0.75	0.124939	0.28	1	0	-0.12	1	0	0.14	0.96	0.0177288	-0.00236	1	0	0.18	0.91	0.0409586	0.06	1	0	0.07	1	0	0.2	0.96	0.0177288	0.2	1	0	0.07	1	0
FBgn0004580	Cbp53E	-0.23	1	0	-0.13	1	0	-0.24	1	0	0.24	1	0	0.6	0.19	0.721246	-0.26	1	0	-0.07	1	0	-0.49	0.94	0.0268721	-0.18	1	0	-0.27	0.39	0.408935	0.08	0.98	0.00877392	-0.18	0.71	0.148742	-0.1	0.96	0.0177288	0.03	1	0	0.06	1	0
FBgn0022942	Cbp80	-0.13	1	0	0.00277	1	0	-0.22	1	0	-0.02	1	0	-0.07	1	0	0.14	1	0	-0.09	1	0	0.00697	1	0	0.02	1	0	-0.14	0.87	0.0604807	-0.03	1	0	-0.06	1	0	0.08	1	0	-0.14	1	0	-0.24	0.94	0.0268721
FBgn0031148	Cbs	-0.3	1	0	-0.22	1	0	-0.3	1	0	0.07	1	0	0.06	1	0	0.2	1	0	-0.09	1	0	0.08	0.98	0.00877392	0.03	1	0	-0.04	1	0	0.00129	1	0	-0.11	0.97	0.0132283	0.25	0.88	0.0555173	0.09	1	0	-0.06	1	0
FBgn0086757	cbs	0.15	1	0	0.15	1	0	-0.00283	1	0	-0.21	1	0	-0.39	0.48	0.318759	0.000339	1	0	-0.06	1	0	0.11	0.96	0.0177288	0.00819	1	0	-0.15	0.83	0.0809219	-0.04	1	0	-0.19	0.73	0.136677	0.22	0.87	0.0604807	0.000706	1	0	0.14	1	0
FBgn0043364	cbt	0.32	1	0	0.32	1	0	0.39	0.88	0.0555173	-0.02	1	0	0.38	0.5	0.30103	-0.23	1	0	-0.27	1	0	-0.3	0.95	0.0222764	-0.16	1	0	-0.13	0.86	0.0655015	-0.21	0.64	0.19382	-0.24	0.44	0.356547	-0.44	0.09	1.04576	-0.42	0.13	0.886057	-0.67	0.000775	3.1107
FBgn0011241	cbx	0.02	1	0	-0.00624	1	0	0.09	1	0	-0.17	1	0	-0.13	0.98	0.00877392	-0.1	1	0	-0.000609	1	0	0.07	1	0	0.01	1	0	-0.17	0.9	0.0457575	-0.02	1	0	-0.01	1	0	0.01	1	0	-0.07	1	0	0.08	1	0
FBgn0067317	Cby	0.39	1	0	0.26	1	0	0.84	0.76	0.119186	0.54	1	0	0.51	1	0	-0.11	1	0	2.04	1	0	1.6	0.96	0.0177288	0.16	1	0	0.22	0.95	0.0222764	-0.12	1	0	0.46	0.62	0.207608	0.24	0.99	0.00436481	0.48	0.98	0.00877392	0.42	1	0
FBgn0039007	CCAP	-0.35	1	0	-0.14	1	0	0.1	1	0	0.09	1	0	-0.04	1	0	0.11	1	0	-0.02	1	0	0.93	0.96	0.0177288	-0.59	1	0	0.41	0.71	0.148742	0.06	1	0	0.32	0.84	0.0757207	0.14	1	0	-0.08	1	0	0.14	1	0
FBgn0039396	CCAP-R	-0.59	1	0	-0.06	1	0	-0.05	1	0	1.16	1	0	0.83	0.75	0.124939	0.22	1	0	-0.47	1	0	0.01	1	0	0.08	1	0	-0.12	1	0	0.03	1	0	0.04	1	0	0.11	1	0	0.12	1	0	-0.2	1	0
FBgn0036219	CCDC151	3.13	1	0	0.13	1	0	3.65	0.94	0.0268721	0.19	1	0	-0.8	0.9	0.0457575	-2.65	1	0	-0.56	1	0	-1.52	0.96	0.0177288	-1.22	1	0	1.25	0.74	0.130768	0.77	0.96	0.0177288	1	0.86	0.0655015	-0.41	0.96	0.0177288	-0.73	0.97	0.0132283	-0.26	1	0
FBgn0261353	Ccdc56	0.06	1	0	-0.07	1	0	-0.12	1	0	-0.13	1	0	-0.04	1	0	0.00706	1	0	-0.08	1	0	0.1	0.96	0.0177288	0.04	1	0	0.00631	1	0	-0.04	1	0	-0.04	1	0	0.12	0.97	0.0132283	0.04	1	0	-0.00796	1	0
FBgn0038199	CCHa1	-0.26	1	0	-0.72	1	0	-1.33	0.4	0.39794	0.72	1	0	0.3	0.99	0.00436481	-0.31	1	0	0.06	1	0	-0.59	0.96	0.0177288	0.27	1	0	-0.1	1	0	-0.26	0.96	0.0177288	0.23	0.94	0.0268721	0.01	1	0	-0.09	1	0	0.00208	1	0
FBgn0050106	CCHa1-R	-0.68	1	0	-0.62	1	0	-0.68	0.99	0.00436481	0.39	1	0	0.64	0.81	0.091515	-0.2	1	0	0.34	1	0	-0.53	0.96	0.0177288	-0.31	1	0	-0.31	0.82	0.0861861	0.00357	1	0	-0.15	0.99	0.00436481	-0.06	1	0	0.05	1	0	-0.09	1	0
FBgn0038147	CCHa2	0.03	1	0	0.09	1	0	0.18	1	0	0.13	1	0	0.00706	1	0	-0.59	0.32	0.49485	-0.22	1	0	-0.7	0.13	0.886057	-0.54	1	0	-0.17	0.74	0.130768	-0.38	0.11	0.958607	0.04	1	0	-0.37	0.32	0.49485	-0.55	0.03	1.52288	-0.43	0.17	0.769551
FBgn0033058	CCHa2-R	0.34	1	0	-0.11	1	0	0.42	1	0	1.63	1	0	0.81	0.9	0.0457575	0.72	1	0	0.47	1	0	-0.63	0.98	0.00877392	-0.29	1	0	0.2	1	0	0.31	0.95	0.0222764	-0.11	1	0	0.5	0.91	0.0409586	0.89	0.53	0.275724	0.37	1	0
FBgn0038925	Cchl	0.1	1	0	-0.06	1	0	0.13	1	0	-0.02	1	0	-0.09	0.99	0.00436481	-0.11	1	0	-0.04	1	0	0.14	0.96	0.0177288	0.11	1	0	-0.17	0.75	0.124939	-0.07	1	0	-0.14	0.82	0.0861861	0.02	1	0	0.12	1	0	0.15	0.95	0.0222764
FBgn0259231	CCKLR-17D1	0.25	1	0	0.64	1	0	0.45	1	0	0.06	1	0	0.23	1	0	-0.71	1	0	0.15	1	0	-0.6	0.96	0.0177288	0.18	1	0	0.13	1	0	-0.04	1	0	-0.15	1	0	0.36	0.96	0.0177288	0.26	1	0	0.24	1	0
FBgn0030954	CCKLR-17D3	0.07	1	0	-0.27	1	0	-0.07	1	0	0.85	1	0	0.65	0.89	0.05061	-0.71	1	0	1.45	1	0	0.29	1	0	1.46	1	0	-0.33	0.92	0.0362122	0.24	0.97	0.0132283	0.42	0.81	0.091515	-0.3	0.96	0.0177288	0.09	1	0	-0.17	1	0
FBgn0038331	Ccm3	-0.06	1	0	-0.06	1	0	-0.08	1	0	-0.07	1	0	-0.09	0.99	0.00436481	-0.13	1	0	0.05	1	0	0.13	0.96	0.0177288	0.06	1	0	0.02	1	0	0.01	1	0	0.04	1	0	-0.02	1	0	-0.09	1	0	-0.09	1	0
FBgn0052183	Ccn	0.03	1	0	-0.14	1	0	0.01	1	0	-0.02	1	0	0.32	0.88	0.0555173	-0.39	1	0	-0.05	1	0	-0.56	0.96	0.0177288	-0.46	1	0	0.07	1	0	-0.04	1	0	-0.1	0.99	0.00436481	0.05	1	0	0.06	1	0	0.1	1	0
FBgn0004783	Ccp84Aa	-0.67	1	0	-1.49	1	0	-4.78	0.66	0.180456	#N/A	#N/A	#N/A	#N/A	#N/A	#N/A	#N/A	#N/A	#N/A	1.35	1	0	-0.14	1	0	2.24	1	0	0.33	1	0	-0.21	1	0	-3.28	0.86	0.0655015	0.6	0.96	0.0177288	-1.33	0.91	0.0409586	-5.18	0.64	0.19382
FBgn0004782	Ccp84Ab	-3	0.57	0.244125	-1.14	1	0	-1.63	0.75	0.124939	0.03	1	0	2.39	0.9	0.0457575	0.05	1	0	-0.43	1	0	-0.56	0.99	0.00436481	-1.71	1	0	0.67	1	0	0.66	1	0	-2.41	0.94	0.0268721	-0.78	0.93	0.0315171	-3.12	0.42	0.376751	-2.41	0.4	0.39794
FBgn0004781	Ccp84Ac	#N/A	#N/A	#N/A	#N/A	#N/A	#N/A	#N/A	#N/A	#N/A	-4.51	1	0	-4.4	0.71	0.148742	-4.48	1	0	-1.5	1	0	-2.46	0.94	0.0268721	-0.38	1	0	#N/A	#N/A	#N/A	#N/A	#N/A	#N/A	#N/A	#N/A	#N/A	-0.03	1	0	0.07	1	0	2.32	1	0
FBgn0004780	Ccp84Ad	-2.41	1	0	0.00687	1	0	-2.45	1	0	#N/A	#N/A	#N/A	#N/A	#N/A	#N/A	#N/A	#N/A	#N/A	0.5	1	0	-0.15	1	0	-0.69	1	0	-0.44	1	0	-0.45	1	0	-0.66	0.98	0.00877392	-0.24	1	0	-0.59	1	0	0.22	1	0
FBgn0004779	Ccp84Ae	-0.1	1	0	-2.25	1	0	-2.45	1	0	#N/A	#N/A	#N/A	#N/A	#N/A	#N/A	#N/A	#N/A	#N/A	-0.53	1	0	-2.41	0.47	0.327902	-0.81	1	0	-3.86	0.77	0.113509	-1.57	0.92	0.0362122	-0.1	1	0	#N/A	#N/A	#N/A	#N/A	#N/A	#N/A	#N/A	#N/A	#N/A
FBgn0004778	Ccp84Af	2.28	1	0	0.13	1	0	-0.06	1	0	#N/A	#N/A	#N/A	#N/A	#N/A	#N/A	#N/A	#N/A	#N/A	2.04	1	0	-0.14	1	0	1.02	1	0	-0.09	1	0	2.2	0.97	0.0132283	2.29	0.94	0.0268721	4.02	0.83	0.0809219	0.07	1	0	-0.00902	1	0
FBgn0004777	Ccp84Ag	-4.8	0.88	0.0555173	-1.49	1	0	-4.84	0.69	0.161151	0.88	1	0	2.05	0.81	0.091515	-2.33	1	0	1.38	1	0	-0.16	1	0	1.58	1	0	-0.09	1	0	2.2	0.97	0.0132283	3.14	0.87	0.0604807	-0.87	1	0	-0.68	1	0	-3.14	1	0
FBgn0010531	Ccs	0.39	1	0	0.21	1	0	0.1	1	0	0.03	1	0	-0.08	1	0	0.04	1	0	0.14	1	0	0.1	1	0	0.01	1	0	0.02	1	0	-0.05	1	0	-0.11	0.99	0.00436481	-0.00614	1	0	-0.24	1	0	-0.24	1	0
FBgn0041342	Cct1	-0.24	1	0	-0.29	1	0	-0.42	0.64	0.19382	0.13	1	0	0.18	0.84	0.0757207	0.1	1	0	0.01	1	0	-0.21	0.96	0.0177288	-0.07	1	0	0.03	1	0	-0.07	1	0	-0.05	1	0	-0.08	1	0	-0.1	1	0	-0.02	1	0
FBgn0035231	Cct2	0.72	0.64	0.19382	0.39	1	0	0.77	0.41	0.387216	0.16	1	0	0.43	0.75	0.124939	-0.21	1	0	0.47	1	0	-0.11	1	0	0.05	1	0	0.16	0.78	0.107905	0.16	0.83	0.0809219	0.28	0.34	0.468521	0.13	0.92	0.0362122	0.14	0.98	0.00877392	0.26	0.44	0.356547
FBgn0010621	Cct5	-0.16	1	0	-0.21	1	0	-0.25	1	0	0.08	1	0	-0.000376	1	0	0.2	1	0	0.1	1	0	0.15	0.96	0.0177288	0.1	1	0	-0.16	0.88	0.0555173	0.07	1	0	-0.15	0.9	0.0457575	0.37	0.76	0.119186	-0.08	1	0	-0.14	1	0
FBgn0015019	Cctgamma	-0.07	1	0	-0.1	1	0	-0.18	1	0	-0.05	1	0	-0.11	0.93	0.0315171	0.13	1	0	-0.04	1	0	0.11	0.97	0.0132283	0.11	1	0	0.04	1	0	0.08	1	0	-0.01	1	0	0.3	0.83	0.0809219	-0.09	1	0	-0.23	1	0
FBgn0031367	c-cup	1	0.44	0.356547	0.85	1	0	1.06	0.24	0.619789	1.39	1	0	0.83	0.99	0.00436481	-0.1	1	0	-3.24	1	0	-3.21	0.96	0.0177288	-3.09	1	0	0.17	0.86	0.0655015	0.19	0.86	0.0655015	0.26	0.63	0.200659	0.12	0.97	0.0132283	0.21	0.95	0.0222764	0.34	0.54	0.267606
FBgn0267592	Ccy	1.11	0.44	0.356547	0.93	1	0	1.24	0.2	0.69897	0.00574	1	0	-0.00776	1	0	-2.35	1	0	#N/A	#N/A	#N/A	#N/A	#N/A	#N/A	#N/A	#N/A	#N/A	0.34	0.46	0.337242	0.6	0.04	1.39794	0.48	0.13	0.886057	0.12	1	0	0.17	1	0	0.47	0.4	0.39794
FBgn0035470	Ccz1	0.00518	1	0	-0.2	1	0	0.18	1	0	0.19	1	0	0.06	1	0	0.03	1	0	0.11	1	0	-0.12	1	0	0.1	1	0	0.1	0.97	0.0132283	0.08	1	0	0.15	0.9	0.0457575	-0.02	1	0	-0.19	1	0	0.1	1	0
FBgn0263986	cd	0.45	1	0	-0.42	1	0	-0.78	1	0	-0.82	1	0	0.13	1	0	-0.5	1	0	0.97	1	0	0.31	1	0	0.1	1	0	-0.69	0.24	0.619789	-0.32	0.86	0.0655015	-0.71	0.23	0.638272	-0.63	0.77	0.113509	-0.51	0.94	0.0268721	-0.67	0.72	0.142668
FBgn0037533	CD98hc	-0.11	1	0	-0.22	1	0	-0.04	1	0	-0.13	1	0	-0.18	0.88	0.0555173	0.07	1	0	-0.06	1	0	0.07	1	0	0.01	1	0	-0.12	0.88	0.0555173	-0.12	0.92	0.0362122	-0.08	0.96	0.0177288	0.03	1	0	-0.09	1	0	-0.04	1	0
FBgn0052499	Cda4	-0.07	1	0	-0.06	1	0	-0.53	0.69	0.161151	-0.63	1	0	1.2	0.38	0.420216	-1.44	0.78	0.107905	-0.06	1	0	-2.03	0.06	1.22185	-0.27	1	0	-0.23	0.94	0.0268721	-0.07	1	0	-0.5	0.52	0.283997	-0.15	1	0	0.63	0.88	0.0555173	0.17	1	0
FBgn0051973	Cda5	-0.15	1	0	0.24	1	0	-0.13	1	0	-0.03	1	0	0.67	0.27	0.568636	-0.3	1	0	-0.07	1	0	-0.68	0.88	0.0555173	-0.09	1	0	-0.26	0.48	0.318759	0.1	0.96	0.0177288	-0.39	0.11	0.958607	-0.19	0.93	0.0315171	-0.08	1	0	-0.11	1	0
FBgn0034197	Cda9	-0.57	0.72	0.142668	-0.45	1	0	-0.86	0.17	0.769551	-0.01	1	0	-0.16	1	0	-0.27	1	0	-0.27	1	0	-0.48	0.96	0.0177288	-0.47	1	0	-0.07	1	0	-0.34	0.86	0.0655015	-0.18	0.97	0.0132283	-0.45	0.72	0.142668	-0.8	0.15	0.823909	-0.72	0.23	0.638272
FBgn0039774	CDase	-0.67	0.44	0.356547	-0.69	0.76	0.119186	-0.66	0.31	0.508638	0.54	1	0	0.66	0.4	0.39794	-0.22	1	0	-0.05	1	0	-0.45	0.93	0.0315171	-0.17	1	0	0.22	0.6	0.221849	0.03	1	0	0.05	1	0	-0.01	1	0	-0.13	1	0	-0.26	0.83	0.0809219
FBgn0031952	cdc14	-0.06	1	0	0.11	1	0	-0.03	1	0	0.06	1	0	0.09	0.99	0.00436481	0.06	1	0	-0.07	1	0	-0.03	1	0	-0.09	1	0	0.2	0.78	0.107905	0.05	1	0	0.1	0.97	0.0132283	0.11	0.99	0.00436481	0.23	0.92	0.0362122	0.2	0.99	0.00436481
FBgn0025781	Cdc16	-0.27	1	0	-0.05	1	0	-0.09	1	0	-0.2	1	0	-0.31	0.64	0.19382	0.08	1	0	-0.04	1	0	0.11	0.96	0.0177288	0.02	1	0	0.18	0.94	0.0268721	-0.06	1	0	-0.13	0.97	0.0132283	0.38	0.86	0.0655015	0.07	1	0	-0.06	1	0
FBgn0032863	Cdc23	-0.02	1	0	0.15	1	0	0.13	1	0	-0.23	1	0	-0.35	0.64	0.19382	0.14	1	0	-0.05	1	0	0.17	0.96	0.0177288	0.02	1	0	0.42	0.13	0.886057	0.27	0.59	0.229148	0.42	0.14	0.853872	0.3	0.78	0.107905	0.24	0.94	0.0268721	0.14	1	0
FBgn0012058	Cdc27	-0.05	1	0	0.04	1	0	0.06	1	0	-0.17	1	0	-0.22	0.81	0.091515	0.08	1	0	0.00869	1	0	0.07	0.99	0.00436481	-0.06	1	0	0.26	0.42	0.376751	0.21	0.67	0.173925	0.3	0.28	0.552842	0.31	0.26	0.585027	0.21	0.73	0.136677	0.19	0.8	0.09691
FBgn0013435	cdc2rk	-0.28	1	0	0.12	1	0	-0.29	1	0	0.06	1	0	-0.01	1	0	0.12	1	0	0.00359	1	0	-0.01	1	0	0.05	1	0	0.13	1	0	0.11	1	0	0.25	0.87	0.0604807	0.06	1	0	-0.08	1	0	-0.12	1	0
FBgn0011573	Cdc37	-0.03	1	0	-0.07	1	0	-0.11	1	0	-0.04	1	0	-0.09	0.99	0.00436481	0.04	1	0	-0.02	1	0	0.08	0.96	0.0177288	0.03	1	0	0.09	0.96	0.0177288	0.05	1	0	0.05	1	0	0.11	1	0	-0.12	1	0	-0.03	1	0
FBgn0010341	Cdc42	-0.15	1	0	-0.17	1	0	-0.23	1	0	-0.06	1	0	-0.04	1	0	0.07	1	0	-0.01	1	0	0.02	1	0	-0.03	1	0	-0.00891	1	0	-0.1	0.96	0.0177288	-0.13	0.87	0.0604807	0.1	0.96	0.0177288	-0.05	1	0	-0.12	1	0
FBgn0026143	CDC45L	-0.27	1	0	-0.25	1	0	-0.3	1	0	-0.34	1	0	-0.54	0.25	0.60206	0.1	1	0	-0.03	1	0	0.1	0.96	0.0177288	-0.01	1	0	-0.34	0.71	0.148742	-0.06	1	0	-0.01	1	0	1.43	0.1	1	0.47	1	0	0.09	1	0
FBgn0265574	Cdc5	-0.2	1	0	-0.13	1	0	-0.11	1	0	-0.15	1	0	-0.2	0.82	0.0861861	-0.03	1	0	0.02	1	0	0.09	0.96	0.0177288	-0.00561	1	0	-0.02	1	0	0.01	1	0	-0.02	1	0	0.08	1	0	-0.21	1	0	-0.27	0.88	0.0555173
FBgn0035918	Cdc6	0.01	1	0	0.07	1	0	0.11	1	0	-0.37	1	0	-0.56	0.29	0.537602	0.13	1	0	0.01	1	0	0.14	0.96	0.0177288	0.04	1	0	-0.13	1	0	-0.06	1	0	-0.3	0.96	0.0177288	2.69	0.0093	2.03152	1.04	0.84	0.0757207	-0.33	1	0
FBgn0265082	Cdep	-0.18	1	0	-0.12	1	0	-0.1	1	0	0.24	1	0	0.41	0.42	0.376751	-0.09	1	0	0.23	1	0	-0.19	0.96	0.0177288	-0.03	1	0	-0.04	1	0	-0.05	1	0	-0.13	0.93	0.0315171	-0.11	1	0	-0.09	1	0	-0.15	1	0
FBgn0032821	CdGAPr	0.02	1	0	0.08	1	0	0.09	1	0	-0.1	1	0	-0.09	0.98	0.00877392	0.0044	1	0	-0.02	1	0	-0.08	0.98	0.00877392	-0.08	1	0	0.11	0.92	0.0362122	0.09	0.97	0.0132283	0.07	0.98	0.00877392	0.02	1	0	-0.00446	1	0	-0.01	1	0
FBgn0004876	cdi	0.03	1	0	-0.07	1	0	0.13	1	0	-0.05	1	0	-0.09	0.99	0.00436481	0.01	1	0	-0.04	1	0	-0.09	0.96	0.0177288	-0.02	1	0	0.05	1	0	0.01	1	0	0.13	0.93	0.0315171	0.03	1	0	0.00486	1	0	-0.05	1	0
FBgn0004106	Cdk1	-0.04	1	0	0.04	1	0	0.06	1	0	-0.17	1	0	-0.42	0.45	0.346787	0.19	1	0	0.03	1	0	0.25	0.96	0.0177288	0.13	1	0	0.26	0.87	0.0604807	0.21	0.96	0.0177288	0.00842	1	0	1.53	0.02	1.69897	0.82	0.58	0.236572	0.34	1	0
FBgn0037093	Cdk12	-0.13	1	0	-0.06	1	0	-0.17	1	0	0.04	1	0	-0.07	1	0	0.19	1	0	0.39	0.86	0.0655015	0.18	0.96	0.0177288	0.05	1	0	0.01	1	0	0.03	1	0	-0.000301	1	0	0.24	0.84	0.0757207	0.12	1	0	0.04	1	0
FBgn0004107	Cdk2	-0.39	1	0	0.00393	1	0	-0.12	1	0	-0.43	1	0	-0.43	0.51	0.29243	0.12	1	0	-0.08	1	0	0.16	0.96	0.0177288	0.03	1	0	-0.24	0.95	0.0222764	-0.12	1	0	0.15	1	0	2.2	0.01	2	0.99	0.73	0.136677	0.19	1	0
FBgn0016131	Cdk4	-0.13	1	0	-0.09	1	0	-0.16	1	0	-0.08	1	0	-0.09	0.99	0.00436481	-0.11	1	0	-0.08	1	0	-0.08	0.98	0.00877392	-0.05	1	0	-0.09	1	0	-0.00287	1	0	-0.32	0.6	0.221849	0.37	0.91	0.0409586	0.37	0.98	0.00877392	0.08	1	0
FBgn0013762	Cdk5	-0.04	1	0	-0.02	1	0	-0.03	1	0	-0.01	1	0	-0.06	1	0	0.07	1	0	-0.00346	1	0	0.23	0.96	0.0177288	0.04	1	0	-0.000403	1	0	0.09	0.98	0.00877392	-0.00138	1	0	-0.04	1	0	-0.00605	1	0	-0.03	1	0
FBgn0027491	Cdk5alpha	-0.02	1	0	0.13	1	0	0.37	1	0	0.13	1	0	0.27	0.84	0.0757207	-0.31	1	0	0.17	1	0	-0.34	0.96	0.0177288	0.09	1	0	-0.02	1	0	-0.02	1	0	-0.21	0.81	0.091515	-0.12	0.99	0.00436481	-0.17	1	0	-0.11	1	0
FBgn0263237	Cdk7	-0.32	1	0	-0.05	1	0	-0.21	1	0	-0.08	1	0	-0.34	0.65	0.187087	0.09	1	0	-0.08	1	0	0.15	0.96	0.0177288	0.03	1	0	0.03	1	0	-0.15	0.98	0.00877392	-0.08	1	0	0.33	0.94	0.0268721	0.27	1	0	-0.12	1	0
FBgn0015618	Cdk8	0.14	1	0	0.00438	1	0	-0.00566	1	0	-0.23	1	0	-0.45	0.51	0.29243	0.09	1	0	-0.09	1	0	0.22	0.96	0.0177288	0.01	1	0	-0.01	1	0	-0.16	0.98	0.00877392	0.11	1	0	0.32	0.96	0.0177288	-0.02	1	0	0.06	1	0
FBgn0019949	Cdk9	-0.04	1	0	0.05	1	0	-0.00538	1	0	-0.16	1	0	-0.19	0.89	0.05061	0.02	1	0	-0.02	1	0	0.11	0.96	0.0177288	-0.05	1	0	0.06	1	0	-0.05	1	0	0.02	1	0	0.11	1	0	-0.01	1	0	0.03	1	0
FBgn0026141	Cdlc2	0.98	0.43	0.366532	0.78	1	0	1.26	0.1	1	0.03	1	0	2.39	0.9	0.0457575	2.31	1	0	-0.07	1	0	4.16	0.96	0.0177288	0.08	1	0	0.5	0.1	1	0.51	0.12	0.920819	0.38	0.32	0.49485	0.26	0.88	0.0555173	0.34	0.74	0.130768	0.39	0.56	0.251812
FBgn0261532	cdm	-0.16	1	0	-0.12	1	0	-0.15	1	0	-0.13	1	0	-0.17	0.86	0.0655015	0.05	1	0	-0.02	1	0	0.09	0.96	0.0177288	0.07	1	0	-0.04	1	0	0.01	1	0	0.04	1	0	-0.07	1	0	-0.15	1	0	-0.2	1	0
FBgn0010350	CdsA	-0.15	1	0	-0.02	1	0	-0.23	1	0	0.07	1	0	0.06	1	0	-0.04	1	0	0.05	1	0	0.07	1	0	0.00932	1	0	0.03	1	0	-0.04	1	0	0.00395	1	0	-0.00309	1	0	-0.01	1	0	0.00872	1	0
FBgn0000281	Cec2	#N/A	#N/A	#N/A	#N/A	#N/A	#N/A	#N/A	#N/A	#N/A	#N/A	#N/A	#N/A	#N/A	#N/A	#N/A	#N/A	#N/A	#N/A	#N/A	#N/A	#N/A	#N/A	#N/A	#N/A	#N/A	#N/A	#N/A	-2.47	0.94	0.0268721	-2.47	0.96	0.0177288	-2.41	0.94	0.0268721	-0.03	1	0	2.46	1	0	4.08	0.87	0.0604807
FBgn0000276	CecA1	-0.00588	1	0	0.39	1	0	0.86	0.79	0.102373	-2.46	1	0	0.76	0.9	0.0457575	-1.42	1	0	-0.02	1	0	-1.34	0.96	0.0177288	0.27	1	0	-0.78	0.14	0.853872	-0.82	0.14	0.853872	-0.81	0.12	0.920819	-0.08	1	0	1.38	5.97e-07	6.22403	1.11	0.000216	3.66555
FBgn0000277	CecA2	0.19	1	0	0.52	1	0	1.12	0.69	0.161151	-6.16	1	0	1.07	0.9	0.0457575	-1.59	1	0	1.2	1	0	0.42	1	0	1.02	1	0	-3.45	1.51e-06	5.82102	-3.15	1.85e-05	4.73283	-2.63	0.000707	3.15058	0.26	0.96	0.0177288	2.35	1e-10	10	2.15	7.62e-09	8.11805
FBgn0000278	CecB	-0.72	1	0	-0.03	1	0	0.85	1	0	-3.23	1	0	-0.86	0.99	0.00436481	-0.95	1	0	-1.41	1	0	-0.68	1	0	0.17	1	0	-7.25	0.25	0.60206	-7.26	0.32	0.49485	-4.83	0.1	1	1.29	0.37	0.431798	3.12	8.86e-06	5.05257	2.57	0.000887	3.05208
FBgn0000279	CecC	-3.15	0.48	0.318759	-1.29	1	0	0.79	0.99	0.00436481	-0.92	1	0	-1.79	0.83	0.0809219	-1.04	1	0	-0.28	1	0	-2.46	0.91	0.0409586	0.74	1	0	-6.17	0.00599	2.22257	-4.14	0.01	2	-4.68	0.00627	2.20273	0.33	0.97	0.0132283	1.8	0.02	1.69897	2.2	0.00114	2.9431
FBgn0000280	Cec-Psi1	#N/A	#N/A	#N/A	#N/A	#N/A	#N/A	#N/A	#N/A	#N/A	#N/A	#N/A	#N/A	#N/A	#N/A	#N/A	#N/A	#N/A	#N/A	#N/A	#N/A	#N/A	#N/A	#N/A	#N/A	#N/A	#N/A	#N/A	2.21	0.96	0.0177288	2.2	0.97	0.0132283	-0.03	1	0	-0.03	1	0	3.31	0.98	0.00877392	-0.00902	1	0
FBgn0032409	Ced-12	-4.13e-06	1	0	-0.03	1	0	-0.07	1	0	-0.14	1	0	-0.21	0.84	0.0757207	0.02	1	0	-0.16	1	0	0.13	0.96	0.0177288	-0.06	1	0	-0.00515	1	0	0.06	1	0	-0.05	1	0	0.19	0.96	0.0177288	0.04	1	0	0.05	1	0
FBgn0029092	ced-6	-0.02	1	0	0.14	1	0	0.04	1	0	-0.1	1	0	-0.11	0.99	0.00436481	-0.00787	1	0	-0.03	1	0	0.05	1	0	-0.02	1	0	-0.17	0.82	0.0861861	-0.16	0.89	0.05061	0.02	1	0	-0.13	0.92	0.0362122	-0.39	0.07	1.1549	-0.22	0.59	0.229148
FBgn0032876	Cen	-0.04	1	0	-0.02	1	0	-0.04	1	0	-0.08	1	0	-0.37	0.52	0.283997	0.12	1	0	-0.05	1	0	0.14	0.96	0.0177288	0.05	1	0	0.00602	1	0	0.08	0.99	0.00436481	0.07	0.99	0.00436481	0.37	0.66	0.180456	-0.04	1	0	-0.18	1	0
FBgn0039056	CenB1A	-0.19	1	0	-0.14	1	0	-0.00934	1	0	-0.18	1	0	-0.32	0.6	0.221849	0.04	1	0	-0.09	1	0	0.02	1	0	-0.05	1	0	-0.14	0.94	0.0268721	-0.17	0.88	0.0555173	-0.07	1	0	0.2	0.93	0.0315171	-0.13	1	0	-0.07	1	0
FBgn0028509	CenG1A	-0.06	1	0	-0.14	1	0	-0.13	1	0	-0.04	1	0	0.21	0.84	0.0757207	-0.09	1	0	-0.05	1	0	-0.17	0.96	0.0177288	-0.17	1	0	-0.13	0.86	0.0655015	0.08	0.98	0.00877392	-0.22	0.53	0.275724	0.04	1	0	0.2	0.78	0.107905	0.19	0.77	0.113509
FBgn0266916	Cenp-C	0.03	1	0	0.23	1	0	0.08	1	0	-0.25	1	0	-0.48	0.36	0.443697	0.08	1	0	-0.08	1	0	0.09	0.99	0.00436481	-0.01	1	0	0.09	1	0	0.15	0.93	0.0315171	-0.08	1	0	1.11	0.09	1.04576	0.3	1	0	0.04	1	0
FBgn0036480	Cep135	0.00161	1	0	0.01	1	0	0.11	1	0	-0.23	1	0	-0.35	0.55	0.259637	0.09	1	0	-0.06	1	0	-0.00888	1	0	-0.04	1	0	0.12	0.92	0.0362122	0.18	0.79	0.102373	0.19	0.73	0.136677	0.27	0.81	0.091515	0.13	1	0	0.22	0.97	0.0132283
FBgn0266708	Cep89	1.06	0.71	0.148742	0.78	1	0	1.09	0.51	0.29243	0.56	1	0	0.27	1	0	-0.51	1	0	0.5	1	0	0.37	1	0	-0.69	1	0	0.22	0.91	0.0409586	0.34	0.77	0.113509	0.08	1	0	0.21	0.98	0.00877392	0.27	1	0	0.45	0.9	0.0457575
FBgn0031575	Cep97	0.36	1	0	0.23	1	0	0.44	0.83	0.0809219	-0.19	1	0	-0.31	0.67	0.173925	0.07	1	0	0.03	1	0	0.2	0.96	0.0177288	0.02	1	0	0.25	0.64	0.19382	0.24	0.73	0.136677	0.2	0.77	0.113509	0.16	0.86	0.0655015	0.12	1	0	0.19	0.79	0.102373
FBgn0034443	cer	0.16	1	0	0.1	1	0	0.39	0.99	0.00436481	0.05	1	0	-0.04	1	0	-0.2	1	0	-0.02	1	0	-0.000454	1	0	0.12	1	0	-0.1	0.99	0.00436481	0.07	1	0	0.02	1	0	-0.3	0.76	0.119186	-0.3	0.79	0.102373	-0.13	1	0
FBgn0037315	Cerk	0.28	1	0	0.11	1	0	0.25	1	0	-0.12	1	0	-0.13	0.9	0.0457575	-0.05	1	0	0.01	1	0	0.00466	1	0	0.07	1	0	-0.1	0.94	0.0268721	-0.29	0.39	0.408935	-0.11	0.92	0.0362122	-0.17	0.83	0.0809219	-0.39	0.08	1.09691	-0.25	0.51	0.29243
FBgn0027569	cert	0.02	1	0	0.00557	1	0	0.03	1	0	-0.1	1	0	-0.14	0.9	0.0457575	-0.03	1	0	0.03	1	0	0.06	1	0	0.05	1	0	-0.23	0.72	0.142668	-0.19	0.86	0.0655015	-0.23	0.72	0.142668	-0.18	0.96	0.0177288	-0.09	1	0	0.02	1	0
FBgn0030657	cerv	0.17	1	0	0.13	1	0	0.03	1	0	-0.07	1	0	-0.36	0.71	0.148742	0.05	1	0	-0.11	1	0	0.02	1	0	-0.2	1	0	0.11	1	0	0.3	0.83	0.0809219	-0.09	1	0	0.21	0.97	0.0132283	-0.06	1	0	-0.14	1	0
FBgn0000286	Cf2	-0.21	1	0	-0.05	1	0	-0.19	1	0	-0.18	1	0	-0.13	0.9	0.0457575	-0.03	1	0	0.01	1	0	0.15	0.96	0.0177288	-0.03	1	0	-0.07	0.99	0.00436481	-0.15	0.87	0.0604807	-0.12	0.91	0.0409586	-0.03	1	0	0.01	1	0	-0.19	1	0
FBgn0030121	Cfp1	-0.11	1	0	0.02	1	0	0.03	1	0	-0.27	1	0	-0.43	0.43	0.366532	0.03	1	0	0.00821	1	0	0.23	0.87	0.0604807	0.05	1	0	0.03	1	0	-0.04	1	0	0.01	1	0	0.41	0.56	0.251812	0.05	1	0	-0.06	1	0
FBgn0000289	cg	-0.24	1	0	-0.15	1	0	-0.18	1	0	-0.04	1	0	-0.06	1	0	0.09	1	0	-0.06	1	0	0.08	0.98	0.00877392	0.00693	1	0	0.01	1	0	0.04	1	0	-0.07	0.99	0.00436481	0.17	0.85	0.0705811	0.02	1	0	-0.09	1	0
FBgn0039596	CG10000	-1.27	1	0	-0.35	1	0	-3.02	0.44	0.356547	0.55	1	0	0.95	0.75	0.124939	-0.85	1	0	0.97	1	0	0.49	0.96	0.0177288	0.18	1	0	0.22	1	0	-0.3	0.97	0.0132283	-0.4	0.9	0.0457575	0.31	0.96	0.0177288	-0.02	1	0	0.41	1	0
FBgn0037972	CG10005	-0.04	1	0	-0.00418	1	0	0.18	1	0	-0.69	1	0	-0.27	1	0	-0.46	1	0	-0.08	1	0	-0.27	1	0	-0.03	1	0	0.18	1	0	-0.2	1	0	-0.11	1	0	1.21	0.56	0.251812	0.94	0.86	0.0655015	0.7	1	0
FBgn0039590	CG10011	-0.06	1	0	-0.06	1	0	0.06	1	0	0.06	1	0	0.13	0.9	0.0457575	0.07	1	0	0.05	1	0	-0.02	1	0	-0.06	1	0	0.02	1	0	-0.00735	1	0	-0.04	1	0	-0.03	1	0	0.02	1	0	-0.08	1	0
FBgn0038012	CG10013	0.57	1	0	0.39	1	0	0.52	1	0	-0.16	1	0	-1.16	0.84	0.0757207	-0.94	1	0	0.48	1	0	0.48	0.96	0.0177288	-3.35	1	0	0.42	0.64	0.19382	0.37	0.78	0.107905	0.53	0.41	0.387216	0.06	1	0	0.06	1	0	0.08	1	0
FBgn0038000	CG10014	0.88	0.5	0.30103	0.59	1	0	0.94	0.28	0.552842	-1.37	1	0	0.67	1	0	0.26	1	0	1.35	1	0	-0.14	1	0	-2.24	1	0	0.38	0.25	0.60206	0.25	0.68	0.167491	0.48	0.08	1.09691	0.17	0.96	0.0177288	0.24	0.92	0.0362122	0.29	0.76	0.119186
FBgn0031568	CG10019	-0.05	1	0	-0.19	1	0	0.1	1	0	0.62	1	0	0.78	0.53	0.275724	0.29	1	0	0.06	1	0	-0.57	0.96	0.0177288	-0.3	1	0	0.47	0.46	0.337242	-0.00549	1	0	0.25	0.87	0.0604807	0.01	1	0	-0.00212	1	0	-0.2	1	0
FBgn0032785	CG10026	-0.48	1	0	0.00385	1	0	-0.58	0.71	0.148742	0.52	1	0	0.35	0.84	0.0757207	-0.26	1	0	0.31	1	0	-0.41	0.96	0.0177288	0.01	1	0	0.09	0.98	0.00877392	-0.13	0.94	0.0268721	0.04	1	0	-0.37	0.74	0.130768	-0.48	0.53	0.275724	-0.38	0.72	0.142668
FBgn0037498	CG10029	-0.03	1	0	2.39	1	0	2.27	1	0	3.26	1	0	0.13	1	0	2.31	1	0	-0.07	1	0	2.18	0.96	0.0177288	0.08	1	0	-0.05	1	0	-0.14	0.92	0.0362122	-0.06	1	0	-0.27	0.82	0.0861861	-0.26	0.91	0.0409586	0.00759	1	0
FBgn0031563	CG10031	0.03	1	0	0.54	1	0	0.13	1	0	0.05	1	0	0.32	0.75	0.124939	-0.31	1	0	-0.17	1	0	-0.47	0.94	0.0268721	-0.36	1	0	0.05	1	0	-0.04	1	0	-0.05	1	0	-0.4	0.37	0.431798	-0.3	0.71	0.148742	0.02	1	0
FBgn0037493	CG10032	#N/A	#N/A	#N/A	#N/A	#N/A	#N/A	#N/A	#N/A	#N/A	#N/A	#N/A	#N/A	#N/A	#N/A	#N/A	#N/A	#N/A	#N/A	#N/A	#N/A	#N/A	#N/A	#N/A	#N/A	#N/A	#N/A	#N/A	-0.09	1	0	3.05	0.91	0.0409586	2.29	0.94	0.0268721	-0.56	1	0	-3.59	0.97	0.0132283	-1.34	1	0
FBgn0038028	CG10035	-0.03	1	0	2.39	1	0	-0.06	1	0	0.79	1	0	1.68	0.00666	2.17653	0.56	1	0	-0.32	1	0	-1.19	0.96	0.0177288	-0.12	1	0	-1.1	0.94	0.0268721	-1.11	0.96	0.0177288	0.2	1	0	0.22	1	0	1.28	0.84	0.0757207	0.29	1	0
FBgn0038013	CG10038	0.04	1	0	-0.07	1	0	0.11	1	0	-0.02	1	0	-0.07	1	0	0.19	1	0	0.13	1	0	0.13	0.97	0.0132283	0.14	1	0	-0.17	0.94	0.0268721	-0.07	1	0	0.02	1	0	0.04	1	0	-0.11	1	0	0.03	1	0
FBgn0038014	CG10041	-4.19	1	0	1.23	1	0	0.84	1	0	0.93	1	0	0.89	0.92	0.0362122	1.92	1	0	-0.42	1	0	-0.54	1	0	-1.6	1	0	0.39	0.3	0.522879	0.05	1	0	0.36	0.38	0.420216	-0.61	0.57	0.244125	-0.33	1	0	-0.31	1	0
FBgn0037492	CG10050	-0.21	1	0	-0.05	1	0	0.00517	1	0	0.01	1	0	-0.35	0.68	0.167491	0.08	1	0	0.07	1	0	0.2	0.96	0.0177288	0.06	1	0	0.06	1	0	0.26	0.96	0.0177288	0.36	0.87	0.0604807	0.45	0.93	0.0315171	-0.18	1	0	0.06	1	0
FBgn0034437	CG10051	-1.02	0.4	0.39794	-0.82	1	0	-1.85	0.00247	2.6073	1.09	0.4	0.39794	1.07	0.26	0.585027	0.69	1	0	-0.41	1	0	-0.52	0.96	0.0177288	0.58	1	0	1.14	0.07	1.1549	0.76	0.5	0.30103	0.45	0.81	0.091515	0.28	0.98	0.00877392	-0.29	1	0	0.04	1	0
FBgn0037490	CG10053	0.76	0.64	0.19382	0.27	1	0	0.56	0.8	0.09691	0.00242	1	0	0.24	0.91	0.0409586	0.19	1	0	0.13	1	0	0.2	0.99	0.00436481	0.07	1	0	0.14	0.97	0.0132283	0.21	0.93	0.0315171	0.16	0.95	0.0222764	0.25	0.96	0.0177288	0.21	1	0	0.26	1	0
FBgn0037482	CG10055	0.29	1	0	0.15	1	0	0.32	0.89	0.05061	-0.12	1	0	-0.33	0.6	0.221849	0.06	1	0	-0.03	1	0	0.22	0.9	0.0457575	0.1	1	0	0.23	0.54	0.267606	0.23	0.6	0.221849	0.25	0.43	0.366532	0.36	0.13	0.886057	0.24	0.59	0.229148	0.22	0.64	0.19382
FBgn0034439	CG10062	-0.51	0.89	0.05061	-0.38	1	0	-0.38	0.95	0.0222764	0.8	0.62	0.207608	0.56	0.6	0.221849	-0.05	1	0	-0.05	1	0	-0.38	0.96	0.0177288	0.23	1	0	0.21	0.83	0.0809219	0.13	0.97	0.0132283	0.08	1	0	0.1	1	0	0.26	0.97	0.0132283	0.36	0.74	0.130768
FBgn0035727	CG10063	0.59	0.93	0.0315171	0.55	1	0	0.6	0.72	0.142668	0.00501	1	0	0.71	0.9	0.0457575	0.25	1	0	-1.07	1	0	-0.6	0.96	0.0177288	-1.15	1	0	0.34	0.49	0.309804	0.13	0.97	0.0132283	0.47	0.18	0.744727	0.16	0.96	0.0177288	0.27	0.83	0.0809219	0.31	0.67	0.173925
FBgn0035724	CG10064	1.07	0.34	0.468521	0.56	1	0	1.13	0.16	0.79588	0.26	1	0	0.09	1	0	-0.64	1	0	1.66	1	0	-0.15	1	0	1.65	1	0	0.27	0.39	0.408935	0.21	0.68	0.167491	0.37	0.11	0.958607	0.29	0.36	0.443697	0.31	0.29	0.537602	0.4	0.06	1.22185
FBgn0037473	CG10068	0.07	1	0	-0.02	1	0	-0.21	1	0	0.00726	1	0	-0.14	0.92	0.0362122	0.07	1	0	-0.06	1	0	0.13	0.96	0.0177288	-0.05	1	0	-0.17	0.89	0.05061	-0.08	1	0	-0.21	0.81	0.091515	-0.00318	1	0	-0.02	1	0	-0.18	1	0
FBgn0034440	CG10073	-1.83	0.72	0.142668	0.18	1	0	-4.23	0.00514	2.28904	-0.42	1	0	0.45	0.9	0.0457575	-0.25	1	0	-0.39	1	0	-0.72	0.96	0.0177288	-1.74	1	0	-0.46	0.89	0.05061	-0.34	0.97	0.0132283	-0.31	0.96	0.0177288	-0.3	0.97	0.0132283	-0.26	1	0	-0.31	1	0
FBgn0035722	CG10075	-0.32	1	0	-0.24	1	0	-0.3	1	0	0.01	1	0	-0.01	1	0	-0.08	1	0	0.1	1	0	0.34	0.78	0.107905	0.23	1	0	-0.25	0.72	0.142668	-0.1	1	0	-0.09	1	0	-0.02	1	0	0.04	1	0	-0.07	1	0
FBgn0035720	CG10077	-0.03	1	0	0.12	1	0	-0.02	1	0	0.06	1	0	0.15	0.9	0.0457575	0.11	1	0	-0.05	1	0	-0.07	1	0	-0.06	1	0	0.04	1	0	0.09	1	0	-0.05	1	0	-0.02	1	0	-0.00207	1	0	-0.04	1	0
FBgn0034441	CG10081	-5.72	3.63e-06	5.44009	-1.72	1	0	-5.73	1.69e-06	5.77211	#N/A	#N/A	#N/A	#N/A	#N/A	#N/A	#N/A	#N/A	#N/A	-3.77	1	0	-3.74	0.96	0.0177288	-3.62	1	0	2.21	0.96	0.0177288	-0.09	1	0	-0.03	1	0	0.89	0.96	0.0177288	-3.07	1	0	-0.81	1	0
FBgn0034644	CG10082	0.03	1	0	0.05	1	0	0.00321	1	0	0.0051	1	0	0.17	0.89	0.05061	-0.07	1	0	0.03	1	0	-0.08	1	0	-0.04	1	0	-0.15	0.79	0.102373	-0.16	0.81	0.091515	-0.17	0.74	0.130768	-0.12	1	0	-0.3	0.87	0.0604807	-0.28	0.91	0.0409586
FBgn0037517	CG10086	-0.34	1	0	-0.21	1	0	-0.51	0.94	0.0268721	0.33	1	0	0.44	0.65	0.187087	-0.11	1	0	0.08	1	0	-0.33	0.96	0.0177288	-0.07	1	0	0.41	0.27	0.568636	0.11	0.98	0.00877392	0.17	0.89	0.05061	0.1	1	0	0.03	1	0	0.11	1	0
FBgn0036369	CG10089	0.64	0.77	0.113509	0.43	1	0	0.87	0.27	0.568636	0.32	1	0	0.00653	1	0	0.41	1	0	-0.02	1	0	-0.47	0.96	0.0177288	0.02	1	0	0.1	0.96	0.0177288	0.15	0.89	0.05061	0.19	0.74	0.130768	0.07	1	0	0.22	0.67	0.173925	0.3	0.3	0.522879
FBgn0037526	CG10092	-0.15	1	0	-0.00932	1	0	0.03	1	0	-0.17	1	0	-0.26	0.78	0.107905	-0.07	1	0	-0.04	1	0	0.18	0.96	0.0177288	0.13	1	0	0.02	1	0	-0.0036	1	0	0.02	1	0	0.18	0.99	0.00436481	-0.03	1	0	-0.18	1	0
FBgn0038032	CG10096	-0.54	1	0	-0.39	1	0	-1.91	0.22	0.657577	0.19	1	0	0.29	0.84	0.0757207	-0.2	1	0	0.05	1	0	-0.47	0.96	0.0177288	-0.44	1	0	-0.16	0.84	0.0757207	-0.26	0.64	0.19382	-0.16	0.85	0.0705811	-0.27	0.4	0.39794	-0.16	0.91	0.0409586	-0.17	0.86	0.0655015
FBgn0038033	CG10097	-0.4	1	0	-0.31	1	0	-0.99	0.7	0.154902	0.17	1	0	0.24	0.8	0.09691	-0.32	1	0	-0.0038	1	0	-0.32	0.96	0.0177288	-0.27	1	0	-0.06	1	0	-0.23	0.79	0.102373	0.11	0.96	0.0177288	-0.26	0.62	0.207608	-0.25	0.7	0.154902	-0.38	0.2	0.69897
FBgn0037472	CG10098	0.21	1	0	0.03	1	0	0.13	1	0	-0.2	1	0	-0.45	0.39	0.408935	0.06	1	0	-0.02	1	0	0.25	0.94	0.0268721	0.13	1	0	-0.11	0.96	0.0177288	-0.27	0.58	0.236572	-0.27	0.47	0.327902	-0.00241	1	0	-0.01	1	0	0.03	1	0
FBgn0035715	CG10103	-0.2	1	0	-0.05	1	0	-0.08	1	0	-0.06	1	0	-0.12	0.92	0.0362122	-0.15	1	0	-0.03	1	0	-0.17	0.96	0.0177288	-0.08	1	0	-0.09	0.96	0.0177288	-0.2	0.72	0.142668	-0.16	0.81	0.091515	-0.08	0.99	0.00436481	-0.27	0.48	0.318759	-0.02	1	0
FBgn0033933	CG10104	0.92	0.96	0.0177288	0.89	1	0	0.92	0.77	0.113509	#N/A	#N/A	#N/A	#N/A	#N/A	#N/A	#N/A	#N/A	#N/A	#N/A	#N/A	#N/A	#N/A	#N/A	#N/A	#N/A	#N/A	#N/A	-0.11	1	0	-0.13	1	0	0.03	1	0	0.33	0.96	0.0177288	0.44	0.97	0.0132283	0.58	0.78	0.107905
FBgn0036367	CG10116	-0.08	1	0	-0.1	1	0	-0.48	1	0	0.42	1	0	0.57	0.47	0.327902	-0.21	1	0	-0.07	1	0	-0.49	0.86	0.0655015	-0.03	1	0	0.37	0.28	0.552842	0.34	0.46	0.337242	0.18	0.84	0.0757207	0.18	0.96	0.0177288	-0.21	1	0	-0.03	1	0
FBgn0038088	CG10126	0.35	1	0	0.25	1	0	-0.03	1	0	0.21	1	0	0.38	0.69	0.161151	-0.1	1	0	0.00482	1	0	-0.39	0.96	0.0177288	-0.14	1	0	0.05	1	0	0.1	0.97	0.0132283	0.19	0.69	0.161151	0.05	1	0	0.00382	1	0	0.2	0.74	0.130768
FBgn0033949	CG10131	-0.2	1	0	-0.49	1	0	-0.41	0.78	0.107905	0.00662	1	0	0.41	0.9	0.0457575	-0.27	1	0	-0.92	1	0	-0.78	0.96	0.0177288	-0.17	1	0	-0.53	0.63	0.200659	-0.32	0.92	0.0362122	-0.2	0.97	0.0132283	-0.79	0.58	0.236572	-0.37	1	0	-0.18	1	0
FBgn0032798	CG10132	-0.41	1	0	-0.41	1	0	-0.38	0.99	0.00436481	-0.25	1	0	0.27	0.85	0.0705811	-0.55	1	0	0.13	1	0	-0.5	0.96	0.0177288	-0.25	1	0	-0.11	0.97	0.0132283	-0.04	1	0	-0.16	0.9	0.0457575	-0.14	0.96	0.0177288	0.29	0.8	0.09691	-0.03	1	0
FBgn0036366	CG10133	0.06	1	0	-0.18	1	0	-0.29	1	0	-0.2	1	0	-0.19	0.9	0.0457575	0.12	1	0	-0.02	1	0	0.3	0.96	0.0177288	0.12	1	0	-0.02	1	0	-0.2	0.96	0.0177288	-0.2	0.94	0.0268721	0.17	1	0	0.02	1	0	-0.19	1	0
FBgn0032800	CG10137	0.36	1	0	0.38	1	0	0.35	1	0	0.47	1	0	0.44	0.74	0.130768	0.12	1	0	0.17	1	0	-0.29	0.96	0.0177288	-0.00486	1	0	-0.18	0.92	0.0362122	-0.18	0.93	0.0315171	-0.08	1	0	-0.11	0.99	0.00436481	-0.11	1	0	-0.18	1	0
FBgn0033951	CG10139	-0.14	1	0	-0.02	1	0	0.16	1	0	-0.31	1	0	-0.32	0.75	0.124939	-0.07	1	0	0.12	1	0	0.26	0.96	0.0177288	0.08	1	0	-0.03	1	0	0.27	0.69	0.161151	0.16	0.89	0.05061	0.44	0.79	0.102373	0.08	1	0	-0.01	1	0
FBgn0036363	CG10140	-0.46	1	0	-0.5	1	0	-0.32	1	0	-1.11	1	0	0.14	1	0	-0.14	1	0	0.54	1	0	-1.1	0.96	0.0177288	-0.08	1	0	-2.37	0.18	0.744727	0.19	1	0	-2.67	0.15	0.823909	1.1	0.74	0.130768	0.81	0.98	0.00877392	1.37	0.51	0.29243
FBgn0035704	CG10144	-0.13	1	0	-0.11	1	0	-0.26	1	0	-0.02	1	0	-0.1	0.96	0.0177288	0.1	1	0	-0.02	1	0	0.06	1	0	0.00466	1	0	0.00338	1	0	0.06	1	0	0.08	0.97	0.0132283	0.11	0.99	0.00436481	0.11	1	0	0.13	1	0
FBgn0035702	CG10147	-0.22	1	0	0.07	1	0	0.01	1	0	-0.2	1	0	-0.31	0.75	0.124939	0.04	1	0	-0.09	1	0	0.06	1	0	-0.17	1	0	-0.11	0.99	0.00436481	-0.07	1	0	-0.19	0.88	0.0555173	0.2	0.97	0.0132283	0.11	1	0	-0.0079	1	0
FBgn0033960	CG10151	-0.02	1	0	0.28	1	0	0.19	1	0	-0.29	1	0	0.19	1	0	-0.77	1	0	-0.31	1	0	-0.67	0.96	0.0177288	-0.54	1	0	0.05	1	0	-0.09	1	0	-0.17	0.96	0.0177288	-0.04	1	0	-0.07	1	0	0.04	1	0
FBgn0036361	CG10154	-2.08	0.09	1.04576	-1.89	0.22	0.657577	-3.33	4.53e-05	4.3439	-1.27	1	0	-0.23	1	0	-0.88	1	0	-0.04	1	0	0.69	1	0	0.16	1	0	-2.47	0.94	0.0268721	1.19	0.96	0.0177288	-2.41	0.94	0.0268721	3.64	0.88	0.0555173	2.45	1	0	-0.00902	1	0
FBgn0035697	CG10163	-0.03	1	0	0.13	1	0	2.27	1	0	-1.39	0.07	1.1549	-0.49	0.8	0.09691	0.81	1	0	-0.24	1	0	0.6	0.8	0.09691	0.15	1	0	-0.19	1	0	-0.65	0.91	0.0409586	-0.56	0.92	0.0362122	2.83	0.00813	2.08991	0.06	1	0	-0.59	1	0
FBgn0039088	CG10164	0.9	0.31	0.508638	0.55	1	0	0.9	0.18	0.744727	3.26	1	0	3.76	0.81	0.091515	3.67	1	0	-2.39	1	0	-0.14	1	0	-2.24	1	0	0.3	0.48	0.318759	0.33	0.45	0.346787	0.36	0.3	0.522879	0.28	0.39	0.408935	0.34	0.2	0.69897	0.39	0.07	1.1549
FBgn0032801	CG10165	-0.55	1	0	-0.85	1	0	-0.93	0.38	0.420216	0.29	1	0	0.29	0.79	0.102373	0.12	1	0	0.05	1	0	-0.01	1	0	0.05	1	0	0.25	0.58	0.236572	0.17	0.85	0.0705811	-0.02	1	0	0.05	1	0	-0.02	1	0	-0.05	1	0
FBgn0032799	CG10166	-0.18	1	0	-0.18	1	0	-0.16	1	0	-0.05	1	0	-0.13	0.93	0.0315171	0.06	1	0	-0.01	1	0	0.16	0.96	0.0177288	0.06	1	0	0.07	1	0	0.16	0.96	0.0177288	0.13	0.96	0.0177288	0.15	0.96	0.0177288	-0.09	1	0	-0.08	1	0
FBgn0039087	CG10168	-0.89	0.83	0.0809219	-0.79	1	0	-1.06	0.47	0.327902	0.49	1	0	0.52	0.8	0.09691	-0.07	1	0	0.11	1	0	-0.65	0.96	0.0177288	-0.12	1	0	0.07	1	0	0.17	0.98	0.00877392	-0.03	1	0	0.25	0.97	0.0132283	0.06	1	0	0.23	1	0
FBgn0039085	CG10170	-0.16	1	0	-0.1	1	0	-0.31	1	0	0.37	1	0	0.37	0.61	0.21467	-0.21	1	0	0.03	1	0	-0.53	0.66	0.180456	-0.17	1	0	0.32	0.24	0.619789	0.09	0.97	0.0132283	0.04	1	0	0.01	1	0	-0.25	0.89	0.05061	-0.25	0.87	0.0604807
FBgn0036353	CG10171	0.25	1	0	0.37	1	0	0.22	1	0	-0.00403	1	0	-0.3	0.75	0.124939	0.03	1	0	0.04	1	0	0.27	0.96	0.0177288	0.12	1	0	0.15	0.83	0.0809219	0.05	1	0	0.29	0.36	0.443697	0.05	1	0	0.1	1	0	0.24	0.89	0.05061
FBgn0039084	CG10175	-0.03	1	0	0.26	1	0	-0.08	1	0	0.27	1	0	0.4	0.74	0.130768	0.2	1	0	0.15	1	0	-0.25	0.98	0.00877392	-0.29	1	0	0.44	0.06	1.22185	0.44	0.08	1.09691	0.32	0.28	0.552842	-0.1	1	0	-0.06	1	0	-0.14	1	0
FBgn0032682	CG10176	-0.2	1	0	-0.07	1	0	-0.07	1	0	0.29	1	0	0.61	0.47	0.327902	-0.06	1	0	0.00399	1	0	-0.23	0.97	0.0132283	-0.15	1	0	-0.12	0.94	0.0268721	0.09	0.97	0.0132283	-0.13	0.92	0.0362122	-0.01	1	0	-0.06	1	0	-0.02	1	0
FBgn0039083	CG10177	1.04	0.31	0.508638	0.66	1	0	1.1	0.14	0.853872	4.18	1	0	3.23	0.84	0.0757207	2.31	1	0	-0.07	1	0	-0.04	1	0	2.48	1	0	0.16	0.85	0.0705811	0.1	0.97	0.0132283	0.23	0.67	0.173925	0.33	0.76	0.119186	0.35	0.77	0.113509	0.41	0.57	0.244125
FBgn0032684	CG10178	0.38	1	0	0.15	1	0	0.3	1	0	0.46	0.81	0.091515	0.81	0.01	2	-0.21	1	0	0.38	1	0	0.35	0.92	0.0362122	0.43	1	0	0.34	0.16	0.79588	0.52	0.00566	2.24718	0.31	0.24	0.619789	0.16	0.96	0.0177288	0.18	1	0	0.19	1	0
FBgn0039091	CG10182	-0.09	1	0	0.12	1	0	-0.69	0.43	0.366532	0.96	0.38	0.420216	0.51	0.71	0.148742	1.04	0.27	0.568636	0.37	1	0	-0.98	0.62	0.207608	0.04	1	0	-0.37	0.96	0.0177288	-0.58	0.9	0.0457575	0.05	1	0	0.7	0.61	0.21467	0.47	0.95	0.0222764	1.55	0.00549	2.26043
FBgn0039093	CG10183	-1.21	1	0	-3.18	0.92	0.0362122	-5.63	0.47	0.327902	3.79	1	0	2.39	0.9	0.0457575	0.05	1	0	-0.03	1	0	-0.15	1	0	0.17	1	0	#N/A	#N/A	#N/A	#N/A	#N/A	#N/A	#N/A	#N/A	#N/A	1.19	0.93	0.0315171	1.1	1	0	2.89	0.18	0.744727
FBgn0039094	CG10184	0.31	1	0	0.39	1	0	-0.39	1	0	0.28	1	0	0.32	0.72	0.142668	0.09	1	0	0.05	1	0	0.09	1	0	0.16	1	0	-0.25	0.73	0.136677	-0.33	0.59	0.229148	-0.14	0.94	0.0268721	-0.03	1	0	0.07	1	0	0.06	1	0
FBgn0038397	CG10185	1.5	0.7	0.154902	0.17	1	0	0.85	1	0	0.52	1	0	0.73	0.45	0.346787	-0.15	1	0	0.34	1	0	-0.25	1	0	-0.08	1	0	-0.09	1	0	-0.19	0.92	0.0362122	0.00122	1	0	0.08	1	0	-0.05	1	0	-0.02	1	0
FBgn0032797	CG10186	-0.13	1	0	-0.13	1	0	-0.29	1	0	0.3	1	0	0.56	0.25	0.60206	-0.15	1	0	0.14	1	0	-0.34	0.96	0.0177288	-0.13	1	0	0.11	0.92	0.0362122	-0.02	1	0	0.01	1	0	-0.1	0.99	0.00436481	-0.1	1	0	-0.12	1	0
FBgn0032796	CG10188	-0.06	1	0	0.03	1	0	0.00193	1	0	-0.14	1	0	-0.24	0.7	0.154902	0.11	1	0	-0.06	1	0	0.12	0.96	0.0177288	0.02	1	0	-0.06	1	0	-0.09	0.97	0.0132283	-0.02	1	0	0.22	0.9	0.0457575	0.05	1	0	-0.07	1	0
FBgn0032793	CG10189	-0.06	1	0	-0.09	1	0	-0.07	1	0	-0.13	1	0	-0.05	1	0	-0.25	1	0	-0.21	1	0	-0.42	0.96	0.0177288	-0.12	1	0	-0.61	0.05	1.30103	-0.46	0.28	0.552842	-0.45	0.25	0.60206	-0.34	0.89	0.05061	-0.22	1	0	-0.24	1	0
FBgn0032790	CG10194	0.08	1	0	0.04	1	0	0.05	1	0	-0.02	1	0	0.03	1	0	-0.0078	1	0	0.12	1	0	-0.00959	1	0	-0.01	1	0	-0.07	1	0	-0.09	1	0	0.02	1	0	0.04	1	0	0.000366	1	0	-0.09	1	0
FBgn0032787	CG10195	0.07	1	0	0.000657	1	0	-0.1	1	0	0.09	1	0	0.05	1	0	0.12	1	0	0.05	1	0	0.07	1	0	0.12	1	0	-0.19	0.91	0.0409586	0.13	0.98	0.00877392	0.19	0.9	0.0457575	-0.21	0.96	0.0177288	-0.3	0.99	0.00436481	-0.32	0.98	0.00877392
FBgn0033969	CG10202	1.14	0.3	0.522879	0.62	1	0	1.02	0.25	0.60206	0.86	1	0	1.36	0.9	0.0457575	0.74	1	0	-2.39	1	0	0.69	1	0	-2.24	1	0	0.23	0.75	0.124939	0.32	0.59	0.229148	0.26	0.67	0.173925	0.21	0.9	0.0457575	0.35	0.59	0.229148	0.4	0.4	0.39794
FBgn0033970	CG10205	0.28	1	0	-0.49	1	0	-0.34	1	0	-0.05	1	0	0.26	0.92	0.0362122	-0.24	1	0	-0.3	1	0	-0.64	0.96	0.0177288	-0.27	1	0	-0.16	0.96	0.0177288	0.06	1	0	-0.17	0.94	0.0268721	0.29	0.93	0.0315171	0.04	1	0	0.47	0.7	0.154902
FBgn0039118	CG10208	-0.02	1	0	-0.37	1	0	-0.21	1	0	0.29	1	0	0.15	0.95	0.0222764	0.03	1	0	-0.13	1	0	-0.4	0.96	0.0177288	0.07	1	0	-0.01	1	0	-0.08	1	0	-0.02	1	0	-0.05	1	0	-0.12	1	0	0.02	1	0
FBgn0033971	CG10209	0.21	1	0	-0.1	1	0	0.31	1	0	-0.01	1	0	0.01	1	0	0.17	1	0	0.11	1	0	0.16	0.96	0.0177288	0.1	1	0	0.07	1	0	-0.0088	1	0	0.12	0.95	0.0222764	0.26	0.96	0.0177288	0.02	1	0	-0.03	1	0
FBgn0032685	CG10211	0.09	1	0	0.07	1	0	-0.69	0.35	0.455932	0.03	1	0	0.71	0.25	0.60206	-0.47	1	0	0.15	1	0	-0.54	0.95	0.0222764	0.01	1	0	-0.35	0.37	0.431798	0.11	0.97	0.0132283	-0.19	0.81	0.091515	-0.01	1	0	-0.17	1	0	0.12	1	0
FBgn0039115	CG10214	-0.13	1	0	-0.03	1	0	-4.39e-05	1	0	-0.01	1	0	-0.27	0.73	0.136677	-0.06	1	0	0.02	1	0	0.18	0.96	0.0177288	0.11	1	0	-0.04	1	0	0.19	0.92	0.0362122	0.07	1	0	0.11	1	0	-0.04	1	0	-0.12	1	0
FBgn0039113	CG10217	0.03	1	0	0.07	1	0	0.07	1	0	-0.13	1	0	-0.18	0.8	0.09691	0.04	1	0	-0.06	1	0	0.08	0.97	0.0132283	-0.04	1	0	-0.24	0.55	0.259637	-0.05	1	0	-0.11	0.94	0.0268721	0.05	1	0	-0.04	1	0	-0.16	1	0
FBgn0039112	CG10219	-0.18	1	0	-0.04	1	0	-0.33	0.94	0.0268721	0.02	1	0	0.28	0.65	0.187087	-0.32	1	0	-0.03	1	0	-0.22	0.96	0.0177288	-0.14	1	0	0.02	1	0	-0.07	1	0	-0.1	0.98	0.00877392	-0.1	0.96	0.0177288	0.2	0.78	0.107905	0.18	0.81	0.091515
FBgn0036356	CG10222	0.09	1	0	-0.03	1	0	-0.19	1	0	-0.03	1	0	-0.33	0.74	0.130768	0.16	1	0	-0.02	1	0	0.38	0.89	0.05061	0.39	1	0	-0.01	1	0	-0.31	0.8	0.09691	-0.12	1	0	0.49	0.81	0.091515	0.25	1	0	0.18	1	0
FBgn0035695	CG10226	-0.75	1	0	-0.69	1	0	-1.1	0.51	0.29243	0.11	1	0	0.56	0.37	0.431798	-0.35	1	0	-0.08	1	0	-0.36	0.96	0.0177288	-0.11	1	0	0.02	1	0	0.07	0.99	0.00436481	-0.03	1	0	-0.2	0.74	0.130768	0.04	1	0	0.009	1	0
FBgn0039108	CG10232	-1.3	0.44	0.356547	-1.21	0.98	0.00877392	-1.29	0.3	0.522879	-1.01	1	0	-1.26	0.8	0.09691	-1.91	1	0	-0.03	1	0	0.05	1	0	-0.38	1	0	-2.02	0.25	0.60206	-1.47	0.55	0.259637	-1.72	0.36	0.443697	0.29	1	0	-0.57	1	0	-0.72	1	0
FBgn0032783	CG10237	0.48	1	0	0.31	1	0	0.29	1	0	-0.08	1	0	-0.05	1	0	0.07	1	0	0.02	1	0	0.09	0.96	0.0177288	-0.00616	1	0	0.05	1	0	-0.13	0.91	0.0409586	0.03	1	0	-0.07	0.99	0.00436481	-0.22	0.7	0.154902	-0.15	0.95	0.0222764
FBgn0027514	CG1024	-0.09	1	0	-0.11	1	0	0.13	1	0	-0.32	1	0	-0.39	0.63	0.200659	0.13	1	0	0.03	1	0	0.27	0.95	0.0222764	0.1	1	0	0.19	0.91	0.0409586	0.1	1	0	0.00574	1	0	0.28	0.96	0.0177288	-0.06	1	0	0.06	1	0
FBgn0027596	CG10249	-0.23	1	0	-0.00489	1	0	-0.37	0.76	0.119186	-0.26	1	0	0.35	0.56	0.251812	-0.46	0.78	0.107905	-0.22	1	0	-0.19	0.96	0.0177288	-0.32	1	0	-0.2	0.62	0.207608	0.12	0.91	0.0409586	-0.23	0.46	0.337242	-0.37	0.68	0.167491	0.08	1	0	-0.33	0.79	0.102373
FBgn0039104	CG10252	1.02	0.16	0.79588	0.69	0.99	0.00436481	1.1	0.05	1.30103	-0.13	1	0	-0.17	1	0	-0.76	1	0	-0.07	1	0	4.17	0.96	0.0177288	2.47	1	0	0.08	1	0	0.18	0.91	0.0409586	0.22	0.76	0.119186	0.11	0.96	0.0177288	0.38	0.09	1.04576	0.37	0.09	1.04576
FBgn0033983	CG10253	0.19	1	0	0.07	1	0	0.22	1	0	0.19	1	0	0.52	0.67	0.173925	-0.55	1	0	0.06	1	0	-0.19	1	0	-0.15	1	0	-0.2	0.73	0.136677	-0.04	1	0	-0.13	0.91	0.0409586	0.0093	1	0	0.05	1	0	-0.02	1	0
FBgn0027512	CG10254	0.26	1	0	0.16	1	0	0.25	1	0	0.00329	1	0	-0.13	0.98	0.00877392	0.09	1	0	-0.000616	1	0	-0.05	1	0	-0.04	1	0	0.12	0.96	0.0177288	0.12	0.96	0.0177288	0.21	0.76	0.119186	0.44	0.26	0.585027	0.23	0.92	0.0362122	0.27	0.78	0.107905
FBgn0033985	CG10257	1.68	0.62	0.207608	0.8	1	0	1.1	0.92	0.0362122	0.78	1	0	0.82	0.74	0.130768	-0.6	1	0	-0.18	1	0	-0.77	0.96	0.0177288	0.18	1	0	-0.51	0.6	0.221849	-0.16	1	0	-0.26	0.91	0.0409586	-0.1	1	0	-0.03	1	0	0.2	1	0
FBgn0032813	CG10262	0.32	1	0	0.05	1	0	0.12	1	0	0.07	1	0	0.67	0.7	0.154902	0.06	1	0	-0.85	1	0	-0.96	0.73	0.136677	-0.55	1	0	-0.26	0.84	0.0757207	-0.46	0.57	0.244125	-0.28	0.82	0.0861861	-0.15	1	0	-0.09	1	0	-0.12	1	0
FBgn0038394	CG10264	1.28	1	0	0.00674	1	0	1.96	0.87	0.0604807	-3.8	1	0	0.89	0.95	0.0222764	-1.51	1	0	-0.88	1	0	-0.99	0.99	0.00436481	0.7	1	0	-1.31	0.79	0.102373	-2.24	0.6	0.221849	-2.99	0.42	0.376751	-0.03	1	0	-1.21	1	0	0.42	1	0
FBgn0033990	CG10265	-0.00799	1	0	0.22	1	0	0.18	1	0	-0.23	1	0	-0.36	0.69	0.161151	0.11	1	0	-0.09	1	0	0.12	0.99	0.00436481	0.12	1	0	-0.16	0.95	0.0222764	-0.04	1	0	0.05	1	0	0.45	0.76	0.119186	0.26	1	0	0.26	1	0
FBgn0032811	CG10268	-0.03	1	0	-0.00428	1	0	0.14	1	0	0.08	1	0	-0.00289	1	0	0.15	1	0	-0.05	1	0	0.16	0.96	0.0177288	0.11	1	0	0.15	0.96	0.0177288	0.42	0.57	0.244125	0.2	0.91	0.0409586	0.29	0.92	0.0362122	0.33	0.97	0.0132283	0.36	0.93	0.0315171
FBgn0035690	CG10274	-0.000688	1	0	-0.03	1	0	-0.21	1	0	-0.15	1	0	-0.25	0.74	0.130768	0.15	1	0	-0.02	1	0	0.18	0.96	0.0177288	0.08	1	0	-0.12	0.97	0.0132283	-0.17	0.92	0.0362122	0.00475	1	0	0.25	0.89	0.05061	-0.02	1	0	-0.06	1	0
FBgn0037395	CG10280	0.54	1	0	-0.02	1	0	1.1	0.99	0.00436481	0.03	1	0	4.45	0.7	0.154902	2.31	1	0	-0.03	1	0	-1.52	0.96	0.0177288	-3.62	1	0	-0.09	1	0	2.2	0.97	0.0132283	-0.03	1	0	3.11	0.92	0.0362122	0.07	1	0	-0.00902	1	0
FBgn0032681	CG10283	-0.1	1	0	0.00244	1	0	-0.11	1	0	0.21	1	0	0.23	0.87	0.0604807	0.04	1	0	-0.07	1	0	-0.13	1	0	-0.18	1	0	-0.03	1	0	0.08	1	0	-0.02	1	0	0.07	1	0	0.03	1	0	-0.03	1	0
FBgn0037439	CG10286	-0.47	0.84	0.0757207	-0.19	1	0	-0.32	0.99	0.00436481	0.17	1	0	0.1	0.95	0.0222764	0.04	1	0	0.05	1	0	0.06	1	0	0.12	1	0	-0.07	1	0	0.07	1	0	-0.11	0.99	0.00436481	0.27	0.95	0.0222764	0.05	1	0	0.01	1	0
FBgn0035688	CG10289	-0.18	1	0	-0.08	1	0	-0.12	1	0	0.12	1	0	0.02	1	0	0.06	1	0	-0.02	1	0	-0.00392	1	0	-0.09	1	0	-0.17	0.75	0.124939	-0.02	1	0	-0.2	0.62	0.207608	0.04	1	0	-0.09	1	0	-0.05	1	0
FBgn0037432	CG10298	1.08	0.36	0.443697	0.57	1	0	1.26	0.12	0.920819	0.00577	1	0	-2.27	0.9	0.0457575	-0.1	1	0	#N/A	#N/A	#N/A	#N/A	#N/A	#N/A	#N/A	#N/A	#N/A	0.29	0.62	0.207608	0.21	0.85	0.0705811	0.32	0.51	0.29243	0.2	0.92	0.0362122	0.4	0.5	0.30103	0.42	0.41	0.387216
FBgn0039107	CG10300	-1.09	0.23	0.638272	-1.16	0.22	0.657577	-1.65	0.00284	2.54668	0.65	1	0	-0.04	1	0	-0.24	1	0	0.05	1	0	-0.55	0.96	0.0177288	-0.21	1	0	0.18	0.96	0.0177288	-0.17	0.97	0.0132283	0.19	0.94	0.0268721	-0.11	1	0	-0.21	1	0	0.3	1	0
FBgn0039106	CG10301	-0.3	1	0	0.43	1	0	-1.47	0.85	0.0705811	1.35	1	0	0.66	0.99	0.00436481	-0.12	1	0	-0.28	1	0	-4.68	0.93	0.0315171	-1.3	1	0	-1.7	0.66	0.180456	-0.55	0.99	0.00436481	-1.23	0.81	0.091515	2.2	0.32	0.49485	1.69	0.7	0.154902	1.69	0.65	0.187087
FBgn0034654	CG10306	0.03	1	0	0.08	1	0	0.07	1	0	-0.03	1	0	-0.00373	1	0	0.02	1	0	-0.06	1	0	0.08	0.98	0.00877392	0.05	1	0	0.02	1	0	-0.03	1	0	0.04	1	0	0.05	1	0	0.02	1	0	-0.06	1	0
FBgn0034655	CG10307	0.86	0.54	0.267606	0.62	1	0	1.05	0.2	0.69897	0.05	1	0	0.36	0.75	0.124939	-0.22	1	0	-0.17	1	0	-0.63	0.96	0.0177288	-0.39	1	0	0.1	0.95	0.0222764	0.11	0.95	0.0222764	0.14	0.85	0.0705811	-0.00762	1	0	0.11	1	0	0.2	1	0
FBgn0038420	CG10311	-0.07	1	0	0.13	1	0	-0.14	1	0	0.13	1	0	0.38	0.64	0.19382	-0.28	1	0	-0.14	1	0	-0.62	0.92	0.0362122	-0.23	1	0	-0.03	1	0	0.08	0.98	0.00877392	-0.04	1	0	-0.29	0.81	0.091515	-0.22	0.99	0.00436481	-0.17	1	0
FBgn0038423	CG10317	1.25	0.1	1	0.95	0.6	0.221849	1.33	0.03	1.52288	-0.00562	1	0	-0.87	1	0	1.08	1	0	-0.07	1	0	-0.04	1	0	4.26	1	0	0.43	0.14	0.853872	0.38	0.32	0.49485	0.26	0.59	0.229148	0.3	0.33	0.481486	0.34	0.21	0.677781	0.38	0.09	1.04576
FBgn0034645	CG10320	-0.07	1	0	-0.08	1	0	-0.22	1	0	-0.01	1	0	0.35	0.57	0.244125	-0.18	1	0	-0.17	1	0	-0.24	0.96	0.0177288	-0.1	1	0	0.17	0.74	0.130768	0.01	1	0	0.00188	1	0	0.12	0.95	0.0222764	0.49	0.00959	2.01818	0.28	0.38	0.420216
FBgn0034643	CG10321	-0.11	1	0	-0.09	1	0	-0.11	1	0	-0.05	1	0	-0.14	0.9	0.0457575	0.04	1	0	0.00916	1	0	0.11	0.96	0.0177288	0.00948	1	0	-0.1	0.94	0.0268721	0.03	1	0	-0.07	0.99	0.00436481	0.13	0.98	0.00877392	-0.06	1	0	-0.08	1	0
FBgn0038454	CG10324	-0.12	1	0	0.1	1	0	-0.05	1	0	-0.23	1	0	-0.26	0.82	0.0861861	0.13	1	0	-0.04	1	0	0.17	0.96	0.0177288	0.09	1	0	-0.16	0.96	0.0177288	0.02	1	0	-0.3	0.77	0.113509	0.07	1	0	-0.25	1	0	-0.23	1	0
FBgn0038453	CG10326	0.16	1	0	0.21	1	0	0.25	1	0	-0.12	1	0	-0.23	0.8	0.09691	0.12	1	0	0.02	1	0	0.18	0.96	0.0177288	0.16	1	0	0.21	0.61	0.21467	0.2	0.71	0.148742	0.19	0.68	0.167491	0.28	0.87	0.0604807	0.04	1	0	0.1	1	0
FBgn0260455	CG10332	1.48	0.37	0.431798	1.28	0.99	0.00436481	1.61	0.17	0.769551	-2.38	1	0	-2.27	0.9	0.0457575	0.74	1	0	-0.07	1	0	3.01	0.96	0.0177288	0.08	1	0	-0.03	1	0	-0.05	1	0	0.33	0.56	0.251812	0.18	0.98	0.00877392	0.32	0.99	0.00436481	0.34	1	0
FBgn0032690	CG10333	-0.21	1	0	-0.13	1	0	-0.16	1	0	0.02	1	0	-0.07	1	0	0.02	1	0	0.03	1	0	0.01	1	0	-0.06	1	0	-0.12	0.95	0.0222764	-0.00013	1	0	-0.22	0.72	0.142668	0.12	0.98	0.00877392	-0.1	1	0	-0.03	1	0
FBgn0032698	CG10336	-0.08	1	0	-0.17	1	0	-0.04	1	0	-0.4	1	0	-0.52	0.37	0.431798	0.06	1	0	-0.02	1	0	0.12	0.96	0.0177288	-0.07	1	0	-0.04	1	0	0.04	1	0	-0.05	1	0	2.1	0.00464	2.33348	1.19	0.4	0.39794	0.76	0.83	0.0809219
FBgn0032805	CG10337	-0.08	1	0	-0.37	1	0	-0.09	1	0	0.71	0.38	0.420216	0.5	0.53	0.275724	0.23	1	0	0.92	1	0	0.59	0.94	0.0268721	0.86	1	0	-0.13	1	0	0.14	1	0	0.02	1	0	0.13	1	0	0.05	1	0	0.06	1	0
FBgn0032700	CG10338	0.2	1	0	0.12	1	0	0.11	1	0	-0.11	1	0	-0.17	0.9	0.0457575	-0.01	1	0	0.05	1	0	0.27	0.9	0.0457575	0.1	1	0	-0.13	0.96	0.0177288	-0.03	1	0	-0.00547	1	0	0.04	1	0	-0.02	1	0	0.08	1	0
FBgn0034972	CG10339	-1.09	1	0	0.09	1	0	0.28	1	0	0.45	1	0	0.48	0.9	0.0457575	0.02	1	0	-0.17	1	0	-0.24	1	0	-0.42	1	0	-0.04	1	0	0.33	0.85	0.0705811	0.24	0.93	0.0315171	0.03	1	0	0.07	1	0	-0.05	1	0
FBgn0022344	CG10340	-0.18	1	0	-0.21	1	0	-0.09	1	0	-0.04	1	0	0.05	1	0	-0.1	1	0	0.00562	1	0	-0.05	1	0	-0.05	1	0	0.2	0.83	0.0809219	0.14	0.96	0.0177288	-0.12	0.94	0.0268721	0.07	1	0	0.24	0.88	0.0555173	0.16	1	0
FBgn0032701	CG10341	-0.13	1	0	0.00473	1	0	-0.18	1	0	0.3	1	0	0.25	0.72	0.142668	0.05	1	0	0.06	1	0	-0.05	1	0	0.02	1	0	0.33	0.34	0.468521	0.27	0.61	0.21467	0.36	0.27	0.568636	0.65	0.03	1.52288	0.46	0.32	0.49485	0.58	0.09	1.04576
FBgn0032703	CG10343	0.00632	1	0	-0.03	1	0	0.09	1	0	-0.11	1	0	-0.21	0.85	0.0705811	0.07	1	0	0.02	1	0	0.09	1	0	-0.01	1	0	0.25	0.58	0.236572	0.16	0.89	0.05061	0.08	1	0	0.2	0.94	0.0268721	0.11	1	0	0.32	0.78	0.107905
FBgn0034729	CG10344	0.86	0.66	0.180456	0.39	1	0	0.67	0.77	0.113509	-0.15	1	0	-0.35	0.7	0.154902	0.09	1	0	-0.15	1	0	0.08	1	0	-0.12	1	0	-0.18	0.92	0.0362122	-0.07	1	0	-0.06	1	0	0.32	0.92	0.0362122	0.23	1	0	0.21	1	0
FBgn0027562	CG10345	-0.57	1	0	-0.77	1	0	-1.08	0.47	0.327902	0.19	1	0	0.54	0.23	0.638272	-0.12	1	0	-0.02	1	0	-0.5	0.74	0.130768	-0.26	1	0	-0.01	1	0	-0.00639	1	0	0.06	1	0	-0.18	0.81	0.091515	-0.11	1	0	-0.08	1	0
FBgn0030342	CG10347	-0.00913	1	0	0.03	1	0	-0.06	1	0	-0.19	1	0	-0.21	0.84	0.0757207	-0.04	1	0	0.01	1	0	0.13	0.96	0.0177288	0.08	1	0	0.05	1	0	0.19	0.88	0.0555173	0.27	0.62	0.207608	0.2	0.92	0.0362122	0.24	0.94	0.0268721	0.23	0.95	0.0222764
FBgn0032707	CG10348	0.1	1	0	0.49	1	0	0.31	1	0	0.07	1	0	0.26	0.91	0.0409586	-0.82	1	0	0.27	1	0	-0.26	1	0	-0.2	1	0	0.33	0.58	0.236572	0.43	0.4	0.39794	0.39	0.41	0.387216	-0.2	0.97	0.0132283	-0.1	1	0	-0.12	1	0
FBgn0030348	CG10352	0.29	1	0	0.56	1	0	0.04	1	0	0.55	1	0	0.78	0.51	0.29243	-0.19	1	0	-0.15	1	0	-0.52	0.96	0.0177288	-0.28	1	0	-0.37	0.41	0.387216	-0.22	0.83	0.0809219	0.15	0.93	0.0315171	-0.54	0.53	0.275724	-0.37	0.9	0.0457575	-0.15	1	0
FBgn0030349	CG10353	-0.33	1	0	-0.34	1	0	-0.46	0.7	0.154902	0.08	1	0	0.25	0.74	0.130768	-0.03	1	0	-0.02	1	0	-0.14	0.96	0.0177288	-0.07	1	0	-0.21	0.61	0.21467	-0.12	0.92	0.0362122	-0.18	0.71	0.148742	-0.08	1	0	-0.07	1	0	-0.12	1	0
FBgn0035453	CG10357	1.23	1	0	-0.01	1	0	-0.12	1	0	-0.24	1	0	0.18	1	0	-0.81	1	0	0.52	1	0	-0.26	1	0	0.08	1	0	-0.31	0.95	0.0222764	0.49	0.81	0.091515	-0.49	0.79	0.102373	-0.02	1	0	0.29	1	0	-0.16	1	0
FBgn0035452	CG10359	0.12	1	0	-0.06	1	0	0.00154	1	0	-0.59	1	0	0.4	0.84	0.0757207	-0.63	1	0	0.02	1	0	-0.54	0.96	0.0177288	0.41	1	0	-0.85	0.03	1.52288	-0.27	0.86	0.0655015	-0.58	0.26	0.585027	-0.25	0.96	0.0177288	-0.52	0.8	0.09691	0.06	1	0
FBgn0036208	CG10361	-0.76	1	0	-0.38	1	0	-1.5	0.24	0.619789	0.7	0.96	0.0177288	0.33	0.86	0.0655015	-0.24	1	0	-0.23	1	0	-0.43	0.96	0.0177288	-0.31	1	0	0.000626	1	0	-0.4	0.56	0.251812	-0.22	0.87	0.0604807	-0.29	0.95	0.0222764	-0.54	0.7	0.154902	-0.63	0.49	0.309804
FBgn0030358	CG10362	-0.55	1	0	-0.35	1	0	-0.28	1	0	0.28	1	0	0.2	0.96	0.0177288	-0.49	1	0	-0.07	1	0	-0.53	0.96	0.0177288	-0.27	1	0	-0.1	1	0	-0.28	0.77	0.113509	-0.27	0.73	0.136677	-0.21	0.96	0.0177288	-0.05	1	0	-0.07	1	0
FBgn0039109	CG10365	0.15	1	0	0.17	1	0	0.18	1	0	0.15	1	0	0.09	1	0	0.04	1	0	-0.04	1	0	0.03	1	0	-0.08	1	0	0.02	1	0	-0.00784	1	0	0.11	0.91	0.0409586	0.11	0.99	0.00436481	0.12	1	0	0.19	1	0
FBgn0032814	CG10366	-0.12	1	0	-0.02	1	0	-0.02	1	0	-0.17	1	0	-0.22	0.84	0.0757207	0.06	1	0	-0.06	1	0	0.08	1	0	0.03	1	0	-0.18	0.79	0.102373	-0.06	1	0	-0.04	1	0	0.15	0.96	0.0177288	0.11	1	0	0.03	1	0
FBgn0039116	CG10375	0.03	1	0	0.02	1	0	0.1	1	0	-0.07	1	0	-0.21	0.84	0.0757207	0.00889	1	0	-0.00788	1	0	0.2	0.96	0.0177288	0.1	1	0	0.09	1	0	0.22	0.86	0.0655015	-0.12	0.96	0.0177288	0.11	0.99	0.00436481	-0.11	1	0	-0.11	1	0
FBgn0032702	CG10376	-0.16	1	0	-0.03	1	0	-0.22	1	0	0.07	1	0	-0.12	0.92	0.0362122	0.08	1	0	-0.05	1	0	0.09	0.96	0.0177288	-0.07	1	0	-0.19	0.78	0.107905	-0.12	0.96	0.0177288	-0.17	0.85	0.0705811	0.03	1	0	-0.14	1	0	-0.06	1	0
FBgn0032699	CG10383	0.13	1	0	0.05	1	0	0.07	1	0	0.19	1	0	0.26	0.68	0.167491	0.21	1	0	0.64	0.14	0.853872	0.61	0.09	1.04576	0.5	1	0	-0.07	1	0	-0.04	1	0	-0.06	1	0	0.61	0.19	0.721246	0.09	1	0	0.05	1	0
FBgn0034731	CG10384	-0.93	1	0	-1.12	1	0	-0.44	1	0	0.31	1	0	0.39	0.88	0.0555173	-0.28	1	0	-0.68	1	0	-0.86	0.96	0.0177288	-0.4	1	0	-0.07	1	0	-0.04	1	0	-0.38	0.59	0.229148	-0.1	1	0	0.04	1	0	-0.2	1	0
FBgn0033019	CG10395	-0.07	1	0	0.17	1	0	-0.09	1	0	-0.11	1	0	-0.38	0.54	0.267606	0.03	1	0	0.00523	1	0	0.26	0.96	0.0177288	0.02	1	0	-0.08	1	0	0.18	0.92	0.0362122	-0.05	1	0	0.51	0.7	0.154902	0.05	1	0	-0.00243	1	0
FBgn0033020	CG10396	0.95	0.39	0.408935	0.7	1	0	1.02	0.2	0.69897	0.96	1	0	1.71	0.59	0.229148	1.72	1	0	-0.58	1	0	-2.46	0.94	0.0268721	-1.3	1	0	0.38	0.27	0.568636	0.3	0.58	0.236572	0.39	0.26	0.585027	0.24	0.58	0.236572	0.51	0.00525	2.27984	0.5	0.0079	2.10237
FBgn0031877	CG10399	0.58	0.93	0.0315171	0.65	1	0	0.38	1	0	0.68	0.24	0.619789	0.38	0.64	0.19382	0.42	1	0	0.72	1	0	0.61	0.65	0.187087	0.41	1	0	0.5	0.13	0.886057	0.23	0.83	0.0809219	0.23	0.78	0.107905	0.2	0.97	0.0132283	0.28	1	0	0.34	0.97	0.0132283
FBgn0038431	CG10405	-0.47	1	0	-0.81	0.96	0.0177288	-0.65	0.58	0.236572	-0.64	1	0	-0.49	0.91	0.0409586	-0.68	1	0	0.48	1	0	-0.6	0.96	0.0177288	-0.16	1	0	-0.51	0.96	0.0177288	-0.02	1	0	0.37	0.98	0.00877392	0.17	1	0	0.52	1	0	0.49	1	0
FBgn0038395	CG10407	-0.19	1	0	0.08	1	0	0.14	1	0	0.12	1	0	0.37	0.84	0.0757207	0.18	1	0	0.53	0.71	0.148742	0.14	0.96	0.0177288	0.3	1	0	0.06	1	0	0.26	0.44	0.356547	0.22	0.52	0.283997	0.06	1	0	0.13	1	0	0.19	0.75	0.124939
FBgn0037440	CG1041	-0.13	1	0	0.04	1	0	-0.41	0.91	0.0409586	0.09	1	0	0.15	0.88	0.0555173	0.05	1	0	-0.07	1	0	0.03	1	0	0.01	1	0	-0.23	0.56	0.251812	-0.21	0.67	0.173925	-0.16	0.8	0.09691	-0.16	0.96	0.0177288	-0.21	1	0	-0.12	1	0
FBgn0032689	CG10413	-0.12	1	0	-0.25	1	0	-0.1	1	0	-0.03	1	0	-0.11	0.95	0.0222764	0.11	1	0	-0.05	1	0	-0.02	1	0	0.00375	1	0	0.14	0.83	0.0809219	0.02	1	0	0.08	0.97	0.0132283	-0.01	1	0	-0.07	1	0	0.05	1	0
FBgn0033021	CG10417	-0.05	1	0	0.06	1	0	-0.06	1	0	-0.05	1	0	-0.18	0.85	0.0705811	0.1	1	0	0.03	1	0	0.24	0.96	0.0177288	0.07	1	0	0.08	0.97	0.0132283	0.14	0.87	0.0604807	0.00718	1	0	0.22	0.77	0.113509	-0.12	1	0	-0.19	0.89	0.05061
FBgn0036277	CG10418	-0.04	1	0	-0.16	1	0	-0.14	1	0	-0.06	1	0	-0.17	0.91	0.0409586	0.11	1	0	-0.26	1	0	0.08	1	0	0.05	1	0	0.28	0.84	0.0757207	0.27	0.9	0.0457575	0.27	0.86	0.0655015	0.07	1	0	0.00559	1	0	-0.24	1	0
FBgn0039296	CG10420	1.11	0.36	0.443697	0.58	1	0	0.72	0.67	0.173925	0.14	1	0	-0.00669	1	0	0.42	1	0	0.06	1	0	0.28	0.96	0.0177288	0.18	1	0	-0.31	0.77	0.113509	-0.04	1	0	-0.03	1	0	-0.07	1	0	0.24	1	0	-0.18	1	0
FBgn0036848	CG10424	-0.09	1	0	-0.18	1	0	-0.11	1	0	0.06	1	0	-0.04	1	0	0.09	1	0	0.02	1	0	0.22	0.96	0.0177288	0.13	1	0	-0.04	1	0	-0.02	1	0	0.11	0.95	0.0222764	-0.06	1	0	-0.04	1	0	-0.09	1	0
FBgn0039304	CG10425	-0.32	1	0	-0.25	1	0	-0.47	0.62	0.207608	-0.09	1	0	-0.05	1	0	-0.12	1	0	-0.04	1	0	0.04	1	0	0.03	1	0	0.26	0.58	0.236572	-0.09	0.99	0.00436481	0.2	0.76	0.119186	0.01	1	0	-0.09	1	0	0.03	1	0
FBgn0036273	CG10426	-0.21	1	0	0.01	1	0	-0.06	1	0	-0.14	1	0	-0.06	1	0	0.04	1	0	0.15	1	0	0.19	0.96	0.0177288	0.12	1	0	0.000984	1	0	0.00688	1	0	-0.19	0.87	0.0604807	-0.04	1	0	-0.01	1	0	0.03	1	0
FBgn0032724	CG10428	0.17	1	0	0.25	1	0	0.14	1	0	-0.06	1	0	-0.16	0.9	0.0457575	-0.05	1	0	0.04	1	0	0.17	0.96	0.0177288	0.06	1	0	0.25	0.61	0.21467	0.27	0.6	0.221849	0.17	0.83	0.0809219	0.37	0.61	0.21467	0.12	1	0	0.14	1	0
FBgn0032730	CG10431	-0.19	1	0	0.1	1	0	-0.48	1	0	-0.02	1	0	-0.18	0.91	0.0409586	0.14	1	0	-0.44	1	0	-0.21	0.96	0.0177288	-0.17	1	0	0.28	0.87	0.0604807	0.18	0.97	0.0132283	0.1	1	0	0.28	0.96	0.0177288	0.23	1	0	-0.07	1	0
FBgn0034638	CG10433	-0.35	1	0	0.26	1	0	-0.59	0.74	0.130768	0.24	1	0	0.4	0.47	0.327902	-0.24	1	0	-0.07	1	0	-0.3	0.96	0.0177288	-0.1	1	0	0.07	1	0	-0.1	0.97	0.0132283	-0.02	1	0	-0.12	0.96	0.0177288	-0.16	1	0	-0.1	1	0
FBgn0037539	CG10435	0.09	1	0	0.12	1	0	0.18	1	0	-0.19	1	0	-0.23	0.81	0.091515	0.08	1	0	-0.0082	1	0	0.13	0.96	0.0177288	0.07	1	0	-0.00476	1	0	-0.1	1	0	-0.2	0.85	0.0705811	0.05	1	0	-0.12	1	0	-0.08	1	0
FBgn0034636	CG10440	0.05	1	0	-0.1	1	0	0.11	1	0	0.4	1	0	0.36	0.91	0.0409586	0.37	1	0	-0.97	1	0	-0.31	1	0	0.18	1	0	-0.21	0.92	0.0362122	-0.25	0.89	0.05061	-0.03	1	0	-0.24	0.96	0.0177288	-0.06	1	0	-0.00139	1	0
FBgn0034494	CG10444	0.33	1	0	-0.03	1	0	0.22	1	0	-0.02	1	0	-0.18	0.84	0.0757207	0.2	1	0	-0.02	1	0	0.16	0.96	0.0177288	0.05	1	0	-0.18	0.74	0.130768	-0.16	0.84	0.0757207	-0.12	0.9	0.0457575	0.07	1	0	0.12	1	0	0.05	1	0
FBgn0037531	CG10445	-0.07	1	0	0.12	1	0	-0.03	1	0	-0.32	1	0	-0.55	0.36	0.443697	0.09	1	0	-0.07	1	0	0.15	0.96	0.0177288	0.07	1	0	0.52	0.63	0.200659	0.13	1	0	0.5	0.66	0.180456	1.36	0.18	0.744727	0.51	1	0	0.37	1	0
FBgn0033440	CG10459	0.41	1	0	0.27	1	0	0.65	0.67	0.173925	0.22	1	0	-0.3	1	0	0.19	1	0	0.94	1	0	-0.72	0.96	0.0177288	0.58	1	0	0.27	0.72	0.142668	0.34	0.62	0.207608	0.52	0.15	0.823909	0.3	0.93	0.0315171	0.58	0.58	0.236572	0.54	0.62	0.207608
FBgn0032815	CG10462	-0.08	1	0	-0.21	1	0	-0.29	1	0	-0.1	1	0	-0.04	1	0	-0.01	1	0	-0.04	1	0	-0.04	1	0	-0.1	1	0	0.09	1	0	0.08	1	0	0.03	1	0	0.17	0.96	0.0177288	-0.09	1	0	-0.07	1	0
FBgn0032819	CG10463	-0.27	1	0	-0.31	1	0	-0.34	1	0	-0.2	1	0	0.02	1	0	-0.03	1	0	0.07	1	0	0.05	1	0	0.07	1	0	0.1	1	0	0.43	0.76	0.119186	-0.03	1	0	0.27	0.96	0.0177288	-0.06	1	0	-0.31	1	0
FBgn0033017	CG10465	-0.05	1	0	-0.00144	1	0	-0.03	1	0	-0.05	1	0	-0.2	0.82	0.0861861	0.08	1	0	0.06	1	0	0.24	0.81	0.091515	0.03	1	0	-0.03	1	0	-0.01	1	0	-0.06	1	0	0.15	0.96	0.0177288	-0.02	1	0	0.00339	1	0
FBgn0032822	CG10466	-0.17	1	0	0.02	1	0	-0.28	1	0	-0.3	1	0	-0.26	0.9	0.0457575	-0.12	1	0	-0.11	1	0	0.24	0.96	0.0177288	0.06	1	0	0.25	0.92	0.0362122	-0.06	1	0	-0.09	1	0	0.35	0.95	0.0222764	0.22	1	0	0.2	1	0
FBgn0035679	CG10467	-0.07	1	0	-0.08	1	0	-0.51	0.69	0.161151	0.25	1	0	0.29	0.71	0.148742	-0.07	1	0	0.1	1	0	0.06	1	0	0.21	1	0	0.15	0.81	0.091515	-0.03	1	0	0.13	0.87	0.0604807	-0.08	1	0	-0.03	1	0	-0.09	1	0
FBgn0035678	CG10469	-0.08	1	0	-0.29	1	0	-0.55	0.81	0.091515	-0.01	1	0	0.37	0.67	0.173925	-0.06	1	0	-0.16	1	0	-0.13	1	0	-0.06	1	0	0.48	0.46	0.337242	0.08	1	0	0.41	0.59	0.229148	-0.13	1	0	-0.12	1	0	-0.38	0.87	0.0604807
FBgn0032746	CG10470	-0.11	1	0	0.07	1	0	0.04	1	0	-0.06	1	0	-0.12	0.91	0.0409586	0.04	1	0	0.04	1	0	0.19	0.96	0.0177288	0.03	1	0	-0.09	1	0	0.00395	1	0	-0.07	1	0	0.26	0.86	0.0655015	0.05	1	0	0.04	1	0
FBgn0035670	CG10472	-2.68	0.05	1.30103	-2.67	0.06	1.22185	-3.65	0.000267	3.57349	0.19	1	0	0.32	0.7	0.154902	-0.28	1	0	0.1	1	0	-0.34	0.93	0.0315171	0.05	1	0	0.25	0.77	0.113509	-0.14	0.97	0.0132283	0.13	0.96	0.0177288	-0.0065	1	0	-0.34	0.17	0.769551	-0.46	0.01	2
FBgn0034427	CG10474	-0.63	1	0	-3.66	1	0	-3.86	0.9	0.0457575	#N/A	#N/A	#N/A	#N/A	#N/A	#N/A	#N/A	#N/A	#N/A	#N/A	#N/A	#N/A	#N/A	#N/A	#N/A	#N/A	#N/A	#N/A	2.21	0.96	0.0177288	-0.09	1	0	2.29	0.94	0.0268721	-2.31	0.96	0.0177288	-2.22	1	0	-2.3	1	0
FBgn0034426	CG10476	-3.27	1	0	-3.11	1	0	-3.3	0.99	0.00436481	4.18	1	0	4.15	0.75	0.124939	3.67	1	0	3.14	1	0	2.18	0.96	0.0177288	0.08	1	0	-3.32	0.84	0.0757207	-1.04	0.99	0.00436481	-0.95	0.99	0.00436481	-0.94	0.96	0.0177288	-1.6	0.98	0.00877392	-0.35	1	0
FBgn0035661	CG10477	-0.17	1	0	-0.9	1	0	-2.61	0.00443	2.3536	0.59	0.26	0.585027	0.7	0.07	1.1549	-0.27	1	0	0.23	1	0	-0.25	0.96	0.0177288	-0.17	1	0	0.34	0.16	0.79588	-0.17	0.8	0.09691	0.29	0.3	0.522879	0.08	0.99	0.00436481	0.34	0.2	0.69897	0.29	0.32	0.49485
FBgn0035656	CG10479	0.31	1	0	0.32	1	0	-0.03	1	0	0.34	1	0	0.6	0.37	0.431798	-0.02	1	0	-0.07	1	0	-0.16	1	0	-0.16	1	0	0.32	0.28	0.552842	-0.11	0.96	0.0177288	0.21	0.63	0.200659	-0.11	0.97	0.0132283	-0.13	1	0	-0.07	1	0
FBgn0032827	CG10481	0.00267	1	0	-0.08	1	0	-0.31	1	0	#N/A	#N/A	#N/A	#N/A	#N/A	#N/A	#N/A	#N/A	#N/A	#N/A	#N/A	#N/A	#N/A	#N/A	#N/A	#N/A	#N/A	#N/A	0.87	0.42	0.376751	0.45	0.9	0.0457575	0.93	0.33	0.481486	0.45	0.92	0.0362122	0.26	1	0	0.58	0.9	0.0457575
FBgn0035649	CG10483	-0.36	1	0	0.29	1	0	-0.13	1	0	0.16	1	0	0.43	0.78	0.107905	-0.34	1	0	0.13	1	0	-0.21	1	0	-0.33	1	0	-0.07	1	0	0.000192	1	0	-0.00407	1	0	-0.01	1	0	0.16	1	0	0.19	1	0
FBgn0035647	CG10486	-0.18	1	0	-0.17	1	0	-0.08	1	0	0.03	1	0	2.39	0.9	0.0457575	3.14	1	0	#N/A	#N/A	#N/A	#N/A	#N/A	#N/A	#N/A	#N/A	#N/A	0.08	1	0	0.18	0.99	0.00436481	0.4	0.75	0.124939	0.4	0.95	0.0222764	-0.05	1	0	0.45	1	0
FBgn0032748	CG10492	-0.04	1	0	0.08	1	0	0.06	1	0	-0.02	1	0	-0.1	0.98	0.00877392	0.36	1	0	-0.02	1	0	0.04	1	0	0.02	1	0	0.17	0.83	0.0809219	-0.07	1	0	-0.04	1	0	0.28	0.71	0.148742	0.19	0.98	0.00877392	0.02	1	0
FBgn0034634	CG10494	-0.83	0.45	0.346787	-0.61	1	0	0.17	1	0	-0.13	1	0	-0.45	0.43	0.366532	0.03	1	0	-0.00934	1	0	0.28	0.86	0.0655015	0.08	1	0	0.42	0.62	0.207608	0.07	1	0	0.12	1	0	0.67	0.69	0.161151	0.13	1	0	0.1	1	0
FBgn0032750	CG10495	-0.27	1	0	-0.3	1	0	-0.33	1	0	-0.13	1	0	-0.13	0.97	0.0132283	0.19	1	0	-0.02	1	0	0.22	0.96	0.0177288	0.27	1	0	-0.2	0.96	0.0177288	-0.36	0.83	0.0809219	-0.23	0.94	0.0268721	0.36	0.96	0.0177288	0.09	1	0	-0.06	1	0
FBgn0034612	CG10505	0.49	1	0	0.42	1	0	-0.62	0.57	0.244125	0.49	0.88	0.0555173	-0.07	1	0	-0.12	1	0	0.2	1	0	-0.75	0.94	0.0268721	-0.14	1	0	0.12	0.96	0.0177288	-0.51	0.22	0.657577	-0.02	1	0	-0.09	1	0	-0.65	0.49	0.309804	-0.16	1	0
FBgn0037060	CG10508	0.1	1	0	-0.17	1	0	0.2	1	0	0.08	1	0	0.53	0.65	0.187087	-0.24	1	0	0.17	1	0	-0.56	0.96	0.0177288	-0.05	1	0	0.19	0.84	0.0757207	0.38	0.44	0.356547	-0.03	1	0	-0.06	1	0	-0.15	1	0	0.02	1	0
FBgn0037059	CG10510	0.93	0.44	0.356547	0.75	1	0	1.06	0.19	0.721246	1.39	1	0	0.83	1	0	0.74	1	0	2.28	1	0	-0.04	1	0	0.08	1	0	0.29	0.68	0.167491	0.21	0.87	0.0604807	0.47	0.23	0.638272	0.27	0.81	0.091515	0.25	0.91	0.0409586	0.35	0.59	0.229148
FBgn0037057	CG10512	-0.52	0.99	0.00436481	-0.24	1	0	-0.87	0.27	0.568636	0.52	0.79	0.102373	0.29	0.78	0.107905	-0.05	1	0	-0.07	1	0	-0.24	0.96	0.0177288	-0.11	1	0	-0.11	0.93	0.0315171	-0.27	0.45	0.346787	-0.14	0.85	0.0705811	-0.08	0.97	0.0132283	0.21	0.73	0.136677	0.14	0.99	0.00436481
FBgn0039311	CG10513	-0.13	1	0	0.37	1	0	0.02	1	0	-0.07	1	0	0.82	0.09	1.04576	-0.89	0.06	1.22185	0.09	1	0	-0.51	0.77	0.113509	-0.05	1	0	0.07	0.99	0.00436481	-0.1	0.96	0.0177288	0.18	0.67	0.173925	-0.35	0.13	0.886057	-0.98	1.15e-11	10.9393	-0.91	4.37e-10	9.35952
FBgn0039312	CG10514	0.37	0.98	0.00877392	0.29	1	0	0.23	1	0	0.28	1	0	0.51	0.26	0.585027	-0.71	0.05	1.30103	-0.23	1	0	-0.91	0.09	1.04576	-0.41	1	0	0.000115	1	0	-0.07	1	0	0.14	0.9	0.0457575	-0.53	0.00214	2.66959	-0.4	0.07	1.1549	-0.54	0.00212	2.67366
FBgn0036549	CG10516	0.12	1	0	0.15	1	0	0.34	1	0	-0.04	1	0	-0.21	0.9	0.0457575	-0.1	1	0	-0.08	1	0	-0.16	0.96	0.0177288	-0.15	1	0	-0.07	0.99	0.00436481	-0.28	0.44	0.356547	0.37	0.11	0.958607	-0.39	0.65	0.187087	-0.82	0.02	1.69897	-0.68	0.08	1.09691
FBgn0034583	CG10527	0.06	1	0	0.08	1	0	-0.37	0.97	0.0132283	-0.21	1	0	0.03	1	0	-0.1	1	0	-0.19	1	0	-0.22	0.96	0.0177288	-0.06	1	0	-0.28	0.32	0.49485	-0.27	0.43	0.366532	-0.26	0.38	0.420216	-0.38	0.08	1.09691	-0.19	0.8	0.09691	-0.06	1	0
FBgn0034570	CG10543	-0.17	1	0	0.06	1	0	-0.12	1	0	-0.00791	1	0	-0.00361	1	0	0.07	1	0	-0.00931	1	0	-0.05	1	0	-0.08	1	0	0.04	1	0	-0.03	1	0	-0.05	1	0	0.01	1	0	-0.00966	1	0	-0.08	1	0
FBgn0039321	CG10550	-0.4	1	0	-0.37	1	0	-0.94	0.24	0.619789	0.32	1	0	0.3	0.67	0.173925	-0.02	1	0	0.27	1	0	-0.2	0.96	0.0177288	0.09	1	0	-0.14	0.84	0.0757207	-0.08	0.97	0.0132283	-0.06	1	0	-0.1	0.96	0.0177288	-0.11	1	0	0.04	1	0
FBgn0039324	CG10553	-1.29	0.93	0.0315171	-2.19	0.77	0.113509	-3.48	0.07	1.1549	0.57	0.68	0.167491	0.58	0.35	0.455932	-0.38	1	0	0.23	1	0	-0.19	0.96	0.0177288	0.14	1	0	0.17	0.76	0.119186	0.04	1	0	0.14	0.85	0.0705811	-0.19	0.77	0.113509	0.00611	1	0	0.23	0.61	0.21467
FBgn0030034	CG10555	-0.29	1	0	-0.26	1	0	-0.23	1	0	-0.05	1	0	-0.12	0.93	0.0315171	0.07	1	0	0.38	1	0	0.27	0.91	0.0409586	0.16	1	0	-0.08	0.99	0.00436481	-0.05	1	0	-0.05	1	0	0.24	0.91	0.0409586	-0.06	1	0	-0.1	1	0
FBgn0039323	CG10559	-0.02	1	0	0.08	1	0	-0.03	1	0	0.53	1	0	0.07	1	0	-0.25	1	0	0.1	1	0	-0.31	1	0	0.31	1	0	-0.03	1	0	-0.29	0.9	0.0457575	-0.00962	1	0	-0.24	0.98	0.00877392	-0.02	1	0	0.04	1	0
FBgn0039325	CG10560	-1	1	0	-2.01	0.89	0.05061	-1.84	0.41	0.387216	0.53	0.6	0.221849	0.36	0.63	0.200659	-0.43	1	0	0.18	1	0	-0.41	0.85	0.0705811	-0.19	1	0	0.22	0.56	0.251812	-0.00305	1	0	0.28	0.32	0.49485	-0.23	0.61	0.21467	0.00304	1	0	0.43	0.03	1.52288
FBgn0002036	CG10561	0.65	0.58	0.236572	0.53	1	0	0.73	0.31	0.508638	0.14	1	0	0.18	0.9	0.0457575	-0.03	1	0	0.02	1	0	0.05	1	0	-0.0016	1	0	0.15	0.84	0.0757207	0.13	0.92	0.0362122	0.17	0.78	0.107905	0.00996	1	0	0.24	0.61	0.21467	0.21	0.69	0.161151
FBgn0039326	CG10562	-1.98	0.33	0.481486	-1.85	0.71	0.148742	-3.36	0.01	2	0.7	0.36	0.443697	0.4	0.65	0.187087	-0.1	1	0	0.12	1	0	-0.64	0.62	0.207608	-0.27	1	0	0.07	1	0	0.13	0.95	0.0222764	-0.04	1	0	-0.03	1	0	0.04	1	0	0.16	1	0
FBgn0037051	CG10565	-0.08	1	0	0.02	1	0	-0.04	1	0	-0.02	1	0	-0.08	1	0	0.02	1	0	-0.03	1	0	0.02	1	0	-0.01	1	0	-0.04	1	0	0.14	0.87	0.0604807	0.08	0.97	0.0132283	0.14	0.9	0.0457575	0.02	1	0	0.04	1	0
FBgn0037050	CG10566	0.15	1	0	0.18	1	0	0.22	1	0	0.3	1	0	0.8	0.63	0.200659	0.11	1	0	0.12	1	0	-0.26	1	0	0.27	1	0	0.21	0.87	0.0604807	0.13	0.97	0.0132283	-0.04	1	0	0.14	1	0	0.06	1	0	0.14	1	0
FBgn0040992	CG10570	0.32	1	0	0.01	1	0	-0.14	1	0	-0.15	1	0	0.29	0.75	0.124939	-0.88	0.01	2	-0.46	1	0	-0.61	0.25	0.60206	-0.49	1	0	-0.34	0.38	0.420216	-0.12	0.97	0.0132283	-0.36	0.32	0.49485	-0.43	0.03	1.52288	-0.23	0.65	0.187087	-0.17	0.88	0.0555173
FBgn0035630	CG10576	-0.15	1	0	-0.19	1	0	-0.2	1	0	0.04	1	0	-0.07	1	0	0.1	1	0	-0.05	1	0	0.11	0.99	0.00436481	0.07	1	0	-0.02	1	0	0.06	1	0	0.03	1	0	0.31	0.83	0.0809219	0.06	1	0	0.02	1	0
FBgn0037046	CG10581	-0.31	1	0	-0.12	1	0	-0.14	1	0	0.42	1	0	0.21	0.95	0.0222764	0.05	1	0	-0.78	1	0	-0.5	0.96	0.0177288	-0.51	1	0	0.12	1	0	0.06	1	0	-0.17	0.97	0.0132283	0.25	0.98	0.00877392	0.23	1	0	0.27	1	0
FBgn0037045	CG10584	-0.09	1	0	-0.29	1	0	-0.57	0.99	0.00436481	-0.25	1	0	-0.21	0.9	0.0457575	0.02	1	0	-0.11	1	0	0.12	1	0	0.03	1	0	0.18	0.94	0.0268721	0.14	0.98	0.00877392	-0.18	0.94	0.0268721	-0.1	1	0	0.07	1	0	-0.26	1	0
FBgn0037044	CG10585	-0.04	1	0	-0.07	1	0	-0.08	1	0	-0.15	1	0	-0.2	0.86	0.0655015	0.08	1	0	0.06	1	0	0.06	1	0	-0.02	1	0	0.06	1	0	-0.00409	1	0	-0.14	0.94	0.0268721	0.02	1	0	-0.1	1	0	-0.15	1	0
FBgn0037039	CG10587	-0.03	1	0	7.48	0.59	0.229148	8.31	0.14	0.853872	-2.38	1	0	-2.27	0.9	0.0457575	-2.35	1	0	-3.24	1	0	-3.21	0.96	0.0177288	-3.09	1	0	-0.09	1	0	0.64	0.09	1.04576	0.7	0.04	1.39794	-0.48	0.69	0.161151	0.35	0.94	0.0268721	0.54	0.54	0.267606
FBgn0037037	CG10588	1.04	0.35	0.455932	0.68	1	0	1.22	0.11	0.958607	-0.25	1	0	-1.5	0.81	0.091515	-0.68	1	0	-0.56	1	0	-0.68	1	0	-3.62	1	0	0.28	0.67	0.173925	0.39	0.44	0.356547	0.39	0.36	0.443697	0.05	1	0	0.27	0.91	0.0409586	0.38	0.54	0.267606
FBgn0037035	CG10589	0.68	0.7	0.154902	0.44	1	0	0.94	0.21	0.677781	0.93	1	0	-3.13	0.84	0.0757207	-0.95	1	0	-0.07	1	0	2.18	0.96	0.0177288	0.08	1	0	0.22	0.65	0.187087	0.2	0.77	0.113509	0.28	0.44	0.356547	0.12	1	0	0.31	0.9	0.0457575	0.47	0.48	0.318759
FBgn0035622	CG10590	-0.03	1	0	-0.00337	1	0	-0.19	1	0	0.08	1	0	-0.06	1	0	0.16	1	0	0.1	1	0	0.19	0.96	0.0177288	0.14	1	0	0.02	1	0	-0.07	1	0	-0.00916	1	0	-0.04	1	0	-0.00975	1	0	-0.16	1	0
FBgn0035621	CG10591	3.13	1	0	2.39	1	0	-0.06	1	0	-3.5	0.99	0.00436481	-3.5	0.47	0.327902	0.62	1	0	-0.27	1	0	-6.86	0.52	0.283997	-6.73	1	0	3.97	0.77	0.113509	-0.09	1	0	2.31	0.95	0.0222764	0.89	0.96	0.0177288	0.71	1	0	0.03	1	0
FBgn0035619	CG10592	-0.37	1	0	0.28	1	0	-1.29	0.5	0.30103	0.58	0.13	0.886057	0.19	0.84	0.0757207	0.04	1	0	0.19	1	0	-0.29	0.96	0.0177288	-0.06	1	0	0.1	1	0	-0.12	0.98	0.00877392	-0.14	0.94	0.0268721	0.31	0.71	0.148742	0.05	1	0	-0.02	1	0
FBgn0030832	CG10597	-3.74	0.49	0.309804	-5.85	1	0	-6.04	0.43	0.366532	#N/A	#N/A	#N/A	#N/A	#N/A	#N/A	#N/A	#N/A	#N/A	-0.04	1	0	1.22	0.96	0.0177288	-2.24	1	0	#N/A	#N/A	#N/A	#N/A	#N/A	#N/A	#N/A	#N/A	#N/A	#N/A	#N/A	#N/A	#N/A	#N/A	#N/A	#N/A	#N/A	#N/A
FBgn0003057	CG10598	-3.8	1	0	-3.64	1	0	-3.83	0.89	0.05061	#N/A	#N/A	#N/A	#N/A	#N/A	#N/A	#N/A	#N/A	#N/A	-0.27	1	0	-1.52	0.95	0.0222764	-0.62	1	0	#N/A	#N/A	#N/A	#N/A	#N/A	#N/A	#N/A	#N/A	#N/A	#N/A	#N/A	#N/A	#N/A	#N/A	#N/A	#N/A	#N/A	#N/A
FBgn0032717	CG10600	0.07	1	0	0.1	1	0	-0.06	1	0	0.06	1	0	-0.07	1	0	0.17	1	0	-0.00918	1	0	-0.03	1	0	-0.01	1	0	0.47	0.02	1.69897	0.31	0.33	0.481486	0.21	0.61	0.21467	0.12	0.93	0.0315171	-0.06	1	0	-0.000445	1	0
FBgn0032721	CG10602	-0.000781	1	0	-0.00104	1	0	-0.15	1	0	-0.01	1	0	-0.16	0.86	0.0655015	0.11	1	0	-0.01	1	0	0.05	1	0	0.02	1	0	0.11	0.93	0.0315171	0.04	1	0	0.05	1	0	0.11	0.96	0.0177288	-0.05	1	0	-0.09	1	0
FBgn0036286	CG10616	0.16	1	0	0.05	1	0	0.16	1	0	-0.15	1	0	-0.16	0.89	0.05061	0.13	1	0	0.01	1	0	0.26	0.84	0.0757207	0.12	1	0	0.02	1	0	0.07	1	0	0.16	0.76	0.119186	0.19	0.79	0.102373	0.3	0.35	0.455932	0.33	0.21	0.677781
FBgn0032726	CG10621	0.42	1	0	0.66	0.99	0.00436481	0.02	1	0	0.63	0.34	0.468521	0.39	0.6	0.221849	0.24	1	0	-0.67	0.33	0.481486	-0.62	0.22	0.657577	-0.66	0.45	0.346787	-0.47	0.14	0.853872	-0.8	0.000602	3.2204	-0.47	0.14	0.853872	-0.25	0.91	0.0409586	-0.31	0.88	0.0555173	-0.09	1	0
FBgn0032727	CG10623	0.51	0.63	0.200659	0.5	1	0	0.25	1	0	0.00525	1	0	0.06	1	0	-0.11	1	0	-0.04	1	0	-0.2	0.96	0.0177288	-0.12	1	0	-0.12	0.92	0.0362122	-0.05	1	0	-0.1	0.94	0.0268721	-0.02	1	0	-0.12	1	0	-0.18	1	0
FBgn0035612	CG10625	0.14	1	0	0.2	1	0	-0.32	0.93	0.0315171	-0.28	1	0	0.1	1	0	-1.01	1	0	0.00872	1	0	-0.62	0.96	0.0177288	-0.16	1	0	-0.49	0.92	0.0362122	-0.56	0.91	0.0409586	-0.78	0.72	0.142668	0.21	1	0	1.08	0.61	0.21467	0.43	1	0
FBgn0032818	CG10628	-0.08	1	0	0.08	1	0	0.03	1	0	-0.14	1	0	-0.16	0.91	0.0409586	0.03	1	0	-0.02	1	0	0.01	1	0	-0.03	1	0	-0.37	0.51	0.29243	-0.03	1	0	-0.13	0.95	0.0222764	0.26	0.96	0.0177288	0.1	1	0	0.05	1	0
FBgn0032817	CG10631	-0.16	1	0	-0.08	1	0	-0.11	1	0	-0.00988	1	0	-0.01	1	0	0.08	1	0	-0.14	1	0	-0.16	0.96	0.0177288	-0.08	1	0	0.04	1	0	-0.02	1	0	-0.1	0.94	0.0268721	0.02	1	0	0.03	1	0	-0.13	1	0
FBgn0035603	CG10635	0.02	1	0	-0.07	1	0	-0.07	1	0	-0.07	1	0	-0.2	0.83	0.0809219	0.09	1	0	-0.02	1	0	0.29	0.89	0.05061	0.13	1	0	-0.03	1	0	-0.03	1	0	-0.06	1	0	0.11	1	0	-0.07	1	0	-0.06	1	0
FBgn0036290	CG10638	-0.1	1	0	-0.2	1	0	-0.14	1	0	-0.08	1	0	-0.16	0.9	0.0457575	0.08	1	0	0.07	1	0	0.21	0.94	0.0268721	0.06	1	0	-0.32	0.55	0.259637	-0.21	0.85	0.0705811	-0.4	0.32	0.49485	0.06	1	0	-0.00616	1	0	-0.18	1	0
FBgn0032729	CG10639	0.41	1	0	0.58	1	0	-0.25	1	0	0.11	1	0	0.25	0.81	0.091515	-0.14	1	0	0.03	1	0	-0.03	1	0	-0.06	1	0	0.03	1	0	0.09	0.97	0.0132283	0.09	0.95	0.0222764	-0.14	0.96	0.0177288	0.1	1	0	0.15	1	0
FBgn0036292	CG10646	0.06	1	0	-0.15	1	0	-0.0093	1	0	-0.08	1	0	-0.23	0.84	0.0757207	0.19	1	0	0.14	1	0	0.22	0.96	0.0177288	0.04	1	0	0.11	1	0	-0.09	1	0	-0.33	0.7	0.154902	0.35	0.92	0.0362122	0.1	1	0	0.12	1	0
FBgn0046302	CG10650	-1.3	0.00383	2.4168	-1.17	0.02	1.69897	-1.84	5.2e-07	6.284	0.07	1	0	0.05	1	0	-0.39	1	0	-0.04	1	0	-0.59	0.17	0.769551	-0.26	1	0	0.03	1	0	-0.37	0.14	0.853872	-0.35	0.15	0.823909	-0.26	0.45	0.346787	-0.15	0.97	0.0132283	-0.04	1	0
FBgn0032853	CG10651	-2.41	1	0	0.00687	1	0	-2.45	1	0	0.35	1	0	0.15	1	0	-0.13	1	0	-1.41	1	0	-1.52	0.96	0.0177288	-0.36	1	0	0.24	0.76	0.119186	-0.22	0.85	0.0705811	0.17	0.9	0.0457575	-0.39	0.88	0.0555173	-0.35	0.98	0.00877392	-0.14	1	0
FBgn0036294	CG10654	-0.35	1	0	0.23	1	0	-0.33	1	0	0.25	1	0	-0.000934	1	0	-0.07	1	0	0.21	1	0	-0.29	0.96	0.0177288	-0.06	1	0	0.08	1	0	0.17	0.97	0.0132283	-0.35	0.69	0.161151	0.07	1	0	-0.17	1	0	-0.27	1	0
FBgn0036289	CG10657	0.07	1	0	-0.27	1	0	0.21	1	0	0.13	1	0	0.49	0.72	0.142668	-0.31	1	0	-0.08	1	0	-0.66	0.96	0.0177288	-0.22	1	0	-0.45	0.26	0.585027	-0.55	0.13	0.886057	-0.36	0.45	0.346787	-0.45	0.44	0.356547	-0.19	1	0	-0.34	0.72	0.142668
FBgn0032839	CG10659	-3.75	0.39	0.408935	-2.82	0.97	0.0132283	-2.94	0.32	0.49485	0.37	1	0	0.06	1	0	-0.43	1	0	0.51	1	0	-0.41	0.96	0.0177288	0.03	1	0	0.18	0.91	0.0409586	-0.07	1	0	-0.1	1	0	0.1	1	0	0.04	1	0	0.59	0.37	0.431798
FBgn0036288	CG10660	-0.08	1	0	-0.03	1	0	-0.14	1	0	0.09	1	0	0.29	0.81	0.091515	-0.23	1	0	0.00656	1	0	-0.38	0.96	0.0177288	-0.38	1	0	0.08	0.99	0.00436481	0.14	0.9	0.0457575	0.14	0.85	0.0705811	0.02	1	0	0.07	1	0	0.13	1	0
FBgn0036287	CG10663	0.11	1	0	0.25	1	0	0.14	1	0	-0.22	1	0	0.27	0.9	0.0457575	-0.49	1	0	0.05	1	0	-0.23	1	0	0.21	1	0	-0.25	0.75	0.124939	-0.16	0.96	0.0177288	-0.29	0.67	0.173925	-0.02	1	0	-0.01	1	0	0.08	1	0
FBgn0039329	CG10669	0.07	1	0	-0.09	1	0	-0.01	1	0	-0.2	1	0	-0.37	0.7	0.154902	0.04	1	0	0.12	1	0	0.25	0.96	0.0177288	0.06	1	0	-0.07	1	0	0.04	1	0	0.05	1	0	0.23	0.96	0.0177288	0.03	1	0	0.03	1	0
FBgn0035586	CG10671	-0.2	1	0	-0.15	1	0	-0.22	1	0	-0.05	1	0	0.04	1	0	-0.00239	1	0	0.08	1	0	0.08	0.98	0.00877392	0.05	1	0	0.01	1	0	-0.21	0.67	0.173925	-0.08	0.97	0.0132283	-0.03	1	0	0.05	1	0	-0.06	1	0
FBgn0035588	CG10672	0.09	1	0	0.05	1	0	-0.11	1	0	0.24	1	0	0.19	0.89	0.05061	0.11	1	0	0.08	1	0	0.1	0.98	0.00877392	0.03	1	0	-0.09	1	0	-0.04	1	0	0.05	1	0	-0.08	1	0	-0.06	1	0	-0.09	1	0
FBgn0035592	CG10674	-0.08	1	0	0.07	1	0	0.00148	1	0	-0.1	1	0	-0.11	1	0	0.01	1	0	-0.06	1	0	0.05	1	0	0.1	1	0	-0.02	1	0	-0.17	0.95	0.0222764	0.13	0.95	0.0222764	-0.05	1	0	-0.04	1	0	-0.29	0.93	0.0315171
FBgn0032836	CG10680	-0.42	1	0	-0.32	1	0	0.13	1	0	0.09	1	0	0.6	0.08	1.09691	-0.31	1	0	-0.05	1	0	-0.16	0.96	0.0177288	0.04	1	0	-0.04	1	0	-0.07	1	0	-0.11	0.95	0.0222764	0.01	1	0	-0.02	1	0	0.21	0.92	0.0362122
FBgn0036291	CG10681	0.05	1	0	0.01	1	0	0.09	1	0	-0.27	1	0	-0.23	0.9	0.0457575	-0.07	1	0	-0.19	1	0	-0.07	1	0	-0.22	1	0	-0.09	1	0	0.13	1	0	0.04	1	0	0.02	1	0	-0.14	1	0	0.19	1	0
FBgn0036300	CG10688	0.01	1	0	-0.1	1	0	-0.19	1	0	0.21	1	0	-0.04	1	0	-0.02	1	0	-0.02	1	0	0.19	0.96	0.0177288	0.18	1	0	0.02	1	0	-0.04	1	0	0.19	0.87	0.0604807	-0.18	0.94	0.0268721	-0.24	0.91	0.0409586	-0.16	1	0
FBgn0039147	CG10694	0.5	1	0	0.34	1	0	0.43	1	0	0.86	1	0	-0.00778	1	0	1.96	1	0	3.14	1	0	2.18	0.96	0.0177288	0.08	1	0	0.28	0.71	0.148742	0.23	0.86	0.0655015	0.34	0.54	0.267606	0.33	0.86	0.0655015	0.34	0.89	0.05061	0.45	0.63	0.200659
FBgn0032754	CG10700	1.41	0.49	0.309804	0.41	1	0	0.46	1	0	0.0023	1	0	-4.36	0.7	0.154902	-1.34	1	0	0.5	1	0	-3.21	0.96	0.0177288	-3.09	1	0	0.05	1	0	-0.56	0.78	0.107905	-0.39	0.88	0.0555173	-0.34	0.96	0.0177288	-0.1	1	0	0.14	1	0
FBgn0032752	CG10702	-0.35	1	0	-0.37	1	0	-0.43	1	0	-0.14	1	0	-0.38	0.44	0.356547	0.08	1	0	-0.07	1	0	0.1	0.96	0.0177288	0.04	1	0	-0.23	0.78	0.107905	-0.32	0.64	0.19382	-0.38	0.38	0.420216	0.1	0.97	0.0132283	-0.16	1	0	-0.24	0.81	0.091515
FBgn0036377	CG10710	-0.82	1	0	-1.88	1	0	-3.08	0.16	0.79588	-0.74	1	0	0.09	1	0	-1.04	1	0	-0.32	1	0	-1.26	0.92	0.0362122	-0.75	1	0	-0.64	0.52	0.283997	-0.06	1	0	-0.83	0.29	0.537602	0.07	1	0	0.3	1	0	0.21	1	0
FBgn0036360	CG10713	-0.21	1	0	-0.38	1	0	0.31	1	0	-0.12	1	0	0.61	0.84	0.0757207	-0.6	1	0	-0.15	1	0	-0.49	0.96	0.0177288	0.62	1	0	-0.11	1	0	-0.12	1	0	-0.31	0.82	0.0861861	0.1	1	0	0.15	1	0	0.02	1	0
FBgn0032846	CG10721	-0.11	1	0	0.1	1	0	-0.14	1	0	0.26	1	0	0.18	0.9	0.0457575	0.15	1	0	0.05	1	0	-0.01	1	0	0.06	1	0	-0.1	1	0	0.06	1	0	-0.13	0.94	0.0268721	-0.22	0.96	0.0177288	-0.17	1	0	0.00825	1	0
FBgn0036362	CG10725	-1.1	0.1	1	-0.98	0.27	0.568636	-1.23	0.02	1.69897	-0.6	1	0	-0.09	1	0	-1.12	0.16	0.79588	-0.89	1	0	-1.13	0.24	0.619789	-1.31	0.31	0.508638	-1.22	4.38e-05	4.35853	-0.72	0.07	1.1549	-1.5	2.79e-07	6.5544	-1.05	0.22	0.657577	-0.89	0.46	0.337242	-1.77	0.00389	2.41005
FBgn0032843	CG10730	0.17	1	0	-0.15	1	0	0.02	1	0	0.54	1	0	0.77	0.84	0.0757207	-0.03	1	0	0.32	1	0	0.59	0.96	0.0177288	-0.6	1	0	-0.1	0.97	0.0132283	-0.15	0.92	0.0362122	-0.06	1	0	-0.26	0.88	0.0555173	-0.6	0.17	0.769551	-0.3	0.83	0.0809219
FBgn0034081	CG10731	0.23	1	0	0.39	1	0	0.2	1	0	-0.12	1	0	-0.05	1	0	0.07	1	0	-0.25	1	0	0.1	1	0	0.08	1	0	0.16	0.87	0.0604807	0.29	0.61	0.21467	0.2	0.78	0.107905	0.03	1	0	0.2	1	0	0.22	1	0
FBgn0036365	CG10732	0.09	1	0	0.07	1	0	0.14	1	0	-0.17	1	0	0.14	0.9	0.0457575	-0.13	1	0	0.03	1	0	-0.08	0.99	0.00436481	0.06	1	0	0.12	0.91	0.0409586	0.2	0.69	0.161151	-0.03	1	0	0.19	0.78	0.107905	0.1	1	0	0.14	1	0
FBgn0034082	CG10734	0.87	0.46	0.337242	0.65	1	0	1.03	0.18	0.744727	0.25	1	0	-0.76	0.9	0.0457575	-0.12	1	0	-0.72	1	0	0.73	0.97	0.0132283	-1.07	1	0	0.38	0.4	0.39794	0.42	0.35	0.455932	0.41	0.3	0.522879	0.27	0.88	0.0555173	0.31	0.86	0.0655015	0.42	0.54	0.267606
FBgn0034420	CG10737	-0.05	1	0	-0.03	1	0	-0.16	1	0	-0.02	1	0	0.29	0.67	0.173925	-0.14	1	0	0.04	1	0	-0.2	0.96	0.0177288	-0.06	1	0	-0.1	0.96	0.0177288	-0.04	1	0	-0.19	0.78	0.107905	-0.18	0.91	0.0409586	-0.02	1	0	-0.08	1	0
FBgn0036368	CG10738	-1.33	0.39	0.408935	-0.76	1	0	-1.08	0.44	0.356547	-0.46	1	0	-0.22	0.9	0.0457575	-0.25	1	0	-0.08	1	0	-0.15	0.96	0.0177288	-0.17	1	0	-0.14	1	0	0.09	1	0	-0.04	1	0	0.58	0.81	0.091515	0.03	1	0	0.05	1	0
FBgn0037250	CG1074	-0.11	1	0	-0.15	1	0	-0.17	1	0	-0.12	1	0	-0.17	0.84	0.0757207	0.06	1	0	0.03	1	0	0.21	0.96	0.0177288	0.13	1	0	-0.26	0.73	0.136677	0.16	0.96	0.0177288	-0.16	0.91	0.0409586	0.27	0.94	0.0268721	0.01	1	0	-0.19	1	0
FBgn0032845	CG10747	-0.19	1	0	0.03	1	0	-0.3	1	0	0.14	1	0	0.15	0.93	0.0315171	0.03	1	0	0.13	1	0	0.04	1	0	0.11	1	0	0.02	1	0	-0.01	1	0	0.0017	1	0	-0.07	1	0	-0.12	1	0	-0.07	1	0
FBgn0036327	CG10748	0.51	1	0	0.6	1	0	0.37	1	0	0.03	1	0	3.23	0.84	0.0757207	0.05	1	0	3.14	1	0	2.18	0.96	0.0177288	0.08	1	0	0.48	0.27	0.568636	0.41	0.5	0.30103	0.36	0.53	0.275724	0.12	1	0	0.33	0.95	0.0222764	0.4	0.79	0.102373
FBgn0036328	CG10749	0.94	0.44	0.356547	0.54	1	0	1.16	0.14	0.853872	2.41	1	0	3.23	0.84	0.0757207	2.31	1	0	2.28	1	0	2.18	0.96	0.0177288	0.08	1	0	0.28	0.39	0.408935	0.32	0.32	0.49485	0.43	0.05	1.30103	0.06	1	0	0.16	1	0	0.27	0.81	0.091515
FBgn0032769	CG10750	0.98	0.37	0.431798	0.68	1	0	0.97	0.24	0.619789	0.03	1	0	2.39	0.9	0.0457575	0.05	1	0	3.14	1	0	-0.04	1	0	0.08	1	0	0.56	0.08	1.09691	0.44	0.33	0.481486	0.51	0.14	0.853872	0.3	0.79	0.102373	0.43	0.48	0.318759	0.48	0.32	0.49485
FBgn0036325	CG10752	1.04	0.64	0.19382	0.77	1	0	1.13	0.38	0.420216	-0.85	1	0	-0.02	1	0	-0.11	1	0	-0.04	1	0	0.69	1	0	-2.24	1	0	0.06	1	0	0.01	1	0	0.00737	1	0	0.04	1	0	0.2	1	0	0.16	1	0
FBgn0036314	CG10754	-0.11	1	0	-0.08	1	0	-0.02	1	0	-0.00668	1	0	0.17	0.9	0.0457575	0.23	1	0	0.03	1	0	0.08	1	0	0.0041	1	0	0.05	1	0	-0.03	1	0	-0.1	1	0	0.18	0.97	0.0132283	-0.22	1	0	-0.02	1	0
FBgn0030015	CG10761	0.91	0.93	0.0315171	0.83	1	0	1.1	0.52	0.283997	-0.53	1	0	-1.4	0.9	0.0457575	-0.65	1	0	1.35	1	0	1.61	0.96	0.0177288	1.55	1	0	0.21	0.78	0.107905	0.08	1	0	0.18	0.87	0.0604807	0.16	0.96	0.0177288	0.34	0.7	0.154902	0.38	0.55	0.259637
FBgn0034221	CG10764	-0.15	1	0	-0.44	1	0	-0.12	1	0	0.19	1	0	0.15	1	0	-0.34	1	0	-2.76	1	0	-1.12	0.96	0.0177288	-2.56	1	0	-0.6	0.94	0.0268721	-1.18	0.72	0.142668	-1.74	0.4	0.39794	-0.82	0.84	0.0757207	-0.73	0.97	0.0132283	-0.54	1	0
FBgn0037405	CG1077	0.64	1	0	1.05	1	0	1.21	0.82	0.0861861	-1.63	0.02	1.69897	-0.72	0.6	0.221849	0.57	1	0	0.06	1	0	0.67	0.41	0.387216	-0.07	1	0	-0.16	1	0	0.41	0.92	0.0362122	0.37	0.93	0.0315171	2.3	0.03	1.52288	0.71	0.99	0.00436481	0.00747	1	0
FBgn0029979	CG10777	-0.17	1	0	0.01	1	0	0.04	1	0	-0.01	1	0	-0.13	0.9	0.0457575	0.13	1	0	-0.04	1	0	0.07	1	0	0.00715	1	0	0.09	0.96	0.0177288	-0.03	1	0	-0.02	1	0	0.16	0.95	0.0222764	0.09	1	0	-0.08	1	0
FBgn0029980	CG10778	0.03	1	0	-0.09	1	0	-0.04	1	0	-0.07	1	0	-0.13	0.93	0.0315171	0.32	1	0	-0.07	1	0	0.15	0.96	0.0177288	0.13	1	0	-0.02	1	0	-0.34	0.64	0.19382	-0.21	0.85	0.0705811	0.05	1	0	0.00932	1	0	-0.1	1	0
FBgn0029656	CG10793	1.02	0.5	0.30103	0.94	1	0	0.93	0.44	0.356547	0.57	1	0	0.27	1	0	-0.31	1	0	-1.8	1	0	0.61	0.98	0.00877392	0.17	1	0	0.31	0.69	0.161151	0.21	0.9	0.0457575	0.27	0.77	0.113509	0.33	0.92	0.0362122	0.35	0.98	0.00877392	0.4	0.89	0.05061
FBgn0034626	CG10795	-0.33	1	0	-0.25	1	0	-0.07	1	0	-0.31	1	0	-0.34	0.8	0.09691	0.15	1	0	-0.08	1	0	-0.03	1	0	-0.18	1	0	-0.29	0.83	0.0809219	-0.78	0.14	0.853872	-0.32	0.79	0.102373	0.04	1	0	-0.11	1	0	-0.41	0.99	0.00436481
FBgn0033821	CG10799	0.19	1	0	0.58	1	0	-0.03	1	0	0.09	1	0	0.52	0.38	0.420216	-0.35	1	0	-0.49	1	0	-0.8	0.19	0.721246	-0.43	1	0	-0.16	0.78	0.107905	-0.24	0.59	0.229148	-0.13	0.88	0.0555173	-0.52	0.38	0.420216	-0.43	0.64	0.19382	-0.34	0.82	0.0861861
FBgn0029660	CG10801	0.47	1	0	0.37	1	0	0.77	0.79	0.102373	-0.13	1	0	0.31	0.92	0.0362122	-0.22	1	0	0.34	1	0	-0.66	0.96	0.0177288	0.84	1	0	0.14	0.96	0.0177288	0.33	0.71	0.148742	0.17	0.94	0.0268721	0.24	0.96	0.0177288	0.27	1	0	0.32	1	0
FBgn0029664	CG10802	-0.17	1	0	-0.3	1	0	-0.12	1	0	-0.21	1	0	-0.11	0.99	0.00436481	-0.00909	1	0	0.03	1	0	0.13	0.96	0.0177288	0.14	1	0	-0.21	0.86	0.0655015	0.1	1	0	-0.55	0.15	0.823909	0.05	1	0	0.22	0.98	0.00877392	0.1	1	0
FBgn0029666	CG10803	-0.14	1	0	-0.17	1	0	0.03	1	0	-0.00173	1	0	-0.13	0.9	0.0457575	0.11	1	0	-0.07	1	0	0.04	1	0	-0.05	1	0	0.22	0.78	0.107905	0.15	0.95	0.0222764	-0.02	1	0	0.27	0.83	0.0809219	0.00355	1	0	0.01	1	0
FBgn0029663	CG10804	0.21	1	0	0.25	1	0	-0.16	1	0	0.33	1	0	0.56	0.53	0.275724	-0.17	1	0	2.09e-05	1	0	-0.35	0.96	0.0177288	-0.23	1	0	0.07	1	0	0.07	1	0	-0.21	0.86	0.0655015	0.07	1	0	0.09	1	0	0.08	1	0
FBgn0036052	CG10809	0.21	1	0	0.11	1	0	0.13	1	0	-0.02	1	0	-0.1	1	0	0.07	1	0	-0.01	1	0	0.15	0.96	0.0177288	-0.04	1	0	0.17	0.92	0.0362122	0.16	0.95	0.0222764	0.14	0.94	0.0268721	0.19	0.94	0.0268721	0.13	1	0	0.08	1	0
FBgn0033830	CG10814	-0.5	1	0	4.13	0.01	2	0.05	1	0	-0.39	1	0	-0.04	1	0	-1.05	1	0	-0.03	1	0	-0.15	1	0	-0.69	1	0	-0.17	1	0	-2.47	0.96	0.0177288	-2.41	0.94	0.0268721	-0.01	1	0	-2.21	1	0	1.8	1	0
FBgn0034478	CG10822	1.1	0.35	0.455932	0.87	1	0	1.3	0.11	0.958607	0.03	1	0	2.39	0.9	0.0457575	0.05	1	0	#N/A	#N/A	#N/A	#N/A	#N/A	#N/A	#N/A	#N/A	#N/A	0.79	0.000517	3.28651	0.58	0.04	1.39794	0.75	0.00156	2.80688	0.34	0.67	0.173925	0.46	0.35	0.455932	0.34	0.66	0.180456
FBgn0038865	CG10824	-1.05	0.45	0.346787	-0.6	1	0	-1.54	0.05	1.30103	-0.21	1	0	-0.05	1	0	-0.84	0.05	1.30103	-0.55	1	0	-0.77	0.39	0.408935	-0.39	1	0	0.07	0.99	0.00436481	-0.5	0.02	1.69897	0.32	0.23	0.638272	-0.85	1.66e-08	7.77989	-0.62	0.000185	3.73283	-0.26	0.44	0.356547
FBgn0038845	CG10827	-0.7	0.65	0.187087	-0.57	1	0	-1.04	0.14	0.853872	0.39	1	0	0.22	0.87	0.0604807	-0.2	1	0	-0.00866	1	0	-0.47	0.75	0.124939	-0.2	1	0	0.51	0.29	0.537602	-0.13	0.99	0.00436481	0.09	1	0	-0.1	1	0	-0.09	1	0	0.02	1	0
FBgn0038839	CG10830	0.1	1	0	0.01	1	0	0.13	1	0	-0.07	1	0	0.36	0.69	0.161151	-0.59	0.75	0.124939	0.24	1	0	-0.23	0.96	0.0177288	-0.06	1	0	0.01	1	0	0.14	0.96	0.0177288	-0.11	0.95	0.0222764	-0.000301	1	0	-0.01	1	0	0.1	1	0
FBgn0032972	CG10834	1.42	0.39	0.408935	0.85	1	0	1.66	0.13	0.886057	2.09	1	0	0.83	1	0	-2.35	1	0	3.14	1	0	-0.04	1	0	2.48	1	0	0.66	0.06	1.22185	0.46	0.42	0.376751	0.62	0.1	1	0.24	0.96	0.0177288	0.41	0.83	0.0809219	0.65	0.32	0.49485
FBgn0028858	CG10839	0.69	1	0	0.49	1	0	0.69	0.82	0.0861861	0.03	1	0	0.13	1	0	2.31	1	0	-0.07	1	0	-0.04	1	0	2.48	1	0	0.2	0.9	0.0457575	0.32	0.72	0.142668	0.37	0.53	0.275724	0.21	0.92	0.0362122	0.36	0.65	0.187087	0.46	0.34	0.468521
FBgn0038163	CG10841	0.72	0.82	0.0861861	0.61	1	0	0.94	0.34	0.468521	-0.37	1	0	-0.41	1	0	0.67	1	0	2.28	1	0	2.18	0.96	0.0177288	2.48	1	0	0.26	0.49	0.309804	0.25	0.59	0.229148	0.33	0.26	0.585027	0.22	0.63	0.200659	0.26	0.51	0.29243	0.36	0.12	0.920819
FBgn0039246	CG10845	1	0.36	0.443697	0.64	1	0	1.26	0.07	1.1549	1.39	1	0	-0.00776	1	0	1.27	1	0	-3.24	1	0	-3.21	0.96	0.0177288	-3.09	1	0	0.09	0.96	0.0177288	0.17	0.79	0.102373	0.25	0.42	0.376751	0.08	0.98	0.00877392	0.25	0.57	0.244125	0.39	0.08	1.09691
FBgn0035478	CG10853	2.28	1	0	0.13	1	0	2.27	1	0	#N/A	#N/A	#N/A	#N/A	#N/A	#N/A	#N/A	#N/A	#N/A	#N/A	#N/A	#N/A	#N/A	#N/A	#N/A	#N/A	#N/A	#N/A	#N/A	#N/A	#N/A	#N/A	#N/A	#N/A	#N/A	#N/A	#N/A	-0.03	1	0	3.31	0.98	0.00877392	-0.00902	1	0
FBgn0032520	CG10859	1.06	0.21	0.677781	0.85	0.76	0.119186	1.15	0.07	1.1549	-0.25	1	0	-0.29	1	0	-0.38	1	0	-1.41	1	0	-0.16	1	0	0.56	1	0	0.54	0.03	1.52288	0.47	0.11	0.958607	0.62	0.00652	2.18575	0.4	0.45	0.346787	0.49	0.25	0.60206	0.62	0.05	1.30103
FBgn0035455	CG10862	0.68	0.7	0.154902	0.48	1	0	0.85	0.29	0.537602	0.00289	1	0	-3.66	0.79	0.102373	-0.12	1	0	-2.39	1	0	-2.36	0.96	0.0177288	-2.24	1	0	0.29	0.58	0.236572	0.31	0.6	0.221849	0.45	0.18	0.744727	0.15	0.97	0.0132283	0.31	0.87	0.0604807	0.36	0.71	0.148742
FBgn0027552	CG10863	-0.29	1	0	-0.13	1	0	-0.52	0.64	0.19382	-0.00435	1	0	0.09	0.99	0.00436481	-0.06	1	0	-0.08	1	0	-0.15	0.96	0.0177288	-0.1	1	0	-0.000932	1	0	-0.03	1	0	0.02	1	0	-0.07	1	0	-0.03	1	0	0.00488	1	0
FBgn0038621	CG10864	0.12	1	0	0.13	1	0	0.03	1	0	0.11	1	0	0.36	0.9	0.0457575	-0.51	1	0	0.1	1	0	-0.23	1	0	-0.42	1	0	0.16	1	0	0.46	0.79	0.102373	0.57	0.56	0.251812	-0.31	0.96	0.0177288	-0.14	1	0	-0.25	1	0
FBgn0035475	CG10866	0.06	1	0	0.16	1	0	-0.11	1	0	-0.34	1	0	-0.38	0.67	0.173925	0.14	1	0	-0.02	1	0	0.23	0.96	0.0177288	0.01	1	0	-0.12	0.96	0.0177288	-0.02	1	0	-0.07	1	0	0.23	0.91	0.0409586	0.11	1	0	0.01	1	0
FBgn0031347	CG10869	0.8	0.53	0.275724	0.54	1	0	0.82	0.35	0.455932	0.00142	1	0	0.2	1	0	0.16	1	0	-0.71	1	0	0.52	0.96	0.0177288	-0.34	1	0	0.24	0.76	0.119186	0.17	0.93	0.0315171	0.3	0.58	0.236572	0.21	0.87	0.0604807	0.29	0.68	0.167491	0.4	0.3	0.522879
FBgn0031395	CG10874	-0.16	1	0	-0.11	1	0	-0.03	1	0	-0.11	1	0	-0.21	0.84	0.0757207	-0.00231	1	0	0.05	1	0	0.15	0.96	0.0177288	-0.01	1	0	-0.12	0.97	0.0132283	-0.3	0.71	0.148742	-0.09	1	0	-0.09	1	0	-0.19	1	0	-0.06	1	0
FBgn0038804	CG10877	0.27	1	0	0.53	1	0	-0.00904	1	0	0.02	1	0	0.09	1	0	-0.04	1	0	0.22	1	0	-0.08	1	0	0.13	1	0	0.34	0.54	0.267606	-0.06	1	0	0.26	0.72	0.142668	-0.03	1	0	-0.15	1	0	0.05	1	0
FBgn0031398	CG10880	0.19	1	0	-0.02	1	0	-0.000924	1	0	-0.16	1	0	-0.3	0.72	0.142668	0.11	1	0	0.06	1	0	0.35	0.75	0.124939	0.2	1	0	-0.00303	1	0	-0.07	1	0	0.16	0.99	0.00436481	0.81	0.5	0.30103	0.25	1	0	0.12	1	0
FBgn0038796	CG10881	0.78	0.62	0.207608	0.62	1	0	0.98	0.24	0.619789	0.03	1	0	3.76	0.8	0.09691	0.06	1	0	2.28	1	0	-0.04	1	0	2.48	1	0	0.22	0.76	0.119186	0.14	0.96	0.0177288	0.27	0.61	0.21467	0.32	0.88	0.0555173	0.38	0.84	0.0757207	0.51	0.53	0.275724
FBgn0038773	CG10887	0.57	1	0	0.76	1	0	0.84	0.55	0.259637	-3.23	1	0	-0.86	1	0	-0.11	1	0	-2.39	1	0	1.61	0.96	0.0177288	-2.24	1	0	0.54	0.16	0.79588	0.41	0.5	0.30103	0.45	0.32	0.49485	0.26	0.92	0.0362122	0.21	1	0	0.28	0.97	0.0132283
FBgn0038769	CG10889	0.02	1	0	0.13	1	0	0.03	1	0	-0.38	1	0	-0.27	0.81	0.091515	0.11	1	0	0.06	1	0	0.22	0.96	0.0177288	0.17	1	0	-0.49	0.54	0.267606	-0.06	1	0	-0.14	0.99	0.00436481	0.33	0.96	0.0177288	0.24	1	0	-0.17	1	0
FBgn0037911	CG10898	-0.33	1	0	-0.00383	1	0	-0.34	1	0	-0.31	1	0	-0.19	0.9	0.0457575	-0.00593	1	0	-0.02	1	0	0.17	0.96	0.0177288	0.1	1	0	-0.32	0.6	0.221849	-0.02	1	0	-0.33	0.56	0.251812	-0.1	1	0	-0.16	1	0	0.02	1	0
FBgn0039235	CG10899	0.73	1	0	0.43	1	0	0.77	0.76	0.119186	-2.38	1	0	-2.27	0.9	0.0457575	-0.1	1	0	2.28	1	0	3.01	0.96	0.0177288	0.08	1	0	0.17	0.89	0.05061	0.23	0.78	0.107905	0.28	0.58	0.236572	0.13	0.98	0.00877392	0.32	0.8	0.09691	0.58	0.14	0.853872
FBgn0037238	CG1090	0.01	1	0	-0.14	1	0	-0.11	1	0	0.31	1	0	0.62	0.3	0.522879	-0.06	1	0	-0.04	1	0	-0.35	0.96	0.0177288	-0.34	1	0	0.01	1	0	-0.00938	1	0	-0.09	0.96	0.0177288	-0.12	0.99	0.00436481	0.02	1	0	-0.07	1	0
FBgn0037543	CG10903	-0.31	1	0	-0.16	1	0	-0.08	1	0	0.16	1	0	0.08	1	0	0.07	1	0	0.04	1	0	0.01	1	0	0.09	1	0	0.03	1	0	0.12	0.98	0.00877392	0.13	0.96	0.0177288	0.24	0.96	0.0177288	-0.09	1	0	0.09	1	0
FBgn0034945	CG10904	0.02	1	0	0.04	1	0	0.12	1	0	-0.19	1	0	-0.24	0.85	0.0705811	0.06	1	0	0.1	1	0	0.25	0.96	0.0177288	0.21	1	0	-0.07	1	0	-0.05	1	0	-0.01	1	0	0.11	1	0	-0.00426	1	0	-0.07	1	0
FBgn0036207	CG10907	0.2	1	0	0.16	1	0	0.21	1	0	0.13	1	0	-0.12	0.99	0.00436481	0.08	1	0	0.05	1	0	0.16	0.96	0.0177288	-0.05	1	0	-0.06	1	0	0.11	0.96	0.0177288	0.07	1	0	0.04	1	0	-0.11	1	0	-0.12	1	0
FBgn0038090	CG10909	0.84	0.83	0.0809219	0.59	1	0	0.7	0.83	0.0809219	1.39	1	0	0.83	1	0	-2.35	1	0	-3.77	1	0	-3.74	0.96	0.0177288	-3.62	1	0	-0.27	0.9	0.0457575	0.1	1	0	0.13	1	0	0.23	0.99	0.00436481	0.66	0.71	0.148742	0.45	0.97	0.0132283
FBgn0037470	CG1091	-0.13	1	0	-0.07	1	0	-0.1	1	0	-0.1	1	0	-0.22	0.81	0.091515	0.11	1	0	0.03	1	0	0.15	0.96	0.0177288	0.06	1	0	-0.04	1	0	0.07	1	0	0.07	1	0	0.1	1	0	0.02	1	0	0.08	1	0
FBgn0034289	CG10910	-1.72	0.01	2	-1.17	0.36	0.443697	-2.79	5.13e-08	7.28988	1.15	3.55e-05	4.44977	0.21	0.84	0.0757207	-0.02	1	0	0.33	1	0	-0.85	0.14	0.853872	-0.07	1	0	0.77	0.00395	2.4034	0.08	1	0	-0.31	0.59	0.229148	-0.13	1	0	0.44	0.84	0.0757207	1.19	0.00875	2.05799
FBgn0034295	CG10911	-2.09	8e-06	5.09691	-2.05	1.54e-05	4.81248	-2.26	3.72e-07	6.42946	0.39	1	0	0.3	0.76	0.119186	0.2	1	0	0.38	1	0	-0.24	0.96	0.0177288	-0.07	1	0	0.62	0.04	1.39794	0.13	0.97	0.0132283	0.02	1	0	0.1	1	0	0.66	0.04	1.39794	0.72	0.02	1.69897
FBgn0034296	CG10912	-1.17	0.14	0.853872	-1.18	0.14	0.853872	-1.02	0.15	0.823909	0.59	0.44	0.356547	0.3	0.75	0.124939	-0.13	1	0	1.08	0.16	0.79588	0.08	1	0	0.17	1	0	0.82	0.02	1.69897	0.27	0.85	0.0705811	-0.3	0.75	0.124939	0.3	0.93	0.0315171	1.27	0.00339	2.4698	1.36	0.00121	2.91721
FBgn0034307	CG10914	0.46	1	0	0.11	1	0	0.52	0.94	0.0268721	0.07	1	0	0.14	0.97	0.0132283	0.21	1	0	0.18	1	0	0.12	1	0	0.07	1	0	-0.09	1	0	-0.05	1	0	-0.15	1	0	0.11	1	0	-0.08	1	0	-0.04	1	0
FBgn0034308	CG10915	-0.16	1	0	-0.05	1	0	-0.02	1	0	-0.04	1	0	-0.08	1	0	0.13	1	0	-0.09	1	0	0.04	1	0	0.0091	1	0	-0.17	0.89	0.05061	-0.14	0.96	0.0177288	-0.08	1	0	-0.000384	1	0	-0.2	1	0	-0.19	1	0
FBgn0034312	CG10916	0.05	1	0	0.19	1	0	0.15	1	0	-0.14	1	0	0.11	1	0	-0.21	1	0	0.03	1	0	-0.08	1	0	-0.18	1	0	-0.11	0.98	0.00877392	-0.08	1	0	-0.08	1	0	-0.16	0.98	0.00877392	-0.17	1	0	-0.03	1	0
FBgn0031178	CG10918	1.74	0.03	1.52288	1.74	0.03	1.52288	1.23	0.18	0.744727	0.03	1	0	2.39	0.9	0.0457575	0.05	1	0	-0.04	1	0	-2.36	0.96	0.0177288	-2.24	1	0	-1.03	0.98	0.00877392	0.72	1	0	0.43	1	0	3.11	0.92	0.0362122	4.79	0.73	0.136677	3.7	0.93	0.0315171
FBgn0037514	CG10919	0.53	1	0	0.4	1	0	0.8	0.58	0.236572	0.03	1	0	2.39	0.9	0.0457575	0.05	1	0	-0.88	1	0	-3.21	0.96	0.0177288	-3.09	1	0	0.68	0.0086	2.0655	0.49	0.17	0.769551	0.58	0.05	1.30103	0.38	0.48	0.318759	0.29	0.78	0.107905	0.41	0.4	0.39794
FBgn0037228	CG1092	-0.22	1	0	-0.28	1	0	-0.39	0.78	0.107905	0.3	1	0	0.48	0.53	0.275724	-0.16	1	0	-0.11	1	0	-0.62	0.87	0.0604807	-0.3	1	0	-0.24	0.55	0.259637	-0.16	0.86	0.0655015	0.00384	1	0	-0.43	0.37	0.431798	-0.46	0.31	0.508638	-0.19	1	0
FBgn0029963	CG10920	0.58	1	0	0.26	1	0	0.62	0.78	0.107905	2.41	1	0	2.39	0.9	0.0457575	2.31	1	0	-0.07	1	0	3.01	0.96	0.0177288	0.08	1	0	0.39	0.2	0.69897	0.4	0.24	0.619789	0.49	0.06	1.22185	0.24	0.88	0.0555173	0.25	0.91	0.0409586	0.41	0.42	0.376751
FBgn0034356	CG10924	0.55	0.6	0.221849	0.51	1	0	0.29	1	0	0.43	1	0	0.61	0.38	0.420216	-0.24	1	0	0.04	1	0	-0.39	0.96	0.0177288	-0.15	1	0	0.06	1	0	-0.12	1	0	-0.15	0.94	0.0268721	0.02	1	0	-0.13	1	0	-0.2	1	0
FBgn0034360	CG10927	-0.02	1	0	0.34	1	0	-0.55	1	0	-0.01	1	0	-0.33	0.79	0.102373	0.04	1	0	0.23	1	0	0.32	0.96	0.0177288	0.23	1	0	0.13	1	0	0.34	0.94	0.0268721	0.15	1	0	0.4	0.96	0.0177288	0.15	1	0	0.17	1	0
FBgn0034274	CG10931	0.49	1	0	0.8	1	0	0.68	0.81	0.091515	2.41	1	0	0.13	1	0	2.31	1	0	-2.39	1	0	-2.36	0.96	0.0177288	0.16	1	0	0.69	0.11	0.958607	0.45	0.56	0.251812	0.46	0.45	0.346787	0.23	0.97	0.0132283	0.25	1	0	0.39	0.97	0.0132283
FBgn0029969	CG10932	-0.33	1	0	-0.08	1	0	-0.72	0.39	0.408935	0.33	0.97	0.0132283	0.09	0.97	0.0132283	0.35	1	0	0.1	1	0	0.19	0.96	0.0177288	0.26	1	0	-0.16	0.91	0.0409586	-0.24	0.77	0.113509	-0.23	0.73	0.136677	-0.1	1	0	-0.09	1	0	-0.17	1	0
FBgn0034264	CG10933	-0.03	1	0	0.08	1	0	0.1	1	0	0.49	1	0	1.04	0.57	0.244125	0.22	1	0	0.5	1	0	0.18	1	0	-0.4	1	0	-0.38	0.86	0.0655015	-0.54	0.76	0.119186	-0.07	1	0	0.08	1	0	0.29	1	0	-0.21	1	0
FBgn0034263	CG10934	0.83	0.46	0.337242	0.6	1	0	0.96	0.19	0.721246	0.00577	1	0	0.83	1	0	-0.1	1	0	-2.39	1	0	1.22	0.96	0.0177288	-2.24	1	0	0.36	0.16	0.79588	0.26	0.53	0.275724	0.57	0.0022	2.65758	0.38	0.5	0.30103	0.39	0.49	0.309804	0.44	0.31	0.508638
FBgn0034253	CG10936	-0.25	1	0	0.03	1	0	-0.3	1	0	0.15	1	0	0.44	0.59	0.229148	0.06	1	0	0.55	1	0	0.000944	1	0	0.11	1	0	-0.1	1	0	-0.12	0.99	0.00436481	-0.35	0.58	0.236572	-0.19	0.99	0.00436481	0.19	1	0	-0.16	1	0
FBgn0036320	CG10943	-0.31	1	0	-1.41	0.04	1.39794	-0.67	0.54	0.267606	1.27	0.000405	3.39254	0.18	0.93	0.0315171	0.7	0.52	0.283997	1.16	0.15	0.823909	-0.23	0.96	0.0177288	0.77	1	0	1.64	6.96e-10	9.15739	0.55	0.35	0.455932	1.24	2.62e-05	4.5817	0.68	0.08	1.09691	-0.11	1	0	0.55	0.27	0.568636
FBgn0032857	CG10947	0.42	1	0	0.29	1	0	0.49	0.72	0.142668	0.14	1	0	0.58	0.38	0.420216	-0.28	1	0	-0.13	1	0	-0.65	0.84	0.0757207	-0.3	1	0	-0.11	0.92	0.0362122	-0.02	1	0	-0.08	0.97	0.0132283	-0.11	0.96	0.0177288	0.16	0.93	0.0315171	0.19	0.79	0.102373
FBgn0036317	CG10948	-0.06	1	0	-0.04	1	0	-0.02	1	0	-0.04	1	0	-0.15	0.9	0.0457575	-0.04	1	0	-0.05	1	0	-0.05	1	0	-0.00114	1	0	0.03	1	0	0.05	1	0	-0.1	0.94	0.0268721	0.11	0.99	0.00436481	-0.06	1	0	-0.03	1	0
FBgn0032858	CG10949	0.06	1	0	-0.06	1	0	-0.11	1	0	-0.33	1	0	-0.46	0.48	0.318759	0.02	1	0	-0.13	1	0	0.17	0.96	0.0177288	0.05	1	0	0.08	1	0	0.19	0.96	0.0177288	0.13	0.98	0.00877392	0.25	0.96	0.0177288	0.09	1	0	0.05	1	0
FBgn0034205	CG10950	0.97	0.39	0.408935	0.74	1	0	1.04	0.19	0.721246	2.41	1	0	0.13	1	0	2.31	1	0	#N/A	#N/A	#N/A	#N/A	#N/A	#N/A	#N/A	#N/A	#N/A	0.37	0.45	0.346787	0.33	0.62	0.207608	0.35	0.46	0.337242	0.36	0.57	0.244125	0.34	0.67	0.173925	0.49	0.23	0.638272
FBgn0034204	CG10953	-4.99	0.03	1.52288	-8	0.38	0.420216	-5.84	0.02	1.69897	#N/A	#N/A	#N/A	#N/A	#N/A	#N/A	#N/A	#N/A	#N/A	0.31	1	0	-1.39	0.96	0.0177288	-0.39	1	0	-0.09	1	0	2.2	0.97	0.0132283	-0.03	1	0	#N/A	#N/A	#N/A	#N/A	#N/A	#N/A	#N/A	#N/A	#N/A
FBgn0030004	CG10958	0.64	0.69	0.161151	0.25	1	0	0.45	0.89	0.05061	0.32	1	0	0.28	0.9	0.0457575	0.00319	1	0	0.31	1	0	-0.06	1	0	0.14	1	0	0.22	0.62	0.207608	0.12	0.93	0.0315171	0.37	0.17	0.769551	0.16	0.96	0.0177288	0.31	0.72	0.142668	0.46	0.24	0.619789
FBgn0030010	CG10959	-0.16	1	0	-0.52	1	0	-0.22	1	0	-0.38	1	0	-0.5	0.46	0.337242	0.09	1	0	-0.07	1	0	0.27	0.96	0.0177288	0.06	1	0	0.08	1	0	0.02	1	0	0.07	1	0	0.9	0.26	0.585027	0.38	1	0	0.29	1	0
FBgn0036316	CG10960	-0.06	1	0	-0.37	1	0	-0.15	1	0	-0.07	1	0	-0.06	1	0	0.00479	1	0	-0.06	1	0	0.17	0.96	0.0177288	-0.09	1	0	-0.37	0.5	0.30103	-0.54	0.2	0.69897	-0.39	0.42	0.376751	-0.08	1	0	-0.19	0.98	0.00877392	-0.39	0.38	0.420216
FBgn0030073	CG10962	-0.12	1	0	0.11	1	0	-0.37	0.97	0.0132283	-0.26	1	0	-0.38	0.83	0.0809219	0.02	1	0	-0.14	1	0	-0.19	0.99	0.00436481	-0.24	1	0	-0.33	0.82	0.0861861	-0.27	0.91	0.0409586	-0.21	0.94	0.0268721	0.06	1	0	0.03	1	0	0.17	1	0
FBgn0036310	CG10969	1.04	0.5	0.30103	0.89	1	0	1.18	0.23	0.638272	-0.85	1	0	-0.86	0.99	0.00436481	-0.11	1	0	-3.77	1	0	-1.52	0.96	0.0177288	-3.62	1	0	0.07	1	0	0.24	0.82	0.0861861	0.24	0.78	0.107905	0.15	0.96	0.0177288	0.17	1	0	0.27	0.85	0.0705811
FBgn0030078	CG10970	0.57	1	0	0.12	1	0	0.57	1	0	0.45	1	0	0.43	0.97	0.0132283	0.5	1	0	-0.16	1	0	-0.1	1	0	-0.28	1	0	-0.27	0.81	0.091515	0.09	1	0	0.00393	1	0	-0.22	0.96	0.0177288	-0.36	0.95	0.0222764	0.02	1	0
FBgn0036306	CG10973	-0.03	1	0	-0.04	1	0	0.03	1	0	-0.14	1	0	-0.17	0.9	0.0457575	-0.05	1	0	-0.03	1	0	0.05	1	0	-0.04	1	0	-0.11	0.99	0.00436481	0.21	0.87	0.0604807	0.06	1	0	0.28	0.89	0.05061	-0.05	1	0	0.13	1	0
FBgn0037379	CG10979	-0.03	1	0	-0.04	1	0	-0.2	1	0	-0.02	1	0	-0.21	0.8	0.09691	0.17	1	0	0.01	1	0	0.11	0.96	0.0177288	0.04	1	0	0.12	0.92	0.0362122	0.14	0.89	0.05061	0.14	0.87	0.0604807	0.33	0.74	0.130768	-0.02	1	0	0.01	1	0
FBgn0036305	CG10984	-0.16	1	0	-0.13	1	0	-0.03	1	0	-0.1	1	0	-0.14	0.9	0.0457575	0.19	1	0	-0.03	1	0	0.16	0.96	0.0177288	0.08	1	0	0.11	0.97	0.0132283	0.1	1	0	0.08	1	0	0.15	0.96	0.0177288	0.04	1	0	0.04	1	0
FBgn0030524	CG10993	0.34	1	0	0.41	1	0	0.4	1	0	3.79	1	0	2.39	0.9	0.0457575	2.31	1	0	-2.39	1	0	-2.36	0.96	0.0177288	0.16	1	0	-0.22	1	0	-0.12	1	0	-0.000181	1	0	0.22	1	0	0.31	1	0	0.2	1	0
FBgn0030525	CG10996	0.84	0.93	0.0315171	0.19	1	0	0.71	0.89	0.05061	0.03	1	0	2.39	0.9	0.0457575	0.05	1	0	#N/A	#N/A	#N/A	#N/A	#N/A	#N/A	#N/A	#N/A	#N/A	0.23	0.84	0.0757207	0.27	0.8	0.09691	0.39	0.44	0.356547	0.22	0.95	0.0222764	0.18	1	0	0.23	1	0
FBgn0263353	CG11000	-0.38	1	0	-0.00272	1	0	-0.5	1	0	0.2	1	0	0.51	0.45	0.346787	-0.11	1	0	-0.02	1	0	-0.57	0.93	0.0315171	-0.13	1	0	-0.14	0.9	0.0457575	-0.1	0.97	0.0132283	-0.19	0.79	0.102373	-0.21	0.89	0.05061	-0.02	1	0	-0.12	1	0
FBgn0034455	CG11007	0.16	1	0	0.04	1	0	0.16	1	0	-0.21	1	0	-0.23	0.78	0.107905	0.15	1	0	0.05	1	0	0.35	0.69	0.161151	0.2	1	0	0.03	1	0	-0.04	1	0	0.13	0.95	0.0222764	0.39	0.53	0.275724	0.24	0.95	0.0222764	0.23	0.97	0.0132283
FBgn0034464	CG11018	0.89	0.43	0.366532	0.68	1	0	0.92	0.25	0.60206	-0.92	1	0	0.52	0.99	0.00436481	-0.51	1	0	2.28	1	0	2.18	0.96	0.0177288	2.48	1	0	0.23	0.71	0.148742	0.25	0.71	0.148742	0.31	0.46	0.337242	0.23	0.83	0.0809219	0.33	0.58	0.236572	0.43	0.23	0.638272
FBgn0031208	CG11023	0.71	0.87	0.0604807	0.69	1	0	0.8	0.55	0.259637	1.96	1	0	1.31	0.79	0.102373	0.83	1	0	1.31	1	0	0.02	1	0	0.36	1	0	0.73	0.02	1.69897	0.79	0.0073	2.13668	0.72	0.02	1.69897	0.71	0.01	2	0.71	0.02	1.69897	0.78	0.00549	2.26043
FBgn0031735	CG11029	0.22	1	0	0.16	1	0	-0.1	1	0	0.15	1	0	0.72	0.51	0.29243	-0.02	1	0	-0.06	1	0	-0.36	0.96	0.0177288	-0.3	1	0	-0.41	0.55	0.259637	-0.11	1	0	-0.57	0.26	0.585027	-0.23	0.98	0.00877392	-0.27	1	0	-0.48	0.89	0.05061
FBgn0037235	CG1103	0.25	1	0	0.17	1	0	0.33	0.99	0.00436481	-0.1	1	0	-0.21	0.84	0.0757207	0.34	1	0	0.01	1	0	0.17	0.96	0.0177288	0.03	1	0	0.04	1	0	-0.03	1	0	0.13	0.95	0.0222764	0.28	0.95	0.0222764	0.11	1	0	-0.11	1	0
FBgn0031736	CG11030	-0.28	1	0	-0.38	1	0	-0.19	1	0	-0.05	1	0	-0.11	0.94	0.0268721	-0.04	1	0	-0.16	1	0	0.11	0.96	0.0177288	-0.00722	1	0	-0.38	0.18	0.744727	-0.17	0.85	0.0705811	-0.2	0.72	0.142668	-0.11	1	0	-0.2	1	0	-0.24	0.96	0.0177288
FBgn0031741	CG11034	-0.72	0.63	0.200659	-0.85	0.83	0.0809219	-0.54	0.78	0.107905	-1.27	3.51e-05	4.45469	-1.41	3.61e-06	5.44249	-1.14	0.000355	3.44977	-0.65	0.23	0.638272	-0.62	0.12	0.920819	-0.8	0.02	1.69897	-2.61	0	#NUM!	-2.64	0	#NUM!	-2.32	0	#NUM!	-2.19	0	#NUM!	-2.29	0	#NUM!	-2.4	0	#NUM!
FBgn0037544	CG11035	0.23	1	0	0.12	1	0	0.26	1	0	0.33	1	0	0.23	0.88	0.0555173	0.01	1	0	-0.09	1	0	0.00458	1	0	0.02	1	0	0.000424	1	0	0.21	0.89	0.05061	-0.11	0.98	0.00877392	0.08	1	0	0.22	0.98	0.00877392	0.21	1	0
FBgn0037038	CG11037	3.66	1	0	5.41	1	0	6.61	0.31	0.508638	0.7	1	0	-0.03	1	0	-0.65	1	0	#N/A	#N/A	#N/A	#N/A	#N/A	#N/A	#N/A	#N/A	#N/A	0.08	0.96	0.0177288	-0.18	0.78	0.107905	0.24	0.46	0.337242	-0.38	0.08	1.09691	-0.14	0.98	0.00877392	0.03	1	0
FBgn0037467	CG1104	-0.07	1	0	-0.05	1	0	-0.13	1	0	0.11	1	0	0.15	0.9	0.0457575	-0.03	1	0	0.03	1	0	-0.2	0.96	0.0177288	0.06	1	0	-0.07	1	0	0.09	0.97	0.0132283	-0.03	1	0	0.00351	1	0	-0.04	1	0	0.00186	1	0
FBgn0034481	CG11041	-0.11	1	0	0.52	1	0	-3.3	0.99	0.00436481	1.7	1	0	1.85	0.69	0.161151	1.75	1	0	-1.54	1	0	-0.98	0.96	0.0177288	-1.87	1	0	-0.37	0.99	0.00436481	-1.74	0.34	0.468521	-0.7	0.86	0.0655015	-0.7	0.91	0.0409586	-0.31	1	0	-0.37	1	0
FBgn0031831	CG11043	0.99	0.4	0.39794	0.59	1	0	0.86	0.38	0.420216	0.71	1	0	0.72	0.85	0.0705811	0.1	1	0	0.5	1	0	-0.8	0.96	0.0177288	-0.11	1	0	0.4	0.1	1	0.28	0.48	0.318759	0.43	0.06	1.22185	0.34	0.46	0.337242	0.47	0.15	0.823909	0.52	0.06	1.22185
FBgn0034484	CG11044	-1.11	0.97	0.0132283	0.14	1	0	-0.47	1	0	-0.21	1	0	0.33	0.81	0.091515	-0.75	0.6	0.221849	0.34	1	0	-0.05	1	0	-0.05	1	0	-0.39	0.16	0.79588	0.01	1	0	-0.42	0.13	0.886057	-0.32	0.74	0.130768	-0.26	0.92	0.0362122	-0.21	1	0
FBgn0037465	CG1105	0.13	1	0	0.27	1	0	-0.1	1	0	-0.07	1	0	-0.12	0.97	0.0132283	0.05	1	0	0.05	1	0	0.19	0.96	0.0177288	0.02	1	0	-0.11	0.94	0.0268721	0.00505	1	0	-0.11	0.93	0.0315171	-0.25	0.84	0.0757207	-0.08	1	0	-0.1	1	0
FBgn0031836	CG11050	-0.32	1	0	-0.45	1	0	-0.45	0.86	0.0655015	0.02	1	0	0.01	1	0	-0.12	1	0	-0.08	1	0	-0.02	1	0	-0.05	1	0	-0.03	1	0	-0.05	1	0	-0.14	0.83	0.0809219	-0.15	0.88	0.0555173	-0.08	1	0	-0.11	1	0
FBgn0040524	CG11052	0.46	1	0	0.43	1	0	0.34	1	0	-0.37	1	0	-0.29	0.93	0.0315171	-0.85	1	0	0.51	1	0	-0.37	0.99	0.00436481	-0.28	1	0	0.08	1	0	0.24	0.81	0.091515	0.19	0.87	0.0604807	-0.02	1	0	0.15	1	0	0.14	1	0
FBgn0033149	CG11060	0.79	0.63	0.200659	0.67	1	0	0.77	0.49	0.309804	-1.1	1	0	-0.04	1	0	-0.13	1	0	1.76	1	0	0.78	0.96	0.0177288	1.33	1	0	0.4	0.21	0.677781	0.46	0.15	0.823909	0.6	0.01	2	0.22	0.92	0.0362122	0.28	0.88	0.0555173	0.35	0.65	0.187087
FBgn0030536	CG11068	0.52	1	0	0.26	1	0	0.72	0.65	0.187087	-2.08	1	0	-0.03	1	0	-2.18	1	0	1.74	1	0	1.61	0.96	0.0177288	1.94	1	0	0.43	0.07	1.1549	0.37	0.2	0.69897	0.44	0.05	1.30103	0.16	0.96	0.0177288	0.28	0.83	0.0809219	0.33	0.64	0.19382
FBgn0039244	CG11069	-0.09	1	0	-0.04	1	0	-0.17	1	0	0.31	1	0	0.43	0.75	0.124939	0.55	1	0	0.68	1	0	-0.09	1	0	0.56	1	0	-0.11	1	0	0.03	1	0	0.29	0.78	0.107905	-0.08	1	0	-0.39	0.95	0.0222764	-0.03	1	0
FBgn0028467	CG11070	0.03	1	0	0.08	1	0	-0.07	1	0	-0.05	1	0	-0.15	0.87	0.0604807	-0.03	1	0	-0.06	1	0	0.07	1	0	-0.03	1	0	0.11	0.93	0.0315171	0.16	0.84	0.0757207	0.16	0.8	0.09691	0.12	0.99	0.00436481	0.1	1	0	0.07	1	0
FBgn0034693	CG11073	-0.47	0.69	0.161151	-0.48	1	0	-0.16	1	0	-0.17	1	0	0.39	0.68	0.167491	-0.37	1	0	-0.11	1	0	-0.52	0.85	0.0705811	-0.2	1	0	-0.22	0.6	0.221849	-0.14	0.87	0.0604807	-0.16	0.8	0.09691	-0.12	0.96	0.0177288	0.03	1	0	0.09	1	0
FBgn0039929	CG11076	-0.15	1	0	-0.14	1	0	-0.17	1	0	-0.01	1	0	-0.1	0.98	0.00877392	0.12	1	0	-0.03	1	0	0.22	0.96	0.0177288	0.1	1	0	0.09	0.96	0.0177288	0.15	0.87	0.0604807	-0.000552	1	0	0.42	0.54	0.267606	0.08	1	0	0.02	1	0
FBgn0039930	CG11077	-0.12	1	0	0.18	1	0	-0.24	1	0	0.03	1	0	0.01	1	0	0.02	1	0	0.13	1	0	0.37	0.85	0.0705811	0.00304	1	0	0.12	0.96	0.0177288	0.32	0.6	0.221849	-0.08	1	0	0.2	0.96	0.0177288	0.17	1	0	-0.19	1	0
FBgn0030408	CG11085	0.09	1	0	-0.02	1	0	0.26	1	0	0.96	1	0	1.49	0.69	0.161151	0.65	1	0	0.36	1	0	0.53	1	0	-1.22	1	0	-1.04	0.63	0.200659	-0.13	1	0	-0.52	0.93	0.0315171	0.81	0.83	0.0809219	0.28	1	0	0.3	1	0
FBgn0039241	CG11089	-0.03	1	0	0.09	1	0	-0.04	1	0	0.16	1	0	0.15	0.86	0.0655015	0.12	1	0	0.19	1	0	0.35	0.26	0.585027	0.21	1	0	-0.19	0.84	0.0757207	-0.21	0.85	0.0705811	-0.17	0.87	0.0604807	0.11	1	0	0.68	0.28	0.552842	0.51	0.55	0.259637
FBgn0046222	CG1109	-0.16	1	0	-0.08	1	0	-0.02	1	0	-0.24	1	0	-0.26	0.74	0.130768	0.17	1	0	0.00784	1	0	0.23	0.96	0.0177288	0.05	1	0	0.03	1	0	-0.06	1	0	0.15	0.94	0.0268721	0.33	0.66	0.180456	0.09	1	0	0.08	1	0
FBgn0030528	CG11095	-0.19	1	0	-0.22	1	0	-0.33	1	0	-0.26	1	0	-0.13	1	0	-0.05	1	0	0.006	1	0	-0.34	0.96	0.0177288	0.02	1	0	-0.23	0.94	0.0268721	-0.56	0.5	0.30103	-0.14	0.99	0.00436481	0.22	1	0	0.12	1	0	0.08	1	0
FBgn0034485	CG11099	-1.56	0.78	0.107905	-2.68	0.78	0.107905	-1.87	0.45	0.346787	-0.2	1	0	0.43	0.64	0.19382	-0.52	1	0	0.06	1	0	-0.42	0.96	0.0177288	-0.23	1	0	-0.12	0.96	0.0177288	-0.03	1	0	-0.35	0.46	0.337242	-0.22	0.92	0.0362122	-0.08	1	0	-0.13	1	0
FBgn0030522	CG11103	-0.04	1	0	-0.02	1	0	-0.13	1	0	-0.49	1	0	-0.32	0.8	0.09691	0.01	1	0	-0.03	1	0	0.13	1	0	0.05	1	0	-0.27	0.86	0.0655015	-0.1	1	0	-0.28	0.85	0.0705811	0.21	0.99	0.00436481	-0.26	1	0	-0.03	1	0
FBgn0030280	CG11106	1.01	0.3	0.522879	0.8	0.98	0.00877392	1.01	0.17	0.769551	1.39	1	0	0.83	1	0	-0.1	1	0	-0.07	1	0	3.54	0.96	0.0177288	0.08	1	0	0.17	0.77	0.113509	0.26	0.52	0.283997	0.34	0.2	0.69897	0.19	0.96	0.0177288	0.35	0.76	0.119186	0.37	0.66	0.180456
FBgn0033160	CG11107	-0.04	1	0	-0.13	1	0	-0.07	1	0	0.1	1	0	0.05	1	0	0.13	1	0	0.07	1	0	0.1	0.96	0.0177288	0.09	1	0	-2.46e-05	1	0	0.05	1	0	-0.04	1	0	0.07	1	0	-0.00114	1	0	-0.07	1	0
FBgn0037200	CG11109	0.13	1	0	0.09	1	0	-0.08	1	0	0.11	1	0	0.12	0.99	0.00436481	0.43	1	0	-0.04	1	0	0.21	0.96	0.0177288	0.03	1	0	-0.3	0.76	0.119186	-0.00947	1	0	-0.27	0.81	0.091515	0.17	0.97	0.0132283	0.16	1	0	0.06	1	0
FBgn0034535	CG11110	-0.04	1	0	-0.09	1	0	-0.2	1	0	-0.27	1	0	-0.32	0.75	0.124939	-0.02	1	0	-0.28	1	0	-0.06	1	0	-0.08	1	0	0.2	0.89	0.05061	0.21	0.91	0.0409586	0.27	0.77	0.113509	0.13	1	0	-0.02	1	0	0.08	1	0
FBgn0033164	CG11112	3.13	1	0	2.39	1	0	-0.06	1	0	0.03	1	0	2.39	0.9	0.0457575	0.05	1	0	-2.39	1	0	-2.36	0.96	0.0177288	-2.24	1	0	0.23	0.72	0.142668	-0.09	1	0	0.04	1	0	0.09	1	0	-0.27	0.91	0.0409586	0.03	1	0
FBgn0033165	CG11113	#N/A	#N/A	#N/A	#N/A	#N/A	#N/A	#N/A	#N/A	#N/A	#N/A	#N/A	#N/A	#N/A	#N/A	#N/A	#N/A	#N/A	#N/A	#N/A	#N/A	#N/A	#N/A	#N/A	#N/A	#N/A	#N/A	#N/A	0.34	0.71	0.148742	-0.08	1	0	0.41	0.54	0.267606	-0.04	1	0	-0.31	1	0	-0.13	1	0
FBgn0030266	CG11122	-0.17	1	0	-0.1	1	0	-0.11	1	0	-0.08	1	0	-0.02	1	0	0.05	1	0	0.23	1	0	-0.12	0.97	0.0132283	-0.03	1	0	0.18	0.72	0.142668	-0.1	0.96	0.0177288	-0.00991	1	0	-0.02	1	0	0.02	1	0	-0.07	1	0
FBgn0033169	CG11123	-0.18	1	0	-0.1	1	0	-0.14	1	0	0.03	1	0	-0.05	1	0	-0.05	1	0	-0.09	1	0	0.02	1	0	0.04	1	0	-0.07	1	0	0.18	0.91	0.0409586	0.16	0.91	0.0409586	0.3	0.94	0.0268721	-0.13	1	0	-0.29	1	0
FBgn0033174	CG11125	0.83	0.47	0.327902	0.6	1	0	0.91	0.24	0.619789	0.01	1	0	0.06	1	0	0.21	1	0	0.27	1	0	0.32	0.96	0.0177288	0.27	1	0	0.44	0.03	1.52288	0.29	0.41	0.387216	0.43	0.04	1.39794	0.24	0.55	0.259637	0.21	0.73	0.136677	0.38	0.09	1.04576
FBgn0033178	CG11127	-0.15	1	0	-0.12	1	0	-0.34	1	0	-0.09	1	0	-0.02	1	0	-0.13	1	0	0.04	1	0	0.09	1	0	-0.01	1	0	-0.09	1	0	-0.17	0.96	0.0177288	-0.08	1	0	-0.09	1	0	0.04	1	0	-0.16	1	0
FBgn0037304	CG1113	0.58	1	0	0.66	1	0	0.12	1	0	1.04	1	0	1	0.71	0.148742	0.75	1	0	0.27	1	0	0.64	0.96	0.0177288	0.78	1	0	-1.23	0.39	0.408935	-0.45	0.95	0.0222764	0.19	1	0	-0.9	0.54	0.267606	-0.41	1	0	-0.25	1	0
FBgn0037204	CG11131	-1.41	0.31	0.508638	-1.08	1	0	-1.31	0.23	0.638272	0.86	1	0	1.36	0.9	0.0457575	1.27	1	0	-1.17	1	0	-2.16	0.73	0.136677	-1.35	1	0	0.24	0.9	0.0457575	-0.65	0.33	0.481486	0.2	0.94	0.0268721	-0.62	0.78	0.107905	-0.42	1	0	-0.42	1	0
FBgn0030518	CG11134	0.06	1	0	0.06	1	0	-0.08	1	0	0.05	1	0	0.1	1	0	0.05	1	0	-0.14	1	0	-0.07	1	0	-0.04	1	0	-0.19	0.88	0.0555173	-0.14	0.96	0.0177288	-0.03	1	0	-0.36	0.53	0.275724	-0.28	0.8	0.09691	-0.17	1	0
FBgn0037199	CG11137	0.17	1	0	0.09	1	0	0.19	1	0	-0.11	1	0	-0.2	0.84	0.0757207	0.2	1	0	-0.03	1	0	0.29	0.96	0.0177288	0.15	1	0	0.06	1	0	0.02	1	0	0.08	1	0	0.16	0.96	0.0177288	0.08	1	0	0.04	1	0
FBgn0030400	CG11138	-0.08	1	0	-0.07	1	0	-0.05	1	0	0.23	1	0	0.05	1	0	0.21	1	0	0.06	1	0	0.04	1	0	-0.03	1	0	0.07	0.99	0.00436481	0.06	1	0	0.13	0.87	0.0604807	0.18	0.81	0.091515	0.08	1	0	0.13	1	0
FBgn0033177	CG11141	0.28	1	0	0.14	1	0	0.16	1	0	-0.17	1	0	-0.19	0.88	0.0555173	0.19	1	0	0.03	1	0	0.15	0.96	0.0177288	0.02	1	0	0.33	0.23	0.638272	0.22	0.66	0.180456	0.34	0.21	0.677781	0.19	0.9	0.0457575	0.27	0.76	0.119186	0.25	0.79	0.102373
FBgn0033168	CG11145	0.95	0.79	0.102373	0.78	1	0	0.92	0.64	0.19382	2.41	1	0	0.13	1	0	0.05	1	0	-0.07	1	0	2.18	0.96	0.0177288	0.08	1	0	0.41	0.43	0.366532	0.44	0.44	0.356547	0.41	0.41	0.387216	0.2	0.96	0.0177288	0.34	0.9	0.0457575	0.4	0.72	0.142668
FBgn0031734	CG11147	-0.02	1	0	-0.12	1	0	-0.27	1	0	0.15	1	0	0.47	0.22	0.657577	-0.3	1	0	0.13	1	0	-0.38	0.91	0.0409586	-0.09	1	0	-0.21	0.58	0.236572	-0.24	0.53	0.275724	-0.22	0.51	0.29243	-0.33	0.78	0.107905	-0.28	0.91	0.0409586	-0.26	0.95	0.0222764
FBgn0039936	CG11148	-0.2	1	0	-0.06	1	0	-0.13	1	0	0.02	1	0	-0.06	1	0	0.09	1	0	-0.00223	1	0	0.14	0.96	0.0177288	0.04	1	0	-0.14	0.91	0.0409586	0.09	0.99	0.00436481	-0.16	0.86	0.0655015	0.06	1	0	-0.05	1	0	-0.09	1	0
FBgn0031732	CG11149	-1.08	0.46	0.337242	-0.83	1	0	-1.65	0.05	1.30103	0.33	1	0	0.29	0.83	0.0809219	-0.35	1	0	-0.15	1	0	-0.4	0.96	0.0177288	-0.21	1	0	0.32	0.59	0.229148	0.08	1	0	0.21	0.83	0.0809219	0.11	1	0	-0.06	1	0	0.00506	1	0
FBgn0030519	CG11151	0.12	1	0	0.32	1	0	-0.16	1	0	0.17	1	0	0.2	0.83	0.0809219	0.08	1	0	-0.06	1	0	0.000259	1	0	-9.53e-05	1	0	0.08	0.96	0.0177288	-0.05	1	0	0.06	1	0	-0.09	1	0	-0.14	1	0	-0.23	0.83	0.0809219
FBgn0039927	CG11155	-0.2	1	0	-0.03	1	0	-0.11	1	0	0.18	1	0	0.43	0.39	0.408935	-0.31	1	0	-0.06	1	0	-0.14	0.98	0.00877392	-0.16	1	0	-0.23	0.51	0.29243	0.04	1	0	-0.22	0.51	0.29243	-0.08	0.97	0.0132283	-0.03	1	0	-0.00446	1	0
FBgn0030511	CG11158	-0.2	1	0	-0.29	1	0	-0.31	1	0	0.22	1	0	0.33	0.82	0.0861861	-0.13	1	0	0.09	1	0	0.17	1	0	0.01	1	0	-0.00345	1	0	0.08	1	0	-0.18	0.92	0.0362122	0.03	1	0	0.01	1	0	-0.19	1	0
FBgn0034539	CG11159	1.28	1	0	0.00682	1	0	0.74	1	0	0.03	1	0	0.13	1	0	2.31	1	0	-1.41	1	0	-1.52	0.96	0.0177288	-3.62	1	0	0.74	1	0	-1.04	0.99	0.00436481	0.43	1	0	-3.16	0.92	0.0362122	-0.68	1	0	0.57	1	0
FBgn0037297	CG1116	0.04	1	0	0.12	1	0	0.09	1	0	-0.17	1	0	-0.19	0.9	0.0457575	0.08	1	0	-0.07	1	0	0.07	1	0	-0.01	1	0	0.02	1	0	-0.21	0.77	0.113509	0.01	1	0	-0.14	0.96	0.0177288	0.02	1	0	-0.000984	1	0
FBgn0030257	CG11160	-0.95	0.57	0.244125	-0.27	1	0	-0.74	0.69	0.161151	-0.3	1	0	0.59	0.53	0.275724	-0.69	1	0	-0.44	1	0	-0.59	0.96	0.0177288	-0.45	1	0	-0.75	0.000107	3.97062	0.000726	1	0	-0.64	0.00237	2.62525	-0.37	0.84	0.0757207	0.2	1	0	0.07	1	0
FBgn0030509	CG11162	-1.24	0.75	0.124939	-0.81	1	0	-2.42	0.05	1.30103	0.9	1	0	1.15	0.36	0.443697	0.18	1	0	0.75	1	0	0.06	1	0	0.66	1	0	1.12	0.12	0.920819	0.87	0.42	0.376751	0.61	0.67	0.173925	0.00837	1	0	-0.04	1	0	-0.92	0.43	0.366532
FBgn0030507	CG11164	0.12	1	0	0.05	1	0	-0.27	1	0	-0.59	0.88	0.0555173	-0.81	0.17	0.769551	-0.02	1	0	-0.03	1	0	0.13	0.96	0.0177288	0.05	1	0	-0.04	1	0	0.07	1	0	0.05	1	0	2.67	0.00472	2.32606	1.22	0.65	0.187087	0.28	1	0
FBgn0033238	CG11165	0.83	0.82	0.0861861	0.21	1	0	0.81	0.67	0.173925	2.41	1	0	2.39	0.9	0.0457575	0.05	1	0	#N/A	#N/A	#N/A	#N/A	#N/A	#N/A	#N/A	#N/A	#N/A	0.25	0.77	0.113509	0.4	0.5	0.30103	0.4	0.4	0.39794	0.23	0.92	0.0362122	0.26	0.95	0.0222764	0.34	0.74	0.130768
FBgn0039249	CG11168	-0.08	1	0	0.07	1	0	-0.3	1	0	0.08	1	0	0.22	0.84	0.0757207	-0.00817	1	0	-0.03	1	0	-0.29	0.96	0.0177288	-0.14	1	0	0.06	1	0	-0.06	1	0	0.14	0.85	0.0705811	-0.13	0.96	0.0177288	-0.09	1	0	-0.06	1	0
FBgn0034705	CG11170	0.29	1	0	0.17	1	0	0.36	1	0	-0.14	1	0	-0.2	0.9	0.0457575	0.28	1	0	0.12	1	0	0.31	0.96	0.0177288	0.17	1	0	0.25	0.93	0.0315171	0.1	1	0	0.07	1	0	0.1	1	0	-0.31	1	0	-0.18	1	0
FBgn0030499	CG11178	0.00788	1	0	0.02	1	0	-0.16	1	0	-0.34	1	0	-0.42	0.47	0.327902	-0.03	1	0	-0.06	1	0	0.1	0.99	0.00436481	-0.06	1	0	0.08	1	0	0.02	1	0	0.08	1	0	0.18	0.96	0.0177288	-0.05	1	0	-0.04	1	0
FBgn0034528	CG11180	-0.3	1	0	-0.06	1	0	-0.17	1	0	0.1	1	0	0.00232	1	0	0.13	1	0	0.00768	1	0	0.09	0.96	0.0177288	-0.03	1	0	0.00685	1	0	0.17	0.92	0.0362122	-0.09	1	0	0.6	0.5	0.30103	0.01	1	0	-0.08	1	0
FBgn0030035	CG11190	-0.02	1	0	-0.04	1	0	-0.11	1	0	-0.08	1	0	-0.2	0.82	0.0861861	0.02	1	0	0.00709	1	0	0.09	0.96	0.0177288	0.00977	1	0	0.02	1	0	0.00781	1	0	-0.02	1	0	0.15	0.96	0.0177288	-0.00115	1	0	-0.03	1	0
FBgn0033249	CG11191	-0.68	1	0	-0.68	1	0	-0.02	1	0	-0.26	1	0	0.23	0.94	0.0268721	-0.35	1	0	-0.18	1	0	-0.53	0.96	0.0177288	-0.35	1	0	0.02	1	0	-0.04	1	0	-0.08	1	0	-0.31	0.89	0.05061	-0.25	1	0	-0.15	1	0
FBgn0034507	CG11192	0.39	1	0	0.16	1	0	0.87	0.99	0.00436481	-0.56	1	0	0.18	1	0	-0.38	1	0	3.67	1	0	4.23	0.96	0.0177288	4.82	1	0	0.25	1	0	0.14	1	0	-0.74	0.9	0.0457575	-0.21	1	0	0.87	0.97	0.0132283	-0.36	1	0
FBgn0034500	CG11200	-0.05	1	0	-0.05	1	0	0.01	1	0	0.29	1	0	0.24	0.75	0.124939	-0.02	1	0	-0.02	1	0	-0.17	0.96	0.0177288	-0.16	1	0	-0.01	1	0	-0.21	0.68	0.167491	-0.00144	1	0	-0.33	0.61	0.21467	-0.75	0.00587	2.23136	-0.66	0.02	1.69897
FBgn0034488	CG11208	0.03	1	0	-0.01	1	0	-0.28	0.99	0.00436481	-0.13	1	0	-0.19	0.82	0.0861861	0.05	1	0	-0.06	1	0	0.14	0.96	0.0177288	0.11	1	0	0.06	1	0	-0.1	0.99	0.00436481	0.00954	1	0	0.33	0.65	0.187087	0.1	1	0	-0.03	1	0
FBgn0033259	CG11210	-0.18	1	0	-0.22	1	0	-0.24	1	0	-0.05	1	0	-0.09	0.95	0.0222764	0.04	1	0	-0.04	1	0	0.04	1	0	-0.000933	1	0	-0.15	0.8	0.09691	-0.18	0.77	0.113509	-0.12	0.88	0.0555173	-0.11	0.96	0.0177288	-0.23	0.65	0.187087	-0.13	1	0
FBgn0033067	CG11211	2.28	1	0	0.13	1	0	2.27	1	0	0.89	0.23	0.638272	0.93	0.14	0.853872	0.07	1	0	0.92	0.8	0.09691	0.53	0.95	0.0222764	0.59	1	0	-0.11	0.99	0.00436481	0.15	0.96	0.0177288	-0.27	0.71	0.148742	0.21	0.92	0.0362122	-0.07	1	0	0.31	0.75	0.124939
FBgn0031855	CG11221	-0.28	1	0	-0.9	0.61	0.21467	-1.19	0.06	1.22185	0.22	1	0	0.56	0.63	0.200659	0.01	1	0	0.21	1	0	-0.2	1	0	-0.09	1	0	0.16	0.89	0.05061	-0.00461	1	0	0.15	0.91	0.0409586	-0.22	0.92	0.0362122	0.00663	1	0	-0.06	1	0
FBgn0037195	CG11226	0.96	0.59	0.229148	0.76	1	0	0.99	0.4	0.39794	-0.15	1	0	1.47	0.49	0.309804	0.78	1	0	0.18	1	0	0.13	1	0	-0.69	1	0	0.22	0.68	0.167491	0.24	0.69	0.161151	0.43	0.11	0.958607	0.36	0.62	0.207608	0.32	0.77	0.113509	0.39	0.52	0.283997
FBgn0031139	CG11227	0.34	1	0	0.28	1	0	0.66	0.85	0.0705811	-0.85	1	0	-0.02	1	0	-0.95	1	0	-0.07	1	0	3.01	0.96	0.0177288	2.48	1	0	-0.14	0.96	0.0177288	0.18	0.92	0.0362122	0.08	1	0	0.13	0.98	0.00877392	0.21	1	0	0.35	0.67	0.173925
FBgn0039939	CG11231	-2.43	0.8	0.09691	-1.49	1	0	-0.68	1	0	1.65	1	0	1.37	0.73	0.136677	0.83	1	0	-0.43	1	0	-1.12	0.96	0.0177288	-0.78	1	0	-1.01	0.86	0.0655015	0.2	1	0	-0.1	1	0	-0.21	1	0	-1.7	0.82	0.0861861	-0.61	1	0
FBgn0031860	CG11236	-0.39	1	0	-0.4	1	0	-0.92	0.75	0.124939	0.6	0.67	0.173925	0.48	0.52	0.283997	0.12	1	0	-0.2	1	0	-0.68	0.73	0.136677	-0.3	1	0	-0.18	0.74	0.130768	-0.45	0.05	1.30103	-0.34	0.21	0.677781	-0.46	0.37	0.431798	-0.23	0.98	0.00877392	-0.13	1	0
FBgn0037290	CG1124	0.42	1	0	-0.02	1	0	0.5	0.99	0.00436481	0.09	1	0	0.39	0.67	0.173925	-0.14	1	0	0.05	1	0	-0.35	0.96	0.0177288	-0.04	1	0	-0.07	1	0	-0.03	1	0	-0.12	0.9	0.0457575	-0.3	0.6	0.221849	-0.29	0.67	0.173925	-0.22	0.9	0.0457575
FBgn0037186	CG11241	0.05	1	0	0.27	1	0	-0.19	1	0	0.32	1	0	0.16	0.91	0.0409586	0.19	1	0	0.28	1	0	-0.1	1	0	0.37	1	0	0.1	0.99	0.00436481	-0.08	1	0	-0.00684	1	0	-0.38	0.53	0.275724	-0.11	1	0	-0.2	1	0
FBgn0037120	CG11247	-0.07	1	0	-0.03	1	0	-0.14	1	0	0.00397	1	0	-0.09	1	0	0.15	1	0	0.03	1	0	0.21	0.96	0.0177288	0.03	1	0	-0.02	1	0	0.16	0.87	0.0604807	0.00639	1	0	0.07	1	0	0.000603	1	0	-0.03	1	0
FBgn0037117	CG11248	-0.00247	1	0	0.03	1	0	0.16	1	0	-0.06	1	0	-0.07	1	0	0.06	1	0	-0.00056	1	0	0.13	0.96	0.0177288	0.1	1	0	0.14	0.94	0.0268721	0.22	0.82	0.0861861	0.16	0.9	0.0457575	0.13	0.96	0.0177288	0.03	1	0	0.05	1	0
FBgn0037115	CG11249	1.12	0.38	0.420216	1.02	0.9	0.0457575	1.4	0.09	1.04576	-0.56	1	0	0.36	1	0	0.09	1	0	-0.03	1	0	-0.99	0.98	0.00877392	1.09	1	0	0.24	0.54	0.267606	0.29	0.45	0.346787	0.48	0.03	1.52288	0.11	1	0	0.22	0.97	0.0132283	0.3	0.72	0.142668
FBgn0036346	CG11251	1.43	0.13	0.886057	0.94	1	0	1.48	0.06	1.22185	0.86	1	0	0.83	1	0	-0.1	1	0	-0.07	1	0	-0.04	1	0	2.48	1	0	0.26	0.69	0.161151	0.24	0.79	0.102373	0.41	0.28	0.552842	0.19	0.92	0.0362122	0.24	0.93	0.0315171	0.38	0.48	0.318759
FBgn0034442	CG11257	-0.02	1	0	0.14	1	0	-0.0058	1	0	-0.29	1	0	-0.36	0.69	0.161151	0.00429	1	0	0.11	1	0	0.27	0.96	0.0177288	0.12	1	0	-0.21	0.92	0.0362122	-0.05	1	0	-0.05	1	0	0.12	1	0	-0.06	1	0	-0.04	1	0
FBgn0037280	CG1126	-1.26	1	0	0.72	1	0	-1.28	0.99	0.00436481	-1.06	1	0	-0.28	1	0	-1.35	1	0	-0.49	1	0	-0.38	1	0	-0.29	1	0	0.08	1	0	-0.19	1	0	-0.38	0.95	0.0222764	-0.35	0.96	0.0177288	-0.4	1	0	-0.43	1	0
FBgn0036332	CG11261	0.03	1	0	0.1	1	0	-0.15	1	0	0.14	1	0	-0.13	0.98	0.00877392	0.26	1	0	0.28	1	0	0.28	0.96	0.0177288	0.21	1	0	0.48	0.29	0.537602	0.55	0.22	0.657577	0.34	0.61	0.21467	0.29	0.93	0.0315171	0.02	1	0	0.2	1	0
FBgn0036329	CG11262	1.09	0.43	0.366532	0.65	1	0	1.23	0.18	0.744727	0.00577	1	0	0.83	0.99	0.00436481	0.74	1	0	#N/A	#N/A	#N/A	#N/A	#N/A	#N/A	#N/A	#N/A	#N/A	0.33	0.23	0.638272	0.16	0.85	0.0705811	0.49	0.02	1.69897	0.4	0.35	0.455932	0.29	0.71	0.148742	0.6	0.04	1.39794
FBgn0036330	CG11263	-0.1	1	0	0.43	1	0	0.69	1	0	1.12	0.000606	3.21753	-0.16	0.91	0.0409586	1.3	1.4e-05	4.85387	1.25	0.02	1.69897	-0.19	0.98	0.00877392	1.42	0.00212	2.67366	-0.68	0.87	0.0604807	0.79	0.79	0.102373	0.39	0.96	0.0177288	1.37	0.45	0.346787	0.77	0.97	0.0132283	0.12	1	0
FBgn0036334	CG11267	-0.31	1	0	-0.39	1	0	-0.21	1	0	-0.11	1	0	-0.14	0.9	0.0457575	-0.00266	1	0	-0.02	1	0	0.01	1	0	0.04	1	0	-0.05	1	0	0.1	1	0	-0.07	1	0	0.43	0.46	0.337242	0.02	1	0	-0.11	1	0
FBgn0034700	CG11269	2.76	0.34	0.468521	2.04	1	0	2.22	0.41	0.387216	1.23	1	0	0.89	0.92	0.0362122	0.41	1	0	1.35	1	0	0.69	1	0	1.02	1	0	-1.91	0.35	0.455932	-0.38	1	0	-0.49	0.96	0.0177288	-0.66	0.91	0.0409586	-0.06	1	0	-0.43	1	0
FBgn0034706	CG11275	0.29	1	0	0.08	1	0	0.2	1	0	-0.54	0.65	0.187087	-0.14	0.93	0.0315171	-0.24	1	0	-0.57	1	0	-0.75	0.09	1.04576	-0.08	1	0	-0.25	0.71	0.148742	-0.09	1	0	-0.04	1	0	-0.32	0.66	0.180456	-0.01	1	0	0.000233	1	0
FBgn0036342	CG11279	-0.16	1	0	-0.22	1	0	0.1	1	0	0.26	1	0	0.18	0.9	0.0457575	0.23	1	0	0.07	1	0	0.13	0.98	0.00877392	0.25	1	0	0.53	0.25	0.60206	0.16	0.97	0.0132283	0.51	0.3	0.522879	0.38	0.81	0.091515	0.02	1	0	0.19	1	0
FBgn0030056	CG11284	-0.1	1	0	-0.17	1	0	-0.23	1	0	-0.13	1	0	-0.21	0.8	0.09691	0.03	1	0	-0.04	1	0	0.14	0.96	0.0177288	0.07	1	0	-0.13	0.87	0.0604807	-0.19	0.76	0.119186	-0.11	0.93	0.0315171	0.12	1	0	-0.22	1	0	-0.24	1	0
FBgn0037516	CG11286	1.14	0.68	0.167491	1.04	1	0	1.24	0.41	0.387216	0.03	1	0	2.39	0.9	0.0457575	0.05	1	0	#N/A	#N/A	#N/A	#N/A	#N/A	#N/A	#N/A	#N/A	#N/A	0.12	0.99	0.00436481	0.37	0.56	0.251812	0.39	0.43	0.366532	0.31	0.93	0.0315171	0.49	0.76	0.119186	0.5	0.72	0.142668
FBgn0031887	CG11289	0.28	1	0	-0.01	1	0	0.57	1	0	-0.08	1	0	0.02	1	0	-0.09	1	0	-0.09	1	0	-0.17	1	0	-0.49	1	0	-0.54	0.96	0.0177288	0.86	0.84	0.0757207	0.88	0.78	0.107905	-1.55	0.82	0.0861861	-0.19	1	0	-0.8	1	0
FBgn0037279	CG1129	0.06	1	0	-0.08	1	0	0.08	1	0	0.15	1	0	-0.09	1	0	0.03	1	0	0.12	1	0	0.14	0.96	0.0177288	0.18	1	0	0.13	0.94	0.0268721	-0.000735	1	0	-0.03	1	0	-0.1	0.99	0.00436481	-0.27	0.79	0.102373	-0.07	1	0
FBgn0034713	CG11291	1	0.43	0.366532	0.86	1	0	1.14	0.18	0.744727	0.03	1	0	0.13	1	0	3.14	1	0	-2.39	1	0	0.69	1	0	0.16	1	0	0.17	0.91	0.0409586	0.38	0.48	0.318759	0.31	0.57	0.244125	0.05	1	0	0.19	1	0	0.39	0.48	0.318759
FBgn0030058	CG11294	0.39	1	0	0.51	1	0	0.21	1	0	0.95	1	0	1.48	0.78	0.107905	-0.65	1	0	-0.03	1	0	-1.38	0.96	0.0177288	-0.13	1	0	0.73	0.18	0.744727	1.14	0.00448	2.34872	0.97	0.03	1.52288	0.49	0.77	0.113509	0.48	0.83	0.0809219	0.32	1	0
FBgn0034721	CG11298	1.08	0.46	0.337242	0.44	1	0	1	0.39	0.408935	3.26	1	0	3.23	0.84	0.0757207	2.31	1	0	-0.07	1	0	-0.04	1	0	2.48	1	0	0.25	0.72	0.142668	0.36	0.51	0.29243	0.48	0.18	0.744727	0.1	1	0	0.34	0.68	0.167491	0.4	0.48	0.318759
FBgn0034901	CG11300	-0.35	1	0	0.33	1	0	-1.1	0.3	0.522879	0.00581	1	0	-2.27	0.9	0.0457575	-0.1	1	0	-0.04	1	0	-2.36	0.96	0.0177288	-2.24	1	0	-2.03	0.39	0.408935	-0.78	0.92	0.0362122	-0.54	0.95	0.0222764	0.43	0.97	0.0132283	0.48	1	0	0.24	1	0
FBgn0037108	CG11306	-0.16	1	0	-0.09	1	0	-0.17	1	0	-0.02	1	0	-0.09	0.98	0.00877392	-0.03	1	0	0.02	1	0	0.1	0.96	0.0177288	0.04	1	0	-0.15	0.83	0.0809219	-0.02	1	0	0.00218	1	0	-0.07	1	0	-0.14	1	0	-0.2	1	0
FBgn0037106	CG11307	0.01	1	0	0.00659	1	0	0.07	1	0	-0.32	1	0	-0.21	0.9	0.0457575	0.23	1	0	0.04	1	0	0.2	0.96	0.0177288	0.03	1	0	0.14	1	0	0.23	0.96	0.0177288	-0.02	1	0	0.4	0.93	0.0315171	-0.08	1	0	-0.02	1	0
FBgn0037070	CG11309	-0.27	1	0	0.02	1	0	-0.5	0.71	0.148742	0.22	1	0	0.23	0.76	0.119186	0.05	1	0	-0.11	1	0	-0.19	0.96	0.0177288	-0.05	1	0	0.05	1	0	-0.22	0.64	0.19382	0.06	1	0	-0.13	0.93	0.0315171	-0.27	0.45	0.346787	-0.14	1	0
FBgn0039798	CG11313	-0.42	1	0	-0.14	1	0	-0.67	0.83	0.0809219	0.38	1	0	0.71	0.81	0.091515	0.33	1	0	0.69	1	0	0.69	0.96	0.0177288	0.39	1	0	0.35	1	0	0.12	1	0	-0.38	1	0	-0.03	1	0	0.06	1	0	0.5	1	0
FBgn0039816	CG11317	-0.4	1	0	-0.36	1	0	-0.36	1	0	0.81	1	0	1.11	0.4	0.39794	0.54	1	0	0.13	1	0	-0.22	1	0	0.14	1	0	0.02	1	0	-0.24	0.89	0.05061	-0.39	0.58	0.236572	0.00269	1	0	-0.06	1	0	0.05	1	0
FBgn0039818	CG11318	-0.27	1	0	-0.59	1	0	-0.73	0.29	0.537602	0.74	0.88	0.0555173	0.23	0.92	0.0362122	-0.44	1	0	0.14	1	0	-0.6	0.96	0.0177288	-0.23	1	0	0.89	0.02	1.69897	0.15	0.99	0.00436481	0.22	0.92	0.0362122	0.08	1	0	0.52	0.69	0.161151	0.76	0.22	0.657577
FBgn0031835	CG11319	-0.16	1	0	-0.02	1	0	0.23	1	0	0.26	1	0	0.46	0.46	0.337242	-0.24	1	0	-0.22	1	0	-0.58	0.65	0.187087	-0.36	1	0	-0.09	0.96	0.0177288	-0.09	0.97	0.0132283	-0.19	0.66	0.180456	-0.19	0.76	0.119186	-0.22	0.66	0.180456	-0.21	0.71	0.148742
FBgn0031837	CG11320	0.7	1	0	-2.08	1	0	-0.43	1	0	-0.49	1	0	-0.62	0.9	0.0457575	-0.7	1	0	-0.41	1	0	-0.1	1	0	-0.87	1	0	0.79	0.92	0.0362122	-0.01	1	0	0.65	0.94	0.0268721	0.62	0.96	0.0177288	1	0.97	0.0132283	0.69	1	0
FBgn0031857	CG11321	-1.19	0.58	0.236572	-1.08	1	0	-0.6	1	0	-0.07	1	0	0.67	0.16	0.79588	-0.35	1	0	0.47	1	0	-0.27	0.96	0.0177288	0.11	1	0	-0.11	0.96	0.0177288	0.21	0.81	0.091515	-0.32	0.38	0.420216	0.02	1	0	0.36	0.15	0.823909	0.28	0.38	0.420216
FBgn0031856	CG11322	0.69	0.96	0.0177288	0.48	1	0	0.73	0.71	0.148742	-0.39	1	0	0.52	1	0	0.18	1	0	-1.41	1	0	-0.16	1	0	0.56	1	0	0.31	0.67	0.173925	0.12	0.99	0.00436481	0.16	0.94	0.0268721	0.23	0.92	0.0362122	0.31	0.83	0.0809219	0.45	0.41	0.387216
FBgn0031849	CG11327	0.75	0.67	0.173925	0.74	1	0	0.9	0.31	0.508638	0.54	1	0	1.85	0.69	0.161151	1.1	1	0	4.61	1	0	4.23	0.96	0.0177288	2.48	1	0	0.28	0.32	0.49485	0.26	0.48	0.318759	0.39	0.07	1.1549	0.24	0.55	0.259637	0.3	0.34	0.468521	0.41	0.05	1.30103
FBgn0039850	CG11333	1.25	0.55	0.259637	1.3	0.96	0.0177288	1.33	0.32	0.49485	-0.77	1	0	-0.25	1	0	-2.65	1	0	1.74	1	0	-2.36	0.96	0.0177288	1.94	1	0	0.37	0.69	0.161151	0.4	0.69	0.161151	0.37	0.68	0.167491	0.48	0.75	0.124939	0.59	0.59	0.229148	0.52	0.68	0.167491
FBgn0039849	CG11334	-0.17	1	0	-0.00694	1	0	0.01	1	0	-0.09	1	0	-0.07	1	0	0.06	1	0	-0.18	1	0	-0.13	0.96	0.0177288	0.03	1	0	-0.21	0.64	0.19382	-0.16	0.84	0.0757207	-0.14	0.86	0.0655015	-0.18	0.94	0.0268721	-0.44	0.34	0.468521	-0.27	0.83	0.0809219
FBgn0039846	CG11337	-0.25	1	0	-0.27	1	0	-0.25	1	0	-0.18	1	0	-0.19	0.89	0.05061	0.18	1	0	-0.19	1	0	-0.1	1	0	-0.03	1	0	-0.05	1	0	-0.00137	1	0	0.04	1	0	0.01	1	0	-0.15	1	0	-0.02	1	0
FBgn0039840	CG11340	0.93	0.53	0.275724	0.74	1	0	0.55	0.91	0.0409586	0.71	0.58	0.236572	0.69	0.34	0.468521	0.01	1	0	0.16	1	0	-0.03	1	0	0.21	1	0	0.14	0.95	0.0222764	0.11	0.99	0.00436481	-0.16	0.94	0.0268721	0.36	0.57	0.244125	0.57	0.11	0.958607	0.9	0.000428	3.36856
FBgn0035537	CG11342	-0.12	1	0	0.05	1	0	-0.04	1	0	-0.11	1	0	-0.17	0.91	0.0409586	0.08	1	0	-0.14	1	0	0.21	0.96	0.0177288	0.01	1	0	-0.14	1	0	0.69	0.51	0.29243	0.2	0.98	0.00877392	-0.000162	1	0	0.2	1	0	-0.08	1	0
FBgn0035546	CG11345	0.62	1	0	0.41	1	0	-0.03	1	0	0.03	1	0	2.39	0.9	0.0457575	0.05	1	0	-1.24	1	0	-4.43	0.96	0.0177288	-1.92	1	0	2.21	0.96	0.0177288	-0.09	1	0	2.29	0.94	0.0268721	-0.03	1	0	2.45	1	0	3.17	1	0
FBgn0035550	CG11349	-0.00681	1	0	0.14	1	0	-0.53	0.55	0.259637	0.03	1	0	0.13	1	0	3.67	1	0	#N/A	#N/A	#N/A	#N/A	#N/A	#N/A	#N/A	#N/A	#N/A	-1.03	0.97	0.0132283	-0.19	1	0	-0.1	1	0	-2.31	0.96	0.0177288	-2.22	1	0	1.41	1	0
FBgn0035552	CG11350	-6.16	1.94e-06	5.7122	-5.89	4.9e-06	5.3098	-6.17	8.82e-07	6.05453	-3.23	1	0	0.51	1	0	1.1	1	0	0.89	1	0	-0.15	1	0	0.17	1	0	#N/A	#N/A	#N/A	#N/A	#N/A	#N/A	#N/A	#N/A	#N/A	#N/A	#N/A	#N/A	#N/A	#N/A	#N/A	#N/A	#N/A	#N/A
FBgn0035557	CG11353	-0.26	1	0	-0.9	1	0	-0.69	1	0	0.21	1	0	0.13	1	0	0.15	1	0	0.62	1	0	-0.13	1	0	0.25	1	0	0.000698	1	0	0.04	1	0	-0.37	0.8	0.09691	0.49	0.78	0.107905	0.26	1	0	0.23	1	0
FBgn0030375	CG11356	#N/A	#N/A	#N/A	#N/A	#N/A	#N/A	#N/A	#N/A	#N/A	0.03	1	0	3.76	0.8	0.09691	0.05	1	0	0.82	1	0	-2.36	0.96	0.0177288	-2.24	1	0	2.21	0.96	0.0177288	3.05	0.92	0.0362122	3.14	0.87	0.0604807	-1.4	0.95	0.0222764	-1.21	1	0	-0.49	1	0
FBgn0035558	CG11357	0.03	1	0	0.05	1	0	0.06	1	0	-0.07	1	0	-0.15	0.9	0.0457575	0.14	1	0	-0.05	1	0	0.15	0.96	0.0177288	0.02	1	0	0.08	0.99	0.00436481	0.15	0.87	0.0604807	0.07	1	0	-0.11	0.99	0.00436481	-0.2	0.99	0.00436481	-0.26	0.84	0.0757207
FBgn0035490	CG1136	-0.31	1	0	-0.57	1	0	-0.49	0.8	0.09691	-0.15	1	0	0.4	0.68	0.167491	-0.64	0.78	0.107905	-0.07	1	0	-0.47	0.96	0.0177288	-0.1	1	0	-0.44	0.25	0.60206	-0.09	1	0	-0.29	0.61	0.21467	-0.17	0.96	0.0177288	-0.15	1	0	0.06	1	0
FBgn0039920	CG11360	-0.22	1	0	-0.09	1	0	-0.09	1	0	0.16	1	0	0.12	0.92	0.0362122	-0.06	1	0	0.01	1	0	0.01	1	0	-0.16	1	0	-0.12	0.9	0.0457575	-0.03	1	0	-0.19	0.67	0.173925	-0.00719	1	0	0.02	1	0	-0.19	1	0
FBgn0034737	CG11362	0.88	0.52	0.283997	0.89	0.97	0.0132283	1.03	0.23	0.638272	0.86	1	0	1.75	0.82	0.0861861	1.27	1	0	-0.07	1	0	3.93	0.96	0.0177288	0.08	1	0	0.52	0.17	0.769551	0.58	0.12	0.920819	0.59	0.09	1.04576	0.1	1	0	0.31	0.8	0.09691	0.47	0.32	0.49485
FBgn0037185	CG11367	-0.07	1	0	0.02	1	0	0.00538	1	0	-0.23	1	0	-0.42	0.6	0.221849	0.12	1	0	0.06	1	0	0.3	0.94	0.0268721	0.06	1	0	-0.07	1	0	-0.08	1	0	0.02	1	0	0.14	0.96	0.0177288	-0.06	1	0	-0.01	1	0
FBgn0040923	CG11368	-0.58	1	0	-0.17	1	0	-0.75	0.87	0.0604807	0.29	1	0	0.5	0.73	0.136677	-0.36	1	0	-0.05	1	0	-0.67	0.91	0.0409586	-0.08	1	0	-0.39	0.48	0.318759	-0.16	0.96	0.0177288	-0.34	0.59	0.229148	-0.24	0.89	0.05061	-0.09	1	0	-0.006	1	0
FBgn0029951	CG11369	0.56	1	0	0.42	1	0	0.79	0.6	0.221849	3.42	0.73	0.136677	1.75	0.83	0.0809219	1.66	1	0	-3.24	1	0	0.37	1	0	-3.09	1	0	0.4	0.1	1	0.41	0.11	0.958607	0.4	0.1	1	0.29	0.8	0.09691	0.31	0.81	0.091515	0.37	0.58	0.236572
FBgn0037454	CG1137	0.85	0.44	0.356547	0.58	1	0	1.1	0.11	0.958607	-0.31	1	0	0.22	1	0	-0.28	1	0	1.19	1	0	-0.99	0.99	0.00436481	0.7	1	0	0.35	0.15	0.823909	0.33	0.25	0.60206	0.38	0.1	1	0.26	0.46	0.337242	0.23	0.66	0.180456	0.39	0.08	1.09691
FBgn0037181	CG11370	-0.65	0.64	0.19382	-0.55	1	0	-0.69	0.42	0.376751	-2.38	1	0	-2.27	0.9	0.0457575	-2.35	1	0	-1.41	1	0	-1.52	0.96	0.0177288	-0.36	1	0	0.67	1	0	-2.47	0.96	0.0177288	-0.09	1	0	-0.03	1	0	-0.68	1	0	-0.81	1	0
FBgn0040679	CG11373	0.99	0.56	0.251812	0.58	1	0	1.16	0.25	0.60206	2.41	1	0	0.13	1	0	2.31	1	0	-0.07	1	0	2.18	0.96	0.0177288	0.08	1	0	0.19	0.91	0.0409586	0.42	0.46	0.337242	0.45	0.32	0.49485	0.1	1	0	0.29	0.85	0.0705811	0.25	0.95	0.0222764
FBgn0031214	CG11374	-0.13	1	0	-0.2	1	0	-0.17	1	0	0.000554	1	0	0.24	0.95	0.0222764	-0.34	1	0	-0.69	1	0	-0.45	0.96	0.0177288	-0.4	1	0	-0.07	1	0	0.03	1	0	-0.02	1	0	-0.09	1	0	0.09	1	0	0.4	0.96	0.0177288
FBgn0031217	CG11377	-0.04	1	0	-0.04	1	0	-0.17	1	0	-0.06	1	0	-0.24	0.73	0.136677	0.00122	1	0	-0.03	1	0	0.26	0.74	0.130768	-0.00587	1	0	0.07	1	0	-0.03	1	0	0.02	1	0	0.12	0.99	0.00436481	-0.22	0.98	0.00877392	-0.25	0.94	0.0268721
FBgn0040364	CG11378	-1.37	0.06	1.22185	-1.28	0.12	0.920819	-1.42	0.02	1.69897	0.14	1	0	0.27	0.81	0.091515	0.00482	1	0	0.11	1	0	-0.49	0.87	0.0604807	-0.02	1	0	0.29	0.43	0.366532	-0.37	0.28	0.552842	-0.17	0.81	0.091515	-0.03	1	0	-0.26	0.91	0.0409586	-0.17	1	0
FBgn0040362	CG11379	0.67	1	0	0.35	1	0	0.66	0.94	0.0268721	0.00569	1	0	2.05	0.75	0.124939	-0.1	1	0	3.14	1	0	3.01	0.96	0.0177288	3.34	1	0	0.04	1	0	0.00543	1	0	0.1	0.99	0.00436481	0.11	1	0	0.21	1	0	0.37	0.81	0.091515
FBgn0037456	CG1138	0.58	1	0	0.14	1	0	0.58	0.86	0.0655015	#N/A	#N/A	#N/A	#N/A	#N/A	#N/A	#N/A	#N/A	#N/A	-0.04	1	0	-0.14	1	0	-2.24	1	0	0.06	1	0	-0.03	1	0	0.17	0.89	0.05061	0.19	0.94	0.0268721	0.27	0.88	0.0555173	0.47	0.31	0.508638
FBgn0040359	CG11380	-0.24	1	0	-0.44	1	0	0.1	1	0	-0.65	1	0	0.08	1	0	-1	1	0	0.3	1	0	-1.56	0.79	0.102373	-0.49	1	0	1.03	0.47	0.327902	-0.13	1	0	-4.12	0.09	1.04576	1.66	0.81	0.091515	2.94	0.23	0.638272	0.57	1	0
FBgn0029568	CG11381	-0.1	1	0	-2.25	1	0	-2.45	1	0	-1.35	4.6e-05	4.33724	-0.21	0.9	0.0457575	0.69	0.38	0.420216	0.3	1	0	0.53	0.58	0.236572	0.35	1	0	-4.24	0.71	0.148742	-0.2	1	0	-1.87	0.8	0.09691	8.65	0.000144	3.84164	5.77	0.05	1.30103	1.96	1	0
FBgn0040367	CG11382	-0.25	1	0	-0.85	1	0	-0.09	1	0	0.39	1	0	0.65	0.45	0.346787	0.56	1	0	0.56	1	0	0.52	0.96	0.0177288	0.37	1	0	-1.03	0.98	0.00877392	-1.04	0.99	0.00436481	-0.1	1	0	3.05	0.6	0.221849	0.22	1	0	-2.25	1	0
FBgn0040363	CG11384	-3.68	0.1	1	-5.33	0.08	1.09691	-4.61	0.03	1.52288	0.14	1	0	0.94	0.69	0.161151	-0.78	1	0	0.58	1	0	-0.01	1	0	0.44	1	0	0.45	0.97	0.0132283	0.58	0.96	0.0177288	-0.62	0.94	0.0268721	-0.16	1	0	-0.21	1	0	-0.68	0.96	0.0177288
FBgn0034959	CG11388	0.12	1	0	0.13	1	0	-0.02	1	0	0.23	1	0	0.26	0.84	0.0757207	0.23	1	0	0.14	1	0	-0.35	0.96	0.0177288	0.15	1	0	-0.14	0.96	0.0177288	0.01	1	0	-0.01	1	0	-0.28	0.92	0.0362122	-0.23	1	0	-0.21	1	0
FBgn0035300	CG1139	0.25	1	0	-0.01	1	0	0.13	1	0	0.35	1	0	-0.23	0.94	0.0268721	-0.64	1	0	0.36	1	0	-0.0064	1	0	0.44	1	0	0.39	0.5	0.30103	-0.23	0.87	0.0604807	0.18	0.91	0.0409586	0.24	0.92	0.0362122	-0.11	1	0	0.26	0.97	0.0132283
FBgn0038732	CG11391	2.28	1	0	2.39	1	0	3.65	0.93	0.0315171	-0.06	1	0	0.34	0.86	0.0655015	-0.27	1	0	0.36	1	0	-0.89	0.76	0.119186	0.2	1	0	-0.13	0.98	0.00877392	0.16	0.96	0.0177288	-0.2	0.88	0.0555173	-0.46	0.77	0.113509	0.05	1	0	-0.23	1	0
FBgn0034200	CG11395	-0.1	1	0	0.1	1	0	-0.09	1	0	0.14	1	0	0.4	0.44	0.356547	-0.35	1	0	-0.17	1	0	-0.31	0.96	0.0177288	-0.11	1	0	-0.1	0.97	0.0132283	-0.18	0.85	0.0705811	-0.09	0.97	0.0132283	-0.22	0.94	0.0268721	-0.16	1	0	-0.07	1	0
FBgn0037022	CG11396	-0.1	1	0	0.12	1	0	-0.04	1	0	-0.15	1	0	-0.25	0.78	0.107905	0.04	1	0	0.01	1	0	0.07	1	0	0.08	1	0	-0.05	1	0	-0.2	0.91	0.0409586	0.02	1	0	0.17	0.96	0.0177288	0.09	1	0	0.02	1	0
FBgn0040366	CG11398	0.22	1	0	0.04	1	0	0.18	1	0	0.00868	1	0	-0.33	0.71	0.148742	0.3	1	0	0.15	1	0	0.3	0.93	0.0315171	0.18	1	0	0.05	1	0	-0.00737	1	0	0.14	0.99	0.00436481	0.48	0.91	0.0409586	-0.32	1	0	-0.23	1	0
FBgn0037021	CG11399	-0.13	1	0	-0.2	1	0	0.00224	1	0	-0.11	1	0	-0.2	0.83	0.0809219	0.08	1	0	-0.17	1	0	-0.06	1	0	-0.08	1	0	-0.15	0.84	0.0757207	-0.1	0.96	0.0177288	-0.13	0.88	0.0555173	0.22	0.92	0.0362122	0.07	1	0	-0.18	1	0
FBgn0034198	CG11400	0.13	1	0	-0.2	1	0	0.21	1	0	0.21	1	0	0.29	0.67	0.173925	-0.37	1	0	-0.26	1	0	-0.37	0.94	0.0268721	-0.18	1	0	-0.11	0.94	0.0268721	-0.06	1	0	-0.01	1	0	-0.3	0.3	0.522879	-0.27	0.46	0.337242	-0.15	0.98	0.00877392
FBgn0026876	CG11403	-0.17	1	0	-0.17	1	0	-0.34	1	0	-0.4	1	0	-0.72	0.1	1	0.07	1	0	-0.04	1	0	0.18	0.96	0.0177288	0.13	1	0	-0.38	0.81	0.091515	-0.28	0.95	0.0222764	0.23	0.94	0.0268721	1.13	0.44	0.356547	0.26	1	0	-0.12	1	0
FBgn0037169	CG11404	0.93	0.58	0.236572	0.71	1	0	1.05	0.3	0.522879	0.03	1	0	3.23	0.84	0.0757207	0.05	1	0	#N/A	#N/A	#N/A	#N/A	#N/A	#N/A	#N/A	#N/A	#N/A	0.4	0.42	0.376751	0.28	0.77	0.113509	0.48	0.22	0.657577	0.28	0.89	0.05061	0.27	0.96	0.0177288	0.36	0.76	0.119186
FBgn0034990	CG11406	3.92	0.28	0.552842	2.72	1	0	3.5	0.24	0.619789	0.00372	1	0	-0.02	1	0	0.8	1	0	-0.42	1	0	-1.07	0.96	0.0177288	-1.6	1	0	-0.07	1	0	-1.3	0.78	0.107905	0.51	0.96	0.0177288	-0.26	1	0	0.07	1	0	-0.64	1	0
FBgn0038733	CG11407	-0.92	1	0	-0.21	1	0	-1.99	0.32	0.49485	0.07	1	0	0.15	0.96	0.0177288	-0.37	1	0	-0.41	1	0	-0.62	0.78	0.107905	-0.36	1	0	-0.09	0.98	0.00877392	-0.08	1	0	-0.11	0.94	0.0268721	-0.24	0.85	0.0705811	-0.27	0.83	0.0809219	-0.34	0.57	0.244125
FBgn0024366	CG11409	-0.54	1	0	-0.21	1	0	-0.3	1	0	-0.26	1	0	0.41	0.81	0.091515	-0.14	1	0	0.37	1	0	-0.3	0.99	0.00436481	0.00879	1	0	0.07	1	0	-0.4	0.71	0.148742	-0.06	1	0	-0.09	1	0	-0.01	1	0	-0.36	1	0
FBgn0024362	CG11412	0.02	1	0	-0.05	1	0	0.01	1	0	-0.09	1	0	-0.07	1	0	0.02	1	0	-0.07	1	0	0.06	1	0	-0.04	1	0	-0.18	0.83	0.0809219	-0.04	1	0	-0.13	0.93	0.0315171	0.13	0.96	0.0177288	-0.02	1	0	-0.02	1	0
FBgn0035022	CG11413	0.14	1	0	-2.08	1	0	-0.81	1	0	0.54	1	0	0.71	0.9	0.0457575	-0.81	1	0	-0.57	1	0	-0.56	1	0	-0.68	1	0	-1.13	0.56	0.251812	-0.56	0.92	0.0362122	-0.76	0.78	0.107905	-0.27	1	0	-0.24	1	0	-0.12	1	0
FBgn0035024	CG11414	0.01	1	0	0.08	1	0	0.07	1	0	-0.11	1	0	-0.12	0.9	0.0457575	0.05	1	0	-0.11	1	0	-0.02	1	0	-0.05	1	0	0.0005	1	0	-0.04	1	0	-0.05	1	0	0.16	0.88	0.0555173	0.17	0.88	0.0555173	0.13	1	0
FBgn0024364	CG11417	-0.27	1	0	-0.13	1	0	-0.17	1	0	0.05	1	0	-0.05	1	0	0.17	1	0	0.02	1	0	0.13	0.96	0.0177288	0.12	1	0	-0.14	0.96	0.0177288	0.02	1	0	0.09	1	0	0.42	0.59	0.229148	-0.03	1	0	-0.09	1	0
FBgn0024360	CG11418	-0.27	1	0	-0.22	1	0	-0.03	1	0	-0.04	1	0	-0.24	0.82	0.0861861	0.17	1	0	0.04	1	0	0.14	0.96	0.0177288	0.11	1	0	0.23	0.76	0.119186	0.14	0.96	0.0177288	0.22	0.79	0.102373	0.17	0.97	0.0132283	0.07	1	0	0.06	1	0
FBgn0037504	CG1142	-0.13	1	0	-0.09	1	0	-0.14	1	0	0.12	1	0	0.00818	1	0	0.15	1	0	-0.1	1	0	0.13	0.97	0.0132283	0.05	1	0	-0.09	1	0	-0.04	1	0	-0.31	0.55	0.259637	0.26	0.96	0.0177288	-0.1	1	0	-0.05	1	0
FBgn0034251	CG11423	0.59	0.97	0.0132283	0.7	1	0	0.79	0.46	0.337242	0.46	1	0	0.49	0.9	0.0457575	0.19	1	0	-0.34	1	0	-0.69	0.96	0.0177288	-0.29	1	0	0.4	0.1	1	0.3	0.42	0.376751	0.34	0.23	0.638272	0.22	0.92	0.0362122	0.27	0.9	0.0457575	0.4	0.52	0.283997
FBgn0037167	CG11425	-0.39	1	0	-1.02	1	0	-0.88	0.68	0.167491	0.39	1	0	0.5	0.9	0.0457575	-0.66	1	0	-0.03	1	0	0.34	1	0	0.28	1	0	-0.15	1	0	-0.46	0.92	0.0362122	-0.5	0.87	0.0604807	-0.41	0.96	0.0177288	0.76	0.69	0.161151	0.21	1	0
FBgn0037166	CG11426	-0.36	1	0	-0.46	1	0	-0.75	0.55	0.259637	0.01	1	0	0.25	0.9	0.0457575	-0.08	1	0	0.04	1	0	-0.25	0.96	0.0177288	-0.21	1	0	-0.05	1	0	-0.24	0.67	0.173925	-0.15	0.87	0.0604807	-0.15	0.96	0.0177288	0.08	1	0	-0.09	1	0
FBgn0035359	CG1143	-0.02	1	0	-0.46	1	0	-0.56	0.43	0.366532	0.4	1	0	0.46	0.57	0.244125	-0.14	1	0	0.57	1	0	-0.16	1	0	0.16	1	0	-0.11	0.97	0.0132283	-0.13	0.97	0.0132283	-0.06	1	0	0.15	0.96	0.0177288	0.12	1	0	0.08	1	0
FBgn0029713	CG11436	-0.26	1	0	-0.19	1	0	-0.32	1	0	-0.07	1	0	-0.28	0.78	0.107905	0.2	1	0	-0.00937	1	0	0.28	0.96	0.0177288	0.07	1	0	-0.11	1	0	0.11	1	0	-0.08	1	0	0.57	0.74	0.130768	0.05	1	0	0.17	1	0
FBgn0037165	CG11437	3.07	0.5	0.30103	1.76	1	0	1.27	1	0	-0.13	1	0	0.78	0.9	0.0457575	-0.05	1	0	0.44	1	0	0.09	1	0	0.42	1	0	0.1	1	0	0.29	1	0	0.08	1	0	-0.49	0.96	0.0177288	0.11	1	0	-0.48	1	0
FBgn0037164	CG11438	0.29	1	0	-0.05	1	0	0.07	1	0	-0.44	1	0	-0.33	0.99	0.00436481	-0.74	1	0	-0.53	1	0	-1.08	0.78	0.107905	-0.49	1	0	0.46	0.36	0.443697	0.14	0.97	0.0132283	0.33	0.64	0.19382	-0.07	1	0	0.1	1	0	0.17	1	0
FBgn0029715	CG11444	-0.02	1	0	-0.11	1	0	-0.12	1	0	0.00319	1	0	-0.05	1	0	0.09	1	0	-0.04	1	0	0.18	0.96	0.0177288	0.12	1	0	0.04	1	0	0.17	0.82	0.0861861	0.07	1	0	0.3	0.58	0.236572	0.12	1	0	0.1	1	0
FBgn0038737	CG11447	0.1	1	0	0.16	1	0	0.00314	1	0	-0.12	1	0	-0.04	1	0	-0.04	1	0	0.32	1	0	0.37	0.96	0.0177288	0.13	1	0	-0.02	1	0	0.07	1	0	-0.09	1	0	0.07	1	0	0.03	1	0	-0.25	1	0
FBgn0024985	CG11448	-0.13	1	0	-0.09	1	0	-0.19	1	0	-0.1	1	0	0.00246	1	0	0.15	1	0	-0.04	1	0	0.01	1	0	-0.00011	1	0	-0.08	1	0	-0.17	0.92	0.0362122	-0.19	0.87	0.0604807	-0.01	1	0	-0.15	1	0	-0.18	1	0
FBgn0037162	CG11449	#N/A	#N/A	#N/A	#N/A	#N/A	#N/A	#N/A	#N/A	#N/A	0.03	1	0	2.39	0.9	0.0457575	0.05	1	0	-3.24	1	0	-3.21	0.96	0.0177288	-3.09	1	0	3.59	0.82	0.0861861	2.2	0.97	0.0132283	3.14	0.87	0.0604807	2.26	0.96	0.0177288	0.07	1	0	2.32	1	0
FBgn0038734	CG11453	-1.11	0.38	0.420216	-0.43	1	0	-1.49	0.06	1.22185	0.15	1	0	0.34	0.88	0.0555173	-0.19	1	0	-0.12	1	0	-0.21	1	0	0.09	1	0	0.11	1	0	0.06	1	0	-0.01	1	0	0.17	0.98	0.00877392	-0.18	1	0	-0.38	0.88	0.0555173
FBgn0031224	CG11454	0.17	1	0	0.2	1	0	-0.04	1	0	-0.2	1	0	-0.1	1	0	-0.03	1	0	-0.78	0.35	0.455932	-1.01	0.01	2	-1.14	0.00446	2.35067	0.13	0.95	0.0222764	0.03	1	0	0.12	0.94	0.0268721	0.22	0.96	0.0177288	0.4	0.78	0.107905	0.26	1	0
FBgn0031228	CG11455	0.17	1	0	0.2	1	0	-0.17	1	0	0.23	1	0	0.34	0.54	0.267606	0.04	1	0	-0.08	1	0	-0.04	1	0	0.08	1	0	0.06	1	0	0.16	0.83	0.0809219	-0.07	0.99	0.00436481	0.07	1	0	0.31	0.29	0.537602	0.32	0.23	0.638272
FBgn0037031	CG11456	0.13	1	0	0.14	1	0	0.23	1	0	-0.17	1	0	-0.16	0.91	0.0409586	0.06	1	0	-0.11	1	0	0.13	0.97	0.0132283	-0.07	1	0	-0.04	1	0	0.07	1	0	0.04	1	0	-0.02	1	0	-0.24	1	0	-0.08	1	0
FBgn0040637	CG11458	#N/A	#N/A	#N/A	#N/A	#N/A	#N/A	#N/A	#N/A	#N/A	0.04	1	0	1.08	0.54	0.267606	-0.32	1	0	-0.65	1	0	-1.35	0.96	0.0177288	-1.27	1	0	-0.32	0.99	0.00436481	0.48	0.93	0.0315171	-0.92	0.67	0.173925	0.09	1	0	1.17	0.59	0.229148	1.64	0.15	0.823909
FBgn0037396	CG11459	-0.4	1	0	-0.56	1	0	-0.31	1	0	0.32	1	0	1.03	0.18	0.744727	-0.12	1	0	-0.47	1	0	-0.23	1	0	-0.06	1	0	-0.45	0.72	0.142668	-0.87	0.23	0.638272	-0.8	0.26	0.585027	-1.83	4.21e-05	4.37572	-1.24	0.02	1.69897	0.07	1	0
FBgn0035346	CG1146	0.07	1	0	0.01	1	0	0.22	1	0	0.01	1	0	0.00314	1	0	-0.11	1	0	-0.11	1	0	-0.15	0.96	0.0177288	-0.11	1	0	-0.04	1	0	-0.00486	1	0	0.06	1	0	-0.01	1	0	-0.00629	1	0	0.11	1	0
FBgn0039671	CG11470	-0.58	0.63	0.200659	-0.44	1	0	-0.69	0.3	0.522879	1.78	1	0	-0.00771	1	0	1.66	1	0	3.14	1	0	-0.04	1	0	2.48	1	0	-3.32	0.84	0.0757207	-1.04	0.99	0.00436481	0.43	1	0	-1.46	0.96	0.0177288	-0.42	1	0	-0.56	1	0
FBgn0034688	CG11474	0.07	1	0	0.02	1	0	-0.09	1	0	-0.18	1	0	-0.24	0.77	0.113509	-0.06	1	0	-0.00359	1	0	0.08	1	0	0.04	1	0	-0.00329	1	0	0.05	1	0	0.1	0.94	0.0268721	0.05	1	0	0.11	1	0	0.09	1	0
FBgn0034687	CG11475	0.85	0.59	0.229148	0.62	1	0	0.72	0.62	0.207608	-0.29	1	0	-0.29	1	0	-0.56	1	0	0.31	1	0	0.05	1	0	0.4	1	0	0.11	0.99	0.00436481	0.16	0.96	0.0177288	0.22	0.86	0.0655015	0.2	0.93	0.0315171	0.25	0.92	0.0362122	0.37	0.59	0.229148
FBgn0035397	CG11486	-0.17	1	0	0.05	1	0	-0.27	1	0	0.03	1	0	-0.05	1	0	0.14	1	0	0.03	1	0	0.11	0.96	0.0177288	0.0025	1	0	0.000274	1	0	-0.02	1	0	-0.06	1	0	0.12	1	0	0.02	1	0	-0.05	1	0
FBgn0039749	CG11498	-0.98	1	0	0.1	1	0	0.22	1	0	-0.21	1	0	0.08	1	0	-0.58	1	0	0.42	1	0	-1.5	0.96	0.0177288	-0.48	1	0	0.02	1	0	0.15	1	0	-0.12	1	0	-0.16	1	0	0.03	1	0	0.07	1	0
FBgn0039733	CG11504	0.33	1	0	0.15	1	0	0.18	1	0	-0.15	1	0	-0.23	0.87	0.0604807	0.1	1	0	0.00446	1	0	0.2	0.96	0.0177288	-0.00732	1	0	0.04	1	0	-0.27	0.84	0.0757207	-0.12	0.99	0.00436481	0.25	0.96	0.0177288	0.12	1	0	0.00267	1	0
FBgn0035424	CG11505	-0.05	1	0	0.02	1	0	0.01	1	0	-0.05	1	0	-0.09	0.99	0.00436481	0.1	1	0	-0.1	1	0	-0.05	1	0	-0.08	1	0	0.2	0.72	0.142668	0.09	0.98	0.00877392	0.00579	1	0	0.03	1	0	0.06	1	0	-0.02	1	0
FBgn0029584	CG11509	-0.1	1	0	0.22	1	0	0.12	1	0	0.41	1	0	0.51	0.91	0.0409586	-1.2	1	0	-0.8	1	0	-0.16	1	0	-0.29	1	0	-1.71	0.38	0.420216	-0.57	0.96	0.0177288	-0.95	0.76	0.119186	-0.19	1	0	0.02	1	0	-0.42	1	0
FBgn0037156	CG11523	-0.06	1	0	-0.25	1	0	0.06	1	0	-0.07	1	0	-0.22	0.84	0.0757207	0.14	1	0	0.04	1	0	0.14	0.96	0.0177288	0.08	1	0	-0.16	0.91	0.0409586	0.04	1	0	-0.2	0.81	0.091515	0.25	0.96	0.0177288	0.07	1	0	0.07	1	0
FBgn0036264	CG11529	0.49	1	0	0.2	1	0	0.43	0.99	0.00436481	0.12	1	0	0.43	0.86	0.0655015	0.16	1	0	0.28	1	0	-0.45	1	0	-0.58	1	0	-0.02	1	0	-0.35	0.42	0.376751	0.15	0.88	0.0555173	-0.67	0.61	0.21467	-0.01	1	0	-0.28	1	0
FBgn0046296	CG11534	0.03	1	0	0.09	1	0	0.12	1	0	-0.23	1	0	-0.27	0.83	0.0809219	0.09	1	0	-0.08	1	0	0.1	1	0	0.03	1	0	0.0033	1	0	-0.08	1	0	0.02	1	0	-0.22	0.92	0.0362122	-0.27	0.91	0.0409586	-0.2	1	0
FBgn0035400	CG11537	-0.14	1	0	-0.12	1	0	-0.28	0.97	0.0132283	0.05	1	0	0.02	1	0	-0.02	1	0	-0.04	1	0	-0.05	1	0	-0.12	1	0	-0.04	1	0	-0.07	1	0	-0.00366	1	0	0.08	0.98	0.00877392	0.14	0.97	0.0132283	0.14	0.98	0.00877392
FBgn0039859	CG11539	0.1	1	0	0.15	1	0	0.25	1	0	-0.18	1	0	-0.16	0.99	0.00436481	-0.08	1	0	0.16	1	0	0.4	0.96	0.0177288	0.11	1	0	0.12	1	0	0.04	1	0	0.06	1	0	0.07	1	0	-0.03	1	0	-0.04	1	0
FBgn0039864	CG11550	0.32	1	0	0.33	1	0	0.07	1	0	0.2	1	0	0.34	0.9	0.0457575	-0.41	1	0	0.53	1	0	0.09	1	0	0.2	1	0	-0.3	0.54	0.267606	-0.31	0.56	0.251812	-0.28	0.57	0.244125	-0.1	1	0	-0.13	1	0	-0.14	1	0
FBgn0086856	CG11555	-0.23	1	0	-0.24	1	0	-0.19	1	0	-0.05	1	0	-0.11	0.96	0.0177288	0.09	1	0	-0.05	1	0	0.11	1	0	-0.09	1	0	-0.39	0.58	0.236572	-0.07	1	0	-0.38	0.59	0.229148	0.36	0.89	0.05061	0.01	1	0	-0.09	1	0
FBgn0036249	CG11560	-0.03	1	0	-0.12	1	0	-0.07	1	0	-0.37	1	0	-0.51	0.44	0.356547	-0.12	1	0	0.08	1	0	0.27	0.96	0.0177288	0.21	1	0	-0.05	1	0	0.2	0.96	0.0177288	-0.01	1	0	0.16	1	0	-0.02	1	0	0.05	1	0
FBgn0031247	CG11562	0.16	1	0	0.16	1	0	0.27	1	0	-0.02	1	0	0.02	1	0	0.17	1	0	0.14	1	0	0.4	0.77	0.113509	0.13	1	0	0.12	0.95	0.0222764	0.11	0.97	0.0132283	0.17	0.85	0.0705811	0.3	0.59	0.229148	0.36	0.4	0.39794	0.31	0.52	0.283997
FBgn0039868	CG11563	-0.2	1	0	0.05	1	0	-0.25	1	0	0.07	1	0	-0.09	1	0	0.07	1	0	-0.02	1	0	0.18	0.96	0.0177288	0.13	1	0	-0.15	0.96	0.0177288	0.08	1	0	-0.23	0.87	0.0604807	0.3	0.96	0.0177288	-0.32	1	0	-0.21	1	0
FBgn0031159	CG11566	-2.15	0.7	0.154902	-0.58	1	0	-0.12	1	0	0.85	1	0	1.73	0.47	0.327902	1.42	1	0	1.05	1	0	-0.93	0.96	0.0177288	-0.6	1	0	-0.23	1	0	-0.39	0.95	0.0222764	-0.59	0.77	0.113509	0.52	0.9	0.0457575	-0.51	1	0	0.42	1	0
FBgn0036230	CG11570	#N/A	#N/A	#N/A	#N/A	#N/A	#N/A	#N/A	#N/A	#N/A	-3.23	1	0	-0.02	1	0	-3.2	1	0	#N/A	#N/A	#N/A	#N/A	#N/A	#N/A	#N/A	#N/A	#N/A	0.35	1	0	1.28	0.9	0.0457575	0.82	0.97	0.0132283	-2.09	0.8	0.09691	-0.12	1	0	-1.19	1	0
FBgn0039882	CG11576	0.3	1	0	-0.06	1	0	-0.17	1	0	0.16	1	0	0.11	0.97	0.0132283	0.01	1	0	-0.00335	1	0	-0.00591	1	0	0.04	1	0	0.2	0.67	0.173925	-0.00183	1	0	0.09	0.96	0.0177288	-0.06	1	0	0.02	1	0	-0.06	1	0
FBgn0036847	CG11577	-0.05	1	0	-0.07	1	0	0.06	1	0	-0.01	1	0	-0.25	0.8	0.09691	0.27	1	0	-0.01	1	0	0.27	0.96	0.0177288	0.14	1	0	-0.19	0.89	0.05061	-0.14	0.97	0.0132283	0.12	0.98	0.00877392	0.12	1	0	-0.16	1	0	-0.09	1	0
FBgn0030540	CG11581	-4.22	1	0	-4.06	1	0	-1.93	0.97	0.0132283	#N/A	#N/A	#N/A	#N/A	#N/A	#N/A	#N/A	#N/A	#N/A	-0.04	1	0	-2.36	0.96	0.0177288	-2.24	1	0	3.06	0.88	0.0555173	-0.09	1	0	2.29	0.94	0.0268721	0.82	1	0	1.55	1	0	0.03	1	0
FBgn0035524	CG11583	-0.18	1	0	-0.15	1	0	0.00928	1	0	-0.1	1	0	0.02	1	0	0.07	1	0	-0.02	1	0	0.09	0.96	0.0177288	0.06	1	0	-0.1	1	0	-0.08	1	0	-0.22	0.82	0.0861861	0.8	0.21	0.677781	0.25	1	0	0.15	1	0
FBgn0030541	CG11584	0.6	1	0	-0.02	1	0	1.5	0.5	0.30103	-0.96	1	0	-1.81	0.84	0.0757207	-4.15	1	0	0.18	1	0	-2.81	0.19	0.721246	-0.91	1	0	-2.47	0.94	0.0268721	-2.47	0.96	0.0177288	-2.41	0.94	0.0268721	3.11	0.92	0.0362122	0.07	1	0	-0.00902	1	0
FBgn0030543	CG11585	0.06	1	0	-0.26	1	0	-2.46	0.7	0.154902	#N/A	#N/A	#N/A	#N/A	#N/A	#N/A	#N/A	#N/A	#N/A	#N/A	#N/A	#N/A	#N/A	#N/A	#N/A	#N/A	#N/A	#N/A	-0.09	1	0	-0.09	1	0	2.29	0.94	0.0268721	-0.03	1	0	2.45	1	0	2.32	1	0
FBgn0035520	CG11586	0.24	1	0	0.17	1	0	0.15	1	0	-0.00141	1	0	-0.17	0.9	0.0457575	0.19	1	0	0.04	1	0	0.2	0.96	0.0177288	0.1	1	0	0.25	0.74	0.130768	0.18	0.92	0.0362122	0.09	1	0	0.28	0.92	0.0362122	0.08	1	0	0.05	1	0
FBgn0036221	CG11588	1.13	0.25	0.60206	0.84	0.99	0.00436481	1.16	0.12	0.920819	-3.23	1	0	-3.13	0.84	0.0757207	-0.11	1	0	#N/A	#N/A	#N/A	#N/A	#N/A	#N/A	#N/A	#N/A	#N/A	0.36	0.39	0.408935	0.31	0.59	0.229148	0.35	0.38	0.420216	0.34	0.54	0.267606	0.45	0.26	0.585027	0.45	0.23	0.638272
FBgn0030545	CG11590	-0.02	1	0	-0.15	1	0	0.26	1	0	-0.4	1	0	-0.28	0.84	0.0757207	-0.00645	1	0	0.1	1	0	0.18	0.96	0.0177288	0.14	1	0	0.08	1	0	-0.37	0.43	0.366532	0.22	0.75	0.124939	-0.03	1	0	0.00815	1	0	0.000461	1	0
FBgn0035488	CG11593	-0.05	1	0	-0.06	1	0	0.00208	1	0	-0.11	1	0	-0.29	0.7	0.154902	0.11	1	0	-0.08	1	0	0.13	0.96	0.0177288	0.00303	1	0	0.06	1	0	-0.11	0.99	0.00436481	0.1	0.99	0.00436481	0.15	0.97	0.0132283	-0.08	1	0	-0.11	1	0
FBgn0035484	CG11594	0.2	1	0	-0.15	1	0	-0.51	0.62	0.207608	0.28	1	0	0.22	0.83	0.0809219	-0.25	1	0	-0.39	1	0	-0.31	0.88	0.0555173	-0.18	1	0	-0.23	0.52	0.283997	-0.4	0.07	1.1549	0.0053	1	0	-0.35	0.58	0.236572	-0.14	1	0	-0.04	1	0
FBgn0023522	CG11596	-0.12	1	0	-0.12	1	0	-0.11	1	0	0.04	1	0	-0.01	1	0	0.06	1	0	-0.00945	1	0	0.08	0.98	0.00877392	0.1	1	0	-0.22	0.83	0.0809219	-0.2	0.9	0.0457575	-0.33	0.57	0.244125	0.32	0.8	0.09691	-0.08	1	0	-0.07	1	0
FBgn0036212	CG11597	0.22	1	0	0.25	1	0	0.52	0.82	0.0861861	0.27	1	0	0.18	1	0	-0.03	1	0	-0.14	1	0	-0.3	0.96	0.0177288	-0.17	1	0	-0.09	1	0	-0.12	0.98	0.00877392	0.09	1	0	-0.15	1	0	0.05	1	0	0.00243	1	0
FBgn0038067	CG11598	-0.1	1	0	1.38	1	0	0.74	1	0	-1.22	1	0	-0.72	0.93	0.0315171	-1.34	1	0	-0.56	1	0	-3.74	0.96	0.0177288	0.17	1	0	0.09	0.96	0.0177288	-0.22	0.65	0.187087	0.1	0.94	0.0268721	-0.29	0.34	0.468521	-0.39	0.09	1.04576	-0.18	0.84	0.0757207
FBgn0038068	CG11600	-2.41	1	0	-2.25	1	0	-2.45	1	0	-4.15	1	0	-1.79	0.83	0.0809219	-1.04	1	0	3.14	1	0	-0.04	1	0	0.08	1	0	-0.52	0.66	0.180456	-0.73	0.44	0.356547	-0.35	0.86	0.0655015	-0.54	0.88	0.0555173	-0.4	1	0	0.08	1	0
FBgn0031244	CG11601	-0.16	1	0	-0.27	1	0	0.02	1	0	0.02	1	0	0.02	1	0	0.13	1	0	0.16	1	0	0.11	1	0	0.19	1	0	-0.1	0.97	0.0132283	-0.14	0.96	0.0177288	-0.02	1	0	-0.16	0.96	0.0177288	-0.12	1	0	-0.07	1	0
FBgn0038069	CG11608	2.28	1	0	0.13	1	0	2.27	1	0	0.03	1	0	2.39	0.9	0.0457575	0.05	1	0	#N/A	#N/A	#N/A	#N/A	#N/A	#N/A	#N/A	#N/A	#N/A	0.05	1	0	-0.45	0.28	0.552842	0.15	0.91	0.0409586	-0.47	0.26	0.585027	-0.28	0.84	0.0757207	-0.15	1	0
FBgn0037313	CG1161	0.02	1	0	0.02	1	0	-0.07	1	0	0.05	1	0	0.16	0.9	0.0457575	0.09	1	0	-0.04	1	0	0.14	0.96	0.0177288	0.04	1	0	-0.07	1	0	-0.08	1	0	-0.03	1	0	0.02	1	0	-0.02	1	0	-0.09	1	0
FBgn0031232	CG11617	0.11	1	0	-0.41	1	0	0.02	1	0	-0.02	1	0	0.47	0.7	0.154902	-0.65	1	0	-0.41	1	0	-0.8	0.84	0.0757207	-0.47	1	0	-0.24	0.77	0.113509	0.08	1	0	-0.52	0.17	0.769551	-0.3	0.91	0.0409586	-0.06	1	0	-0.00264	1	0
FBgn0036836	CG11619	-0.28	1	0	-0.35	1	0	-0.19	1	0	-0.14	1	0	0.31	0.92	0.0362122	-0.3	1	0	-0.05	1	0	-0.37	0.96	0.0177288	0.000968	1	0	-1.03	0.00886	2.05257	-0.16	0.97	0.0132283	-0.78	0.09	1.04576	-0.3	0.96	0.0177288	-0.18	1	0	-0.24	1	0
FBgn0038705	CG11626	0.51	1	0	-0.18	1	0	0.4	1	0	0.49	1	0	0.14	1	0	-1.81	1	0	1.45	1	0	-3.21	0.96	0.0177288	-3.09	1	0	0.24	1	0	-0.2	1	0	-0.02	1	0	-0.19	1	0	0.11	1	0	0.25	1	0
FBgn0032965	CG11629	1.44	0.55	0.259637	0.93	1	0	1.47	0.37	0.431798	4.18	1	0	4.15	0.75	0.124939	3.67	1	0	2.28	1	0	-0.04	1	0	0.08	1	0	-0.2	0.91	0.0409586	-0.43	0.56	0.251812	-0.19	0.92	0.0362122	0.08	1	0	0.2	1	0	0.24	1	0
FBgn0032964	CG11630	1.19	0.44	0.356547	0.7	1	0	1.18	0.29	0.537602	-0.63	1	0	0.3	1	0	-0.00674	1	0	-0.03	1	0	-0.85	0.96	0.0177288	-0.13	1	0	0.58	0.05	1.30103	0.61	0.05	1.30103	0.6	0.05	1.30103	0.46	0.78	0.107905	0.37	0.96	0.0177288	0.55	0.62	0.207608
FBgn0032968	CG11634	1.4	0.37	0.431798	1.08	1	0	1.46	0.21	0.677781	#N/A	#N/A	#N/A	#N/A	#N/A	#N/A	#N/A	#N/A	#N/A	-1.41	1	0	-3.74	0.96	0.0177288	-3.62	1	0	0.25	0.58	0.236572	0.33	0.4	0.39794	0.47	0.06	1.22185	0.15	0.97	0.0132283	0.26	0.95	0.0222764	0.43	0.48	0.318759
FBgn0033283	CG11635	0.99	0.58	0.236572	0.43	1	0	0.68	0.82	0.0861861	-0.87	1	0	-0.23	1	0	-0.1	1	0	-0.03	1	0	0.39	1	0	-0.21	1	0	0.17	0.79	0.102373	0.13	0.92	0.0362122	0.31	0.3	0.522879	0.23	0.84	0.0757207	0.19	0.99	0.00436481	0.27	0.77	0.113509
FBgn0040351	CG11638	-0.23	1	0	-0.25	1	0	-0.08	1	0	0.15	1	0	0.44	0.8	0.09691	-0.21	1	0	0.31	1	0	-0.18	1	0	-0.09	1	0	0.01	1	0	0.02	1	0	0.03	1	0	0.05	1	0	-0.14	1	0	-0.07	1	0
FBgn0036194	CG11652	0.07	1	0	-0.09	1	0	0.11	1	0	-0.13	1	0	-0.23	0.8	0.09691	0.14	1	0	0.05	1	0	0.2	0.95	0.0222764	0.16	1	0	0.19	0.78	0.107905	0.04	1	0	0.00769	1	0	-0.04	1	0	-0.3	0.71	0.148742	-0.25	0.85	0.0705811
FBgn0030638	CG11655	0.03	1	0	-0.15	1	0	-0.14	1	0	-0.17	1	0	-0.15	0.9	0.0457575	0.03	1	0	0.08	1	0	0.14	0.96	0.0177288	0.23	1	0	-0.01	1	0	-0.24	0.66	0.180456	0.00631	1	0	-0.1	1	0	-0.15	1	0	-0.08	1	0
FBgn0038109	CG11656	1.07	0.32	0.49485	0.75	1	0	0.9	0.33	0.481486	-3.77	1	0	-1.4	0.89	0.05061	-3.74	1	0	-0.88	1	0	-3.21	0.96	0.0177288	-3.09	1	0	0.44	0.06	1.22185	0.31	0.39	0.408935	0.52	0.01	2	0.17	0.93	0.0315171	0.27	0.79	0.102373	0.27	0.76	0.119186
FBgn0036196	CG11658	0.16	1	0	0.11	1	0	0.16	1	0	0.00675	1	0	0.16	0.9	0.0457575	-0.24	1	0	0.07	1	0	-0.16	0.96	0.0177288	0.04	1	0	-0.17	0.75	0.124939	-0.13	0.91	0.0409586	-0.27	0.36	0.443697	0.00612	1	0	-0.03	1	0	0.04	1	0
FBgn0038731	CG11659	-3.37	0.18	0.744727	-4.55	0.05	1.30103	-4.07	0.04	1.39794	1.55	0.21	0.677781	1.23	0.36	0.443697	1.05	1	0	-0.17	1	0	0.36	0.96	0.0177288	-0.00813	1	0	0.05	1	0	0.44	0.57	0.244125	-0.06	1	0	0.18	1	0	0.56	0.74	0.130768	0.79	0.35	0.455932
FBgn0029539	CG11663	0.5	1	0	0.47	1	0	0.94	0.66	0.180456	#N/A	#N/A	#N/A	#N/A	#N/A	#N/A	#N/A	#N/A	#N/A	-0.07	1	0	2.18	0.96	0.0177288	0.08	1	0	0.43	0.43	0.366532	0.25	0.86	0.0655015	0.48	0.32	0.49485	0.17	0.97	0.0132283	0.3	0.97	0.0132283	0.31	0.95	0.0222764
FBgn0040341	CG11664	#N/A	#N/A	#N/A	#N/A	#N/A	#N/A	#N/A	#N/A	#N/A	#N/A	#N/A	#N/A	#N/A	#N/A	#N/A	#N/A	#N/A	#N/A	#N/A	#N/A	#N/A	#N/A	#N/A	#N/A	#N/A	#N/A	#N/A	-0.1	1	0	-0.29	0.9	0.0457575	-0.25	0.9	0.0457575	-0.03	1	0	-0.19	1	0	-0.15	1	0
FBgn0033028	CG11665	-0.00402	1	0	-0.00745	1	0	0.02	1	0	-0.06	1	0	-0.2	0.82	0.0861861	0.05	1	0	-0.03	1	0	0.16	0.96	0.0177288	0.02	1	0	0.03	1	0	0.02	1	0	0.07	0.99	0.00436481	0.2	0.74	0.130768	0.03	1	0	-0.06	1	0
FBgn0040648	CG11666	0.84	1	0	0.86	1	0	1.37	0.3	0.522879	#N/A	#N/A	#N/A	#N/A	#N/A	#N/A	#N/A	#N/A	#N/A	#N/A	#N/A	#N/A	#N/A	#N/A	#N/A	#N/A	#N/A	#N/A	0.02	1	0	0.23	0.92	0.0362122	0.09	1	0	0.36	0.92	0.0362122	0.37	0.98	0.00877392	0.22	1	0
FBgn0038113	CG11668	-0.66	0.73	0.136677	-1.03	0.41	0.387216	-0.83	0.32	0.49485	-0.06	1	0	0.36	0.99	0.00436481	-0.31	1	0	-0.6	1	0	-0.86	0.96	0.0177288	-0.66	1	0	-0.51	0.75	0.124939	-0.63	0.67	0.173925	-0.65	0.57	0.244125	-0.49	0.9	0.0457575	0.3	1	0	0.16	1	0
FBgn0038114	CG11670	0.49	1	0	0.54	1	0	0.63	0.7	0.154902	-0.19	1	0	-0.22	1	0	-1.47	1	0	1.32	1	0	0.78	0.96	0.0177288	1.12	1	0	1.73	0.64	0.19382	1.59	0.75	0.124939	1.69	0.64	0.19382	1.52	0.67	0.173925	1.16	0.93	0.0315171	1.01	1	0
FBgn0037562	CG11671	-1.84	0.22	0.657577	-2.26	0.08	1.09691	-2.58	0.00997	2.0013	0.61	1	0	0.0035	1	0	-0.4	1	0	0.63	1	0	-0.32	0.97	0.0132283	-0.54	1	0	1.06	0.12	0.920819	0.23	0.99	0.00436481	-1.13	0.22	0.657577	0.01	1	0	0.56	0.97	0.0132283	0.54	0.99	0.00436481
FBgn0037563	CG11672	-0.8	0.5	0.30103	-0.6	1	0	-0.8	0.33	0.481486	0.38	1	0	0.51	0.39	0.408935	0.05	1	0	-0.04	1	0	-0.35	0.96	0.0177288	-0.38	1	0	-0.05	1	0	-0.31	0.56	0.251812	0.01	1	0	-0.55	0.17	0.769551	-0.5	0.3	0.522879	-0.35	0.66	0.180456
FBgn0030551	CG11674	-1.03	1	0	-4.03	1	0	-1.04	1	0	-0.18	1	0	-0.37	0.49	0.309804	0.17	1	0	-0.02	1	0	0.19	0.96	0.0177288	0.1	1	0	-2.25	0.69	0.161151	-1.42	0.87	0.0604807	-0.1	1	0	7.67	0.000173	3.76195	5.58	0.02	1.69897	1.62	1	0
FBgn0030678	CG11679	-0.08	1	0	-0.05	1	0	-0.2	1	0	-0.02	1	0	-0.03	1	0	0.08	1	0	0.05	1	0	0.12	0.99	0.00436481	0.01	1	0	-0.16	0.88	0.0555173	-0.18	0.88	0.0555173	-0.22	0.75	0.124939	0.05	1	0	0.04	1	0	0.03	1	0
FBgn0040551	CG11686	-0.38	1	0	-0.09	1	0	-0.48	0.71	0.148742	0.13	1	0	0.52	0.66	0.180456	0.28	1	0	0.03	1	0	-0.000124	1	0	0.21	1	0	0.14	0.99	0.00436481	-0.14	1	0	-0.09	1	0	0.1	1	0	0.24	1	0	0.36	0.95	0.0222764
FBgn0037570	CG11693	-2.41	1	0	0.85	1	0	1.96	0.89	0.05061	2.41	1	0	2.39	0.9	0.0457575	0.05	1	0	-0.04	1	0	-0.14	1	0	-2.24	1	0	0.67	1	0	-0.18	1	0	-2.41	0.94	0.0268721	-0.43	0.99	0.00436481	0.3	1	0	0.83	0.9	0.0457575
FBgn0037571	CG11694	1.03	0.38	0.420216	0.86	1	0	0.89	0.37	0.431798	2.41	1	0	4.15	0.74	0.130768	2.31	1	0	2.28	1	0	-0.04	1	0	0.08	1	0	0.08	1	0	0.05	1	0	0.17	0.94	0.0268721	0.36	0.88	0.0555173	0.56	0.59	0.229148	0.45	0.77	0.113509
FBgn0030316	CG11695	0.12	1	0	0.21	1	0	-0.08	1	0	-0.13	1	0	-0.2	0.9	0.0457575	0.16	1	0	0.06	1	0	0.14	0.96	0.0177288	0.00687	1	0	-0.11	1	0	-0.22	0.92	0.0362122	-0.25	0.85	0.0705811	0.07	1	0	-0.07	1	0	-0.07	1	0
FBgn0030314	CG11696	-0.11	1	0	0.03	1	0	-0.05	1	0	-0.21	1	0	-0.41	0.49	0.309804	0.00105	1	0	0.000307	1	0	0.14	0.96	0.0177288	0.12	1	0	-0.17	0.93	0.0315171	-0.19	0.92	0.0362122	-0.00986	1	0	0.33	0.85	0.0705811	0.00124	1	0	-0.18	1	0
FBgn0030313	CG11697	0.68	0.88	0.0555173	0.39	1	0	0.8	0.5	0.30103	0.03	1	0	2.39	0.9	0.0457575	2.31	1	0	0.82	1	0	1.22	0.96	0.0177288	0.16	1	0	0.22	0.76	0.119186	0.26	0.7	0.154902	0.42	0.22	0.657577	0.25	0.83	0.0809219	0.38	0.52	0.283997	0.35	0.56	0.251812
FBgn0037572	CG11698	1.03	0.51	0.29243	0.87	1	0	1.15	0.25	0.60206	0.03	1	0	2.39	0.9	0.0457575	2.31	1	0	-0.07	1	0	2.18	0.96	0.0177288	0.08	1	0	0.36	0.68	0.167491	0.19	0.96	0.0177288	0.35	0.69	0.161151	0.32	0.95	0.0222764	0.17	1	0	0.57	0.69	0.161151
FBgn0030311	CG11699	-0.04	1	0	0.04	1	0	-0.17	1	0	-0.19	1	0	-0.06	1	0	-0.17	1	0	0.02	1	0	0.05	1	0	0.01	1	0	0.09	1	0	0.12	0.98	0.00877392	0.03	1	0	0.02	1	0	0.14	1	0	0.02	1	0
FBgn0029856	CG11700	0.22	1	0	0.37	1	0	0.38	0.99	0.00436481	-0.37	1	0	-0.19	0.98	0.00877392	-0.35	1	0	0.15	1	0	0.56	0.37	0.431798	0.38	1	0	0.23	0.79	0.102373	0.31	0.68	0.167491	0.26	0.73	0.136677	0.28	0.83	0.0809219	0.04	1	0	0.05	1	0
FBgn0038690	CG11703	0.98	0.42	0.376751	0.62	1	0	0.96	0.29	0.537602	-0.85	1	0	-0.86	0.99	0.00436481	-3.2	1	0	2.28	1	0	-0.04	1	0	2.48	1	0	0.35	0.57	0.244125	0.28	0.78	0.107905	0.41	0.4	0.39794	0.27	0.82	0.0861861	0.34	0.68	0.167491	0.35	0.61	0.21467
FBgn0031115	CG11710	-0.22	1	0	-0.15	1	0	-0.21	1	0	-0.06	1	0	-0.22	0.82	0.0861861	-0.03	1	0	-0.08	1	0	0.25	0.96	0.0177288	0.04	1	0	0.01	1	0	-0.08	1	0	0.00914	1	0	0.14	0.96	0.0177288	0.14	1	0	0.02	1	0
FBgn0036170	CG11714	0.95	0.32	0.49485	0.78	0.97	0.0132283	1.05	0.12	0.920819	0.7	1	0	0.36	1	0	1.03	1	0	-0.49	1	0	-1.32	0.96	0.0177288	0.18	1	0	0.29	0.3	0.522879	0.38	0.11	0.958607	0.34	0.17	0.769551	0.26	0.45	0.346787	0.28	0.41	0.387216	0.43	0.03	1.52288
FBgn0264712	CG1172	0.08	1	0	-0.2	1	0	0.24	1	0	-0.09	1	0	-0.19	0.84	0.0757207	0.16	1	0	-0.00651	1	0	0.15	0.96	0.0177288	0.02	1	0	0.03	1	0	0.08	0.99	0.00436481	0.12	0.93	0.0315171	0.17	0.95	0.0222764	0.11	1	0	0.06	1	0
FBgn0037777	CG11722	0.33	1	0	0.59	1	0	0.71	0.5	0.30103	-0.1	1	0	-0.07	1	0	-0.12	1	0	-0.1	1	0	0.22	0.96	0.0177288	0.17	1	0	-0.03	1	0	0.08	1	0	0.1	0.99	0.00436481	0.3	0.74	0.130768	0.2	0.99	0.00436481	0.41	0.4	0.39794
FBgn0031391	CG11723	0.07	1	0	0.18	1	0	0.08	1	0	-0.05	1	0	-0.19	0.9	0.0457575	0.14	1	0	0.02	1	0	0.32	0.86	0.0655015	0.06	1	0	-0.13	0.96	0.0177288	-0.08	1	0	0.01	1	0	0.17	0.96	0.0177288	-0.1	1	0	-0.13	1	0
FBgn0036156	CG11726	1.44	0.09	1.04576	1.39	0.14	0.853872	1.78	0.00474	2.32422	3.26	1	0	2.39	0.9	0.0457575	0.05	1	0	#N/A	#N/A	#N/A	#N/A	#N/A	#N/A	#N/A	#N/A	#N/A	0.52	0.1	1	0.38	0.44	0.356547	0.43	0.26	0.585027	0.31	0.77	0.113509	0.46	0.38	0.420216	0.56	0.14	0.853872
FBgn0037592	CG11737	0.1	1	0	-0.02	1	0	-0.000513	1	0	-0.13	1	0	-0.27	0.73	0.136677	0.03	1	0	0.03	1	0	0.11	0.96	0.0177288	0.08	1	0	0.05	1	0	-0.01	1	0	0.08	0.99	0.00436481	0.02	1	0	-0.16	1	0	-0.08	1	0
FBgn0037239	CG11739	-0.25	1	0	-0.24	1	0	-0.21	1	0	0.07	1	0	0.06	1	0	-0.13	1	0	0.01	1	0	-0.07	0.99	0.00436481	0.04	1	0	-0.04	1	0	-0.13	0.91	0.0409586	-0.00854	1	0	-0.09	0.96	0.0177288	-0.07	1	0	0.05	1	0
FBgn0040531	CG11741	-0.11	1	0	-0.55	1	0	0.2	1	0	0.95	0.69	0.161151	0.08	1	0	0.59	1	0	-0.18	1	0	0.5	0.97	0.0132283	-0.32	1	0	-0.66	0.58	0.236572	-0.24	0.98	0.00877392	0.39	0.85	0.0705811	-0.06	1	0	1.11	0.23	0.638272	-0.22	1	0
FBgn0030292	CG11752	-0.38	1	0	-0.34	1	0	-0.73	0.59	0.229148	0.14	1	0	0.41	0.58	0.236572	-0.06	1	0	-0.05	1	0	-0.11	1	0	-0.08	1	0	0.02	1	0	-0.19	0.92	0.0362122	-0.17	0.93	0.0315171	-0.00358	1	0	0.32	0.78	0.107905	0.22	1	0
FBgn0037603	CG11753	-0.38	1	0	-0.22	1	0	-0.46	0.95	0.0222764	-0.23	1	0	-0.11	1	0	0.00611	1	0	-0.11	1	0	0.21	0.96	0.0177288	0.06	1	0	0.04	1	0	-0.07	1	0	0.16	0.94	0.0268721	-0.02	1	0	0.05	1	0	0.04	1	0
FBgn0037611	CG11755	0.64	1	0	0.65	1	0	0.39	1	0	-0.09	1	0	-0.31	0.79	0.102373	-0.06	1	0	0.05	1	0	0.43	0.86	0.0655015	0.11	1	0	0.03	1	0	0.00803	1	0	-0.1	1	0	0.48	0.92	0.0362122	0.33	1	0	0.23	1	0
FBgn0030290	CG11756	0.8	0.85	0.0705811	0.73	1	0	1.09	0.32	0.49485	2.09	1	0	2.05	0.75	0.124939	1.66	1	0	1.13	1	0	-0.68	1	0	-0.36	1	0	0.31	0.59	0.229148	0.29	0.71	0.148742	0.55	0.1	1	0.26	0.92	0.0362122	0.31	0.92	0.0362122	0.38	0.73	0.136677
FBgn0037615	CG11760	-0.21	1	0	-0.47	1	0	-0.28	1	0	-0.41	1	0	0.12	1	0	-0.24	1	0	0.31	1	0	-0.41	0.96	0.0177288	-0.55	1	0	0.03	1	0	0.25	0.76	0.119186	-0.41	0.3	0.522879	0.02	1	0	0.18	1	0	0.07	1	0
FBgn0037618	CG11762	0.2	1	0	0.64	1	0	0.15	1	0	2.09	1	0	-0.00771	1	0	0.74	1	0	2.28	1	0	-0.04	1	0	0.08	1	0	-0.3	1	0	0.23	1	0	0.25	1	0	0.05	1	0	-0.12	1	0	-0.11	1	0
FBgn0037625	CG11768	-1.18	0.85	0.0705811	-0.11	1	0	-0.17	1	0	-0.3	1	0	0.33	0.9	0.0457575	-0.6	1	0	0.41	1	0	-0.3	1	0	-0.4	1	0	0.38	0.69	0.161151	-0.24	0.93	0.0315171	0.07	1	0	0.32	0.94	0.0268721	-0.21	1	0	-0.02	1	0
FBgn0039252	CG11771	-0.17	1	0	-0.03	1	0	-0.23	1	0	-0.11	1	0	-0.1	0.97	0.0132283	-0.00526	1	0	0.02	1	0	0.17	0.96	0.0177288	0.12	1	0	-0.09	0.96	0.0177288	-0.07	0.99	0.00436481	-0.17	0.73	0.136677	0.02	1	0	0.02	1	0	-0.01	1	0
FBgn0033527	CG11777	-0.14	1	0	-0.00086	1	0	-0.08	1	0	-0.19	1	0	-0.25	0.85	0.0705811	0.11	1	0	0.01	1	0	0.19	0.96	0.0177288	0.16	1	0	0.37	0.77	0.113509	0.62	0.41	0.387216	0.49	0.56	0.251812	0.65	0.69	0.161151	0.24	1	0	0.13	1	0
FBgn0038683	CG11779	0.18	1	0	0.05	1	0	0.08	1	0	0.06	1	0	0.06	1	0	0.17	1	0	-0.12	1	0	-0.06	1	0	-0.09	1	0	0.21	0.74	0.130768	0.02	1	0	-0.00023	1	0	0.05	1	0	0.22	0.98	0.00877392	0.24	0.95	0.0222764
FBgn0039259	CG11781	0.21	1	0	-0.01	1	0	0.21	1	0	-0.06	1	0	-0.17	0.9	0.0457575	0.1	1	0	-0.12	1	0	0.13	0.98	0.00877392	-0.03	1	0	-0.03	1	0	0.09	1	0	0.17	0.94	0.0268721	0.2	0.96	0.0177288	0.08	1	0	0.1	1	0
FBgn0039264	CG11786	-1.39	0.99	0.00436481	-2.2	1	0	-0.62	1	0	0.53	1	0	0.5	1	0	-0.97	1	0	0.5	1	0	-0.15	1	0	1.86	1	0	-0.71	1	0	0.75	0.98	0.00877392	0.29	1	0	0.000254	1	0	-1.59	0.82	0.0861861	-0.78	1	0
FBgn0034495	CG11788	0.09	1	0	0.14	1	0	0.05	1	0	-0.17	1	0	-0.34	0.76	0.119186	0.17	1	0	0.09	1	0	0.16	0.98	0.00877392	0.08	1	0	-0.13	1	0	0.11	1	0	-0.23	1	0	0.93	0.54	0.267606	0.44	1	0	0.61	0.92	0.0362122
FBgn0039265	CG11790	-0.13	1	0	-0.19	1	0	-0.19	1	0	-0.04	1	0	-0.19	0.83	0.0809219	0.1	1	0	0.05	1	0	0.12	0.96	0.0177288	0.03	1	0	-0.11	0.96	0.0177288	-0.06	1	0	-0.08	1	0	-0.12	0.99	0.00436481	-0.25	0.94	0.0268721	-0.07	1	0
FBgn0039266	CG11791	-0.14	1	0	-0.21	1	0	-0.16	1	0	0.18	1	0	0.26	0.72	0.142668	-0.16	1	0	0.1	1	0	-0.22	0.96	0.0177288	-0.03	1	0	-0.16	0.76	0.119186	-0.02	1	0	-0.11	0.93	0.0315171	-0.17	0.83	0.0809219	-0.22	0.66	0.180456	0.03	1	0
FBgn0036992	CG11796	-2.91	0.1	1	-1.66	1	0	-3.9	0.00301	2.52143	-0.09	1	0	0.03	1	0	-0.02	1	0	-0.18	1	0	-0.28	0.96	0.0177288	-0.25	1	0	-0.36	0.61	0.21467	-0.8	0.03	1.52288	-0.22	0.88	0.0555173	-0.16	0.96	0.0177288	-0.37	0.62	0.207608	-0.61	0.08	1.09691
FBgn0030346	CG11802	0.22	1	0	0.02	1	0	0.18	1	0	-0.43	1	0	-0.42	0.56	0.251812	0.0096	1	0	-0.03	1	0	0.17	0.96	0.0177288	0.06	1	0	-0.07	1	0	-0.12	0.97	0.0132283	0.01	1	0	0.22	0.91	0.0409586	0.06	1	0	0.09	1	0
FBgn0033996	CG11807	0.09	1	0	0.17	1	0	0.02	1	0	0.05	1	0	-0.19	0.84	0.0757207	0.26	1	0	0.05	1	0	0.12	0.96	0.0177288	-0.01	1	0	0.01	1	0	-0.00281	1	0	-0.00704	1	0	0.03	1	0	0.03	1	0	-0.02	1	0
FBgn0034000	CG11808	0.07	1	0	0.07	1	0	0.2	1	0	-0.04	1	0	-0.3	0.82	0.0861861	0.00638	1	0	0.1	1	0	0.22	0.96	0.0177288	-0.00366	1	0	-0.17	0.98	0.00877392	-0.11	1	0	-0.14	1	0	0.34	0.92	0.0362122	0.46	0.88	0.0555173	0.14	1	0
FBgn0036099	CG11811	-0.29	1	0	-0.08	1	0	-0.13	1	0	-0.09	1	0	-0.24	0.79	0.102373	0.13	1	0	0.08	1	0	0.31	0.47	0.327902	0.13	1	0	0.1	0.96	0.0177288	0.2	0.8	0.09691	0.13	0.92	0.0362122	0.48	0.44	0.356547	0.04	1	0	-0.12	1	0
FBgn0035299	CG11815	0.95	0.46	0.337242	0.64	1	0	1.05	0.22	0.657577	-2.38	1	0	-0.00771	1	0	-2.35	1	0	-2.39	1	0	-0.14	1	0	-2.24	1	0	0.43	0.47	0.327902	0.17	0.96	0.0177288	0.29	0.76	0.119186	0.19	0.96	0.0177288	0.07	1	0	0.31	0.96	0.0177288
FBgn0030495	CG11816	1.9	0.48	0.318759	0.95	1	0	0.96	0.99	0.00436481	0.03	1	0	0.13	1	0	3.15	1	0	3.14	1	0	-0.04	1	0	0.08	1	0	1.6	0.42	0.376751	1.27	0.69	0.161151	1.78	0.3	0.522879	-0.34	1	0	-0.02	1	0	-0.28	1	0
FBgn0033519	CG11825	0.55	1	0	-0.33	1	0	-1.39	0.79	0.102373	0.03	1	0	-0.54	0.44	0.356547	0.38	1	0	0.24	1	0	0.53	0.67	0.173925	0.5	1	0	-0.34	0.89	0.05061	-0.77	0.46	0.337242	-0.33	0.89	0.05061	-0.5	0.89	0.05061	-1.08	0.26	0.585027	-0.65	0.74	0.130768
FBgn0039616	CG11828	1.1	1	0	-0.2	1	0	0.57	1	0	0.00198	1	0	-0.22	1	0	-0.78	1	0	-0.88	1	0	0.76	0.99	0.00436481	1.09	1	0	-0.25	0.7	0.154902	-0.19	0.87	0.0604807	-0.07	1	0	-0.25	0.83	0.0809219	-0.29	0.77	0.113509	-0.14	1	0
FBgn0031264	CG11835	-0.49	0.73	0.136677	-0.43	1	0	-0.35	0.89	0.05061	-0.15	1	0	0.65	0.58	0.236572	-0.65	1	0	0.45	1	0	-0.15	1	0	0.21	1	0	-0.07	1	0	0.48	0.37	0.431798	-0.17	0.94	0.0268721	0.02	1	0	0.25	0.99	0.00436481	0.15	1	0
FBgn0039272	CG11836	-0.04	1	0	0.16	1	0	0.14	1	0	-0.34	1	0	-0.44	0.56	0.251812	-0.01	1	0	0.07	1	0	0.27	0.96	0.0177288	0.12	1	0	0.25	0.9	0.0457575	0.22	0.96	0.0177288	0.09	1	0	0.33	0.96	0.0177288	-0.05	1	0	-0.23	1	0
FBgn0039627	CG11837	-0.38	1	0	-0.11	1	0	-0.32	1	0	-0.07	1	0	-0.14	0.9	0.0457575	0.08	1	0	0.05	1	0	0.23	0.96	0.0177288	0.07	1	0	-0.02	1	0	-0.12	1	0	0.02	1	0	0.64	0.74	0.130768	-0.03	1	0	-0.06	1	0
FBgn0039271	CG11839	-0.28	1	0	0.00464	1	0	-0.36	1	0	0.03	1	0	-0.12	0.99	0.00436481	0.18	1	0	-0.04	1	0	0.17	0.96	0.0177288	-0.00944	1	0	-0.65	0.32	0.49485	-0.08	1	0	0.08	1	0	0.4	0.92	0.0362122	-0.07	1	0	0.11	1	0
FBgn0039628	CG11841	0.65	1	0	0.93	1	0	0.74	1	0	-0.03	1	0	0.51	0.44	0.356547	-0.35	1	0	-0.07	1	0	-0.31	0.96	0.0177288	-0.1	1	0	-0.04	1	0	-0.06	1	0	0.01	1	0	-0.08	1	0	-0.11	1	0	-0.02	1	0
FBgn0039629	CG11842	-0.04	1	0	-0.3	1	0	-0.92	1	0	-0.35	1	0	0.19	0.93	0.0315171	-0.67	0.9	0.0457575	0.16	1	0	0.25	0.96	0.0177288	0.00517	1	0	-0.38	0.58	0.236572	-0.24	0.87	0.0604807	-0.61	0.15	0.823909	0.21	0.93	0.0315171	0.04	1	0	0.07	1	0
FBgn0039630	CG11843	0.66	1	0	-0.45	1	0	-1.3	0.75	0.124939	-0.35	1	0	-0.1	1	0	-0.56	1	0	-0.02	1	0	-0.34	1	0	-0.21	1	0	-0.78	0.59	0.229148	-0.79	0.64	0.19382	-0.53	0.82	0.0861861	-0.52	0.92	0.0362122	-0.00404	1	0	-0.18	1	0
FBgn0039293	CG11851	-0.2	1	0	-0.22	1	0	-0.25	1	0	-0.14	1	0	-0.33	0.57	0.244125	0.09	1	0	-0.03	1	0	0.23	0.96	0.0177288	0.06	1	0	-0.08	1	0	-0.02	1	0	0.13	0.95	0.0222764	0.38	0.82	0.0861861	-0.21	1	0	-0.32	0.97	0.0132283
FBgn0039297	CG11852	-0.29	1	0	0.02	1	0	-0.57	0.75	0.124939	0.23	1	0	0.66	0.53	0.275724	-0.29	1	0	-0.08	1	0	-0.64	0.94	0.0268721	-0.25	1	0	0.04	1	0	-0.11	1	0	0.000162	1	0	-0.01	1	0	0.07	1	0	0.02	1	0
FBgn0039299	CG11854	0.09	1	0	0.93	1	0	-0.56	0.93	0.0315171	0.62	1	0	1.39	0.58	0.236572	0.11	1	0	2.14	1	0	1	0.96	0.0177288	1.34	1	0	-0.24	0.95	0.0222764	-1.22	0.03	1.52288	-0.67	0.4	0.39794	-0.57	0.79	0.102373	-1.85	0.000652	3.18575	-2.2	2.34e-05	4.63078
FBgn0039303	CG11857	-0.04	1	0	-0.06	1	0	-0.1	1	0	0.01	1	0	-0.02	1	0	0.06	1	0	-0.05	1	0	0.16	0.96	0.0177288	-0.02	1	0	0.05	1	0	0.03	1	0	0.04	1	0	0.1	0.96	0.0177288	0.01	1	0	-0.09	1	0
FBgn0039305	CG11858	-0.1	1	0	-0.09	1	0	-0.16	1	0	-0.06	1	0	-0.02	1	0	-0.1	1	0	-0.000713	1	0	0.19	0.96	0.0177288	0.09	1	0	-0.33	0.45	0.346787	-0.06	1	0	-0.22	0.75	0.124939	0.12	1	0	0.1	1	0	-0.00259	1	0
FBgn0028947	CG11865	0.79	1	0	0.19	1	0	1.72	0.31	0.508638	0.03	1	0	0.13	1	0	2.31	1	0	#N/A	#N/A	#N/A	#N/A	#N/A	#N/A	#N/A	#N/A	#N/A	3.06	0.88	0.0555173	-0.09	1	0	-0.03	1	0	-0.03	1	0	2.45	1	0	2.32	1	0
FBgn0039633	CG11873	-0.19	1	0	-0.05	1	0	0.05	1	0	0.07	1	0	0.19	0.84	0.0757207	0.25	1	0	0.00304	1	0	-0.22	0.96	0.0177288	-0.17	1	0	-0.01	1	0	-0.03	1	0	-0.19	0.66	0.180456	-0.05	1	0	0.05	1	0	-0.18	1	0
FBgn0039635	CG11876	-0.04	1	0	-0.06	1	0	-0.33	0.91	0.0409586	-0.1	1	0	0.27	0.7	0.154902	-0.28	1	0	-0.14	1	0	-0.28	0.68	0.167491	-0.13	1	0	-0.06	1	0	-0.06	1	0	-0.17	0.86	0.0655015	-0.17	0.93	0.0315171	0.2	0.94	0.0268721	0.15	1	0
FBgn0039310	CG11878	-1.74	0.38	0.420216	-0.78	1	0	-1.45	0.4	0.39794	-0.1	1	0	0.43	0.63	0.200659	-0.9	0.08	1.09691	0.23	1	0	-0.53	0.81	0.091515	-0.06	1	0	0.12	0.88	0.0555173	-0.00422	1	0	-0.09	0.94	0.0268721	-0.13	0.92	0.0362122	0.44	0.03	1.52288	0.55	0.00188	2.72584
FBgn0039637	CG11880	0.32	1	0	0.06	1	0	0.44	0.9	0.0457575	-0.15	1	0	-0.06	1	0	-0.16	1	0	-0.02	1	0	-0.1	0.98	0.00877392	-0.06	1	0	-0.19	0.69	0.161151	-0.06	1	0	-0.28	0.33	0.481486	0.00649	1	0	0.11	1	0	0.07	1	0
FBgn0039642	CG11882	-0.05	1	0	-0.27	1	0	0.03	1	0	-0.23	1	0	-0.37	0.63	0.200659	0.04	1	0	0.05	1	0	0.1	1	0	0.09	1	0	-0.14	0.96	0.0177288	-0.17	0.96	0.0177288	-0.04	1	0	0.03	1	0	-0.22	1	0	-0.15	1	0
FBgn0033538	CG11883	-0.47	1	0	-0.48	1	0	-0.12	1	0	-0.09	1	0	0.01	1	0	0.02	1	0	0.00231	1	0	-0.05	1	0	-0.01	1	0	-0.15	0.82	0.0861861	-0.00594	1	0	-0.22	0.61	0.21467	-0.07	1	0	-0.03	1	0	0.09	1	0
FBgn0031253	CG11885	0.25	1	0	0.09	1	0	0.08	1	0	-0.00161	1	0	-0.21	0.9	0.0457575	0.06	1	0	-0.03	1	0	-0.01	1	0	0.05	1	0	0.19	0.88	0.0555173	0.04	1	0	0.18	0.88	0.0555173	0.12	1	0	0.17	1	0	0.28	0.95	0.0222764
FBgn0039308	CG11889	-0.68	0.99	0.00436481	0.03	1	0	-0.7	0.75	0.124939	-0.06	1	0	1.09	0.38	0.420216	0.39	1	0	0.08	1	0	-1.06	0.34	0.468521	-0.00893	1	0	0.18	0.94	0.0268721	-0.49	0.4	0.39794	0.02	1	0	-0.39	0.76	0.119186	-0.26	1	0	0.02	1	0
FBgn0039309	CG11891	-1.17	0.43	0.366532	-0.91	1	0	-2.41	0.000582	3.23508	0.2	1	0	0.33	0.79	0.102373	-0.77	0.37	0.431798	0.05	1	0	-0.34	0.96	0.0177288	-0.08	1	0	-0.07	1	0	0.21	0.67	0.173925	-0.02	1	0	-0.22	0.93	0.0315171	0.13	1	0	0.23	1	0
FBgn0039313	CG11892	0.45	0.99	0.00436481	0.38	1	0	0.16	1	0	0.28	1	0	0.48	0.29	0.537602	-0.53	0.4	0.39794	-0.18	1	0	-0.95	0.02	1.69897	-0.48	1	0	-0.1	0.99	0.00436481	-0.17	0.89	0.05061	0.07	1	0	-0.35	0.74	0.130768	-0.6	0.21	0.677781	-0.77	0.03	1.52288
FBgn0039316	CG11893	-1.58	0.89	0.05061	0.72	1	0	0.85	1	0	-0.85	1	0	0.89	0.93	0.0315171	-0.95	1	0	4.06	1	0	2.18	0.96	0.0177288	2.48	1	0	-1.15	0.83	0.0809219	0.78	0.92	0.0362122	-1.06	0.86	0.0655015	-0.18	1	0	1.09	0.72	0.142668	-0.68	1	0
FBgn0039644	CG11897	-0.16	1	0	-0.08	1	0	0.00858	1	0	-0.07	1	0	-0.19	0.9	0.0457575	0.05	1	0	-0.03	1	0	0.02	1	0	-0.02	1	0	-0.13	0.86	0.0655015	-0.05	1	0	0.06	1	0	0.37	0.57	0.244125	0.08	1	0	-0.36	0.6	0.221849
FBgn0039645	CG11898	-0.32	1	0	-0.62	1	0	-0.77	0.88	0.0555173	0.64	0.88	0.0555173	0.53	0.58	0.236572	0.3	1	0	0.1	1	0	-0.26	0.97	0.0132283	-0.14	1	0	0.38	0.66	0.180456	0.42	0.64	0.19382	0.25	0.87	0.0604807	0.23	0.96	0.0177288	0.25	1	0	0.19	1	0
FBgn0014427	CG11899	0.23	1	0	0.2	1	0	0.32	1	0	0.04	1	0	-0.04	1	0	0.05	1	0	-0.1	1	0	0.02	1	0	-0.07	1	0	-0.33	0.58	0.236572	-0.53	0.19	0.721246	-0.26	0.75	0.124939	-0.09	1	0	0.15	1	0	0.06	1	0
FBgn0028647	CG11902	-0.1	1	0	0.00629	1	0	0.02	1	0	-0.11	1	0	-0.23	0.79	0.102373	0.09	1	0	0.01	1	0	0.06	1	0	-0.05	1	0	0.02	1	0	0.02	1	0	0.03	1	0	0.14	0.96	0.0177288	0.00193	1	0	0.01	1	0
FBgn0036678	CG11905	0.09	1	0	-0.14	1	0	0.23	1	0	-3.33	0.8	0.09691	-4.18	0.32	0.49485	-0.73	1	0	0.18	1	0	-2.6	0.54	0.267606	-0.73	1	0	0.08	1	0	0.19	0.87	0.0604807	0.23	0.74	0.130768	0.23	0.9	0.0457575	0.3	0.81	0.091515	0.33	0.7	0.154902
FBgn0034425	CG11906	-0.31	1	0	-0.14	1	0	-0.3	1	0	-0.21	1	0	-0.44	0.48	0.318759	0.04	1	0	-0.05	1	0	0.17	0.96	0.0177288	0.05	1	0	-0.08	1	0	-0.1	1	0	-0.08	1	0	0.26	0.93	0.0315171	-0.06	1	0	0.08	1	0
FBgn0031249	CG11911	-2.84	6.59e-05	4.18111	-2.41	0.00255	2.59346	-3.75	4.51e-09	8.34582	0.11	1	0	0.17	0.9	0.0457575	-0.13	1	0	-0.02	1	0	-0.55	0.64	0.19382	-0.24	1	0	-0.09	1	0	-0.43	0.48	0.318759	-0.58	0.14	0.853872	-0.18	0.89	0.05061	-0.82	3.07e-05	4.51286	-1	8.27e-08	7.08249
FBgn0031248	CG11912	-0.06	1	0	-0.04	1	0	0.04	1	0	0.9	0.08	1.09691	0.44	0.63	0.200659	-0.11	1	0	0.32	1	0	-0.28	0.96	0.0177288	-0.37	1	0	0.17	0.96	0.0177288	-0.41	0.6	0.221849	-0.97	0.00504	2.29757	0.51	0.76	0.119186	-0.06	1	0	-0.21	1	0
FBgn0039331	CG11913	0.79	0.59	0.229148	0.61	1	0	0.82	0.4	0.39794	-2.38	1	0	0.83	0.99	0.00436481	-2.35	1	0	-2.39	1	0	-0.14	1	0	-2.24	1	0	0.44	0.14	0.853872	0.28	0.6	0.221849	0.47	0.09	1.04576	0.25	0.84	0.0757207	0.27	0.85	0.0705811	0.36	0.53	0.275724
FBgn0039274	CG11920	-0.33	1	0	-0.05	1	0	-0.1	1	0	0.1	1	0	0.00861	1	0	0.1	1	0	-0.02	1	0	0.16	0.96	0.0177288	0.08	1	0	0.00181	1	0	0.1	1	0	0.02	1	0	0.61	0.67	0.173925	0.18	1	0	-0.09	1	0
FBgn0031638	CG11927	0.25	1	0	0.29	1	0	0.36	1	0	-0.1	1	0	-0.19	0.9	0.0457575	0.03	1	0	0.02	1	0	0.14	0.96	0.0177288	0.13	1	0	0.3	0.57	0.244125	0.32	0.59	0.229148	0.38	0.33	0.481486	0.09	1	0	0.05	1	0	0.12	1	0
FBgn0031620	CG11929	0.66	0.91	0.0409586	0.52	1	0	0.76	0.56	0.251812	-2.33	1	0	-2.34	0.67	0.173925	-4.68	1	0	-1.42	1	0	0.74	0.98	0.00877392	-1.22	1	0	0.25	0.45	0.346787	0.32	0.27	0.568636	0.38	0.1	1	0.23	0.6	0.221849	0.2	0.77	0.113509	0.41	0.06	1.22185
FBgn0039656	CG11951	0.04	1	0	-0.26	1	0	0.01	1	0	-0.12	1	0	0.37	0.75	0.124939	-0.79	0.44	0.356547	0.11	1	0	-0.42	0.96	0.0177288	0.03	1	0	-0.08	1	0	0.05	1	0	-0.00702	1	0	-0.02	1	0	-0.28	0.95	0.0222764	0.3	0.91	0.0409586
FBgn0034436	CG11961	-0.99	0.18	0.744727	-0.93	0.32	0.49485	-1.15	0.03	1.52288	0.44	0.88	0.0555173	0.46	0.39	0.408935	0.19	1	0	-0.1	1	0	-0.59	0.31	0.508638	-0.17	1	0	0.46	0.02	1.69897	0.02	1	0	0.17	0.77	0.113509	0.01	1	0	-0.14	1	0	-0.07	1	0
FBgn0037644	CG11964	-0.13	1	0	0.05	1	0	0.02	1	0	0.00147	1	0	-0.03	1	0	-0.01	1	0	0.04	1	0	0.11	0.96	0.0177288	0.07	1	0	0.06	1	0	0.05	1	0	0.05	1	0	0.17	0.96	0.0177288	-0.06	1	0	-0.07	1	0
FBgn0037645	CG11966	0.17	1	0	-0.66	1	0	1.25	0.48	0.318759	-1.22	1	0	-0.98	0.78	0.107905	-0.51	1	0	-0.31	1	0	-1.99	0.6	0.221849	-1.66	1	0	-0.18	1	0	-0.19	1	0	-0.95	0.99	0.00436481	-0.56	1	0	-0.36	1	0	0.42	1	0
FBgn0027503	CG11970	-0.07	1	0	-0.09	1	0	0.00178	1	0	-0.03	1	0	-0.1	0.99	0.00436481	0.19	1	0	-0.02	1	0	-0.03	1	0	0.000945	1	0	0.08	1	0	-0.04	1	0	0.03	1	0	0.15	0.96	0.0177288	0.01	1	0	-0.03	1	0
FBgn0037648	CG11975	0.1	1	0	0.06	1	0	-0.02	1	0	-0.1	1	0	-0.16	0.9	0.0457575	-0.04	1	0	-0.00892	1	0	0.15	0.96	0.0177288	0.01	1	0	-0.04	1	0	0.00603	1	0	-0.06	1	0	0.04	1	0	-0.1	1	0	-0.15	1	0
FBgn0037650	CG11977	-2.41	1	0	-2.25	1	0	-2.45	1	0	0.86	1	0	-2.27	0.9	0.0457575	-2.35	1	0	2.28	1	0	-0.04	1	0	0.08	1	0	-0.01	1	0	0.07	1	0	0.28	0.77	0.113509	-0.29	0.93	0.0315171	-0.45	0.82	0.0861861	-0.14	1	0
FBgn0037652	CG11980	-0.06	1	0	-0.08	1	0	-0.06	1	0	0.08	1	0	-0.12	0.93	0.0315171	0.16	1	0	-0.00782	1	0	0.15	0.96	0.0177288	0.12	1	0	-0.12	0.96	0.0177288	-0.13	0.97	0.0132283	-0.3	0.58	0.236572	0.32	0.8	0.09691	0.03	1	0	-0.04	1	0
FBgn0037653	CG11982	0.24	1	0	0.18	1	0	0.22	1	0	-0.13	1	0	-0.17	0.9	0.0457575	0.07	1	0	-0.06	1	0	0.08	0.98	0.00877392	0.11	1	0	0.06	1	0	0.05	1	0	0.12	0.88	0.0555173	0.07	1	0	0.2	0.93	0.0315171	0.19	0.95	0.0222764
FBgn0037654	CG11983	0.64	1	0	0.67	1	0	1.08	0.32	0.49485	0.73	1	0	0.09	1	0	0.75	1	0	-0.47	1	0	0.12	1	0	-0.22	1	0	0.3	0.64	0.19382	0.32	0.64	0.19382	0.4	0.36	0.443697	0.38	0.58	0.236572	0.48	0.32	0.49485	0.41	0.48	0.318759
FBgn0037655	CG11984	0.00845	1	0	0.05	1	0	-0.01	1	0	-0.21	1	0	-0.17	0.89	0.05061	-0.05	1	0	-0.04	1	0	0.1	0.99	0.00436481	0.02	1	0	-0.04	1	0	-0.00773	1	0	-0.11	0.9	0.0457575	-0.01	1	0	0.05	1	0	0.04	1	0
FBgn0040534	CG11985	0.34	1	0	0.45	1	0	0.28	1	0	-0.00159	1	0	-0.1	1	0	0.1	1	0	0.02	1	0	0.3	0.96	0.0177288	0.2	1	0	0.5	0.28	0.552842	0.59	0.16	0.79588	0.17	0.94	0.0268721	0.3	0.92	0.0362122	0.24	1	0	0.21	1	0
FBgn0037656	CG11986	0.39	1	0	0.32	1	0	0.32	1	0	-0.08	1	0	-0.24	0.85	0.0705811	0.14	1	0	-0.18	1	0	0.2	0.96	0.0177288	0.05	1	0	-0.14	0.98	0.00877392	-0.11	1	0	0.00354	1	0	0.27	0.93	0.0315171	0.12	1	0	0.12	1	0
FBgn0037662	CG11997	-2.41	1	0	-2.25	1	0	-2.45	1	0	-0.25	1	0	0.18	1	0	-2.43	1	0	-1.72	1	0	-4.9	0.89	0.05061	-1.52	1	0	-0.54	0.99	0.00436481	-1.02	0.91	0.0409586	-1.61	0.7	0.154902	-0.94	0.81	0.091515	-1.04	0.83	0.0809219	-1.58	0.43	0.366532
FBgn0037312	CG11999	0.05	1	0	-0.1	1	0	-0.09	1	0	-0.28	1	0	-0.32	0.71	0.148742	0.09	1	0	-0.01	1	0	0.3	0.94	0.0268721	0.17	1	0	-0.01	1	0	-0.16	0.94	0.0268721	0.13	0.94	0.0268721	-0.08	1	0	-0.19	1	0	-0.27	0.87	0.0604807
FBgn0035234	CG12003	0.64	1	0	-0.48	1	0	-0.12	1	0	0.03	1	0	3.76	0.8	0.09691	2.31	1	0	#N/A	#N/A	#N/A	#N/A	#N/A	#N/A	#N/A	#N/A	#N/A	-0.17	1	0	-2.47	0.96	0.0177288	-2.41	0.94	0.0268721	#N/A	#N/A	#N/A	#N/A	#N/A	#N/A	#N/A	#N/A	#N/A
FBgn0035236	CG12004	-0.06	1	0	-0.00954	1	0	-0.03	1	0	-0.09	1	0	-0.08	1	0	0.05	1	0	-0.02	1	0	0.19	0.96	0.0177288	0.04	1	0	0.02	1	0	-0.04	1	0	-0.05	1	0	0.1	0.96	0.0177288	0.07	1	0	0.12	1	0
FBgn0035464	CG12006	-0.07	1	0	-0.07	1	0	-0.04	1	0	-0.11	1	0	-0.15	0.9	0.0457575	0.08	1	0	0.02	1	0	0.18	0.96	0.0177288	0.07	1	0	0.16	0.91	0.0409586	0.13	0.96	0.0177288	0.19	0.82	0.0861861	0.28	0.84	0.0757207	-0.05	1	0	-0.12	1	0
FBgn0037293	CG12007	0.05	1	0	0.15	1	0	-0.00359	1	0	-0.11	1	0	-0.16	0.9	0.0457575	0.000738	1	0	0.04	1	0	0.13	0.96	0.0177288	0.11	1	0	0.02	1	0	0.15	0.96	0.0177288	0.19	0.87	0.0604807	-0.12	0.99	0.00436481	-0.22	0.98	0.00877392	-0.1	1	0
FBgn0035430	CG12009	0.05	1	0	-0.12	1	0	0.35	1	0	-3.89	0.26	0.585027	-1.65	0.7	0.154902	-1.16	1	0	-1.61	1	0	-3.68	0.27	0.568636	-2.74	1	0	0.44	0.82	0.0861861	-0.24	0.98	0.00877392	0.43	0.83	0.0809219	0.23	1	0	0.38	1	0	0.48	1	0
FBgn0035443	CG12010	0.08	1	0	0.13	1	0	-0.06	1	0	-0.13	1	0	0.02	1	0	0.03	1	0	-0.09	1	0	0.57	0.27	0.568636	0.1	1	0	-0.12	1	0	0.26	0.9	0.0457575	0.04	1	0	0.26	0.97	0.0132283	0.12	1	0	0.00603	1	0
FBgn0035257	CG12011	1.97	1	0	1.76	1	0	2.21	0.79	0.102373	0.11	1	0	0.45	0.94	0.0268721	0.06	1	0	0.59	1	0	-2.17	0.7	0.154902	-0.7	1	0	-1.03	0.98	0.00877392	-0.19	1	0	-0.95	0.99	0.00436481	-2.09	0.81	0.091515	0.18	1	0	0.04	1	0
FBgn0035444	CG12012	-0.1	1	0	0.03	1	0	-0.11	1	0	-0.09	1	0	0.00189	1	0	-0.07	1	0	-0.08	1	0	0.06	1	0	-0.02	1	0	-0.19	0.87	0.0604807	-0.16	0.94	0.0268721	-0.12	0.96	0.0177288	-0.15	0.96	0.0177288	-0.17	1	0	-0.06	1	0
FBgn0035445	CG12014	0.26	1	0	0.55	1	0	0.48	1	0	1	1	0	0.25	1	0	-0.14	1	0	0.04	1	0	-0.58	0.96	0.0177288	0.1	1	0	-0.35	0.94	0.0268721	-0.68	0.7	0.154902	-0.98	0.34	0.468521	-0.06	1	0	-0.09	1	0	-0.21	1	0
FBgn0035436	CG12016	0.18	1	0	-0.05	1	0	0.46	0.92	0.0362122	0.11	1	0	0.15	0.9	0.0457575	-0.05	1	0	-0.21	1	0	-0.08	1	0	-0.1	1	0	0.00913	1	0	0.09	0.97	0.0132283	0.16	0.79	0.102373	-0.64	0.1	1	-0.02	1	0	-0.27	0.94	0.0268721
FBgn0035429	CG12017	-0.72	1	0	-0.16	1	0	-0.46	1	0	-1.9	1	0	0.33	1	0	-2.05	1	0	-0.42	1	0	-0.54	1	0	0.17	1	0	-0.27	1	0	0.87	0.67	0.173925	0.53	0.88	0.0555173	0.4	0.97	0.0132283	2.92	6.16e-06	5.21042	0.68	0.95	0.0222764
FBgn0027903	CG12018	-0.02	1	0	-0.07	1	0	-0.22	1	0	-0.4	1	0	-0.71	0.15	0.823909	0.00365	1	0	-0.04	1	0	0.07	1	0	0.05	1	0	0.11	1	0	0.46	0.6	0.221849	0.09	1	0	0.67	0.63	0.200659	0.29	1	0	0.01	1	0
FBgn0035273	CG12020	0.76	0.74	0.130768	0.52	1	0	0.96	0.33	0.481486	1.78	1	0	0.83	1	0	-0.1	1	0	-0.04	1	0	0.69	1	0	0.16	1	0	0.29	0.62	0.207608	0.26	0.76	0.119186	0.35	0.43	0.366532	0.21	0.87	0.0604807	0.43	0.26	0.585027	0.45	0.18	0.744727
FBgn0035283	CG12024	0.08	1	0	0.28	1	0	0.11	1	0	-0.08	1	0	-0.05	1	0	0.13	1	0	-0.2	1	0	-0.15	0.96	0.0177288	-0.11	1	0	-0.02	1	0	-0.19	0.85	0.0705811	-0.1	0.97	0.0132283	-0.33	0.72	0.142668	-0.37	0.63	0.200659	-0.47	0.33	0.481486
FBgn0035285	CG12025	-0.09	1	0	-0.21	1	0	-0.02	1	0	-0.03	1	0	0.02	1	0	-0.1	1	0	-0.09	1	0	-0.13	0.96	0.0177288	-0.13	1	0	-0.13	0.88	0.0555173	-0.08	0.99	0.00436481	-0.05	1	0	-0.1	0.96	0.0177288	-0.21	0.71	0.148742	-0.13	1	0
FBgn0035585	CG12027	1.05	0.38	0.420216	0.79	1	0	1.14	0.18	0.744727	-2.92	1	0	-5.19	0.59	0.229148	-1.66	1	0	-0.07	1	0	-0.04	1	0	2.48	1	0	0.45	0.36	0.443697	0.38	0.59	0.229148	0.44	0.36	0.443697	0.27	0.84	0.0757207	0.35	0.68	0.167491	0.44	0.38	0.420216
FBgn0035421	CG12034	-0.08	1	0	-0.02	1	0	-0.00079	1	0	-0.08	1	0	-0.3	0.67	0.173925	0.05	1	0	0.1	1	0	0.2	0.96	0.0177288	0.13	1	0	0.17	0.78	0.107905	0.28	0.5	0.30103	0.24	0.55	0.259637	0.22	0.91	0.0409586	0.25	0.92	0.0362122	0.21	1	0
FBgn0035263	CG12035	0.81	0.71	0.148742	0.63	1	0	0.7	0.7	0.154902	#N/A	#N/A	#N/A	#N/A	#N/A	#N/A	#N/A	#N/A	#N/A	-0.04	1	0	-2.36	0.96	0.0177288	-2.24	1	0	0.67	0.0083	2.08092	0.49	0.15	0.823909	0.69	0.00609	2.21538	0.26	0.87	0.0604807	0.5	0.3	0.522879	0.48	0.3	0.522879
FBgn0035179	CG12038	0.02	1	0	0.06	1	0	0.32	1	0	-0.32	1	0	0.41	0.85	0.0705811	-0.79	1	0	0.37	1	0	-0.14	1	0	-0.05	1	0	0.24	0.85	0.0705811	0.12	1	0	-0.16	0.95	0.0222764	-0.02	1	0	-0.11	1	0	-0.19	1	0
FBgn0033206	CG12042	0.15	1	0	0.02	1	0	-0.05	1	0	-0.32	1	0	-0.3	0.69	0.161151	-0.02	1	0	0.08	1	0	0.15	0.96	0.0177288	0.08	1	0	-0.03	1	0	-0.24	0.78	0.107905	-0.11	0.96	0.0177288	0.19	0.94	0.0268721	0.06	1	0	-0.00699	1	0
FBgn0032915	CG12050	-0.18	1	0	-0.07	1	0	-0.11	1	0	0.05	1	0	-0.05	1	0	0.06	1	0	0.1	1	0	0.16	0.96	0.0177288	0.07	1	0	-0.08	0.99	0.00436481	-0.00275	1	0	0.08	0.98	0.00877392	0.41	0.55	0.259637	0.13	1	0	0.26	0.95	0.0222764
FBgn0039831	CG12054	-0.13	1	0	0.00682	1	0	-0.18	1	0	0.00688	1	0	-0.01	1	0	0.05	1	0	-0.06	1	0	0.07	1	0	0.02	1	0	0.00643	1	0	0.02	1	0	-0.07	0.98	0.00877392	0.04	1	0	-0.11	1	0	-0.19	0.76	0.119186
FBgn0030099	CG12056	-0.000115	1	0	0.02	1	0	-0.15	1	0	0.00646	1	0	0.12	1	0	0.04	1	0	0.13	1	0	-0.01	1	0	-0.01	1	0	0.11	1	0	-0.1	1	0	-0.1	1	0	0.04	1	0	0.1	1	0	-0.03	1	0
FBgn0030098	CG12057	-0.3	1	0	-0.15	1	0	-0.66	0.54	0.267606	0.28	1	0	0.28	0.78	0.107905	-0.22	1	0	0.15	1	0	-0.4	0.88	0.0555173	-0.07	1	0	0.35	0.61	0.21467	-0.34	0.67	0.173925	-0.14	0.96	0.0177288	0.36	0.18	0.744727	-0.35	0.25	0.60206	-0.94	4.99e-09	8.3019
FBgn0040031	CG12061	0.39	1	0	0.36	1	0	0.92	0.54	0.267606	-2.33	1	0	0.81	0.9	0.0457575	0.09	1	0	1.74	1	0	1.22	0.96	0.0177288	1.02	1	0	0.17	0.95	0.0222764	0.06	1	0	0.26	0.81	0.091515	0.33	0.87	0.0604807	0.37	0.86	0.0655015	0.47	0.61	0.21467
FBgn0030052	CG12065	-0.17	1	0	-0.12	1	0	-0.32	0.93	0.0315171	-0.00512	1	0	0.04	1	0	-0.26	1	0	0.15	1	0	0.04	1	0	0.03	1	0	-0.18	0.73	0.136677	-0.18	0.79	0.102373	-0.26	0.43	0.366532	0.01	1	0	-0.21	0.75	0.124939	-0.00277	1	0
FBgn0039796	CG12069	1.01	0.41	0.387216	0.68	1	0	1.06	0.22	0.657577	0.14	1	0	0.42	0.93	0.0315171	-0.04	1	0	-1.56	1	0	-0.05	1	0	0.05	1	0	0.05	1	0	0.08	1	0	0.25	0.74	0.130768	0.25	0.9	0.0457575	0.32	0.8	0.09691	0.4	0.54	0.267606
FBgn0039808	CG12071	-0.53	1	0	-0.71	1	0	-0.16	1	0	0.7	1	0	0.81	0.66	0.180456	-0.47	1	0	0.25	1	0	-0.13	1	0	0.33	1	0	-0.33	0.79	0.102373	-0.19	0.97	0.0132283	-0.85	0.1	1	-0.04	1	0	-0.26	1	0	-0.2	1	0
FBgn0030065	CG12075	-0.08	1	0	-0.1	1	0	-0.31	0.93	0.0315171	-0.24	1	0	-0.02	1	0	0.23	1	0	0.07	1	0	0.07	1	0	0.05	1	0	-0.21	0.75	0.124939	-0.16	0.91	0.0409586	-0.18	0.85	0.0705811	0.06	1	0	-0.04	1	0	-0.12	1	0
FBgn0035426	CG12078	0.74	1	0	0.55	1	0	0.92	0.57	0.244125	0.03	1	0	2.39	0.9	0.0457575	2.31	1	0	#N/A	#N/A	#N/A	#N/A	#N/A	#N/A	#N/A	#N/A	#N/A	0.38	0.52	0.283997	0.4	0.55	0.259637	0.32	0.66	0.180456	0.17	0.97	0.0132283	0.41	0.79	0.102373	0.42	0.73	0.136677
FBgn0037386	CG1208	-1.87	0.25	0.60206	-3.41	0.000595	3.22548	-0.82	0.9	0.0457575	0.03	1	0	0.84	0.25	0.60206	-0.65	1	0	0.52	1	0	0.12	1	0	0.17	1	0	0.6	0.07	1.1549	0.42	0.41	0.387216	0.19	0.88	0.0555173	0.15	0.93	0.0315171	0.62	0.0037	2.4318	0.78	4.55e-05	4.34199
FBgn0030053	CG12081	-0.06	1	0	-0.05	1	0	-0.04	1	0	-0.24	1	0	-0.11	0.98	0.00877392	0.04	1	0	0.03	1	0	0.06	1	0	0.09	1	0	-0.02	1	0	-0.08	1	0	0.14	0.94	0.0268721	-0.00891	1	0	-0.00324	1	0	-0.00308	1	0
FBgn0035402	CG12082	0.11	1	0	0.06	1	0	-0.05	1	0	-0.17	1	0	-0.29	0.67	0.173925	0.07	1	0	-0.00943	1	0	0.16	0.96	0.0177288	0.1	1	0	-0.00591	1	0	-0.18	0.79	0.102373	-0.01	1	0	0.17	0.94	0.0268721	0.04	1	0	-0.03	1	0
FBgn0043458	CG12084	0.02	1	0	-0.06	1	0	0.05	1	0	-0.16	1	0	-0.18	0.86	0.0655015	-0.06	1	0	0.00271	1	0	0.16	0.96	0.0177288	-0.03	1	0	-0.06	1	0	0.0043	1	0	-0.03	1	0	0.01	1	0	-0.03	1	0	-0.03	1	0
FBgn0035227	CG12090	-0.16	1	0	-0.13	1	0	-0.14	1	0	-0.1	1	0	-0.27	0.68	0.167491	-0.14	1	0	-0.03	1	0	-0.43	0.29	0.537602	-0.13	1	0	-0.2	0.63	0.200659	-0.79	5.59e-07	6.25259	-0.07	0.99	0.00436481	-0.34	0.16	0.79588	-0.99	2.3e-11	10.6383	-0.28	0.39	0.408935
FBgn0035228	CG12091	-0.16	1	0	-0.14	1	0	-0.09	1	0	-0.15	1	0	-0.00869	1	0	-0.18	1	0	-0.09	1	0	-0.17	0.96	0.0177288	-0.07	1	0	-0.09	0.96	0.0177288	-0.03	1	0	-0.03	1	0	-0.1	1	0	-0.04	1	0	0.02	1	0
FBgn0035372	CG12093	0.13	1	0	0.15	1	0	-0.09	1	0	-0.19	1	0	-0.22	0.84	0.0757207	0.00945	1	0	0.03	1	0	0.11	0.99	0.00436481	0.17	1	0	-0.15	0.87	0.0604807	-0.12	0.96	0.0177288	-0.19	0.75	0.124939	0.08	1	0	0.02	1	0	-0.08	1	0
FBgn0030457	CG12096	0.06	1	0	0.02	1	0	-0.00895	1	0	-0.15	1	0	-0.21	0.86	0.0655015	0.04	1	0	0.02	1	0	0.1	1	0	-0.02	1	0	0.1	0.98	0.00877392	0.11	0.97	0.0132283	0.26	0.61	0.21467	0.09	1	0	-0.01	1	0	-0.00893	1	0
FBgn0035232	CG12099	0.02	1	0	0.11	1	0	-0.06	1	0	0.05	1	0	0.2	0.8	0.09691	0.04	1	0	-0.000498	1	0	-0.15	0.96	0.0177288	-0.06	1	0	0.11	0.92	0.0362122	0.12	0.91	0.0409586	0.05	1	0	-0.11	1	0	-0.06	1	0	-0.11	1	0
FBgn0035238	CG12104	0.11	1	0	0.07	1	0	0.14	1	0	-0.06	1	0	-0.24	0.82	0.0861861	0.19	1	0	0.03	1	0	0.2	0.96	0.0177288	0.09	1	0	0.28	0.61	0.21467	0.46	0.2	0.69897	0.23	0.74	0.130768	0.32	0.74	0.130768	0.43	0.46	0.337242	0.21	1	0
FBgn0035241	CG12105	-0.17	1	0	-0.09	1	0	-0.09	1	0	-0.05	1	0	0.58	0.37	0.431798	-0.31	1	0	-0.41	1	0	-0.92	0.23	0.638272	-0.66	1	0	-0.17	0.79	0.102373	0.18	0.78	0.107905	-0.45	0.05	1.30103	0.08	1	0	0.72	0.00959	2.01818	0.76	0.00551	2.25885
FBgn0030100	CG12106	0.11	1	0	-0.12	1	0	-0.08	1	0	-0.14	1	0	-0.18	0.93	0.0315171	0.25	1	0	0.09	1	0	0.22	0.96	0.0177288	0.23	1	0	0.00868	1	0	-0.18	1	0	-0.05	1	0	0.37	0.96	0.0177288	-0.11	1	0	-0.18	1	0
FBgn0033209	CG12107	0.09	1	0	-0.00604	1	0	-0.18	1	0	0.17	1	0	-0.1	0.96	0.0177288	0.18	1	0	0.07	1	0	0.21	0.96	0.0177288	0.16	1	0	0.28	0.59	0.229148	0.21	0.83	0.0809219	0.13	0.94	0.0268721	0.46	0.34	0.468521	0.07	1	0	-0.08	1	0
FBgn0030050	CG12111	1.07	1	0	0.96	1	0	0.79	1	0	1.39	1	0	-2.27	0.9	0.0457575	-0.1	1	0	-0.07	1	0	3.01	0.96	0.0177288	2.48	1	0	-0.11	1	0	0.11	0.99	0.00436481	0.12	0.97	0.0132283	-0.03	1	0	0.33	0.73	0.136677	0.32	0.72	0.142668
FBgn0030048	CG12112	-0.26	1	0	-0.26	1	0	-0.27	1	0	-0.31	1	0	-0.59	0.19	0.721246	-0.02	1	0	-0.02	1	0	0.18	0.96	0.0177288	0.00778	1	0	0.03	1	0	0.24	0.77	0.113509	0.17	0.88	0.0555173	0.43	0.82	0.0861861	0.17	1	0	0.3	1	0
FBgn0030097	CG12115	0.26	1	0	-0.03	1	0	-0.19	1	0	-1.77	1	0	0.27	1	0	-1.88	1	0	0.5	1	0	0.15	1	0	-1.54	1	0	-2.51	0.63	0.200659	-0.2	1	0	-1.05	0.91	0.0409586	-0.38	1	0	-1.86	0.74	0.130768	-2	0.63	0.200659
FBgn0030041	CG12116	-0.33	1	0	-0.08	1	0	0.02	1	0	0.15	1	0	0.69	0.06	1.22185	-0.00721	1	0	0.04	1	0	-0.63	0.32	0.49485	0.04	1	0	-0.18	0.72	0.142668	-0.29	0.35	0.455932	-0.02	1	0	-0.34	0.74	0.130768	-0.11	1	0	0.14	1	0
FBgn0030101	CG12118	0.26	1	0	0.13	1	0	0.16	1	0	0.05	1	0	0.16	0.9	0.0457575	-0.11	1	0	0.03	1	0	0.01	1	0	-0.07	1	0	0.00492	1	0	0.16	0.82	0.0861861	0.06	1	0	0.2	0.88	0.0555173	0.3	0.6	0.221849	0.3	0.55	0.259637
FBgn0030102	CG12119	-0.36	1	0	-0.47	1	0	-0.29	1	0	-0.02	1	0	0.29	0.72	0.142668	-0.36	1	0	0.00536	1	0	-0.52	0.86	0.0655015	-0.15	1	0	-0.41	0.23	0.638272	-0.22	0.81	0.091515	-0.27	0.6	0.221849	-0.1	1	0	-0.12	1	0	0.01	1	0
FBgn0030109	CG12121	-0.2	1	0	-0.14	1	0	-0.1	1	0	-0.08	1	0	-0.1	0.97	0.0132283	0.02	1	0	0.04	1	0	0.1	0.96	0.0177288	0.05	1	0	-0.12	0.89	0.05061	-0.16	0.82	0.0861861	-0.11	0.92	0.0362122	0.03	1	0	-0.14	0.98	0.00877392	-0.09	1	0
FBgn0030039	CG12123	-0.02	1	0	-0.08	1	0	-0.08	1	0	-0.29	1	0	-0.3	0.77	0.113509	0.08	1	0	0.06	1	0	0.34	0.89	0.05061	0.1	1	0	0.29	0.64	0.19382	0.1	0.99	0.00436481	0.19	0.86	0.0655015	0.19	0.93	0.0315171	0.25	0.91	0.0409586	0.22	0.98	0.00877392
FBgn0030037	CG12125	0.18	1	0	-0.12	1	0	0.25	1	0	0.02	1	0	-0.12	0.93	0.0315171	0.15	1	0	0.00124	1	0	0.14	0.96	0.0177288	0.07	1	0	0.16	0.94	0.0268721	0.04	1	0	0.1	1	0	0.31	0.85	0.0705811	0.17	1	0	-0.03	1	0
FBgn0033280	CG12126	1.32	0.29	0.537602	0.63	1	0	1.12	0.28	0.552842	2.41	1	0	0.13	1	0	0.05	1	0	-0.07	1	0	2.18	0.96	0.0177288	0.08	1	0	0.23	0.76	0.119186	0.34	0.51	0.29243	0.24	0.72	0.142668	0.29	0.81	0.091515	0.27	0.91	0.0409586	0.36	0.63	0.200659
FBgn0033473	CG12128	-0.12	1	0	0.1	1	0	0.05	1	0	0.03	1	0	-0.04	1	0	0.05	1	0	0.08	1	0	0.15	0.96	0.0177288	0.06	1	0	-0.05	1	0	0.12	0.99	0.00436481	0.17	0.94	0.0268721	0.4	0.72	0.142668	0.13	1	0	0.16	1	0
FBgn0033475	CG12129	0.02	1	0	0.13	1	0	-0.00734	1	0	-0.17	1	0	-0.37	0.6	0.221849	0.07	1	0	-0.02	1	0	0.27	0.71	0.148742	0.1	1	0	0.05	1	0	0.15	0.9	0.0457575	-0.02	1	0	0.23	0.92	0.0362122	-0.1	1	0	-0.11	1	0
FBgn0037387	CG1213	0.01	1	0	-0.33	1	0	0.6	0.94	0.0268721	0.18	1	0	0.48	0.49	0.309804	-0.46	1	0	-0.000971	1	0	0.05	1	0	0.03	1	0	-0.05	1	0	-0.11	0.98	0.00877392	-0.00788	1	0	-0.36	0.71	0.148742	-0.01	1	0	-0.09	1	0
FBgn0033469	CG12133	-0.65	1	0	-0.52	1	0	0.56	1	0	2.41	1	0	2.39	0.9	0.0457575	0.05	1	0	#N/A	#N/A	#N/A	#N/A	#N/A	#N/A	#N/A	#N/A	#N/A	-4.24	0.7	0.154902	-1.11	0.93	0.0315171	-1.02	0.93	0.0315171	-0.03	1	0	0.57	1	0	-3.67	0.94	0.0268721
FBgn0033471	CG12134	-0.06	1	0	0.18	1	0	-0.15	1	0	0.03	1	0	-0.09	0.99	0.00436481	0.06	1	0	-0.04	1	0	0.14	0.96	0.0177288	0.05	1	0	-0.18	0.96	0.0177288	0.18	0.97	0.0132283	-0.34	0.77	0.113509	0.71	0.63	0.200659	0.12	1	0	-0.0019	1	0
FBgn0037325	CG12147	0.97	0.43	0.366532	0.73	1	0	1.19	0.13	0.886057	0.86	1	0	-0.00771	1	0	-0.1	1	0	-0.07	1	0	3.01	0.96	0.0177288	0.08	1	0	0.42	0.33	0.481486	0.3	0.7	0.154902	0.39	0.4	0.39794	0.31	0.77	0.113509	0.35	0.69	0.161151	0.44	0.41	0.387216
FBgn0029957	CG12155	0.00843	1	0	0.0031	1	0	-0.16	1	0	-0.12	1	0	-0.19	0.86	0.0655015	0.17	1	0	-0.06	1	0	0.2	0.96	0.0177288	0.07	1	0	0.13	0.96	0.0177288	0.03	1	0	0.06	1	0	0.2	0.93	0.0315171	-0.07	1	0	-0.05	1	0
FBgn0040775	CG12158	1.28	1	0	-2.25	1	0	1.27	1	0	0.63	0.94	0.0268721	0.92	0.15	0.823909	0.22	1	0	0.08	1	0	-0.02	1	0	0.02	1	0	-0.01	1	0	0.14	0.9	0.0457575	-0.18	0.77	0.113509	-0.13	0.98	0.00877392	0.01	1	0	-0.06	1	0
FBgn0033232	CG12159	0.22	1	0	0.21	1	0	0.23	1	0	-0.32	1	0	-0.38	0.63	0.200659	-0.14	1	0	0.14	1	0	0.1	1	0	-0.00528	1	0	0.29	0.59	0.229148	-0.04	1	0	0.1	0.98	0.00877392	0.12	0.97	0.0132283	0.09	1	0	0.03	1	0
FBgn0037329	CG12162	0.45	1	0	0.23	1	0	0.62	0.56	0.251812	-0.12	1	0	-0.000751	1	0	-0.08	1	0	0.08	1	0	0.01	1	0	-0.1	1	0	0.15	0.81	0.091515	0.1	0.96	0.0177288	0.21	0.57	0.244125	0.13	0.93	0.0315171	0.32	0.24	0.619789	0.26	0.46	0.337242
FBgn0260462	CG12163	0.11	1	0	0.12	1	0	0.07	1	0	0.00138	1	0	-0.06	1	0	-0.05	1	0	-0.02	1	0	-0.13	0.96	0.0177288	-0.12	1	0	0.05	1	0	-0.15	0.91	0.0409586	0.01	1	0	-0.06	1	0	0.00139	1	0	-0.06	1	0
FBgn0033158	CG12164	-1.52	0.88	0.0555173	0.1	1	0	0.22	1	0	-1.94	0.7	0.154902	-0.85	0.82	0.0861861	-3.73	0.06	1.22185	0.2	1	0	-1.87	0.12	0.920819	-0.26	1	0	-0.74	0.84	0.0757207	-0.58	0.94	0.0268721	-0.55	0.93	0.0315171	-0.29	0.99	0.00436481	-0.73	0.9	0.0457575	-0.8	0.8	0.09691
FBgn0037356	CG12170	-0.03	1	0	-0.07	1	0	-0.28	1	0	-0.08	1	0	-0.07	1	0	0.05	1	0	0.000779	1	0	0.19	0.96	0.0177288	0.07	1	0	-0.2	0.9	0.0457575	-0.12	1	0	-0.04	1	0	-0.16	0.96	0.0177288	-0.03	1	0	-0.18	1	0
FBgn0037354	CG12171	-0.26	1	0	-0.15	1	0	-0.48	0.85	0.0705811	-0.11	1	0	-0.16	0.89	0.05061	-0.02	1	0	-0.2	1	0	-0.05	1	0	-0.18	1	0	0.06	1	0	-0.3	0.41	0.387216	-0.17	0.78	0.107905	0.17	0.96	0.0177288	0.35	0.69	0.161151	0.04	1	0
FBgn0037305	CG12173	0.04	1	0	0.03	1	0	-0.14	1	0	0.06	1	0	0.01	1	0	0.12	1	0	0.05	1	0	0.21	0.96	0.0177288	0.07	1	0	-0.04	1	0	0.04	1	0	-0.08	1	0	0.03	1	0	-0.14	1	0	-0.03	1	0
FBgn0030510	CG12177	-0.29	1	0	0.07	1	0	-0.54	0.86	0.0655015	-0.59	0.57	0.244125	-0.41	0.6	0.221849	-0.01	1	0	-0.09	1	0	0.14	0.96	0.0177288	0.02	1	0	-0.07	1	0	-0.05	1	0	0.12	0.94	0.0268721	0.03	1	0	0.05	1	0	0.12	1	0
FBgn0025388	CG12179	0.25	1	0	0.16	1	0	0.3	1	0	-0.43	1	0	-0.57	0.36	0.443697	0.08	1	0	-0.07	1	0	0.01	1	0	0.08	1	0	0.35	0.32	0.49485	0.34	0.42	0.376751	0.44	0.14	0.853872	0.36	0.32	0.49485	0.22	0.85	0.0705811	0.33	0.43	0.366532
FBgn0037377	CG1218	-0.06	1	0	0.07	1	0	0.06	1	0	-0.15	1	0	-0.3	0.68	0.167491	0.12	1	0	0.00444	1	0	0.19	0.96	0.0177288	0.04	1	0	0.09	1	0	0.25	0.79	0.102373	-0.11	0.98	0.00877392	0.58	0.66	0.180456	0.14	1	0	0.05	1	0
FBgn0028504	CG12182	-0.25	1	0	-0.22	1	0	-0.15	1	0	0.06	1	0	0.11	1	0	0.2	1	0	0.08	1	0	0.03	1	0	0.13	1	0	-0.15	0.96	0.0177288	0.06	1	0	-0.11	0.99	0.00436481	0.08	1	0	-0.12	1	0	-0.0016	1	0
FBgn0025387	CG12184	0.58	1	0	0.54	1	0	0.51	0.94	0.0268721	-0.43	1	0	-0.81	0.7	0.154902	0.03	1	0	-0.77	1	0	-0.6	0.96	0.0177288	-0.42	1	0	0.3	0.64	0.19382	0.41	0.41	0.387216	0.3	0.61	0.21467	0.37	0.67	0.173925	0.38	0.67	0.173925	0.49	0.36	0.443697
FBgn0031636	CG12194	0.91	0.43	0.366532	0.93	0.77	0.113509	0.7	0.56	0.251812	0.18	1	0	0.5	0.46	0.337242	0.35	1	0	-0.07	1	0	-0.32	0.96	0.0177288	-0.11	1	0	0.26	0.61	0.21467	-0.03	1	0	0.08	1	0	-0.13	0.97	0.0132283	-0.17	1	0	-0.08	1	0
FBgn0031018	CG12200	1.28	1	0	0.00674	1	0	0.74	1	0	-0.21	1	0	-0.59	0.48	0.318759	0.27	1	0	0.02	1	0	0.29	0.96	0.0177288	0.16	1	0	-1.41	0.87	0.0604807	-0.2	1	0	-0.8	0.97	0.0132283	1.89	0.26	0.585027	0.75	1	0	-1.03	0.98	0.00877392
FBgn0031021	CG12203	-0.16	1	0	-0.1	1	0	-0.49	0.84	0.0757207	0.05	1	0	0.36	0.58	0.236572	-0.19	1	0	-0.04	1	0	-0.16	0.96	0.0177288	-0.09	1	0	-0.03	1	0	-0.22	0.81	0.091515	-0.21	0.78	0.107905	-0.05	1	0	0.3	0.33	0.481486	0.14	0.99	0.00436481
FBgn0031022	CG12204	-0.01	1	0	-0.09	1	0	-0.23	1	0	-0.15	1	0	-0.18	0.91	0.0409586	0.0027	1	0	0.19	1	0	0.23	0.96	0.0177288	0.09	1	0	-0.32	0.95	0.0222764	-0.18	1	0	-0.26	0.96	0.0177288	0.59	0.79	0.102373	0.02	1	0	-0.19	1	0
FBgn0029662	CG12206	-0.22	1	0	-0.36	1	0	-0.36	0.94	0.0268721	0.07	1	0	0.19	0.94	0.0268721	0.14	1	0	0.18	1	0	-0.17	1	0	0.13	1	0	0.58	0.12	0.920819	0.35	0.64	0.19382	0.39	0.46	0.337242	0.4	0.68	0.167491	0.29	0.95	0.0222764	0.44	0.58	0.236572
FBgn0038220	CG12207	0.09	1	0	0.17	1	0	0.13	1	0	-0.02	1	0	0.05	1	0	0.15	1	0	-0.06	1	0	-0.03	1	0	-0.11	1	0	0.08	0.96	0.0177288	0.09	0.97	0.0132283	0.16	0.79	0.102373	0.14	0.91	0.0409586	0.17	0.9	0.0457575	0.23	0.61	0.21467
FBgn0033498	CG12209	1.09	0.41	0.387216	0.83	1	0	1.21	0.18	0.744727	-0.52	1	0	-0.72	0.9	0.0457575	-2.15	1	0	0.5	1	0	1.71	0.96	0.0177288	1.65	1	0	0.09	1	0	0.13	0.97	0.0132283	0.21	0.79	0.102373	0.1	1	0	0.27	0.85	0.0705811	0.35	0.56	0.251812
FBgn0260742	CG12213	-0.1	1	0	-0.05	1	0	0.02	1	0	-0.07	1	0	-0.16	0.9	0.0457575	0.02	1	0	-0.03	1	0	0.12	0.96	0.0177288	-0.09	1	0	-0.02	1	0	0.00572	1	0	0.00659	1	0	0.08	1	0	-0.04	1	0	-0.04	1	0
FBgn0043796	CG12219	0.2	1	0	0.24	1	0	0.26	1	0	-0.23	1	0	-0.31	0.71	0.148742	0.24	1	0	-0.00441	1	0	0.2	0.96	0.0177288	0.00518	1	0	-0.07	1	0	-0.18	0.96	0.0177288	-0.03	1	0	0.15	0.97	0.0132283	0.1	1	0	-0.11	1	0
FBgn0037974	CG12224	0.23	1	0	-0.06	1	0	-0.21	1	0	0.51	1	0	0.46	0.8	0.09691	-0.31	1	0	0.64	1	0	0.85	0.39	0.408935	0.92	0.79	0.102373	0.49	0.17	0.769551	0.42	0.39	0.408935	0.13	0.95	0.0222764	0.42	0.54	0.267606	0.65	0.11	0.958607	0.56	0.21	0.677781
FBgn0036723	CG12229	1.1	0.28	0.552842	0.78	1	0	1.28	0.07	1.1549	-0.85	1	0	1.19	0.9	0.0457575	-0.11	1	0	-2.39	1	0	0.69	1	0	1.02	1	0	0.23	0.52	0.283997	0.29	0.36	0.443697	0.3	0.26	0.585027	0.16	0.88	0.0555173	0.17	0.87	0.0604807	0.37	0.1	1
FBgn0031026	CG12231	0.12	1	0	-0.11	1	0	0.31	1	0	0.03	1	0	2.39	0.9	0.0457575	0.05	1	0	#N/A	#N/A	#N/A	#N/A	#N/A	#N/A	#N/A	#N/A	#N/A	0.52	0.67	0.173925	0.38	0.87	0.0604807	0.34	0.88	0.0555173	0.12	1	0	0.09	1	0	0.26	1	0
FBgn0029822	CG12236	-0.12	1	0	-0.02	1	0	-0.00747	1	0	-0.19	1	0	-0.35	0.56	0.251812	0.17	1	0	-0.12	1	0	0.06	1	0	-0.03	1	0	0.09	1	0	0.09	1	0	-0.09	1	0	0.45	0.69	0.161151	-0.00424	1	0	-0.05	1	0
FBgn0031048	CG12237	0.11	1	0	-0.03	1	0	-0.09	1	0	-0.2	1	0	-0.22	0.82	0.0861861	0.06	1	0	0.02	1	0	0.22	0.88	0.0555173	0.12	1	0	-0.07	1	0	-0.05	1	0	-0.05	1	0	0.12	0.99	0.00436481	-0.02	1	0	-0.11	1	0
FBgn0029810	CG12239	-0.15	1	0	0.08	1	0	-0.13	1	0	0.26	1	0	0.41	0.59	0.229148	-0.3	1	0	0.25	1	0	-0.26	0.96	0.0177288	-0.02	1	0	0.07	0.99	0.00436481	0.06	1	0	0.03	1	0	-0.1	0.96	0.0177288	-0.27	0.46	0.337242	-0.18	0.82	0.0861861
FBgn0038304	CG12241	-0.02	1	0	-0.04	1	0	-0.11	1	0	-0.02	1	0	-0.17	0.88	0.0555173	0.13	1	0	-0.08	1	0	0.05	1	0	-0.07	1	0	0.17	0.79	0.102373	0.19	0.77	0.113509	0.25	0.49	0.309804	0.02	1	0	0.09	1	0	0.03	1	0
FBgn0026148	CG12253	-0.05	1	0	0.03	1	0	0.08	1	0	-0.23	1	0	-0.42	0.59	0.229148	0.18	1	0	0.1	1	0	0.43	0.71	0.148742	0.21	1	0	0.26	0.93	0.0315171	0.16	1	0	0.25	0.94	0.0268721	0.39	0.93	0.0315171	-0.05	1	0	-0.06	1	0
FBgn0038002	CG12256	-0.8	1	0	-2.07	1	0	-1.35	0.99	0.00436481	0.34	1	0	0.3	1	0	0.11	1	0	0.71	1	0	0.00565	1	0	0.98	1	0	0.04	1	0	-0.41	0.92	0.0362122	0.26	0.97	0.0132283	0.17	1	0	-0.46	0.96	0.0177288	-0.68	0.64	0.19382
FBgn0039557	CG12259	-0.14	1	0	-0.08	1	0	0.06	1	0	-0.03	1	0	-0.17	0.9	0.0457575	0.06	1	0	-0.04	1	0	0.1	1	0	0.11	1	0	-0.27	0.7	0.154902	0.05	1	0	-0.12	0.97	0.0132283	0.35	0.88	0.0555173	0.15	1	0	0.07	1	0
FBgn0035811	CG12262	0.1	1	0	0.42	1	0	-0.12	1	0	0.0012	1	0	-0.12	0.93	0.0315171	0.16	1	0	0.19	1	0	0.08	1	0	0.14	1	0	0.08	0.96	0.0177288	-0.27	0.43	0.366532	-0.03	1	0	0.07	1	0	-0.33	0.58	0.236572	-0.28	0.7	0.154902
FBgn0034346	CG12263	0.02	1	0	-0.1	1	0	-0.09	1	0	-0.1	1	0	-0.13	0.9	0.0457575	0.14	1	0	0.11	1	0	0.21	0.96	0.0177288	0.07	1	0	0.13	0.95	0.0222764	-0.00296	1	0	0.11	0.95	0.0222764	0.05	1	0	-0.09	1	0	0.01	1	0
FBgn0032393	CG12264	-0.09	1	0	-0.04	1	0	-0.26	1	0	-0.00381	1	0	0.04	1	0	0.05	1	0	-0.04	1	0	-0.08	0.98	0.00877392	-0.04	1	0	-0.00898	1	0	-0.02	1	0	0.16	0.81	0.091515	-0.12	0.96	0.0177288	-0.12	1	0	-0.19	1	0
FBgn0038057	CG12267	-0.07	1	0	0.000595	1	0	-0.32	1	0	0.12	1	0	0.07	1	0	-0.04	1	0	0.03	1	0	0.1	1	0	0.00559	1	0	-0.28	0.83	0.0809219	0.04	1	0	-0.32	0.77	0.113509	0.11	1	0	0.19	1	0	-0.24	1	0
FBgn0039131	CG12268	-0.01	1	0	-0.36	1	0	0.46	1	0	0.14	1	0	0.44	0.81	0.091515	-0.28	1	0	-0.05	1	0	-0.72	0.77	0.113509	-0.06	1	0	-0.2	0.65	0.187087	-0.08	0.98	0.00877392	-0.12	0.88	0.0555173	-0.27	0.77	0.113509	0.02	1	0	-0.08	1	0
FBgn0038665	CG12269	-0.12	1	0	-0.43	1	0	-0.88	0.99	0.00436481	-0.14	1	0	0.22	0.96	0.0177288	-0.49	1	0	0.29	1	0	-0.31	0.97	0.0132283	-0.25	1	0	0.25	0.84	0.0757207	-0.25	0.89	0.05061	-0.2	0.91	0.0409586	-0.23	0.96	0.0177288	-0.18	1	0	-0.23	1	0
FBgn0037491	CG1227	0.11	1	0	0.19	1	0	-0.06	1	0	-0.1	1	0	-0.23	0.83	0.0809219	0.15	1	0	-0.01	1	0	0.25	0.96	0.0177288	0.01	1	0	-0.35	0.41	0.387216	-0.32	0.55	0.259637	-0.34	0.4	0.39794	0.29	0.93	0.0315171	-0.22	1	0	-0.03	1	0
FBgn0036571	CG12272	0.12	1	0	0.1	1	0	0.00267	1	0	0.05	1	0	-0.05	1	0	0.1	1	0	0.11	1	0	0.14	0.96	0.0177288	0.07	1	0	-0.02	1	0	0.2	0.87	0.0604807	0.06	1	0	0.00509	1	0	-0.07	1	0	-0.03	1	0
FBgn0038847	CG12278	-2.41	1	0	-2.25	1	0	-2.45	1	0	0.03	1	0	2.39	0.9	0.0457575	0.05	1	0	2.28	1	0	-0.04	1	0	2.48	1	0	-1.95	0.8	0.09691	-1.11	0.96	0.0177288	-4.19	0.72	0.142668	-0.03	1	0	0.17	1	0	0.57	1	0
FBgn0038080	CG12279	0.11	1	0	-0.04	1	0	0.01	1	0	-0.00109	1	0	-0.08	1	0	-0.00591	1	0	-0.18	1	0	-0.02	1	0	-0.22	1	0	0.22	0.83	0.0809219	0.34	0.66	0.180456	0.4	0.41	0.387216	0.14	0.96	0.0177288	0.14	1	0	-0.04	1	0
FBgn0032620	CG12288	-0.2	1	0	-0.13	1	0	-0.04	1	0	-0.02	1	0	-0.2	0.83	0.0809219	0.17	1	0	-0.00282	1	0	0.21	0.96	0.0177288	0.1	1	0	-0.09	1	0	-0.00831	1	0	-0.28	0.94	0.0268721	2.17	0.02	1.69897	1.22	0.53	0.275724	0.1	1	0
FBgn0036160	CG12289	1.34	0.26	0.585027	0.39	1	0	1.54	0.06	1.22185	0.00574	1	0	-2.27	0.9	0.0457575	-2.35	1	0	-0.04	1	0	1.22	0.96	0.0177288	-2.24	1	0	0.25	0.7	0.154902	0.25	0.74	0.130768	0.41	0.25	0.60206	0.08	1	0	0.25	0.85	0.0705811	0.37	0.41	0.387216
FBgn0039419	CG12290	-0.1	1	0	0.04	1	0	-0.22	1	0	0.26	1	0	0.51	0.24	0.619789	0.12	1	0	0.24	1	0	-0.34	0.96	0.0177288	-0.03	1	0	0.02	1	0	0.02	1	0	-0.08	1	0	-0.11	0.96	0.0177288	-0.18	0.84	0.0757207	-0.13	1	0
FBgn0032295	CG12299	-0.14	1	0	-0.14	1	0	-0.05	1	0	-0.34	1	0	-0.35	0.56	0.251812	0.13	1	0	-0.000595	1	0	0.08	1	0	0.04	1	0	0.04	1	0	-0.01	1	0	0.03	1	0	0.52	0.55	0.259637	0.27	1	0	-0.00228	1	0
FBgn0036514	CG12301	-0.46	1	0	-0.25	1	0	-0.23	1	0	0.05	1	0	-0.1	0.99	0.00436481	0.00779	1	0	0.01	1	0	-0.00901	1	0	-0.12	1	0	-0.07	1	0	0.03	1	0	-0.00754	1	0	0.61	0.63	0.200659	0.02	1	0	0.09	1	0
FBgn0036515	CG12304	-0.04	1	0	-0.02	1	0	-0.16	1	0	0.09	1	0	-0.03	1	0	0.16	1	0	0.16	1	0	0.38	0.4	0.39794	0.26	1	0	0.00333	1	0	0.13	0.97	0.0132283	0.02	1	0	0.21	0.92	0.0362122	0.08	1	0	0.09	1	0
FBgn0032370	CG12307	1.19	0.28	0.552842	1.02	0.76	0.119186	1.4	0.06	1.22185	0.03	1	0	0.13	1	0	3.67	1	0	#N/A	#N/A	#N/A	#N/A	#N/A	#N/A	#N/A	#N/A	#N/A	0.22	0.61	0.21467	0.24	0.6	0.221849	0.46	0.03	1.52288	0.22	0.93	0.0315171	0.4	0.64	0.19382	0.44	0.49	0.309804
FBgn0033542	CG12309	0.89	0.37	0.431798	0.69	1	0	0.91	0.21	0.677781	0.95	1	0	-3.66	0.8	0.09691	-1.49	1	0	-2.39	1	0	0.69	1	0	-2.24	1	0	0.33	0.38	0.420216	0.28	0.61	0.21467	0.42	0.16	0.79588	0.21	0.7	0.154902	0.28	0.4	0.39794	0.39	0.07	1.1549
FBgn0035134	CG1231	-0.34	1	0	-1.02	1	0	-0.81	1	0	-0.34	1	0	-0.16	1	0	-1.05	1	0	0.69	1	0	1.02	0.96	0.0177288	0.39	1	0	0.59	0.77	0.113509	0.49	0.89	0.05061	0.56	0.81	0.091515	-0.1	1	0	-0.17	1	0	0.06	1	0
FBgn0036467	CG12310	0.31	1	0	0.68	1	0	-0.11	1	0	0.63	1	0	0.88	0.84	0.0757207	0.12	1	0	-1.15	1	0	-0.4	1	0	-1.28	1	0	0.35	0.76	0.119186	-0.05	1	0	0.15	0.98	0.00877392	-0.56	0.81	0.091515	-0.27	1	0	-0.57	0.83	0.0809219
FBgn0036483	CG12316	-0.35	1	0	-0.24	1	0	-0.35	1	0	-0.16	1	0	-0.34	0.57	0.244125	0.17	1	0	-0.21	1	0	-0.04	1	0	-0.12	1	0	0.21	0.87	0.0604807	-0.00135	1	0	0.05	1	0	0.44	0.54	0.267606	0.00689	1	0	-0.09	1	0
FBgn0038590	CG12320	0.06	1	0	-0.00708	1	0	0.03	1	0	-0.27	1	0	-0.12	1	0	-0.07	1	0	0.13	1	0	0.11	1	0	0.29	1	0	0.43	0.62	0.207608	0.1	1	0	0.37	0.73	0.136677	0.12	1	0	0.05	1	0	0.03	1	0
FBgn0038577	CG12321	0.23	1	0	0.08	1	0	0.06	1	0	-0.06	1	0	-0.13	0.91	0.0409586	0.09	1	0	0.00667	1	0	0.06	1	0	0.04	1	0	0.17	0.78	0.107905	0.08	0.99	0.00436481	0.3	0.35	0.455932	0.13	0.92	0.0362122	0.11	1	0	0.05	1	0
FBgn0033557	CG12325	-0.31	1	0	-0.16	1	0	-0.25	1	0	0.00812	1	0	-0.05	1	0	0.06	1	0	0.08	1	0	0.22	0.91	0.0409586	0.12	1	0	-0.22	0.85	0.0705811	0.05	1	0	-0.01	1	0	0.59	0.7	0.154902	0.12	1	0	-0.2	1	0
FBgn0035137	CG1233	-0.06	1	0	0.14	1	0	-0.08	1	0	0.00213	1	0	-0.00734	1	0	-0.00555	1	0	-0.04	1	0	-0.04	1	0	-0.02	1	0	-0.05	1	0	0.03	1	0	0.04	1	0	0.00817	1	0	-0.11	1	0	-0.19	1	0
FBgn0038617	CG12333	0.12	1	0	0.08	1	0	0.25	1	0	-0.17	1	0	-0.25	0.83	0.0809219	0.18	1	0	-0.06	1	0	0.01	1	0	-0.06	1	0	-0.03	1	0	-0.00964	1	0	0.04	1	0	0.04	1	0	0.06	1	0	0.04	1	0
FBgn0033543	CG12338	-0.19	1	0	-0.04	1	0	-0.34	0.99	0.00436481	0.14	1	0	0.12	0.99	0.00436481	-0.18	1	0	-0.33	1	0	-0.61	0.18	0.744727	-0.31	1	0	0.04	1	0	-0.22	0.68	0.167491	-0.15	0.84	0.0757207	-0.4	0.07	1.1549	-0.3	0.34	0.468521	-0.12	1	0
FBgn0037489	CG1234	-0.3	1	0	-0.15	1	0	-0.18	1	0	0.07	1	0	-0.02	1	0	0.03	1	0	-0.02	1	0	0.07	0.99	0.00436481	0.04	1	0	-0.21	0.72	0.142668	-0.02	1	0	-0.27	0.49	0.309804	0.47	0.35	0.455932	0.05	1	0	-0.00308	1	0
FBgn0033550	CG12341	-0.36	1	0	-0.18	1	0	-0.25	1	0	-0.24	1	0	-0.16	0.91	0.0409586	-0.04	1	0	-0.07	1	0	0.07	1	0	-0.03	1	0	-0.24	0.81	0.091515	0.02	1	0	-0.16	0.94	0.0268721	-0.1	1	0	-0.14	1	0	-0.11	1	0
FBgn0033556	CG12343	0.24	1	0	0.16	1	0	0.26	1	0	-0.13	1	0	-0.14	0.93	0.0315171	-0.05	1	0	0.03	1	0	0.11	0.97	0.0132283	0.07	1	0	0.1	0.98	0.00877392	0.18	0.88	0.0555173	-0.02	1	0	0.18	0.96	0.0177288	0.07	1	0	0.17	1	0
FBgn0033558	CG12344	0.34	1	0	-0.27	1	0	0.43	1	0	0.29	1	0	1.1	0.21	0.677781	0.44	1	0	0.31	1	0	-0.1	1	0	0.3	1	0	-0.05	1	0	0.07	1	0	0.04	1	0	-0.22	0.96	0.0177288	0.07	1	0	-0.00414	1	0
FBgn0038558	CG12347	0.55	1	0	0.26	1	0	1.51	0.23	0.638272	-2.38	1	0	-2.27	0.9	0.0457575	-2.35	1	0	#N/A	#N/A	#N/A	#N/A	#N/A	#N/A	#N/A	#N/A	#N/A	0.32	0.71	0.148742	0.35	0.72	0.142668	0.45	0.41	0.387216	0.15	1	0	0.18	1	0	0.4	0.85	0.0705811
FBgn0040805	CG12355	0.31	1	0	-0.05	1	0	0.36	1	0	0.31	1	0	0.44	0.61	0.21467	-0.4	1	0	-0.04	1	0	-0.47	0.96	0.0177288	-0.49	1	0	0.2	0.68	0.167491	0.13	0.92	0.0362122	0.08	0.98	0.00877392	0.04	1	0	0.08	1	0	0.09	1	0
FBgn0037370	CG1236	0.16	1	0	0.21	1	0	0.15	1	0	-0.03	1	0	-0.16	0.9	0.0457575	0.12	1	0	-0.03	1	0	0.1	0.99	0.00436481	-0.01	1	0	-0.29	0.72	0.142668	0.06	1	0	-0.2	0.88	0.0555173	0.04	1	0	-0.06	1	0	-0.1	1	0
FBgn0038111	CG12360	0.15	1	0	0.12	1	0	0.07	1	0	-0.02	1	0	-0.00941	1	0	0.1	1	0	0.04	1	0	0.1	0.96	0.0177288	0.08	1	0	0.2	0.62	0.207608	0.19	0.74	0.130768	0.19	0.64	0.19382	0.18	0.81	0.091515	0.14	0.98	0.00877392	0.2	0.74	0.130768
FBgn0036082	CG12362	0.95	0.43	0.366532	0.81	1	0	0.95	0.28	0.552842	-0.6	1	0	-1.53	0.84	0.0757207	-0.37	1	0	-2.11	1	0	-2.23	0.96	0.0177288	-4.3	1	0	-0.0012	1	0	0.19	0.73	0.136677	0.17	0.74	0.130768	0.06	1	0	0.22	0.68	0.167491	0.37	0.1	1
FBgn0033774	CG12374	-1.27	0.44	0.356547	-3.54	1.07e-06	5.97062	-4.01	6.07e-09	8.21681	0.33	1	0	0.08	1	0	0.14	1	0	-0.21	1	0	-0.7	0.4	0.39794	-0.21	1	0	-0.66	0.04	1.39794	-0.9	0.00108	2.96658	-0.43	0.34	0.468521	0.03	1	0	-0.59	0.5	0.30103	-0.63	0.4	0.39794
FBgn0031987	CG12375	-0.35	1	0	-0.49	1	0	-0.58	0.67	0.173925	-0.26	1	0	-0.32	0.61	0.21467	-0.16	1	0	-0.08	1	0	0.01	1	0	-0.04	1	0	-0.03	1	0	-0.14	0.9	0.0457575	-0.16	0.8	0.09691	-0.14	0.96	0.0177288	-0.25	0.88	0.0555173	-0.26	0.83	0.0809219
FBgn0033323	CG12376	0.73	0.64	0.19382	0.46	1	0	0.7	0.52	0.283997	1.78	1	0	-0.00776	1	0	-0.1	1	0	-0.07	1	0	-0.04	1	0	2.48	1	0	0.3	0.64	0.19382	0.29	0.72	0.142668	0.44	0.28	0.552842	0.16	0.95	0.0222764	0.34	0.57	0.244125	0.35	0.48	0.318759
FBgn0030676	CG12379	0.19	1	0	-0.21	1	0	-0.67	0.93	0.0315171	0.18	1	0	0.3	0.9	0.0457575	0.02	1	0	-0.08	1	0	-0.07	1	0	0.23	1	0	0.17	1	0	0.56	0.68	0.167491	0.16	1	0	-0.12	1	0	0.05	1	0	-0.16	1	0
FBgn0033624	CG12384	-0.00391	1	0	0.13	1	0	-0.08	1	0	-0.05	1	0	-0.09	0.99	0.00436481	-0.05	1	0	0.06	1	0	0.2	0.96	0.0177288	-0.00483	1	0	-0.0045	1	0	-0.09	0.97	0.0132283	-0.00705	1	0	0.25	0.9	0.0457575	0.16	1	0	-0.02	1	0
FBgn0037368	CG1239	-0.03	1	0	-0.13	1	0	0.2	1	0	-0.2	1	0	-0.37	0.62	0.207608	0.11	1	0	0.03	1	0	0.25	0.96	0.0177288	0.08	1	0	0.42	0.77	0.113509	0.44	0.79	0.102373	0.18	0.99	0.00436481	0.75	0.72	0.142668	0.19	1	0	-0.3	1	0
FBgn0033581	CG12391	-0.25	1	0	-0.17	1	0	-0.24	1	0	-0.26	1	0	-0.52	0.26	0.585027	0.02	1	0	-0.02	1	0	0.15	0.96	0.0177288	0.05	1	0	-0.1	0.96	0.0177288	0.12	0.96	0.0177288	0.16	0.85	0.0705811	0.52	0.33	0.481486	0.01	1	0	-0.12	1	0
FBgn0031768	CG12393	0.36	1	0	0.13	1	0	-0.00906	1	0	-0.24	1	0	-0.31	0.73	0.136677	-0.22	1	0	-0.04	1	0	0.00162	1	0	0.03	1	0	-0.18	0.82	0.0861861	-0.12	0.96	0.0177288	-0.1	0.96	0.0177288	0.02	1	0	-0.1	1	0	-0.00583	1	0
FBgn0030722	CG12395	0.95	0.61	0.21467	0.74	1	0	1.06	0.33	0.481486	0.91	1	0	0.63	0.9	0.0457575	0.85	1	0	-0.03	1	0	0.79	0.96	0.0177288	0.19	1	0	0.27	0.6	0.221849	0.47	0.13	0.886057	0.51	0.07	1.1549	0.31	0.92	0.0362122	0.4	0.88	0.0555173	0.49	0.67	0.173925
FBgn0030596	CG12398	1.67	1	0	0.51	1	0	-0.98	1	0	0.56	0.77	0.113509	0.63	0.28	0.552842	0.99	0.01	2	0.58	1	0	0.16	1	0	0.67	1	0	-0.59	1	0	-1.83	0.82	0.0861861	-2.55	0.64	0.19382	5.33	0.02	1.69897	2.64	0.71	0.148742	-0.04	1	0
FBgn0031505	CG12400	0.08	1	0	0.02	1	0	-0.35	0.99	0.00436481	0.2	1	0	0.31	0.63	0.200659	-0.07	1	0	-0.1	1	0	-0.04	1	0	0.08	1	0	0.21	0.75	0.124939	0.15	0.92	0.0362122	0.07	1	0	-0.11	0.96	0.0177288	0.41	0.06	1.22185	0.2	0.75	0.124939
FBgn0038202	CG12402	0.2	1	0	0.25	1	0	0.35	1	0	-0.15	1	0	0.67	0.54	0.267606	-0.21	1	0	0.0048	1	0	-0.13	1	0	-0.01	1	0	0.2	0.73	0.136677	0.17	0.87	0.0604807	0.27	0.49	0.309804	0.05	1	0	0.12	1	0	0.04	1	0
FBgn0032465	CG12404	0.23	1	0	0.07	1	0	0.22	1	0	-0.02	1	0	-0.12	0.97	0.0132283	0.14	1	0	-0.04	1	0	0.04	1	0	0.03	1	0	0.03	1	0	0.01	1	0	0.12	0.95	0.0222764	0.17	0.95	0.0222764	0.02	1	0	-0.02	1	0
FBgn0039588	CG12413	-0.03	1	0	0.22	1	0	0.07	1	0	0.1	1	0	0.12	0.99	0.00436481	0.22	1	0	0.07	1	0	0.15	0.96	0.0177288	0.12	1	0	0.28	0.77	0.113509	0.27	0.83	0.0809219	0.25	0.82	0.0861861	0.04	1	0	0.05	1	0	0.02	1	0
FBgn0037797	CG12420	3.13	1	0	0.13	1	0	2.27	1	0	-1.33	1	0	0.64	0.88	0.0555173	-0.05	1	0	0.28	1	0	-0.16	1	0	0.17	1	0	-2.25	0.68	0.167491	-0.89	0.96	0.0177288	-0.79	0.95	0.0222764	-0.41	1	0	-0.21	1	0	0.81	1	0
FBgn0039552	CG12426	0.76	1	0	0.81	1	0	0.98	0.75	0.124939	0.03	1	0	3.23	0.84	0.0757207	2.31	1	0	2.28	1	0	-0.04	1	0	0.08	1	0	0.77	0.14	0.853872	0.41	0.76	0.119186	0.44	0.64	0.19382	0.09	1	0	0.13	1	0	0.37	1	0
FBgn0039543	CG12428	-0.02	1	0	0.19	1	0	-0.41	0.74	0.130768	0.03	1	0	-0.19	0.84	0.0757207	0.04	1	0	0.09	1	0	0.06	1	0	0.00565	1	0	-0.17	0.76	0.119186	-0.47	0.03	1.52288	-0.12	0.9	0.0457575	0.04	1	0	-0.43	0.04	1.39794	-0.1	1	0
FBgn0032065	CG12438	0.86	0.86	0.0655015	0.66	1	0	1.03	0.47	0.327902	0.03	1	0	0.13	1	0	2.31	1	0	-0.07	1	0	2.18	0.96	0.0177288	0.08	1	0	0.08	1	0	0.07	1	0	0.46	0.27	0.568636	0.21	0.95	0.0222764	0.29	0.93	0.0315171	0.35	0.76	0.119186
FBgn0032094	CG12439	0.28	1	0	0.37	1	0	0.71	0.97	0.0132283	#N/A	#N/A	#N/A	#N/A	#N/A	#N/A	#N/A	#N/A	#N/A	#N/A	#N/A	#N/A	#N/A	#N/A	#N/A	#N/A	#N/A	#N/A	0.24	0.94	0.0268721	0.12	1	0	0.07	1	0	0.23	0.98	0.00877392	0.00549	1	0	0.11	1	0
FBgn0031201	CG12446	0.49	1	0	0.5	1	0	1.11	0.47	0.327902	-0.15	1	0	0.44	1	0	0.35	1	0	-0.03	1	0	0.61	0.99	0.00436481	0.17	1	0	0.15	0.98	0.00877392	-0.05	1	0	0.39	0.59	0.229148	0.29	0.93	0.0315171	0.26	1	0	0.45	0.75	0.124939
FBgn0028857	CG12448	0.82	0.57	0.244125	0.79	1	0	0.91	0.3	0.522879	-1.38	1	0	-0.03	1	0	-0.12	1	0	-4.46	1	0	-2.23	0.96	0.0177288	-1.92	1	0	0.26	0.65	0.187087	0.13	0.96	0.0177288	0.4	0.27	0.568636	0.03	1	0	0.19	0.99	0.00436481	0.28	0.73	0.136677
FBgn0035360	CG1246	-0.46	1	0	-0.63	1	0	-0.83	0.25	0.60206	0.32	1	0	0.51	0.49	0.309804	-0.01	1	0	0.07	1	0	-0.45	0.96	0.0177288	-0.11	1	0	0.61	0.05	1.30103	0.26	0.77	0.113509	0.43	0.31	0.508638	0.43	0.46	0.337242	0.34	0.73	0.136677	0.45	0.39	0.408935
FBgn0033861	CG12464	0.79	1	0	0.68	1	0	0.86	0.74	0.130768	3.26	1	0	2.39	0.9	0.0457575	0.05	1	0	-0.07	1	0	2.18	0.96	0.0177288	0.08	1	0	0.47	0.33	0.481486	0.45	0.44	0.356547	0.44	0.39	0.408935	0.28	0.93	0.0315171	0.27	1	0	0.32	0.97	0.0132283
FBgn0040371	CG12470	0.82	0.44	0.356547	0.6	1	0	0.87	0.25	0.60206	0.57	1	0	2.03	0.37	0.431798	1.25	1	0	0.19	1	0	0.24	1	0	-0.77	1	0	0.11	0.96	0.0177288	0.26	0.7	0.154902	0.19	0.83	0.0809219	0.16	0.87	0.0604807	0.32	0.24	0.619789	0.35	0.14	0.853872
FBgn0036809	CG12477	0.68	1	0	0.75	1	0	0.58	0.97	0.0132283	2.41	1	0	3.76	0.8	0.09691	3.67	1	0	0.82	1	0	1.22	0.96	0.0177288	-2.24	1	0	0.93	0.00932	2.03058	0.66	0.19	0.721246	0.5	0.39	0.408935	-0.05	1	0	0.05	1	0	0.2	1	0
FBgn0040871	CG12479	1.1	0.74	0.130768	0.7	1	0	0.99	0.69	0.161151	0.03	1	0	0.13	1	0	2.31	1	0	#N/A	#N/A	#N/A	#N/A	#N/A	#N/A	#N/A	#N/A	#N/A	0.00174	1	0	0.41	0.69	0.161151	0.28	0.85	0.0705811	-0.18	0.97	0.0132283	0.36	0.91	0.0409586	0.41	0.81	0.091515
FBgn0030537	CG12480	2.28	1	0	0.13	1	0	3.12	1	0	0.03	1	0	4.15	0.74	0.130768	0.05	1	0	-0.00634	1	0	-4.69	0.95	0.0222764	0.13	1	0	#N/A	#N/A	#N/A	#N/A	#N/A	#N/A	#N/A	#N/A	#N/A	#N/A	#N/A	#N/A	#N/A	#N/A	#N/A	#N/A	#N/A	#N/A
FBgn0030542	CG12481	-0.64	1	0	-1	1	0	-0.64	0.9	0.0457575	2.41	1	0	0.13	1	0	0.05	1	0	#N/A	#N/A	#N/A	#N/A	#N/A	#N/A	#N/A	#N/A	#N/A	-0.09	1	0	2.2	0.97	0.0132283	-0.03	1	0	#N/A	#N/A	#N/A	#N/A	#N/A	#N/A	#N/A	#N/A	#N/A
FBgn0040688	CG12483	#N/A	#N/A	#N/A	#N/A	#N/A	#N/A	#N/A	#N/A	#N/A	0.12	1	0	-0.00988	1	0	-0.58	1	0	-0.7	1	0	-1.03	0.96	0.0177288	-0.5	1	0	-0.72	0.71	0.148742	-0.31	0.98	0.00877392	-2.28	0.01	2	-0.27	1	0	-0.00521	1	0	-0.2	1	0
FBgn0086604	CG12484	0.33	1	0	-0.03	1	0	0.23	1	0	0.19	1	0	0.52	0.52	0.283997	-0.32	1	0	0.04	1	0	-0.32	0.96	0.0177288	-0.03	1	0	0.11	0.96	0.0177288	0.05	1	0	-0.07	1	0	-0.18	0.95	0.0222764	-0.23	0.97	0.0132283	-0.21	1	0
FBgn0034782	CG12490	-1.81	0.98	0.00877392	-3.51	0.97	0.0132283	-5.93	0.44	0.356547	1.35	0.15	0.823909	0.63	0.71	0.148742	0.64	1	0	-0.27	1	0	-2.63	0.76	0.119186	0.23	1	0	0.22	1	0	0.87	0.94	0.0268721	0.85	0.92	0.0362122	-0.24	1	0	-0.59	1	0	-2.5	0.65	0.187087
FBgn0034900	CG12491	#N/A	#N/A	#N/A	#N/A	#N/A	#N/A	#N/A	#N/A	#N/A	#N/A	#N/A	#N/A	#N/A	#N/A	#N/A	#N/A	#N/A	#N/A	-0.07	1	0	-0.04	1	0	3.34	1	0	#N/A	#N/A	#N/A	#N/A	#N/A	#N/A	#N/A	#N/A	#N/A	#N/A	#N/A	#N/A	#N/A	#N/A	#N/A	#N/A	#N/A	#N/A
FBgn0035571	CG12493	0.43	1	0	0.63	1	0	0.51	0.95	0.0222764	-0.05	1	0	0.3	0.9	0.0457575	-0.35	1	0	-0.49	1	0	-0.41	0.96	0.0177288	-0.45	1	0	0.15	0.94	0.0268721	0.32	0.63	0.200659	0.27	0.69	0.161151	0.03	1	0	0.03	1	0	0.27	0.94	0.0268721
FBgn0040385	CG12496	0.18	1	0	-0.26	1	0	-0.49	1	0	1.19	1	0	1.71	0.58	0.236572	-0.68	1	0	-1.5	1	0	-0.72	0.96	0.0177288	-2.16	1	0	#N/A	#N/A	#N/A	#N/A	#N/A	#N/A	#N/A	#N/A	#N/A	-0.03	1	0	0.07	1	0	2.32	1	0
FBgn0040356	CG12498	1.4	0.38	0.420216	1.02	1	0	1.48	0.2	0.69897	#N/A	#N/A	#N/A	#N/A	#N/A	#N/A	#N/A	#N/A	#N/A	-0.04	1	0	-2.36	0.96	0.0177288	-2.24	1	0	0.24	0.9	0.0457575	0.14	1	0	0.32	0.78	0.107905	0.18	0.97	0.0132283	0.32	0.98	0.00877392	0.31	1	0
FBgn0038968	CG12499	-0.56	0.5	0.30103	-0.27	1	0	-0.49	0.5	0.30103	0.1	1	0	-0.00379	1	0	0.12	1	0	0.06	1	0	0.00547	1	0	2.66e-05	1	0	-0.19	0.73	0.136677	-0.06	1	0	-0.11	0.94	0.0268721	0.7	0.14	0.853872	0.28	0.98	0.00877392	0.00512	1	0
FBgn0035171	CG12502	-0.89	1	0	-0.1	1	0	-0.44	1	0	0.3	1	0	0.35	0.85	0.0705811	-0.14	1	0	0.47	1	0	-0.48	0.96	0.0177288	0.22	1	0	0.1	1	0	-0.15	0.96	0.0177288	0.07	1	0	-0.05	1	0	-0.17	1	0	-0.03	1	0
FBgn0031276	CG12506	0.58	1	0	1.14	1	0	-0.12	1	0	0.00305	1	0	-0.56	1	0	-0.65	1	0	-0.56	1	0	-0.16	1	0	-1.22	1	0	0.37	0.54	0.267606	0.6	0.13	0.886057	0.59	0.12	0.920819	-0.08	1	0	0.53	0.26	0.585027	0.64	0.07	1.1549
FBgn0030729	CG12507	0.32	1	0	-0.00362	1	0	0.11	1	0	2.41	1	0	4.92	0.67	0.173925	0.06	1	0	-0.03	1	0	-0.72	0.96	0.0177288	0.39	1	0	-1.41	0.84	0.0757207	-1.42	0.87	0.0604807	-0.41	1	0	-0.03	1	0	-0.12	1	0	0.29	1	0
FBgn0031729	CG12511	0.28	1	0	0.23	1	0	0.57	1	0	3.26	1	0	3.23	0.84	0.0757207	2.31	1	0	-0.04	1	0	-2.36	0.96	0.0177288	0.16	1	0	-0.08	1	0	-0.1	1	0	0.15	0.94	0.0268721	-0.28	0.95	0.0222764	0.04	1	0	0.05	1	0
FBgn0031703	CG12512	-1.25	0.77	0.113509	-1.12	1	0	-2.58	0.04	1.39794	0.22	1	0	0.23	0.79	0.102373	-0.2	1	0	0.15	1	0	-0.03	1	0	0.08	1	0	-0.06	1	0	-0.11	0.95	0.0222764	-0.06	1	0	0.2	0.74	0.130768	0.23	0.65	0.187087	0.29	0.34	0.468521
FBgn0039577	CG12516	0.63	1	0	0.48	1	0	1.13	0.24	0.619789	3.26	1	0	0.13	1	0	0.05	1	0	-2.39	1	0	1.22	0.96	0.0177288	-2.24	1	0	0.46	0.25	0.60206	0.57	0.12	0.920819	0.68	0.02	1.69897	0.11	1	0	0.25	0.94	0.0268721	0.38	0.59	0.229148
FBgn0032311	CG12517	-2.78	0.45	0.346787	-5.79	1	0	-5.99	0.41	0.387216	-0.8	1	0	-1.68	0.03	1.52288	-0.92	1	0	-0.51	1	0	-0.05	1	0	-0.25	1	0	-4.55	0.67	0.173925	-2.26	0.77	0.113509	-0.79	0.97	0.0132283	1.44	0.89	0.05061	-3.07	1	0	-3.14	1	0
FBgn0036872	CG12519	2.77	0.69	0.161151	2.86	1	0	3.49	0.27	0.568636	-1.33	1	0	-0.84	0.8	0.09691	-0.28	1	0	0.12	1	0	-0.95	0.84	0.0757207	-0.4	1	0	-1.17	0.72	0.142668	-1.64	0.59	0.229148	0.33	1	0	0.95	0.84	0.0757207	1.07	0.82	0.0861861	1.65	0.28	0.552842
FBgn0036324	CG12520	-5.6	0.63	0.200659	-3.18	0.97	0.0132283	-3.3	0.32	0.49485	-0.89	1	0	0.54	0.84	0.0757207	-0.89	1	0	-0.19	1	0	0.67	0.87	0.0604807	-0.4	1	0	-1.14	0.42	0.376751	-1.4	0.31	0.508638	-1.3	0.31	0.508638	-0.33	0.96	0.0177288	0.29	1	0	-0.04	1	0
FBgn0040816	CG12521	1.05	0.64	0.19382	0.79	1	0	1.12	0.41	0.387216	-2.38	1	0	-2.27	0.9	0.0457575	-2.35	1	0	#N/A	#N/A	#N/A	#N/A	#N/A	#N/A	#N/A	#N/A	#N/A	0.01	1	0	0.23	0.87	0.0604807	0.21	0.87	0.0604807	0.18	0.96	0.0177288	0.42	0.47	0.327902	0.48	0.28	0.552842
FBgn0036131	CG12522	1.1	0.72	0.142668	2.34	0.02	1.69897	1.82	0.1	1	-1.37	1	0	0.14	1	0	-0.81	1	0	2.01	1	0	-0.15	1	0	1.86	1	0	-0.72	0.78	0.107905	-1.08	0.6	0.221849	-0.89	0.67	0.173925	-1.55	0.28	0.552842	-0.49	1	0	-1.93	0.14	0.853872
FBgn0036102	CG12523	#N/A	#N/A	#N/A	#N/A	#N/A	#N/A	#N/A	#N/A	#N/A	-3.23	1	0	-3.13	0.84	0.0757207	-0.95	1	0	-1.3	1	0	-3.18	0.65	0.187087	-2.02	1	0	3.59	0.81	0.091515	-0.09	1	0	-0.03	1	0	#N/A	#N/A	#N/A	#N/A	#N/A	#N/A	#N/A	#N/A	#N/A
FBgn0031064	CG12531	-0.12	1	0	0.04	1	0	-0.16	1	0	0.46	1	0	0.56	0.44	0.356547	0.33	1	0	0.04	1	0	-0.74	0.81	0.091515	-0.35	1	0	0.21	0.78	0.107905	-0.08	1	0	0.39	0.31	0.508638	0.05	1	0	0.03	1	0	0.00268	1	0
FBgn0029657	CG12535	0.71	1	0	0.8	1	0	1.36	0.25	0.60206	0.31	1	0	-0.95	0.91	0.0409586	-1.04	1	0	-2.26	1	0	-1.24	0.96	0.0177288	-1.67	1	0	0.07	1	0	0.28	0.86	0.0655015	0.48	0.42	0.376751	0.49	0.69	0.161151	0.26	1	0	0.36	0.95	0.0222764
FBgn0038157	CG12538	-2.41	1	0	0.00695	1	0	1.27	1	0	0.03	1	0	0.13	1	0	2.31	1	0	#N/A	#N/A	#N/A	#N/A	#N/A	#N/A	#N/A	#N/A	#N/A	2.15	0.76	0.119186	0.67	1	0	1.99	0.8	0.09691	2.26	0.96	0.0177288	0.07	1	0	3.7	0.93	0.0315171
FBgn0030586	CG12539	1.28	0.11	0.958607	1.04	0.46	0.337242	1.13	0.13	0.886057	-2.38	1	0	-0.00776	1	0	-0.1	1	0	-2.39	1	0	-0.14	1	0	0.16	1	0	-0.17	1	0	-0.18	1	0	-2.41	0.94	0.0268721	-0.87	1	0	0.17	1	0	-0.81	1	0
FBgn0030570	CG12540	3.71	1	0	0.13	1	0	-0.06	1	0	-3.78	1	0	-3.68	0.79	0.102373	-3.75	1	0	-2.39	1	0	0.69	1	0	0.16	1	0	-2.47	0.94	0.0268721	0.66	1	0	-2.41	0.94	0.0268721	-0.03	1	0	2.45	1	0	-0.00902	1	0
FBgn0029930	CG12541	-0.52	1	0	-0.43	1	0	-0.47	1	0	0.25	1	0	0.47	0.77	0.113509	-0.13	1	0	0.32	1	0	-0.13	1	0	0.22	1	0	-0.25	0.84	0.0757207	-0.18	0.96	0.0177288	-0.28	0.8	0.09691	-0.23	0.96	0.0177288	-0.3	1	0	0.07	1	0
FBgn0037178	CG12546	#N/A	#N/A	#N/A	#N/A	#N/A	#N/A	#N/A	#N/A	#N/A	-5.06	1	0	0.89	0.91	0.0409586	-0.77	1	0	-0.07	1	0	5.46	0.88	0.0555173	0.08	1	0	#N/A	#N/A	#N/A	#N/A	#N/A	#N/A	#N/A	#N/A	#N/A	#N/A	#N/A	#N/A	#N/A	#N/A	#N/A	#N/A	#N/A	#N/A
FBgn0250830	CG12547	-0.03	1	0	-0.11	1	0	-0.12	1	0	-0.02	1	0	-0.17	0.85	0.0705811	0.11	1	0	0.11	1	0	0.36	0.41	0.387216	0.18	1	0	-0.04	1	0	0.11	0.96	0.0177288	-0.09	0.95	0.0222764	0.12	1	0	-0.08	1	0	-0.11	1	0
FBgn0031974	CG12560	-0.05	1	0	-0.19	1	0	-0.55	0.88	0.0555173	0.25	1	0	0.04	1	0	0.04	1	0	0.11	1	0	0.22	0.96	0.0177288	0.1	1	0	-0.41	0.4	0.39794	0.08	1	0	-0.19	0.87	0.0604807	-0.00406	1	0	0.05	1	0	0.2	1	0
FBgn0039958	CG12567	0.000251	1	0	0.14	1	0	0.08	1	0	-0.01	1	0	-0.31	0.6	0.221849	0.22	1	0	0.08	1	0	0.41	0.66	0.180456	0.19	1	0	-0.1	0.95	0.0222764	0.04	1	0	-0.00871	1	0	0.23	0.92	0.0362122	-0.03	1	0	-0.24	1	0
FBgn0031190	CG12576	0.09	1	0	0.19	1	0	0.14	1	0	-0.09	1	0	-0.06	1	0	-0.04	1	0	0.07	1	0	0.16	0.96	0.0177288	0.03	1	0	-0.1	0.95	0.0222764	-0.09	0.97	0.0132283	-0.12	0.88	0.0555173	0.12	0.99	0.00436481	0.05	1	0	0.07	1	0
FBgn0037213	CG12581	-0.06	1	0	-0.14	1	0	-0.14	1	0	0.04	1	0	0.37	0.53	0.275724	-0.15	1	0	0.1	1	0	-0.22	0.96	0.0177288	-0.03	1	0	-0.22	0.57	0.244125	-0.11	0.96	0.0177288	-0.16	0.78	0.107905	-0.32	0.22	0.657577	-0.18	0.87	0.0604807	-0.28	0.39	0.408935
FBgn0037215	CG12582	-0.13	1	0	-0.03	1	0	-0.19	1	0	0.17	1	0	0.12	0.92	0.0362122	0.02	1	0	0.03	1	0	-0.1	0.98	0.00877392	-0.02	1	0	0.01	1	0	-0.11	0.95	0.0222764	0.00788	1	0	-0.09	0.96	0.0177288	-0.17	0.9	0.0457575	-0.22	0.63	0.200659
FBgn0040684	CG12589	0.46	1	0	0.13	1	0	0.42	1	0	-2.38	1	0	-0.00776	1	0	-2.35	1	0	-2.39	1	0	-2.36	0.96	0.0177288	-2.24	1	0	0.17	0.88	0.0555173	0.31	0.6	0.221849	0.5	0.11	0.958607	0.04	1	0	0.22	1	0	0.32	1	0
FBgn0037294	CG12590	-1.8	0.95	0.0222764	0.33	1	0	-0.12	1	0	-0.85	1	0	0.89	0.95	0.0222764	-0.11	1	0	3.67	1	0	2.18	0.96	0.0177288	2.48	1	0	0.7	0.9	0.0457575	1.52	0.42	0.376751	0.87	0.81	0.091515	-0.64	0.93	0.0315171	0.1	1	0	0.04	1	0
FBgn0037811	CG12592	0.09	1	0	0.46	1	0	0.23	1	0	0.00352	1	0	-0.33	0.68	0.167491	0.1	1	0	-0.05	1	0	0.05	1	0	-0.22	1	0	0.09	1	0	0.03	1	0	-0.02	1	0	0.53	0.61	0.21467	0.21	1	0	0.34	0.97	0.0132283
FBgn0037941	CG12594	-0.38	1	0	-0.33	1	0	-0.21	1	0	0.00099	1	0	0.24	0.93	0.0315171	-0.96	0.67	0.173925	-0.08	1	0	-0.35	0.96	0.0177288	-0.35	1	0	0.14	0.96	0.0177288	-0.01	1	0	-0.05	1	0	0.00634	1	0	-0.18	1	0	0.09	1	0
FBgn0035481	CG12605	0.44	1	0	0.43	1	0	0.52	0.8	0.09691	0.21	1	0	0.49	0.69	0.161151	-0.0027	1	0	0.14	1	0	-0.41	0.96	0.0177288	-0.45	1	0	0.38	0.1	1	0.35	0.2	0.69897	0.35	0.17	0.769551	0.09	0.96	0.0177288	0.3	0.36	0.443697	0.21	0.7	0.154902
FBgn0035545	CG12607	-5.03	0.00323	2.4908	-6.73	0.00605	2.21824	-5.07	0.00155	2.80967	0.03	1	0	2.39	0.9	0.0457575	0.05	1	0	-0.57	1	0	-2.26	0.22	0.657577	-1.47	1	0	#N/A	#N/A	#N/A	#N/A	#N/A	#N/A	#N/A	#N/A	#N/A	-3.16	0.92	0.0362122	-3.07	1	0	-3.14	1	0
FBgn0030630	CG12608	-0.27	1	0	-0.3	1	0	-0.34	1	0	-0.05	1	0	-0.12	0.91	0.0409586	0.05	1	0	-0.00645	1	0	0.19	0.96	0.0177288	0.1	1	0	0.03	1	0	0.06	1	0	-0.05	1	0	0.28	0.9	0.0457575	0.01	1	0	-0.1	1	0
FBgn0030952	CG12609	0.77	0.88	0.0555173	0.56	1	0	0.98	0.42	0.376751	-1.38	1	0	-0.56	1	0	-1.49	1	0	3.67	1	0	-0.04	1	0	0.08	1	0	0.37	0.45	0.346787	0.49	0.22	0.657577	0.43	0.28	0.552842	0.22	0.91	0.0409586	0.21	0.99	0.00436481	0.38	0.54	0.267606
FBgn0040996	CG12617	0.96	0.35	0.455932	0.69	1	0	1.07	0.14	0.853872	3.26	1	0	0.13	1	0	2.31	1	0	-2.39	1	0	0.69	1	0	-2.24	1	0	0.35	0.51	0.29243	0.38	0.51	0.29243	0.42	0.32	0.49485	0.32	0.67	0.173925	0.42	0.37	0.431798	0.45	0.28	0.552842
FBgn0032626	CG12620	1.09	0.31	0.508638	0.7	1	0	1.07	0.19	0.721246	2.41	1	0	0.13	1	0	2.31	1	0	-0.04	1	0	-2.36	0.96	0.0177288	-2.24	1	0	0.59	0.07	1.1549	0.51	0.2	0.69897	0.67	0.02	1.69897	0.42	0.24	0.619789	0.43	0.26	0.585027	0.58	0.04	1.39794
FBgn0030224	CG12637	1.09	0.5	0.30103	0.48	1	0	0.94	0.5	0.30103	0.00574	1	0	-0.00778	1	0	-2.35	1	0	-0.07	1	0	2.18	0.96	0.0177288	0.08	1	0	0.15	0.95	0.0222764	0.26	0.79	0.102373	0.24	0.78	0.107905	0.25	0.87	0.0604807	0.43	0.42	0.376751	0.45	0.33	0.481486
FBgn0030202	CG12640	#N/A	#N/A	#N/A	#N/A	#N/A	#N/A	#N/A	#N/A	#N/A	-2.38	1	0	-2.27	0.9	0.0457575	-2.35	1	0	#N/A	#N/A	#N/A	#N/A	#N/A	#N/A	#N/A	#N/A	#N/A	2.21	0.96	0.0177288	2.2	0.97	0.0132283	-0.03	1	0	0.89	0.96	0.0177288	-3.07	1	0	-0.81	1	0
FBgn0040942	CG12643	-0.14	1	0	-0.15	1	0	0.35	1	0	0.59	1	0	0.78	0.36	0.443697	0.18	1	0	-0.1	1	0	-0.57	0.96	0.0177288	-0.1	1	0	0.26	0.84	0.0757207	0.51	0.41	0.387216	0.18	0.94	0.0268721	-0.48	0.81	0.091515	-0.56	0.73	0.136677	-0.74	0.4	0.39794
FBgn0030181	CG12645	-0.42	1	0	-0.71	1	0	0.13	1	0	0.03	1	0	3.76	0.8	0.09691	3.67	1	0	2.28	1	0	-0.04	1	0	0.08	1	0	0.61	0.63	0.200659	0.64	0.65	0.187087	0.76	0.41	0.387216	0.06	1	0	0.84	0.65	0.187087	0.73	0.75	0.124939
FBgn0035517	CG1265	-0.18	1	0	-0.17	1	0	-0.83	0.3	0.522879	-0.14	1	0	0.15	0.95	0.0222764	-0.14	1	0	0.06	1	0	0.12	0.99	0.00436481	0.04	1	0	-0.21	0.68	0.167491	-0.03	1	0	-0.11	0.93	0.0315171	-0.08	1	0	0.24	0.96	0.0177288	0.17	1	0
FBgn0031080	CG12655	-0.08	1	0	-0.18	1	0	-0.14	1	0	-0.23	1	0	0.48	0.89	0.05061	-0.54	1	0	0.33	1	0	0.23	1	0	0.43	1	0	-0.71	0.45	0.346787	-0.14	1	0	-0.16	1	0	0.51	0.91	0.0409586	0.36	1	0	0.5	1	0
FBgn0040929	CG12659	-0.15	1	0	-0.14	1	0	-0.03	1	0	-0.22	1	0	-0.13	0.99	0.00436481	0.18	1	0	0.08	1	0	0.16	0.96	0.0177288	0.15	1	0	-0.65	0.46	0.337242	-0.36	0.87	0.0604807	-0.07	1	0	0.52	0.9	0.0457575	-0.09	1	0	0.21	1	0
FBgn0030071	CG12661	0.73	1	0	1.5	1	0	0.86	0.98	0.00877392	0.00242	1	0	-0.03	1	0	0.83	1	0	-2.76	1	0	-0.56	0.96	0.0177288	-0.48	1	0	1.41	0.16	0.79588	1.16	0.42	0.376751	0.97	0.51	0.29243	-0.16	1	0	0.53	0.94	0.0268721	0.3	1	0
FBgn0030074	CG12662	-0.03	1	0	0.13	1	0	2.27	1	0	-0.55	1	0	-0.04	1	0	0.08	1	0	0.46	1	0	0.24	1	0	-0.23	1	0	2.21	0.96	0.0177288	3.05	0.92	0.0362122	2.29	0.95	0.0222764	4.58	0.75	0.124939	3.31	0.98	0.00877392	-0.00901	1	0
FBgn0030886	CG12672	-1.34	0.93	0.0315171	-0.59	1	0	-1.65	0.56	0.251812	0.44	1	0	0.39	0.98	0.00877392	-0.6	1	0	0.32	1	0	-0.16	1	0	-0.29	1	0	0.31	0.96	0.0177288	-0.02	1	0	-0.32	0.96	0.0177288	0.05	1	0	0.45	1	0	0.28	1	0
FBgn0031388	CG12674	0.36	1	0	0.77	1	0	0.87	0.4	0.39794	2.41	1	0	0.13	1	0	0.05	1	0	-2.39	1	0	-0.14	1	0	-2.24	1	0	0.34	0.55	0.259637	0.25	0.82	0.0861861	0.29	0.65	0.187087	0.2	0.96	0.0177288	0.06	1	0	0.26	0.99	0.00436481
FBgn0031103	CG12679	0.63	1	0	0.58	1	0	0.59	0.87	0.0604807	0.86	1	0	-0.00771	1	0	-2.35	1	0	#N/A	#N/A	#N/A	#N/A	#N/A	#N/A	#N/A	#N/A	#N/A	0.37	0.45	0.346787	0.32	0.64	0.19382	0.4	0.34	0.468521	0.21	0.91	0.0409586	0.46	0.32	0.49485	0.47	0.28	0.552842
FBgn0029740	CG12680	0.49	1	0	0.06	1	0	1.17	0.44	0.356547	0.03	1	0	3.23	0.84	0.0757207	0.05	1	0	#N/A	#N/A	#N/A	#N/A	#N/A	#N/A	#N/A	#N/A	#N/A	0.16	0.99	0.00436481	0.12	1	0	0.39	0.72	0.142668	0.33	0.94	0.0268721	0.42	0.94	0.0268721	0.54	0.75	0.124939
FBgn0029730	CG12681	0.79	0.71	0.148742	0.59	1	0	1.06	0.24	0.619789	0.63	1	0	0.68	0.9	0.0457575	0.28	1	0	-1.41	1	0	0.23	1	0	0.17	1	0	0.3	0.66	0.180456	0.33	0.65	0.187087	0.37	0.45	0.346787	0.29	0.79	0.102373	0.37	0.63	0.200659	0.38	0.56	0.251812
FBgn0029729	CG12682	0.41	1	0	-0.01	1	0	0.24	1	0	#N/A	#N/A	#N/A	#N/A	#N/A	#N/A	#N/A	#N/A	#N/A	#N/A	#N/A	#N/A	#N/A	#N/A	#N/A	#N/A	#N/A	#N/A	0.49	0.56	0.251812	0.5	0.6	0.221849	0.52	0.49	0.309804	-0.09	1	0	0.17	1	0	0.16	1	0
FBgn0029717	CG12684	0.65	0.96	0.0177288	0.4	1	0	0.7	0.68	0.167491	-2.38	1	0	-0.00769	1	0	0.74	1	0	-0.07	1	0	3.54	0.96	0.0177288	0.08	1	0	0.44	0.19	0.721246	0.37	0.43	0.366532	0.49	0.13	0.886057	0.27	0.83	0.0809219	0.43	0.46	0.337242	0.34	0.67	0.173925
FBgn0029707	CG12688	-0.1	1	0	1.38	1	0	-2.45	1	0	-4.15	1	0	-1.79	0.82	0.0861861	-4.13	1	0	-0.03	1	0	-3.21	0.96	0.0177288	-3.09	1	0	-2.72	0.59	0.229148	-0.67	0.99	0.00436481	-1.26	0.87	0.0604807	-0.33	1	0	-1.05	1	0	0.86	1	0
FBgn0029952	CG12689	0.97	0.5	0.30103	0.78	1	0	0.96	0.36	0.443697	0.95	1	0	1.13	0.86	0.0655015	-0.12	1	0	-0.88	1	0	-0.99	0.98	0.00877392	-3.09	1	0	0.28	0.66	0.180456	0.39	0.46	0.337242	0.37	0.41	0.387216	0.25	0.81	0.091515	0.42	0.32	0.49485	0.35	0.5	0.30103
FBgn0029701	CG12691	0.53	1	0	-0.05	1	0	0.4	1	0	0.03	1	0	2.39	0.9	0.0457575	0.05	1	0	#N/A	#N/A	#N/A	#N/A	#N/A	#N/A	#N/A	#N/A	#N/A	-0.3	0.8	0.09691	-0.05	1	0	0.05	1	0	0.37	0.92	0.0362122	0.6	0.7	0.154902	0.59	0.68	0.167491
FBgn0029703	CG12692	0.77	0.75	0.124939	0.61	1	0	0.95	0.35	0.455932	-3.23	1	0	0.51	1	0	1.1	1	0	-3.77	1	0	-3.74	0.96	0.0177288	-3.62	1	0	0.28	0.61	0.21467	0.18	0.91	0.0409586	0.29	0.59	0.229148	0.08	1	0	0.24	0.96	0.0177288	0.38	0.56	0.251812
FBgn0029705	CG12693	1.14	0.35	0.455932	0.88	1	0	1.3	0.13	0.886057	0.86	1	0	-0.00778	1	0	-0.1	1	0	-0.07	1	0	-0.04	1	0	2.48	1	0	0.35	0.2	0.69897	0.33	0.32	0.49485	0.49	0.02	1.69897	0.24	0.87	0.0604807	0.31	0.71	0.148742	0.32	0.66	0.180456
FBgn0030721	CG12698	0.89	0.44	0.356547	0.73	1	0	1.09	0.14	0.853872	0.28	1	0	0.11	1	0	0.59	1	0	0.14	1	0	0.28	1	0	0.97	1	0	0.3	0.58	0.236572	0.26	0.74	0.130768	0.42	0.26	0.585027	0.48	0.37	0.431798	0.33	0.8	0.09691	0.48	0.35	0.455932
FBgn0046294	CG12699	0.82	0.41	0.387216	0.61	1	0	1.02	0.11	0.958607	-0.24	1	0	-0.81	0.83	0.0809219	0.37	1	0	-0.07	1	0	4.41	0.96	0.0177288	2.47	1	0	0.27	0.68	0.167491	0.28	0.71	0.148742	0.32	0.53	0.275724	0.17	0.91	0.0409586	0.21	0.85	0.0705811	0.38	0.24	0.619789
FBgn0031070	CG12702	-0.13	1	0	0.06	1	0	-0.26	1	0	-0.49	0.99	0.00436481	-0.76	0.12	0.920819	-0.03	1	0	0.07	1	0	0.11	0.99	0.00436481	-0.04	1	0	0.44	0.45	0.346787	0.21	0.93	0.0315171	0.07	1	0	0.67	0.7	0.154902	0.38	1	0	0.26	1	0
FBgn0030666	CG12708	-0.39	1	0	-0.36	1	0	-0.7	0.71	0.148742	-1.56	0.01	2	-1.96	0.000486	3.31336	-1.14	0.22	0.657577	-0.72	0.16	0.79588	-1.23	1.09e-05	4.96257	-0.6	0.76	0.119186	-0.7	0.99	0.00436481	-0.99	0.96	0.0177288	-0.97	0.94	0.0268721	4.16	0.00932	2.03058	1.88	0.74	0.130768	1.05	1	0
FBgn0035392	CG1271	-0.26	1	0	0.21	1	0	-0.13	1	0	0.00614	1	0	-0.02	1	0	0.15	1	0	-0.06	1	0	-0.06	1	0	0.02	1	0	0.06	1	0	0.03	1	0	0.06	1	0	-0.05	1	0	-0.04	1	0	-0.12	1	0
FBgn0036536	CG12713	0.09	1	0	0.32	1	0	0.03	1	0	-0.33	1	0	-0.58	0.36	0.443697	-0.02	1	0	-0.04	1	0	0.31	0.94	0.0268721	0.11	1	0	-0.43	0.49	0.309804	-0.16	0.97	0.0132283	-0.21	0.9	0.0457575	0.55	0.71	0.148742	0.11	1	0	0.04	1	0
FBgn0030443	CG12715	0.44	1	0	0.76	0.7	0.154902	-0.05	1	0	0.03	1	0	3.76	0.8	0.09691	2.31	1	0	2.28	1	0	3.01	0.96	0.0177288	0.08	1	0	1.2	0.95	0.0222764	1.19	0.97	0.0132283	1.29	0.94	0.0268721	-2.31	0.96	0.0177288	-2.22	1	0	-2.3	1	0
FBgn0030439	CG12716	#N/A	#N/A	#N/A	#N/A	#N/A	#N/A	#N/A	#N/A	#N/A	-1.26	1	0	-0.67	0.85	0.0705811	0.89	1	0	-0.98	1	0	1.01	0.59	0.229148	0.68	1	0	0.48	1	0	-0.61	1	0	0.14	1	0	2.75	0.03	1.52288	0.72	1	0	0.22	1	0
FBgn0030420	CG12717	-0.32	1	0	-0.11	1	0	-0.00247	1	0	-0.2	1	0	-0.4	0.54	0.267606	0.1	1	0	-0.000754	1	0	0.21	0.96	0.0177288	0.09	1	0	-0.08	1	0	-0.15	0.96	0.0177288	-0.14	0.95	0.0222764	0.55	0.24	0.619789	0.1	1	0	-0.05	1	0
FBgn0030373	CG12721	-0.43	1	0	-0.98	1	0	-0.62	1	0	-0.34	1	0	-0.64	0.34	0.468521	-0.13	1	0	-0.14	1	0	-0.19	0.96	0.0177288	-0.01	1	0	1.04	0.94	0.0268721	-0.19	1	0	1.59	0.78	0.107905	3.03	0.07	1.1549	2.1	0.5	0.30103	0.46	1	0
FBgn0030459	CG12723	2.28	1	0	0.13	1	0	2.27	1	0	0.03	1	0	2.39	0.9	0.0457575	3.14	1	0	-0.04	1	0	-0.14	1	0	0.16	1	0	#N/A	#N/A	#N/A	#N/A	#N/A	#N/A	#N/A	#N/A	#N/A	3.11	0.92	0.0362122	0.07	1	0	2.32	1	0
FBgn0030483	CG12725	0.71	1	0	0.56	1	0	0.93	0.67	0.173925	0.00372	1	0	-0.86	0.99	0.00436481	-3.2	1	0	-3.24	1	0	-0.99	0.98	0.00877392	-3.09	1	0	0.7	0.51	0.29243	0.69	0.59	0.229148	0.63	0.59	0.229148	0.12	1	0	0.37	1	0	0.18	1	0
FBgn0029825	CG12728	-0.00419	1	0	0.14	1	0	-0.04	1	0	-0.12	1	0	-0.23	0.8	0.09691	0.21	1	0	0.03	1	0	0.37	0.6	0.221849	0.11	1	0	-0.12	0.96	0.0177288	0.05	1	0	-0.04	1	0	0.37	0.66	0.180456	0.25	0.97	0.0132283	0.18	1	0
FBgn0029816	CG12729	1.1	1	0	0.27	1	0	0.69	1	0	-3.23	1	0	-3.13	0.84	0.0757207	-3.2	1	0	-0.07	1	0	2.18	0.96	0.0177288	0.08	1	0	-0.01	1	0	0.46	0.57	0.244125	0.29	0.82	0.0861861	0.22	0.97	0.0132283	0.24	1	0	0.19	1	0
FBgn0035522	CG1273	-0.06	1	0	0.01	1	0	0.33	1	0	-2.52	0.55	0.259637	-2.17	0.4	0.39794	-0.66	1	0	-1.07	1	0	-1.25	0.96	0.0177288	-2	1	0	2.14	0.34	0.468521	1.94	0.52	0.283997	2.54	0.17	0.769551	-0.03	1	0	-0.79	0.98	0.00877392	-0.75	1	0
FBgn0029771	CG12730	-0.33	1	0	-0.37	1	0	-0.25	1	0	-0.04	1	0	0.15	0.98	0.00877392	-0.39	1	0	0.04	1	0	-0.35	0.96	0.0177288	-0.22	1	0	-0.25	0.76	0.119186	-0.32	0.68	0.167491	-0.22	0.82	0.0861861	-0.25	0.83	0.0809219	-0.1	1	0	-0.11	1	0
FBgn0033184	CG12736	0.26	1	0	0.21	1	0	0.22	1	0	-0.11	1	0	0.14	0.9	0.0457575	0.04	1	0	-0.06	1	0	0.05	1	0	0.2	1	0	-0.000238	1	0	0.00425	1	0	0.09	0.96	0.0177288	0.03	1	0	0.19	0.84	0.0757207	0.18	0.85	0.0705811
FBgn0033459	CG12744	0.27	1	0	0.17	1	0	0.25	1	0	0.21	1	0	0.15	0.93	0.0315171	0.06	1	0	0.15	1	0	-0.05	1	0	0.01	1	0	-0.31	0.95	0.0222764	-0.04	1	0	0.47	0.81	0.091515	0.89	0.57	0.244125	0.29	1	0	0.25	1	0
FBgn0037341	CG12746	-0.25	1	0	-0.32	1	0	-0.58	0.75	0.124939	0.11	1	0	0.11	0.95	0.0222764	0.00991	1	0	-0.07	1	0	-0.07	1	0	0.01	1	0	-0.02	1	0	-0.16	0.85	0.0705811	0.00318	1	0	-0.17	0.94	0.0268721	-0.15	1	0	-0.09	1	0
FBgn0035321	CG1275	0.07	1	0	0.08	1	0	0.00408	1	0	-0.14	1	0	0.02	1	0	-0.04	1	0	-0.05	1	0	0.28	0.86	0.0655015	0.04	1	0	-0.1	0.95	0.0222764	-0.06	1	0	-0.02	1	0	-0.03	1	0	-0.05	1	0	-0.00303	1	0
FBgn0035476	CG12766	-2.37	0.29	0.537602	-2.26	0.51	0.29243	-1.8	0.31	0.508638	0.39	1	0	0.98	0.42	0.376751	-0.68	1	0	0.36	1	0	0.43	0.96	0.0177288	0.5	1	0	0.36	0.68	0.167491	0.5	0.48	0.318759	0.06	1	0	0.27	0.96	0.0177288	0.83	0.19	0.721246	0.4	0.89	0.05061
FBgn0037206	CG12768	-0.14	1	0	-0.1	1	0	0.23	1	0	-0.21	1	0	0.27	0.97	0.0132283	-0.73	1	0	-0.35	1	0	-0.52	0.96	0.0177288	-0.37	1	0	0.06	1	0	-0.11	1	0	-0.29	0.87	0.0604807	0.06	1	0	0.23	1	0	-0.05	1	0
FBgn0033252	CG12769	-1.25	0.97	0.0132283	-0.34	1	0	-0.97	0.95	0.0222764	0.12	1	0	0.22	0.9	0.0457575	0.07	1	0	0.09	1	0	-0.16	1	0	0.12	1	0	0.00556	1	0	-0.16	0.96	0.0177288	-0.1	0.99	0.00436481	-0.24	0.92	0.0362122	-0.12	1	0	-0.28	0.95	0.0222764
FBgn0030055	CG12772	-0.07	1	0	-0.03	1	0	-0.00841	1	0	-0.24	1	0	-0.38	0.65	0.187087	-0.12	1	0	0.06	1	0	0.19	0.96	0.0177288	0.09	1	0	-0.21	0.7	0.154902	-0.13	0.93	0.0315171	-0.22	0.67	0.173925	0.00534	1	0	0.11	1	0	0.08	1	0
FBgn0024365	CG12773	-0.1	1	0	-0.04	1	0	-0.3	0.96	0.0177288	-0.08	1	0	-0.08	1	0	0.04	1	0	0.00691	1	0	0.09	0.96	0.0177288	0.11	1	0	0.07	1	0	-0.06	1	0	-0.000383	1	0	0.06	1	0	-0.02	1	0	0.01	1	0
FBgn0033301	CG12780	-1.58	0.000503	3.29843	-0.71	0.88	0.0555173	-0.5	0.67	0.173925	-0.49	1	0	0.28	0.89	0.05061	-0.17	1	0	0.17	1	0	-0.08	1	0	0.07	1	0	-0.07	1	0	0.14	0.97	0.0132283	-0.29	0.72	0.142668	-0.02	1	0	0.77	0.02	1.69897	0.83	0.01	2
FBgn0034838	CG12782	1.03	0.44	0.356547	0.84	1	0	0.85	0.5	0.30103	0.86	1	0	-0.00778	1	0	-2.35	1	0	-0.04	1	0	0.69	1	0	-2.24	1	0	0.1	1	0	0.11	1	0	0.29	0.78	0.107905	0.13	1	0	0.24	1	0	0.32	0.98	0.00877392
FBgn0038448	CG12783	1.03	0.75	0.124939	0.49	1	0	1.26	0.34	0.468521	0.57	1	0	-1.5	0.81	0.091515	-2.43	1	0	1.35	1	0	1.22	0.96	0.0177288	1.02	1	0	0.5	0.16	0.79588	0.51	0.18	0.744727	0.82	0.00136	2.86646	0.4	0.84	0.0757207	0.52	0.69	0.161151	0.51	0.69	0.161151
FBgn0038356	CG12784	0.93	0.87	0.0604807	0.62	1	0	1.02	0.56	0.251812	#N/A	#N/A	#N/A	#N/A	#N/A	#N/A	#N/A	#N/A	#N/A	#N/A	#N/A	#N/A	#N/A	#N/A	#N/A	#N/A	#N/A	#N/A	-0.19	0.94	0.0268721	0.08	1	0	0.01	1	0	0.29	0.91	0.0409586	0.47	0.67	0.173925	0.47	0.63	0.200659
FBgn0031041	CG12788	-0.05	1	0	-0.22	1	0	-0.07	1	0	-0.26	1	0	-0.25	0.83	0.0809219	0.04	1	0	0.00355	1	0	0.26	0.96	0.0177288	0.16	1	0	0.06	1	0	-0.13	1	0	-0.08	1	0	0.34	0.78	0.107905	0.17	1	0	0.29	0.94	0.0268721
FBgn0031535	CG12795	0.41	0.87	0.0604807	0.08	1	0	0.12	1	0	-0.29	1	0	-0.44	0.44	0.356547	0.16	1	0	0.06	1	0	0.3	0.66	0.180456	0.05	1	0	-0.03	1	0	-0.16	0.95	0.0222764	0.11	0.97	0.0132283	0.35	0.69	0.161151	0.2	1	0	0.05	1	0
FBgn0029909	CG12796	-1.49	1	0	-1.38	1	0	-0.65	1	0	-4.71	1	0	-0.59	0.98	0.00877392	-1.07	1	0	0.69	1	0	0.05	1	0	0.58	1	0	-0.00249	1	0	-1.89	0.73	0.136677	0.98	0.85	0.0705811	0.19	1	0	1.37	0.69	0.161151	0.25	1	0
FBgn0037779	CG12811	-0.17	1	0	-0.05	1	0	-0.22	1	0	0.18	1	0	0.04	1	0	0.22	1	0	-0.00804	1	0	0.03	1	0	0.11	1	0	-0.13	0.94	0.0268721	-0.09	1	0	-0.22	0.76	0.119186	0.04	1	0	-0.1	1	0	-0.04	1	0
FBgn0037796	CG12814	-0.07	1	0	-0.04	1	0	-0.07	1	0	0.03	1	0	0.36	0.69	0.161151	-0.48	1	0	0.26	1	0	-0.48	0.94	0.0268721	0.05	1	0	-0.15	0.9	0.0457575	-0.07	1	0	-0.13	0.93	0.0315171	-0.06	1	0	-0.22	0.94	0.0268721	-0.03	1	0
FBgn0037798	CG12817	0.91	1	0	1.36	1	0	1.1	0.72	0.142668	0.72	1	0	1.03	0.63	0.200659	0.57	1	0	0.53	1	0	-0.24	1	0	-0.04	1	0	0.16	0.97	0.0132283	0.21	0.96	0.0177288	0.09	1	0	0.04	1	0	-0.04	1	0	-0.16	1	0
FBgn0037809	CG12818	-0.12	1	0	0.14	1	0	-0.07	1	0	-0.26	1	0	-0.43	0.66	0.180456	0.05	1	0	0.04	1	0	0.32	0.96	0.0177288	0.16	1	0	0.05	1	0	0.07	1	0	-0.06	1	0	0.38	0.91	0.0409586	0.18	1	0	0.21	1	0
FBgn0033229	CG12822	0.07	1	0	-0.03	1	0	-0.07	1	0	-0.11	1	0	0.00483	1	0	-0.02	1	0	0.000258	1	0	0.13	0.96	0.0177288	0.1	1	0	-0.0064	1	0	0.07	1	0	0.04	1	0	-0.05	1	0	0.00761	1	0	-0.16	1	0
FBgn0033222	CG12824	-0.12	1	0	-0.26	1	0	-0.81	0.16	0.79588	0.4	1	0	0.27	0.9	0.0457575	-0.31	1	0	0.61	1	0	-0.34	0.96	0.0177288	-0.08	1	0	-0.06	1	0	-0.38	0.67	0.173925	-0.16	0.95	0.0222764	0.09	1	0	0.28	1	0	0.27	1	0
FBgn0033221	CG12825	-0.74	0.51	0.29243	-0.68	1	0	-1.17	0.05	1.30103	0.36	1	0	0.39	0.67	0.173925	-0.21	1	0	0.12	1	0	-0.4	0.96	0.0177288	-0.16	1	0	0.07	1	0	-0.07	1	0	-0.12	0.9	0.0457575	0.17	0.96	0.0177288	0.11	1	0	0.14	1	0
FBgn0033207	CG12826	0.25	1	0	0.73	1	0	0.59	0.72	0.142668	1.71	1	0	2.01	0.69	0.161151	0.82	1	0	0.15	1	0	0.67	0.96	0.0177288	0.79	1	0	-2.78	0.15	0.823909	-0.06	1	0	-0.27	1	0	-0.17	1	0	-0.16	1	0	-0.77	0.71	0.148742
FBgn0033145	CG12828	-2.41	1	0	-2.25	1	0	0.74	1	0	3.26	1	0	2.39	0.9	0.0457575	0.05	1	0	-2.39	1	0	-2.36	0.96	0.0177288	0.16	1	0	0.17	0.94	0.0268721	0.02	1	0	-0.06	1	0	-0.1	1	0	-0.07	1	0	0.04	1	0
FBgn0033141	CG12831	0.98	0.51	0.29243	0.71	1	0	1.3	0.13	0.886057	0.00581	1	0	-0.00771	1	0	-0.1	1	0	2.28	1	0	-0.04	1	0	0.08	1	0	0.46	0.27	0.568636	0.52	0.22	0.657577	0.4	0.38	0.420216	0.21	0.92	0.0362122	0.34	0.7	0.154902	0.4	0.5	0.30103
FBgn0033140	CG12836	-0.03	1	0	0.13	1	0	2.27	1	0	-1.77	1	0	-0.95	0.91	0.0409586	-1.04	1	0	-0.03	1	0	-0.15	1	0	0.7	1	0	0.79	0.88	0.0555173	-0.04	1	0	0.47	0.98	0.00877392	0.55	0.96	0.0177288	0.06	1	0	-0.22	1	0
FBgn0040666	CG12848	-0.07	1	0	0.11	1	0	-0.09	1	0	0.04	1	0	0.06	1	0	0.15	1	0	-0.14	1	0	-0.00406	1	0	0.08	1	0	0.49	0.42	0.376751	0.25	0.9	0.0457575	0.35	0.69	0.161151	0.08	1	0	0.01	1	0	-0.11	1	0
FBgn0035068	CG12849	#N/A	#N/A	#N/A	#N/A	#N/A	#N/A	#N/A	#N/A	#N/A	#N/A	#N/A	#N/A	#N/A	#N/A	#N/A	#N/A	#N/A	#N/A	#N/A	#N/A	#N/A	#N/A	#N/A	#N/A	#N/A	#N/A	#N/A	#N/A	#N/A	#N/A	#N/A	#N/A	#N/A	#N/A	#N/A	#N/A	-0.03	1	0	-2.22	1	0	-2.3	1	0
FBgn0035086	CG12851	-0.04	1	0	-0.18	1	0	0.25	1	0	0.18	1	0	0.38	0.7	0.154902	-0.24	1	0	0.29	1	0	-0.18	1	0	0.23	1	0	-0.09	0.98	0.00877392	-0.12	0.96	0.0177288	-0.11	0.94	0.0268721	-0.03	1	0	-0.04	1	0	0.06	1	0
FBgn0040747	CG12853	0.99	0.34	0.468521	0.59	1	0	1.14	0.11	0.958607	-0.39	1	0	-1.79	0.82	0.0861861	-0.51	1	0	-2.39	1	0	1.58	0.96	0.0177288	-2.24	1	0	0.11	0.92	0.0362122	0.3	0.35	0.455932	0.31	0.24	0.619789	0.16	0.87	0.0604807	0.25	0.53	0.275724	0.33	0.18	0.744727
FBgn0033963	CG12857	0.53	1	0	0.62	1	0	0.73	0.55	0.259637	-0.85	1	0	-0.04	1	0	-0.76	1	0	0.19	1	0	0.24	1	0	-0.38	1	0	0.31	0.61	0.21467	0.25	0.81	0.091515	0.36	0.45	0.346787	0.03	1	0	0.15	1	0	0.22	1	0
FBgn0033958	CG12858	-0.58	1	0	-0.23	1	0	-0.28	1	0	0.23	1	0	0.43	0.51	0.29243	-0.27	1	0	0.22	1	0	-0.35	0.96	0.0177288	-0.17	1	0	0.04	1	0	0.00111	1	0	-0.19	0.67	0.173925	-0.02	1	0	0.05	1	0	-0.08	1	0
FBgn0033961	CG12859	-0.29	1	0	-0.14	1	0	-0.5	0.81	0.091515	0.02	1	0	0.3	0.65	0.187087	-0.21	1	0	-0.09	1	0	-0.07	1	0	-0.06	1	0	-0.13	0.94	0.0268721	-0.14	0.95	0.0222764	-0.34	0.36	0.443697	0.04	1	0	0.44	0.31	0.508638	0.13	1	0
FBgn0033954	CG12860	0.87	0.38	0.420216	0.47	1	0	1.1	0.08	1.09691	0.4	1	0	0.53	0.98	0.00877392	0.27	1	0	-0.07	1	0	2.18	0.96	0.0177288	3.34	1	0	0.14	0.94	0.0268721	0.24	0.79	0.102373	0.24	0.73	0.136677	0.21	0.65	0.187087	0.31	0.27	0.568636	0.34	0.15	0.823909
FBgn0033953	CG12861	0.94	0.35	0.455932	0.75	1	0	1.14	0.09	1.04576	-0.71	1	0	-0.04	1	0	-0.44	1	0	-0.07	1	0	3.89	0.96	0.0177288	0.08	1	0	0.16	0.9	0.0457575	0.3	0.61	0.21467	0.27	0.63	0.200659	0.15	0.89	0.05061	0.26	0.49	0.309804	0.36	0.11	0.958607
FBgn0033948	CG12863	-0.04	1	0	0.11	1	0	0.13	1	0	-0.16	1	0	-0.3	0.8	0.09691	0.02	1	0	0.04	1	0	0.21	0.96	0.0177288	0.1	1	0	-0.3	0.84	0.0757207	-0.1	1	0	-0.07	1	0	0.32	0.96	0.0177288	-0.02	1	0	0.28	1	0
FBgn0033955	CG12866	0.67	1	0	0.56	1	0	0.88	0.5	0.30103	0.03	1	0	2.39	0.9	0.0457575	0.05	1	0	2.28	1	0	-0.04	1	0	0.08	1	0	-0.03	1	0	0.09	1	0	0.11	1	0	0.27	0.95	0.0222764	0.26	1	0	0.45	0.76	0.119186
FBgn0033945	CG12868	-0.28	1	0	-0.21	1	0	-0.32	1	0	-0.11	1	0	-0.09	1	0	-0.19	1	0	0.03	1	0	0.17	0.96	0.0177288	-0.06	1	0	-0.19	0.9	0.0457575	-0.11	1	0	-0.39	0.45	0.346787	-0.03	1	0	-0.16	1	0	-0.05	1	0
FBgn0033943	CG12869	-0.54	1	0	0.1	1	0	-0.79	1	0	-1.51	1	0	-0.6	0.93	0.0315171	-0.48	1	0	-0.03	1	0	-2.34	0.8	0.09691	-1.1	1	0	0.31	0.96	0.0177288	0.34	0.97	0.0132283	0.05	1	0	0.62	0.88	0.0555173	-0.19	1	0	0.04	1	0
FBgn0037506	CG1287	0.84	0.52	0.283997	0.5	1	0	0.85	0.36	0.443697	-0.14	1	0	0.18	1	0	-0.26	1	0	0.97	1	0	-0.33	1	0	0.6	1	0	0.08	0.99	0.00436481	0.2	0.8	0.09691	0.21	0.7	0.154902	0.05	1	0	0.29	0.38	0.420216	0.39	0.09	1.04576
FBgn0039544	CG12877	-0.07	1	0	-0.07	1	0	-0.16	1	0	-0.18	1	0	-0.22	0.81	0.091515	0.02	1	0	-0.03	1	0	0.05	1	0	-0.13	1	0	0.12	0.96	0.0177288	-0.25	0.8	0.09691	-0.16	0.93	0.0315171	0.31	0.79	0.102373	0.04	1	0	-0.13	1	0
FBgn0250845	CG1288	0.87	0.36	0.443697	0.69	1	0	0.96	0.15	0.823909	2.09	1	0	1.36	0.9	0.0457575	-0.1	1	0	-0.07	1	0	3.01	0.96	0.0177288	0.08	1	0	0.25	0.61	0.21467	0.34	0.4	0.39794	0.29	0.44	0.356547	0.34	0.77	0.113509	0.4	0.68	0.167491	0.42	0.57	0.244125
FBgn0046258	CG12880	0.11	1	0	0.07	1	0	0.24	1	0	-0.51	1	0	-0.11	1	0	0.31	1	0	0.17	1	0	0.2	1	0	0.01	1	0	0.26	0.94	0.0268721	0.15	1	0	0.33	0.87	0.0604807	0.41	0.94	0.0268721	0.21	1	0	0.36	1	0
FBgn0039538	CG12883	-0.33	1	0	-0.34	1	0	-0.3	1	0	-0.49	0.99	0.00436481	-0.52	0.44	0.356547	-0.07	1	0	-0.05	1	0	0.19	0.96	0.0177288	0.1	1	0	-0.11	1	0	-0.21	0.96	0.0177288	-0.24	0.9	0.0457575	0.24	0.97	0.0132283	-0.27	1	0	-0.11	1	0
FBgn0039523	CG12885	-1.64	0.76	0.119186	-1.55	1	0	-0.38	1	0	0.21	1	0	0.84	0.75	0.124939	-0.03	1	0	-0.17	1	0	-1.45	0.92	0.0362122	-0.08	1	0	0.03	1	0	-0.16	1	0	0.19	1	0	-0.23	1	0	-0.42	1	0	-0.33	1	0
FBgn0033523	CG12895	-0.07	1	0	0.21	1	0	-0.09	1	0	-0.03	1	0	0.11	1	0	-0.1	1	0	-0.24	1	0	-0.18	0.96	0.0177288	-0.15	1	0	-0.07	1	0	-0.04	1	0	-0.07	1	0	-0.03	1	0	-0.09	1	0	-0.08	1	0
FBgn0033521	CG12896	1.74	0.58	0.236572	1.41	1	0	1.89	0.32	0.49485	-0.05	1	0	-0.36	0.98	0.00877392	-0.71	1	0	0.56	1	0	0.1	1	0	-0.35	1	0	-0.13	0.99	0.00436481	-0.24	0.9	0.0457575	0.1	1	0	-0.18	0.98	0.00877392	-0.28	1	0	0.19	1	0
FBgn0033516	CG12898	#N/A	#N/A	#N/A	#N/A	#N/A	#N/A	#N/A	#N/A	#N/A	-0.51	1	0	-1.52	0.56	0.251812	-0.45	1	0	4.36	1	0	3.01	0.96	0.0177288	2.48	1	0	0.35	1	0	-0.19	1	0	0.82	0.97	0.0132283	0.36	1	0	0.57	1	0	0.73	1	0
FBgn0033512	CG12902	0.88	0.55	0.259637	0.64	1	0	0.95	0.33	0.481486	0.65	1	0	1.23	0.79	0.102373	0.76	1	0	0.36	1	0	0.23	1	0	-3.62	1	0	0.18	0.84	0.0757207	0.32	0.53	0.275724	0.25	0.67	0.173925	0.19	0.77	0.113509	0.32	0.26	0.585027	0.35	0.15	0.823909
FBgn0250840	CG12907	1.03	0.31	0.508638	0.78	1	0	1.22	0.07	1.1549	0.92	1	0	-0.86	0.99	0.00436481	-0.95	1	0	-0.04	1	0	0.69	1	0	1.55	1	0	0.15	0.9	0.0457575	0.48	0.11	0.958607	0.44	0.14	0.853872	0.32	0.58	0.236572	0.4	0.33	0.481486	0.44	0.21	0.677781
FBgn0033507	CG12909	-0.06	1	0	-0.14	1	0	-0.28	1	0	0.05	1	0	-0.00116	1	0	0.18	1	0	0.01	1	0	0.15	0.96	0.0177288	0.06	1	0	0.14	0.99	0.00436481	-0.2	0.96	0.0177288	0.11	1	0	0.78	0.56	0.251812	0.43	0.99	0.00436481	0.14	1	0
FBgn0035401	CG1291	-0.09	1	0	-0.16	1	0	-0.34	0.92	0.0362122	0.000817	1	0	-0.18	0.9	0.0457575	0.09	1	0	-0.02	1	0	0.23	0.96	0.0177288	-0.04	1	0	-0.15	0.88	0.0555173	-0.13	0.96	0.0177288	-0.13	0.94	0.0268721	-0.07	1	0	-0.07	1	0	-0.05	1	0
FBgn0033502	CG12910	-0.78	0.66	0.180456	-0.46	1	0	-0.97	0.28	0.552842	0.21	1	0	0.04	1	0	0.16	1	0	0.46	1	0	-0.2	1	0	0.39	1	0	0.18	0.96	0.0177288	-0.04	1	0	0.17	0.96	0.0177288	-0.07	1	0	-0.23	1	0	-0.03	1	0
FBgn0033501	CG12911	-0.84	1	0	-0.8	1	0	-0.69	1	0	-1.12	1	0	-1.54	0.75	0.124939	-0.69	1	0	0.88	1	0	-1.43	0.96	0.0177288	0.31	1	0	-1.15	0.84	0.0757207	-0.6	0.98	0.00877392	-0.29	1	0	0.14	1	0	-1.16	0.97	0.0132283	-0.61	1	0
FBgn0033497	CG12912	4.41	0.98	0.00877392	3.21	1	0	6.12	0.41	0.387216	-0.39	1	0	-0.00744	1	0	-0.51	1	0	0.43	1	0	-0.72	0.96	0.0177288	-0.37	1	0	0.75	0.1	1	0.22	0.96	0.0177288	0.00899	1	0	-0.16	1	0	0.23	1	0	0.05	1	0
FBgn0033500	CG12913	0.26	1	0	0.1	1	0	0.22	1	0	0.85	1	0	0.86	0.58	0.236572	-0.1	1	0	-0.15	1	0	-0.87	0.96	0.0177288	-0.45	1	0	-0.09	1	0	0.34	0.77	0.113509	-0.19	0.94	0.0268721	-0.07	1	0	-0.03	1	0	-0.06	1	0
FBgn0033499	CG12914	0.9	0.91	0.0409586	0.6	1	0	0.89	0.73	0.136677	-2.37	1	0	-2.27	0.9	0.0457575	1.28	1	0	2.28	1	0	2.18	0.96	0.0177288	0.08	1	0	0.24	0.71	0.148742	0.26	0.73	0.136677	0.49	0.12	0.920819	0.02	1	0	0.17	1	0	0.26	1	0
FBgn0033490	CG12917	0.77	1	0	1.2	1	0	1.1	0.49	0.309804	-0.62	1	0	0.15	1	0	-0.75	1	0	-0.6	1	0	-1.13	0.96	0.0177288	-0.8	1	0	-0.18	0.94	0.0268721	0.25	0.85	0.0705811	0.23	0.85	0.0705811	0.16	1	0	0.25	1	0	0.31	1	0
FBgn0033481	CG12920	-3.27	1	0	-0.85	1	0	-0.97	1	0	-0.03	1	0	2.4	0.61	0.21467	-3.23	1	0	-2.39	1	0	-0.14	1	0	0.16	1	0	-0.57	1	0	1.21	0.88	0.0555173	0.45	1	0	-0.43	1	0	-4.94	0.73	0.136677	-1.31	0.87	0.0604807
FBgn0033461	CG12923	1.05	0.36	0.443697	0.9	0.98	0.00877392	1.37	0.06	1.22185	0.95	1	0	-0.56	1	0	-3.74	1	0	-1.41	1	0	-3.74	0.96	0.0177288	-1.22	1	0	0.21	0.84	0.0757207	0.34	0.62	0.207608	0.37	0.44	0.356547	0.05	1	0	0.21	1	0	0.35	0.68	0.167491
FBgn0033437	CG12926	-0.08	1	0	-0.28	1	0	-0.28	1	0	0.56	1	0	0.3	0.9	0.0457575	-0.28	1	0	-0.09	1	0	-0.24	0.98	0.00877392	-0.08	1	0	0.41	0.29	0.537602	0.18	0.9	0.0457575	0.02	1	0	-0.06	1	0	-0.21	1	0	-0.15	1	0
FBgn0033429	CG12929	0.37	1	0	0.26	1	0	0.28	1	0	-0.24	1	0	0.06	1	0	0.2	1	0	-0.03	1	0	-0.02	1	0	0.14	1	0	-0.07	1	0	0.32	0.84	0.0757207	0.02	1	0	0.05	1	0	0.11	1	0	0.18	1	0
FBgn0033541	CG12934	-0.39	1	0	-0.41	1	0	-0.46	0.79	0.102373	0.92	1	0	0.65	0.81	0.091515	0.42	1	0	0.33	1	0	-0.65	0.96	0.0177288	-0.75	1	0	-0.38	0.95	0.0222764	-0.5	0.91	0.0409586	-0.77	0.66	0.180456	0.64	0.75	0.124939	-0.08	1	0	0.02	1	0
FBgn0033547	CG12935	-0.05	1	0	-0.07	1	0	0.2	1	0	-0.09	1	0	-0.2	0.9	0.0457575	-0.09	1	0	-0.04	1	0	0.07	1	0	0.06	1	0	0.05	1	0	0.19	0.97	0.0132283	-0.04	1	0	0.22	0.98	0.00877392	0.27	1	0	0.26	1	0
FBgn0033569	CG12942	0.02	1	0	0.16	1	0	0.09	1	0	-0.24	1	0	-0.41	0.48	0.318759	0.09	1	0	0.06	1	0	0.21	0.93	0.0315171	0.1	1	0	0.21	0.92	0.0362122	0.06	1	0	0.37	0.59	0.229148	0.88	0.36	0.443697	0.34	1	0	0.14	1	0
FBgn0037755	CG12945	0.11	1	0	0.12	1	0	0.02	1	0	-0.1	1	0	-0.15	0.9	0.0457575	0.07	1	0	0.01	1	0	0.26	0.73	0.136677	0.11	1	0	-0.14	0.93	0.0315171	-0.11	0.98	0.00877392	-0.12	0.94	0.0268721	0.14	0.96	0.0177288	-0.09	1	0	-0.08	1	0
FBgn0037753	CG12947	0.13	1	0	-0.00625	1	0	-0.16	1	0	0.61	1	0	0.78	0.63	0.200659	0.23	1	0	0.18	1	0	-0.11	1	0	0.05	1	0	-0.05	1	0	-0.08	1	0	-0.66	0.64	0.19382	0.19	1	0	0.19	1	0	0.42	1	0
FBgn0037739	CG12948	0.19	1	0	-0.01	1	0	0.15	1	0	-0.09	1	0	-0.31	0.7	0.154902	0.14	1	0	-0.03	1	0	0.19	0.96	0.0177288	0.18	1	0	0.14	0.96	0.0177288	0.05	1	0	0.13	0.96	0.0177288	0.37	0.89	0.05061	-0.04	1	0	0.03	1	0
FBgn0037736	CG12950	-0.09	1	0	0.05	1	0	0.1	1	0	0.33	1	0	0.44	0.6	0.221849	-0.22	1	0	0.17	1	0	-0.24	0.99	0.00436481	-0.29	1	0	-0.03	1	0	0.00621	1	0	-0.23	0.71	0.148742	0.00226	1	0	-0.07	1	0	-0.08	1	0
FBgn0037677	CG12951	-0.16	1	0	-0.64	0.87	0.0604807	-0.37	0.88	0.0555173	-0.56	1	0	-0.59	0.97	0.0132283	-2.43	1	0	2.28	1	0	-0.04	1	0	0.08	1	0	1.29	0.87	0.0604807	-0.19	1	0	0.43	1	0	-0.03	1	0	2.45	1	0	-0.00902	1	0
FBgn0034031	CG12963	-0.06	1	0	-0.31	1	0	-0.21	1	0	0.31	1	0	0.17	0.9	0.0457575	-0.34	1	0	-0.12	1	0	-0.52	0.69	0.161151	-0.25	1	0	0.26	0.46	0.337242	0.00624	1	0	0.16	0.79	0.102373	0.04	1	0	0.12	1	0	-0.0051	1	0
FBgn0034022	CG12964	-0.82	1	0	-0.66	1	0	-0.83	0.81	0.091515	-2.62	1	0	0.55	1	0	-2.73	1	0	-0.26	1	0	-1.8	0.84	0.0757207	-0.91	1	0	0.15	1	0	0.14	1	0	1.3	0.84	0.0757207	1.26	0.72	0.142668	1.03	0.92	0.0362122	0.6	1	0
FBgn0034047	CG12970	-3.8	1	0	-0.54	1	0	-1.5	1	0	2.34	1	0	2.05	0.75	0.124939	2.42	1	0	-0.03	1	0	0.99	0.96	0.0177288	1.12	1	0	-2.06	0.59	0.229148	-0.85	0.95	0.0222764	-0.51	0.99	0.00436481	-0.98	0.92	0.0362122	-1.7	0.8	0.09691	-0.92	1	0
FBgn0037078	CG12971	-4.19	1	0	-0.93	1	0	-1.89	0.97	0.0132283	-1.38	1	0	1.31	0.84	0.0757207	1.03	1	0	2.86	1	0	0.69	1	0	-2.24	1	0	-2.25	0.71	0.148742	-2.26	0.76	0.119186	-0.41	1	0	2.07	0.32	0.49485	2.2	0.28	0.552842	1.31	0.85	0.0705811
FBgn0037065	CG12974	-0.11	1	0	-0.21	1	0	-0.29	0.91	0.0409586	0.37	1	0	0.46	0.45	0.346787	0.09	1	0	0.11	1	0	-0.43	0.89	0.05061	-0.2	1	0	0.44	0.23	0.638272	0.12	0.97	0.0132283	0.15	0.93	0.0315171	0.03	1	0	0.13	1	0	-0.03	1	0
FBgn0037061	CG12975	-0.23	1	0	-0.29	1	0	-0.39	1	0	-0.05	1	0	-0.12	1	0	0.09	1	0	-0.12	1	0	0.14	0.96	0.0177288	-0.02	1	0	0.16	0.98	0.00877392	0.25	0.92	0.0362122	0.34	0.76	0.119186	0.12	1	0	-0.11	1	0	-0.26	1	0
FBgn0037040	CG12983	0.85	0.5	0.30103	0.56	1	0	0.86	0.34	0.468521	4.18	1	0	4.45	0.71	0.148742	4.36	1	0	-0.03	1	0	-3.21	0.96	0.0177288	-3.09	1	0	0.46	0.13	0.886057	0.26	0.69	0.161151	0.35	0.35	0.455932	0.19	0.77	0.113509	0.09	1	0	0.26	0.43	0.366532
FBgn0037042	CG12984	0.14	1	0	0.87	1	0	0.29	1	0	0.77	1	0	-0.42	1	0	-0.51	1	0	0.19	1	0	0.4	1	0	0.18	1	0	0.00677	1	0	0.07	1	0	-0.27	0.97	0.0132283	0.53	0.88	0.0555173	0.44	1	0	0.59	0.86	0.0655015
FBgn0030881	CG12985	0.83	0.96	0.0177288	0.93	1	0	1.12	0.43	0.366532	-1.7	1	0	-0.65	0.9	0.0457575	-1.11	1	0	-0.03	1	0	-0.29	1	0	0.05	1	0	0.21	0.95	0.0222764	0.19	0.97	0.0132283	0.33	0.8	0.09691	0.24	0.98	0.00877392	0.47	0.94	0.0268721	0.36	1	0
FBgn0030868	CG12986	#N/A	#N/A	#N/A	#N/A	#N/A	#N/A	#N/A	#N/A	#N/A	0.03	1	0	2.39	0.9	0.0457575	2.31	1	0	0.82	1	0	-2.36	0.96	0.0177288	-2.24	1	0	-0.09	1	0	2.2	0.97	0.0132283	2.29	0.94	0.0268721	-2.31	0.96	0.0177288	-2.22	1	0	-2.3	1	0
FBgn0035501	CG1299	0.17	1	0	0.2	1	0	-0.17	1	0	0.03	1	0	0.21	0.9	0.0457575	-0.51	1	0	0.03	1	0	-0.52	0.94	0.0268721	-0.02	1	0	-0.05	1	0	-0.11	0.97	0.0132283	-0.06	1	0	-0.33	0.73	0.136677	-0.25	0.94	0.0268721	-0.22	1	0
FBgn0030859	CG12990	1.37	1	0	-0.85	1	0	0.8	1	0	0.83	1	0	0.94	0.78	0.107905	0.7	1	0	-0.88	1	0	-0.81	0.96	0.0177288	-1.22	1	0	-0.07	0.98	0.00877392	-0.34	0.19	0.721246	-0.04	1	0	-0.37	0.09	1.04576	-0.32	0.25	0.60206	-0.22	0.63	0.200659
FBgn0030847	CG12991	0.01	1	0	-0.09	1	0	0.01	1	0	-0.03	1	0	0.03	1	0	-0.12	1	0	0.08	1	0	-0.04	1	0	-0.09	1	0	0.05	1	0	-0.01	1	0	-0.02	1	0	0.00751	1	0	-0.12	1	0	-0.04	1	0
FBgn0030846	CG12992	0.7	0.67	0.173925	0.44	1	0	0.74	0.44	0.356547	-0.24	1	0	-0.1	1	0	-0.26	1	0	0.2	1	0	-0.51	0.96	0.0177288	-0.29	1	0	0.29	0.34	0.468521	0.28	0.44	0.356547	0.33	0.21	0.677781	0.26	0.89	0.05061	0.34	0.76	0.119186	0.4	0.55	0.259637
FBgn0040877	CG12994	-0.12	1	0	0.27	1	0	1.08	0.92	0.0362122	-0.17	1	0	-0.47	0.91	0.0409586	-0.86	1	0	0.15	1	0	-1.27	0.94	0.0268721	-0.51	1	0	-0.04	1	0	-0.12	1	0	-0.03	1	0	-0.43	0.93	0.0315171	-0.28	1	0	-0.41	1	0
FBgn0030826	CG12995	#N/A	#N/A	#N/A	#N/A	#N/A	#N/A	#N/A	#N/A	#N/A	-0.15	1	0	-0.04	1	0	-0.63	1	0	-1.54	1	0	-1.28	0.96	0.0177288	-1.87	1	0	-1.1	0.51	0.29243	-1.27	0.46	0.337242	-0.06	1	0	-0.47	0.96	0.0177288	-0.5	1	0	-0.58	1	0
FBgn0030829	CG12998	2.28	1	0	3.78	1	0	-0.06	1	0	0.18	1	0	0.88	0.59	0.229148	-0.96	1	0	-0.64	1	0	-0.82	0.76	0.119186	-0.69	1	0	-0.9	0.89	0.05061	-1.17	0.84	0.0757207	-0.25	1	0	-0.84	0.93	0.0315171	0.47	1	0	0.19	1	0
FBgn0030807	CG13000	2.28	1	0	3.23	1	0	-0.06	1	0	-2.87	1	0	0.29	1	0	0.07	1	0	-1.8	1	0	-1.07	0.96	0.0177288	-1.6	1	0	-3.32	0.83	0.0809219	-3.33	0.87	0.0604807	-3.27	0.85	0.0705811	-3.16	0.92	0.0362122	-3.07	1	0	-0.81	1	0
[truncated: 14,794 more rows]
